# Supplementary material for: Identification and Molecular Characterization of a Divergent Asian-like Canine Parvovirus Type 2b (CPV-2b) Strain in Southern Italy
Source: MDPI journal article supplement (doi:10.3390/ijms231911240), 2022-09-24
Supplement: s1 [file s1]

**Supplementary Material Figure S1.** Close relatives to the CPV-2b strain identified in this study.

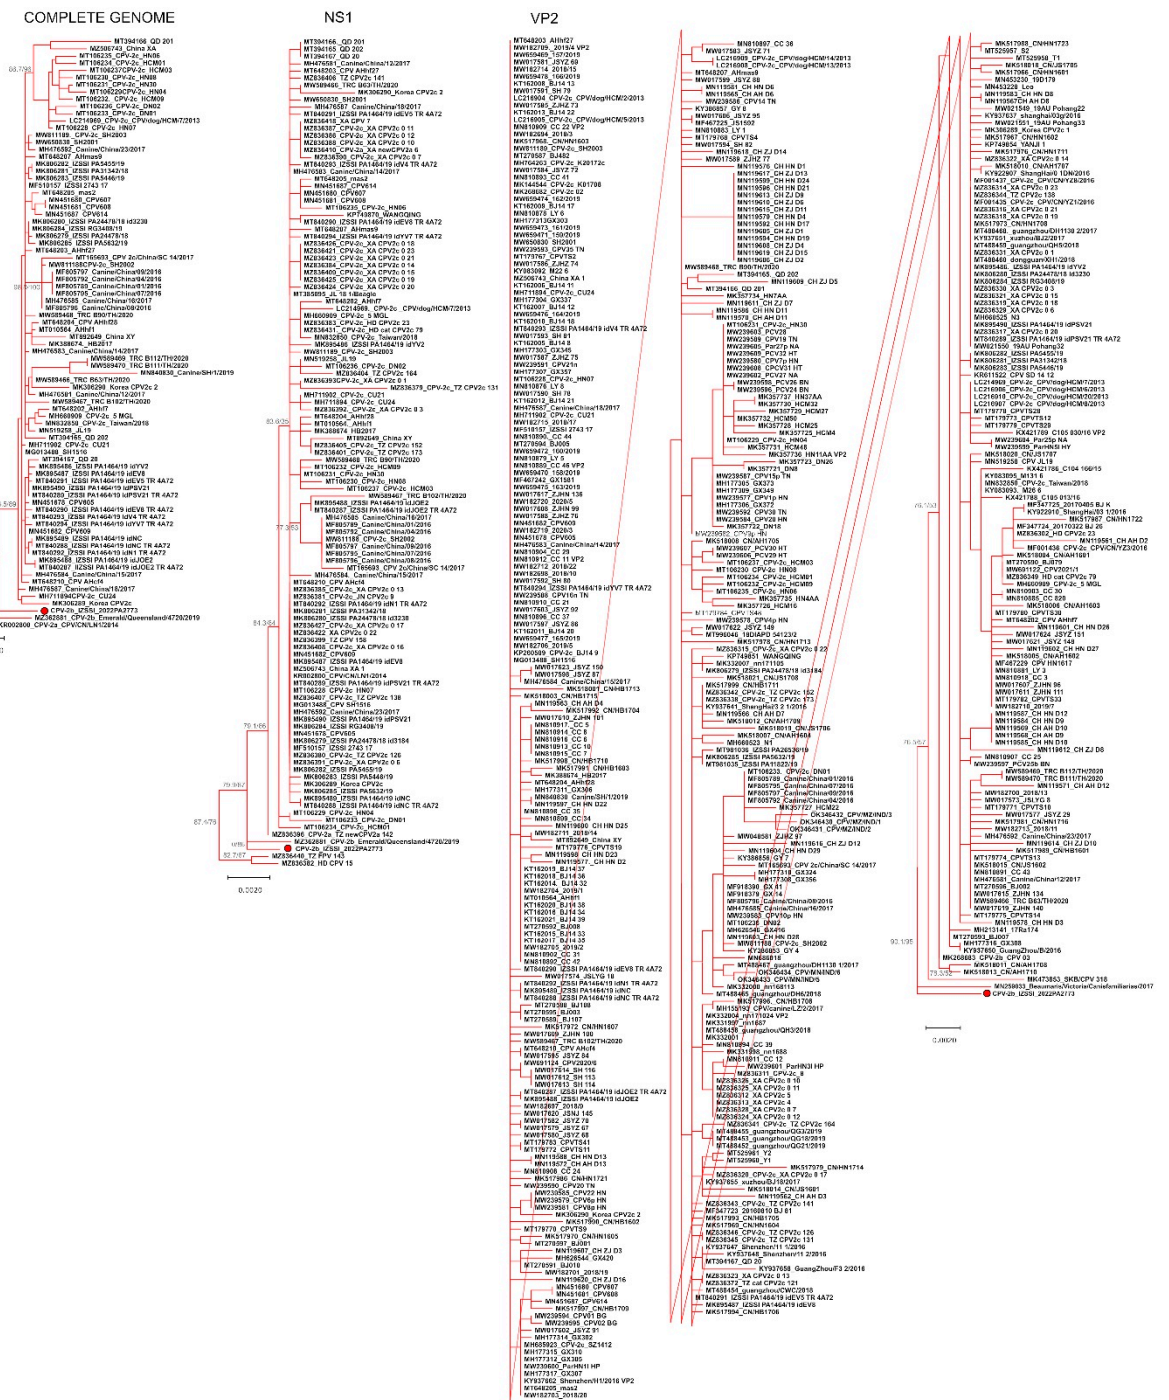

**Supplementary Material Figure S2.** Sequence analysis of Asian CPV-2c-like strains key amino acid residues.

|         | Asian CPV-2-like                                                                                                                                                                                                                                                                                                                                                                                                                                                                                                                                                                                                                                                                                                                                                                                                                                                                                                                                                                                                                                                                                                                                                                                                                                                                                                                                                                                                                                                                                         | Other clades |     |     |     |     |     |     |    |      |     |     |     |     |     |     |     |     |   |       |   |   |   |   |   |   |   |   |     |   |   |                                                                                                                                                                                                                                                                                                                                                                                                                                                                                                                                                                                                                                                                                |         |   |   |   |  |   |    |     |     |     |     |   |   |   |   |    |   |   |   |   |    |   |   |   |   |    |   |   |   |   |   |   |   |   |   |   |   |   |   |   |   |   |   |   |   |   |   |   |   |   |   |   |   |   |   |   |   |   |  |   |   |   |   |   |   |   |   |   |   |   |   |   |   |   |   |   |  |   |   |   |   |   |   |   |   |  |   |   |   |   |   |   |   |   |  |   |   |   |   |   |   |   |   |                                                                                                                                                                                                                                                                                                                                                                                                                                                                                                                                                                                                                                                                                                                                                                                                                                                                                                                                                                                                                                                                                                                                                                                                                                                                                                                                                                                                                                                                                                                                                                                                                                                                                                                                                                                                                                                                                                                                                                                                                                                                                                                                                                                                                                                                                                                                                                                                                                                                                                                                                                                                                                                                                                                                                                                                                                                                                                                                                                                                                                                                                                                                                                                                                                                                                                                                                                                                                                                                                                                                                                                                                                                                |         |  |  |  |  |  |  |  |      |  |   |     |     |     |     |     |     |   |       |   |   |   |   |   |   |   |  |    |   |   |   |   |   |   |   |  |   |   |   |   |   |   |   |   |  |   |   |   |   |   |   |   |   |  |   |   |   |   |   |   |   |   |  |   |   |   |   |   |   |   |   |  |   |   |   |   |   |   |   |   |  |   |   |   |   |   |   |   |   |  |   |   |   |   |   |   |   |   |  |   |   |   |   |   |   |   |   |  |   |   |   |   |   |   |   |   |  |   |   |   |   |   |   |   |   |  |   |   |   |   |   |   |   |   |   |       |   |   |   |   |   |   |   |  |     |   |   |   |   |   |   |   |  |    |   |   |   |   |   |   |   |  |    |   |   |   |   |   |   |   |  |    |   |   |   |   |   |   |   |  |    |   |   |   |   |   |   |   |  |    |   |   |   |   |   |   |   |  |   |   |   |   |   |   |   |   |  |   |   |   |   |   |   |   |   |  |   |   |   |   |   |   |   |   |  |   |   |   |   |   |   |   |   |  |   |   |   |   |   |   |   |   |  |   |   |   |   |   |   |   |   |  |   |   |   |   |   |   |   |   |  |   |   |   |   |   |   |   |   |  |   |   |   |   |   |   |   |   |  |   |   |   |   |   |   |   |   |  |   |   |   |   |   |   |   |   |  |   |   |   |   |   |   |   |   |   |     |   |   |   |   |   |   |   |  |   |   |   |   |   |   |   |   |                                                                                                                                                                                                                                                                                                                                                                                                                                                                                                                                                                                                                                                                                                                                                                                                                                                                                                                                                                                                                                                                                                                                                                                                                                                                                                                                                                                                                                                                                                                                                                                                                                                                                                                                                                                                                                                                                                                                                                                                                                                                                                                                                                                                                                                                                                                                                                                                                                                                                                                                                                                                                                                                                                                                                                                                                                                                                                                                                                                                                                                                                                                                                                                                                                                                                                                                                                                                                                                                                                                                                                                                                                                                                                                                                                  |         |  |  |  |  |  |  |  |      |  |   |     |     |     |     |     |     |       |       |   |   |   |   |   |   |   |  |     |   |   |   |   |   |   |   |  |     |   |   |   |   |   |   |   |  |     |   |   |   |   |   |   |   |  |    |   |   |   |   |   |   |   |  |    |   |   |   |   |   |   |   |  |    |   |   |   |   |   |   |   |  |    |   |   |   |   |   |   |   |  |    |   |   |   |   |   |   |   |  |    |   |   |   |   |   |   |   |  |   |   |   |   |   |   |   |   |  |   |   |   |   |   |   |   |   |  |   |   |   |   |   |   |   |   |  |   |   |   |   |   |   |   |   |  |   |   |   |   |   |   |   |   |  |   |   |   |   |   |   |   |   |  |   |   |   |   |   |   |   |   |  |   |   |   |   |   |   |   |   |  |   |   |   |   |   |   |   |   |  |   |   |   |   |   |   |   |   |  |   |   |   |   |   |   |   |   |  |   |   |   |   |   |   |   |   |  |   |   |   |   |   |   |   |   |  |   |   |   |   |   |   |   |   |  |   |   |   |   |   |   |   |   |  |   |   |   |   |   |   |   |   |  |   |   |   |   |   |   |   |   |  |   |   |   |   |   |   |   |   |  |   |   |   |   |   |   |   |   |  |   |   |   |   |   |   |   |   |  |   |   |   |   |   |   |   |   |  |   |   |   |   |   |   |   |   |  |   |   |   |   |   |   |   |   |  |   |   |   |   |   |   |   |   |  |   |   |   |   |   |   |   |   |
|---------|----------------------------------------------------------------------------------------------------------------------------------------------------------------------------------------------------------------------------------------------------------------------------------------------------------------------------------------------------------------------------------------------------------------------------------------------------------------------------------------------------------------------------------------------------------------------------------------------------------------------------------------------------------------------------------------------------------------------------------------------------------------------------------------------------------------------------------------------------------------------------------------------------------------------------------------------------------------------------------------------------------------------------------------------------------------------------------------------------------------------------------------------------------------------------------------------------------------------------------------------------------------------------------------------------------------------------------------------------------------------------------------------------------------------------------------------------------------------------------------------------------|--------------|-----|-----|-----|-----|-----|-----|----|------|-----|-----|-----|-----|-----|-----|-----|-----|---|-------|---|---|---|---|---|---|---|---|-----|---|---|--------------------------------------------------------------------------------------------------------------------------------------------------------------------------------------------------------------------------------------------------------------------------------------------------------------------------------------------------------------------------------------------------------------------------------------------------------------------------------------------------------------------------------------------------------------------------------------------------------------------------------------------------------------------------------|---------|---|---|---|--|---|----|-----|-----|-----|-----|---|---|---|---|----|---|---|---|---|----|---|---|---|---|----|---|---|---|---|---|---|---|---|---|---|---|---|---|---|---|---|---|---|---|---|---|---|---|---|---|---|---|---|---|---|---|---|--|---|---|---|---|---|---|---|---|---|---|---|---|---|---|---|---|---|--|---|---|---|---|---|---|---|---|--|---|---|---|---|---|---|---|---|--|---|---|---|---|---|---|---|---|----------------------------------------------------------------------------------------------------------------------------------------------------------------------------------------------------------------------------------------------------------------------------------------------------------------------------------------------------------------------------------------------------------------------------------------------------------------------------------------------------------------------------------------------------------------------------------------------------------------------------------------------------------------------------------------------------------------------------------------------------------------------------------------------------------------------------------------------------------------------------------------------------------------------------------------------------------------------------------------------------------------------------------------------------------------------------------------------------------------------------------------------------------------------------------------------------------------------------------------------------------------------------------------------------------------------------------------------------------------------------------------------------------------------------------------------------------------------------------------------------------------------------------------------------------------------------------------------------------------------------------------------------------------------------------------------------------------------------------------------------------------------------------------------------------------------------------------------------------------------------------------------------------------------------------------------------------------------------------------------------------------------------------------------------------------------------------------------------------------------------------------------------------------------------------------------------------------------------------------------------------------------------------------------------------------------------------------------------------------------------------------------------------------------------------------------------------------------------------------------------------------------------------------------------------------------------------------------------------------------------------------------------------------------------------------------------------------------------------------------------------------------------------------------------------------------------------------------------------------------------------------------------------------------------------------------------------------------------------------------------------------------------------------------------------------------------------------------------------------------------------------------------------------------------------------------------------------------------------------------------------------------------------------------------------------------------------------------------------------------------------------------------------------------------------------------------------------------------------------------------------------------------------------------------------------------------------------------------------------------------------------------------------------|---------|--|--|--|--|--|--|--|------|--|---|-----|-----|-----|-----|-----|-----|---|-------|---|---|---|---|---|---|---|--|----|---|---|---|---|---|---|---|--|---|---|---|---|---|---|---|---|--|---|---|---|---|---|---|---|---|--|---|---|---|---|---|---|---|---|--|---|---|---|---|---|---|---|---|--|---|---|---|---|---|---|---|---|--|---|---|---|---|---|---|---|---|--|---|---|---|---|---|---|---|---|--|---|---|---|---|---|---|---|---|--|---|---|---|---|---|---|---|---|--|---|---|---|---|---|---|---|---|--|---|---|---|---|---|---|---|---|---|-------|---|---|---|---|---|---|---|--|-----|---|---|---|---|---|---|---|--|----|---|---|---|---|---|---|---|--|----|---|---|---|---|---|---|---|--|----|---|---|---|---|---|---|---|--|----|---|---|---|---|---|---|---|--|----|---|---|---|---|---|---|---|--|---|---|---|---|---|---|---|---|--|---|---|---|---|---|---|---|---|--|---|---|---|---|---|---|---|---|--|---|---|---|---|---|---|---|---|--|---|---|---|---|---|---|---|---|--|---|---|---|---|---|---|---|---|--|---|---|---|---|---|---|---|---|--|---|---|---|---|---|---|---|---|--|---|---|---|---|---|---|---|---|--|---|---|---|---|---|---|---|---|--|---|---|---|---|---|---|---|---|--|---|---|---|---|---|---|---|---|---|-----|---|---|---|---|---|---|---|--|---|---|---|---|---|---|---|---|------------------------------------------------------------------------------------------------------------------------------------------------------------------------------------------------------------------------------------------------------------------------------------------------------------------------------------------------------------------------------------------------------------------------------------------------------------------------------------------------------------------------------------------------------------------------------------------------------------------------------------------------------------------------------------------------------------------------------------------------------------------------------------------------------------------------------------------------------------------------------------------------------------------------------------------------------------------------------------------------------------------------------------------------------------------------------------------------------------------------------------------------------------------------------------------------------------------------------------------------------------------------------------------------------------------------------------------------------------------------------------------------------------------------------------------------------------------------------------------------------------------------------------------------------------------------------------------------------------------------------------------------------------------------------------------------------------------------------------------------------------------------------------------------------------------------------------------------------------------------------------------------------------------------------------------------------------------------------------------------------------------------------------------------------------------------------------------------------------------------------------------------------------------------------------------------------------------------------------------------------------------------------------------------------------------------------------------------------------------------------------------------------------------------------------------------------------------------------------------------------------------------------------------------------------------------------------------------------------------------------------------------------------------------------------------------------------------------------------------------------------------------------------------------------------------------------------------------------------------------------------------------------------------------------------------------------------------------------------------------------------------------------------------------------------------------------------------------------------------------------------------------------------------------------------------------------------------------------------------------------------------------------------------------------------------------------------------------------------------------------------------------------------------------------------------------------------------------------------------------------------------------------------------------------------------------------------------------------------------------------------------------------------------------------------------------------------------------------------------------------------------|---------|--|--|--|--|--|--|--|------|--|---|-----|-----|-----|-----|-----|-----|-------|-------|---|---|---|---|---|---|---|--|-----|---|---|---|---|---|---|---|--|-----|---|---|---|---|---|---|---|--|-----|---|---|---|---|---|---|---|--|----|---|---|---|---|---|---|---|--|----|---|---|---|---|---|---|---|--|----|---|---|---|---|---|---|---|--|----|---|---|---|---|---|---|---|--|----|---|---|---|---|---|---|---|--|----|---|---|---|---|---|---|---|--|---|---|---|---|---|---|---|---|--|---|---|---|---|---|---|---|---|--|---|---|---|---|---|---|---|---|--|---|---|---|---|---|---|---|---|--|---|---|---|---|---|---|---|---|--|---|---|---|---|---|---|---|---|--|---|---|---|---|---|---|---|---|--|---|---|---|---|---|---|---|---|--|---|---|---|---|---|---|---|---|--|---|---|---|---|---|---|---|---|--|---|---|---|---|---|---|---|---|--|---|---|---|---|---|---|---|---|--|---|---|---|---|---|---|---|---|--|---|---|---|---|---|---|---|---|--|---|---|---|---|---|---|---|---|--|---|---|---|---|---|---|---|---|--|---|---|---|---|---|---|---|---|--|---|---|---|---|---|---|---|---|--|---|---|---|---|---|---|---|---|--|---|---|---|---|---|---|---|---|--|---|---|---|---|---|---|---|---|--|---|---|---|---|---|---|---|---|--|---|---|---|---|---|---|---|---|--|---|---|---|---|---|---|---|---|--|---|---|---|---|---|---|---|---|
| NS1     | <table><tr><th colspan="6">Residue</th></tr><tr><th>N</th><th>60</th><th>544</th><th>545</th><th>630</th><th></th></tr><tr><td>110</td><td>V</td><td>F</td><td>V</td><td>P</td><td></td></tr><tr><td>2</td><td>I</td><td>F</td><td>V</td><td>P</td><td></td></tr><tr><td>1</td><td>V</td><td>Y</td><td>E</td><td>P</td><td></td></tr></table>                                                                                                                                                                                                                                                                                                                                                                                                                                                                                                                                                                                                                                                                                                                                                                                                                                                                                                                                                                                                                                                                                                                                                            | Residue      |     |     |     |     |     | N   | 60 | 544  | 545 | 630 |     | 110 | V   | F   | V   | P   |   | 2     | I | F | V | P |   | 1 | V | Y | E   | P |   | <table><tr><th colspan="5">Residue</th></tr><tr><th>N</th><th>60</th><th>544</th><th>545</th><th>630</th></tr><tr><td>355</td><td>I</td><td>Y</td><td>E</td><td>L</td></tr><tr><td>96</td><td>I</td><td>F</td><td>E</td><td>L</td></tr><tr><td>35</td><td>I</td><td>Y</td><td>Q</td><td>L</td></tr><tr><td>34</td><td>I</td><td>F</td><td>V</td><td>L</td></tr><tr><td>7</td><td>V</td><td>Y</td><td>E</td><td>L</td></tr><tr><td>2</td><td>I</td><td>Y</td><td>K</td><td>L</td></tr><tr><td>1</td><td>V</td><td>F</td><td>E</td><td>L</td></tr><tr><td>1</td><td>I</td><td>F</td><td>Q</td><td>L</td></tr><tr><td>1</td><td>I</td><td>Y</td><td>V</td><td>L</td></tr></table> | Residue |   |   |   |  | N | 60 | 544 | 545 | 630 | 355 | I | Y | E | L | 96 | I | F | E | L | 35 | I | Y | Q | L | 34 | I | F | V | L | 7 | V | Y | E | L | 2 | I | Y | K | L | 1 | V | F | E | L | 1 | I | F | Q | L | 1 | I | Y | V | L |   |   |   |  |   |   |   |   |   |   |   |   |   |   |   |   |   |   |   |   |   |  |   |   |   |   |   |   |   |   |  |   |   |   |   |   |   |   |   |  |   |   |   |   |   |   |   |   |                                                                                                                                                                                                                                                                                                                                                                                                                                                                                                                                                                                                                                                                                                                                                                                                                                                                                                                                                                                                                                                                                                                                                                                                                                                                                                                                                                                                                                                                                                                                                                                                                                                                                                                                                                                                                                                                                                                                                                                                                                                                                                                                                                                                                                                                                                                                                                                                                                                                                                                                                                                                                                                                                                                                                                                                                                                                                                                                                                                                                                                                                                                                                                                                                                                                                                                                                                                                                                                                                                                                                                                                                                                                |         |  |  |  |  |  |  |  |      |  |   |     |     |     |     |     |     |   |       |   |   |   |   |   |   |   |  |    |   |   |   |   |   |   |   |  |   |   |   |   |   |   |   |   |  |   |   |   |   |   |   |   |   |  |   |   |   |   |   |   |   |   |  |   |   |   |   |   |   |   |   |  |   |   |   |   |   |   |   |   |  |   |   |   |   |   |   |   |   |  |   |   |   |   |   |   |   |   |  |   |   |   |   |   |   |   |   |  |   |   |   |   |   |   |   |   |  |   |   |   |   |   |   |   |   |  |   |   |   |   |   |   |   |   |   |       |   |   |   |   |   |   |   |  |     |   |   |   |   |   |   |   |  |    |   |   |   |   |   |   |   |  |    |   |   |   |   |   |   |   |  |    |   |   |   |   |   |   |   |  |    |   |   |   |   |   |   |   |  |    |   |   |   |   |   |   |   |  |   |   |   |   |   |   |   |   |  |   |   |   |   |   |   |   |   |  |   |   |   |   |   |   |   |   |  |   |   |   |   |   |   |   |   |  |   |   |   |   |   |   |   |   |  |   |   |   |   |   |   |   |   |  |   |   |   |   |   |   |   |   |  |   |   |   |   |   |   |   |   |  |   |   |   |   |   |   |   |   |  |   |   |   |   |   |   |   |   |  |   |   |   |   |   |   |   |   |  |   |   |   |   |   |   |   |   |   |     |   |   |   |   |   |   |   |  |   |   |   |   |   |   |   |   |                                                                                                                                                                                                                                                                                                                                                                                                                                                                                                                                                                                                                                                                                                                                                                                                                                                                                                                                                                                                                                                                                                                                                                                                                                                                                                                                                                                                                                                                                                                                                                                                                                                                                                                                                                                                                                                                                                                                                                                                                                                                                                                                                                                                                                                                                                                                                                                                                                                                                                                                                                                                                                                                                                                                                                                                                                                                                                                                                                                                                                                                                                                                                                                                                                                                                                                                                                                                                                                                                                                                                                                                                                                                                                                                                                  |         |  |  |  |  |  |  |  |      |  |   |     |     |     |     |     |     |       |       |   |   |   |   |   |   |   |  |     |   |   |   |   |   |   |   |  |     |   |   |   |   |   |   |   |  |     |   |   |   |   |   |   |   |  |    |   |   |   |   |   |   |   |  |    |   |   |   |   |   |   |   |  |    |   |   |   |   |   |   |   |  |    |   |   |   |   |   |   |   |  |    |   |   |   |   |   |   |   |  |    |   |   |   |   |   |   |   |  |   |   |   |   |   |   |   |   |  |   |   |   |   |   |   |   |   |  |   |   |   |   |   |   |   |   |  |   |   |   |   |   |   |   |   |  |   |   |   |   |   |   |   |   |  |   |   |   |   |   |   |   |   |  |   |   |   |   |   |   |   |   |  |   |   |   |   |   |   |   |   |  |   |   |   |   |   |   |   |   |  |   |   |   |   |   |   |   |   |  |   |   |   |   |   |   |   |   |  |   |   |   |   |   |   |   |   |  |   |   |   |   |   |   |   |   |  |   |   |   |   |   |   |   |   |  |   |   |   |   |   |   |   |   |  |   |   |   |   |   |   |   |   |  |   |   |   |   |   |   |   |   |  |   |   |   |   |   |   |   |   |  |   |   |   |   |   |   |   |   |  |   |   |   |   |   |   |   |   |  |   |   |   |   |   |   |   |   |  |   |   |   |   |   |   |   |   |  |   |   |   |   |   |   |   |   |  |   |   |   |   |   |   |   |   |  |   |   |   |   |   |   |   |   |
| Residue |                                                                                                                                                                                                                                                                                                                                                                                                                                                                                                                                                                                                                                                                                                                                                                                                                                                                                                                                                                                                                                                                                                                                                                                                                                                                                                                                                                                                                                                                                                          |              |     |     |     |     |     |     |    |      |     |     |     |     |     |     |     |     |   |       |   |   |   |   |   |   |   |   |     |   |   |                                                                                                                                                                                                                                                                                                                                                                                                                                                                                                                                                                                                                                                                                |         |   |   |   |  |   |    |     |     |     |     |   |   |   |   |    |   |   |   |   |    |   |   |   |   |    |   |   |   |   |   |   |   |   |   |   |   |   |   |   |   |   |   |   |   |   |   |   |   |   |   |   |   |   |   |   |   |   |  |   |   |   |   |   |   |   |   |   |   |   |   |   |   |   |   |   |  |   |   |   |   |   |   |   |   |  |   |   |   |   |   |   |   |   |  |   |   |   |   |   |   |   |   |                                                                                                                                                                                                                                                                                                                                                                                                                                                                                                                                                                                                                                                                                                                                                                                                                                                                                                                                                                                                                                                                                                                                                                                                                                                                                                                                                                                                                                                                                                                                                                                                                                                                                                                                                                                                                                                                                                                                                                                                                                                                                                                                                                                                                                                                                                                                                                                                                                                                                                                                                                                                                                                                                                                                                                                                                                                                                                                                                                                                                                                                                                                                                                                                                                                                                                                                                                                                                                                                                                                                                                                                                                                                |         |  |  |  |  |  |  |  |      |  |   |     |     |     |     |     |     |   |       |   |   |   |   |   |   |   |  |    |   |   |   |   |   |   |   |  |   |   |   |   |   |   |   |   |  |   |   |   |   |   |   |   |   |  |   |   |   |   |   |   |   |   |  |   |   |   |   |   |   |   |   |  |   |   |   |   |   |   |   |   |  |   |   |   |   |   |   |   |   |  |   |   |   |   |   |   |   |   |  |   |   |   |   |   |   |   |   |  |   |   |   |   |   |   |   |   |  |   |   |   |   |   |   |   |   |  |   |   |   |   |   |   |   |   |   |       |   |   |   |   |   |   |   |  |     |   |   |   |   |   |   |   |  |    |   |   |   |   |   |   |   |  |    |   |   |   |   |   |   |   |  |    |   |   |   |   |   |   |   |  |    |   |   |   |   |   |   |   |  |    |   |   |   |   |   |   |   |  |   |   |   |   |   |   |   |   |  |   |   |   |   |   |   |   |   |  |   |   |   |   |   |   |   |   |  |   |   |   |   |   |   |   |   |  |   |   |   |   |   |   |   |   |  |   |   |   |   |   |   |   |   |  |   |   |   |   |   |   |   |   |  |   |   |   |   |   |   |   |   |  |   |   |   |   |   |   |   |   |  |   |   |   |   |   |   |   |   |  |   |   |   |   |   |   |   |   |  |   |   |   |   |   |   |   |   |   |     |   |   |   |   |   |   |   |  |   |   |   |   |   |   |   |   |                                                                                                                                                                                                                                                                                                                                                                                                                                                                                                                                                                                                                                                                                                                                                                                                                                                                                                                                                                                                                                                                                                                                                                                                                                                                                                                                                                                                                                                                                                                                                                                                                                                                                                                                                                                                                                                                                                                                                                                                                                                                                                                                                                                                                                                                                                                                                                                                                                                                                                                                                                                                                                                                                                                                                                                                                                                                                                                                                                                                                                                                                                                                                                                                                                                                                                                                                                                                                                                                                                                                                                                                                                                                                                                                                                  |         |  |  |  |  |  |  |  |      |  |   |     |     |     |     |     |     |       |       |   |   |   |   |   |   |   |  |     |   |   |   |   |   |   |   |  |     |   |   |   |   |   |   |   |  |     |   |   |   |   |   |   |   |  |    |   |   |   |   |   |   |   |  |    |   |   |   |   |   |   |   |  |    |   |   |   |   |   |   |   |  |    |   |   |   |   |   |   |   |  |    |   |   |   |   |   |   |   |  |    |   |   |   |   |   |   |   |  |   |   |   |   |   |   |   |   |  |   |   |   |   |   |   |   |   |  |   |   |   |   |   |   |   |   |  |   |   |   |   |   |   |   |   |  |   |   |   |   |   |   |   |   |  |   |   |   |   |   |   |   |   |  |   |   |   |   |   |   |   |   |  |   |   |   |   |   |   |   |   |  |   |   |   |   |   |   |   |   |  |   |   |   |   |   |   |   |   |  |   |   |   |   |   |   |   |   |  |   |   |   |   |   |   |   |   |  |   |   |   |   |   |   |   |   |  |   |   |   |   |   |   |   |   |  |   |   |   |   |   |   |   |   |  |   |   |   |   |   |   |   |   |  |   |   |   |   |   |   |   |   |  |   |   |   |   |   |   |   |   |  |   |   |   |   |   |   |   |   |  |   |   |   |   |   |   |   |   |  |   |   |   |   |   |   |   |   |  |   |   |   |   |   |   |   |   |  |   |   |   |   |   |   |   |   |  |   |   |   |   |   |   |   |   |  |   |   |   |   |   |   |   |   |
| N       | 60                                                                                                                                                                                                                                                                                                                                                                                                                                                                                                                                                                                                                                                                                                                                                                                                                                                                                                                                                                                                                                                                                                                                                                                                                                                                                                                                                                                                                                                                                                       | 544          | 545 | 630 |     |     |     |     |    |      |     |     |     |     |     |     |     |     |   |       |   |   |   |   |   |   |   |   |     |   |   |                                                                                                                                                                                                                                                                                                                                                                                                                                                                                                                                                                                                                                                                                |         |   |   |   |  |   |    |     |     |     |     |   |   |   |   |    |   |   |   |   |    |   |   |   |   |    |   |   |   |   |   |   |   |   |   |   |   |   |   |   |   |   |   |   |   |   |   |   |   |   |   |   |   |   |   |   |   |   |  |   |   |   |   |   |   |   |   |   |   |   |   |   |   |   |   |   |  |   |   |   |   |   |   |   |   |  |   |   |   |   |   |   |   |   |  |   |   |   |   |   |   |   |   |                                                                                                                                                                                                                                                                                                                                                                                                                                                                                                                                                                                                                                                                                                                                                                                                                                                                                                                                                                                                                                                                                                                                                                                                                                                                                                                                                                                                                                                                                                                                                                                                                                                                                                                                                                                                                                                                                                                                                                                                                                                                                                                                                                                                                                                                                                                                                                                                                                                                                                                                                                                                                                                                                                                                                                                                                                                                                                                                                                                                                                                                                                                                                                                                                                                                                                                                                                                                                                                                                                                                                                                                                                                                |         |  |  |  |  |  |  |  |      |  |   |     |     |     |     |     |     |   |       |   |   |   |   |   |   |   |  |    |   |   |   |   |   |   |   |  |   |   |   |   |   |   |   |   |  |   |   |   |   |   |   |   |   |  |   |   |   |   |   |   |   |   |  |   |   |   |   |   |   |   |   |  |   |   |   |   |   |   |   |   |  |   |   |   |   |   |   |   |   |  |   |   |   |   |   |   |   |   |  |   |   |   |   |   |   |   |   |  |   |   |   |   |   |   |   |   |  |   |   |   |   |   |   |   |   |  |   |   |   |   |   |   |   |   |   |       |   |   |   |   |   |   |   |  |     |   |   |   |   |   |   |   |  |    |   |   |   |   |   |   |   |  |    |   |   |   |   |   |   |   |  |    |   |   |   |   |   |   |   |  |    |   |   |   |   |   |   |   |  |    |   |   |   |   |   |   |   |  |   |   |   |   |   |   |   |   |  |   |   |   |   |   |   |   |   |  |   |   |   |   |   |   |   |   |  |   |   |   |   |   |   |   |   |  |   |   |   |   |   |   |   |   |  |   |   |   |   |   |   |   |   |  |   |   |   |   |   |   |   |   |  |   |   |   |   |   |   |   |   |  |   |   |   |   |   |   |   |   |  |   |   |   |   |   |   |   |   |  |   |   |   |   |   |   |   |   |  |   |   |   |   |   |   |   |   |   |     |   |   |   |   |   |   |   |  |   |   |   |   |   |   |   |   |                                                                                                                                                                                                                                                                                                                                                                                                                                                                                                                                                                                                                                                                                                                                                                                                                                                                                                                                                                                                                                                                                                                                                                                                                                                                                                                                                                                                                                                                                                                                                                                                                                                                                                                                                                                                                                                                                                                                                                                                                                                                                                                                                                                                                                                                                                                                                                                                                                                                                                                                                                                                                                                                                                                                                                                                                                                                                                                                                                                                                                                                                                                                                                                                                                                                                                                                                                                                                                                                                                                                                                                                                                                                                                                                                                  |         |  |  |  |  |  |  |  |      |  |   |     |     |     |     |     |     |       |       |   |   |   |   |   |   |   |  |     |   |   |   |   |   |   |   |  |     |   |   |   |   |   |   |   |  |     |   |   |   |   |   |   |   |  |    |   |   |   |   |   |   |   |  |    |   |   |   |   |   |   |   |  |    |   |   |   |   |   |   |   |  |    |   |   |   |   |   |   |   |  |    |   |   |   |   |   |   |   |  |    |   |   |   |   |   |   |   |  |   |   |   |   |   |   |   |   |  |   |   |   |   |   |   |   |   |  |   |   |   |   |   |   |   |   |  |   |   |   |   |   |   |   |   |  |   |   |   |   |   |   |   |   |  |   |   |   |   |   |   |   |   |  |   |   |   |   |   |   |   |   |  |   |   |   |   |   |   |   |   |  |   |   |   |   |   |   |   |   |  |   |   |   |   |   |   |   |   |  |   |   |   |   |   |   |   |   |  |   |   |   |   |   |   |   |   |  |   |   |   |   |   |   |   |   |  |   |   |   |   |   |   |   |   |  |   |   |   |   |   |   |   |   |  |   |   |   |   |   |   |   |   |  |   |   |   |   |   |   |   |   |  |   |   |   |   |   |   |   |   |  |   |   |   |   |   |   |   |   |  |   |   |   |   |   |   |   |   |  |   |   |   |   |   |   |   |   |  |   |   |   |   |   |   |   |   |  |   |   |   |   |   |   |   |   |  |   |   |   |   |   |   |   |   |  |   |   |   |   |   |   |   |   |
| 110     | V                                                                                                                                                                                                                                                                                                                                                                                                                                                                                                                                                                                                                                                                                                                                                                                                                                                                                                                                                                                                                                                                                                                                                                                                                                                                                                                                                                                                                                                                                                        | F            | V   | P   |     |     |     |     |    |      |     |     |     |     |     |     |     |     |   |       |   |   |   |   |   |   |   |   |     |   |   |                                                                                                                                                                                                                                                                                                                                                                                                                                                                                                                                                                                                                                                                                |         |   |   |   |  |   |    |     |     |     |     |   |   |   |   |    |   |   |   |   |    |   |   |   |   |    |   |   |   |   |   |   |   |   |   |   |   |   |   |   |   |   |   |   |   |   |   |   |   |   |   |   |   |   |   |   |   |   |  |   |   |   |   |   |   |   |   |   |   |   |   |   |   |   |   |   |  |   |   |   |   |   |   |   |   |  |   |   |   |   |   |   |   |   |  |   |   |   |   |   |   |   |   |                                                                                                                                                                                                                                                                                                                                                                                                                                                                                                                                                                                                                                                                                                                                                                                                                                                                                                                                                                                                                                                                                                                                                                                                                                                                                                                                                                                                                                                                                                                                                                                                                                                                                                                                                                                                                                                                                                                                                                                                                                                                                                                                                                                                                                                                                                                                                                                                                                                                                                                                                                                                                                                                                                                                                                                                                                                                                                                                                                                                                                                                                                                                                                                                                                                                                                                                                                                                                                                                                                                                                                                                                                                                |         |  |  |  |  |  |  |  |      |  |   |     |     |     |     |     |     |   |       |   |   |   |   |   |   |   |  |    |   |   |   |   |   |   |   |  |   |   |   |   |   |   |   |   |  |   |   |   |   |   |   |   |   |  |   |   |   |   |   |   |   |   |  |   |   |   |   |   |   |   |   |  |   |   |   |   |   |   |   |   |  |   |   |   |   |   |   |   |   |  |   |   |   |   |   |   |   |   |  |   |   |   |   |   |   |   |   |  |   |   |   |   |   |   |   |   |  |   |   |   |   |   |   |   |   |  |   |   |   |   |   |   |   |   |   |       |   |   |   |   |   |   |   |  |     |   |   |   |   |   |   |   |  |    |   |   |   |   |   |   |   |  |    |   |   |   |   |   |   |   |  |    |   |   |   |   |   |   |   |  |    |   |   |   |   |   |   |   |  |    |   |   |   |   |   |   |   |  |   |   |   |   |   |   |   |   |  |   |   |   |   |   |   |   |   |  |   |   |   |   |   |   |   |   |  |   |   |   |   |   |   |   |   |  |   |   |   |   |   |   |   |   |  |   |   |   |   |   |   |   |   |  |   |   |   |   |   |   |   |   |  |   |   |   |   |   |   |   |   |  |   |   |   |   |   |   |   |   |  |   |   |   |   |   |   |   |   |  |   |   |   |   |   |   |   |   |  |   |   |   |   |   |   |   |   |   |     |   |   |   |   |   |   |   |  |   |   |   |   |   |   |   |   |                                                                                                                                                                                                                                                                                                                                                                                                                                                                                                                                                                                                                                                                                                                                                                                                                                                                                                                                                                                                                                                                                                                                                                                                                                                                                                                                                                                                                                                                                                                                                                                                                                                                                                                                                                                                                                                                                                                                                                                                                                                                                                                                                                                                                                                                                                                                                                                                                                                                                                                                                                                                                                                                                                                                                                                                                                                                                                                                                                                                                                                                                                                                                                                                                                                                                                                                                                                                                                                                                                                                                                                                                                                                                                                                                                  |         |  |  |  |  |  |  |  |      |  |   |     |     |     |     |     |     |       |       |   |   |   |   |   |   |   |  |     |   |   |   |   |   |   |   |  |     |   |   |   |   |   |   |   |  |     |   |   |   |   |   |   |   |  |    |   |   |   |   |   |   |   |  |    |   |   |   |   |   |   |   |  |    |   |   |   |   |   |   |   |  |    |   |   |   |   |   |   |   |  |    |   |   |   |   |   |   |   |  |    |   |   |   |   |   |   |   |  |   |   |   |   |   |   |   |   |  |   |   |   |   |   |   |   |   |  |   |   |   |   |   |   |   |   |  |   |   |   |   |   |   |   |   |  |   |   |   |   |   |   |   |   |  |   |   |   |   |   |   |   |   |  |   |   |   |   |   |   |   |   |  |   |   |   |   |   |   |   |   |  |   |   |   |   |   |   |   |   |  |   |   |   |   |   |   |   |   |  |   |   |   |   |   |   |   |   |  |   |   |   |   |   |   |   |   |  |   |   |   |   |   |   |   |   |  |   |   |   |   |   |   |   |   |  |   |   |   |   |   |   |   |   |  |   |   |   |   |   |   |   |   |  |   |   |   |   |   |   |   |   |  |   |   |   |   |   |   |   |   |  |   |   |   |   |   |   |   |   |  |   |   |   |   |   |   |   |   |  |   |   |   |   |   |   |   |   |  |   |   |   |   |   |   |   |   |  |   |   |   |   |   |   |   |   |  |   |   |   |   |   |   |   |   |  |   |   |   |   |   |   |   |   |
| 2       | I                                                                                                                                                                                                                                                                                                                                                                                                                                                                                                                                                                                                                                                                                                                                                                                                                                                                                                                                                                                                                                                                                                                                                                                                                                                                                                                                                                                                                                                                                                        | F            | V   | P   |     |     |     |     |    |      |     |     |     |     |     |     |     |     |   |       |   |   |   |   |   |   |   |   |     |   |   |                                                                                                                                                                                                                                                                                                                                                                                                                                                                                                                                                                                                                                                                                |         |   |   |   |  |   |    |     |     |     |     |   |   |   |   |    |   |   |   |   |    |   |   |   |   |    |   |   |   |   |   |   |   |   |   |   |   |   |   |   |   |   |   |   |   |   |   |   |   |   |   |   |   |   |   |   |   |   |  |   |   |   |   |   |   |   |   |   |   |   |   |   |   |   |   |   |  |   |   |   |   |   |   |   |   |  |   |   |   |   |   |   |   |   |  |   |   |   |   |   |   |   |   |                                                                                                                                                                                                                                                                                                                                                                                                                                                                                                                                                                                                                                                                                                                                                                                                                                                                                                                                                                                                                                                                                                                                                                                                                                                                                                                                                                                                                                                                                                                                                                                                                                                                                                                                                                                                                                                                                                                                                                                                                                                                                                                                                                                                                                                                                                                                                                                                                                                                                                                                                                                                                                                                                                                                                                                                                                                                                                                                                                                                                                                                                                                                                                                                                                                                                                                                                                                                                                                                                                                                                                                                                                                                |         |  |  |  |  |  |  |  |      |  |   |     |     |     |     |     |     |   |       |   |   |   |   |   |   |   |  |    |   |   |   |   |   |   |   |  |   |   |   |   |   |   |   |   |  |   |   |   |   |   |   |   |   |  |   |   |   |   |   |   |   |   |  |   |   |   |   |   |   |   |   |  |   |   |   |   |   |   |   |   |  |   |   |   |   |   |   |   |   |  |   |   |   |   |   |   |   |   |  |   |   |   |   |   |   |   |   |  |   |   |   |   |   |   |   |   |  |   |   |   |   |   |   |   |   |  |   |   |   |   |   |   |   |   |   |       |   |   |   |   |   |   |   |  |     |   |   |   |   |   |   |   |  |    |   |   |   |   |   |   |   |  |    |   |   |   |   |   |   |   |  |    |   |   |   |   |   |   |   |  |    |   |   |   |   |   |   |   |  |    |   |   |   |   |   |   |   |  |   |   |   |   |   |   |   |   |  |   |   |   |   |   |   |   |   |  |   |   |   |   |   |   |   |   |  |   |   |   |   |   |   |   |   |  |   |   |   |   |   |   |   |   |  |   |   |   |   |   |   |   |   |  |   |   |   |   |   |   |   |   |  |   |   |   |   |   |   |   |   |  |   |   |   |   |   |   |   |   |  |   |   |   |   |   |   |   |   |  |   |   |   |   |   |   |   |   |  |   |   |   |   |   |   |   |   |   |     |   |   |   |   |   |   |   |  |   |   |   |   |   |   |   |   |                                                                                                                                                                                                                                                                                                                                                                                                                                                                                                                                                                                                                                                                                                                                                                                                                                                                                                                                                                                                                                                                                                                                                                                                                                                                                                                                                                                                                                                                                                                                                                                                                                                                                                                                                                                                                                                                                                                                                                                                                                                                                                                                                                                                                                                                                                                                                                                                                                                                                                                                                                                                                                                                                                                                                                                                                                                                                                                                                                                                                                                                                                                                                                                                                                                                                                                                                                                                                                                                                                                                                                                                                                                                                                                                                                  |         |  |  |  |  |  |  |  |      |  |   |     |     |     |     |     |     |       |       |   |   |   |   |   |   |   |  |     |   |   |   |   |   |   |   |  |     |   |   |   |   |   |   |   |  |     |   |   |   |   |   |   |   |  |    |   |   |   |   |   |   |   |  |    |   |   |   |   |   |   |   |  |    |   |   |   |   |   |   |   |  |    |   |   |   |   |   |   |   |  |    |   |   |   |   |   |   |   |  |    |   |   |   |   |   |   |   |  |   |   |   |   |   |   |   |   |  |   |   |   |   |   |   |   |   |  |   |   |   |   |   |   |   |   |  |   |   |   |   |   |   |   |   |  |   |   |   |   |   |   |   |   |  |   |   |   |   |   |   |   |   |  |   |   |   |   |   |   |   |   |  |   |   |   |   |   |   |   |   |  |   |   |   |   |   |   |   |   |  |   |   |   |   |   |   |   |   |  |   |   |   |   |   |   |   |   |  |   |   |   |   |   |   |   |   |  |   |   |   |   |   |   |   |   |  |   |   |   |   |   |   |   |   |  |   |   |   |   |   |   |   |   |  |   |   |   |   |   |   |   |   |  |   |   |   |   |   |   |   |   |  |   |   |   |   |   |   |   |   |  |   |   |   |   |   |   |   |   |  |   |   |   |   |   |   |   |   |  |   |   |   |   |   |   |   |   |  |   |   |   |   |   |   |   |   |  |   |   |   |   |   |   |   |   |  |   |   |   |   |   |   |   |   |  |   |   |   |   |   |   |   |   |
| 1       | V                                                                                                                                                                                                                                                                                                                                                                                                                                                                                                                                                                                                                                                                                                                                                                                                                                                                                                                                                                                                                                                                                                                                                                                                                                                                                                                                                                                                                                                                                                        | Y            | E   | P   |     |     |     |     |    |      |     |     |     |     |     |     |     |     |   |       |   |   |   |   |   |   |   |   |     |   |   |                                                                                                                                                                                                                                                                                                                                                                                                                                                                                                                                                                                                                                                                                |         |   |   |   |  |   |    |     |     |     |     |   |   |   |   |    |   |   |   |   |    |   |   |   |   |    |   |   |   |   |   |   |   |   |   |   |   |   |   |   |   |   |   |   |   |   |   |   |   |   |   |   |   |   |   |   |   |   |  |   |   |   |   |   |   |   |   |   |   |   |   |   |   |   |   |   |  |   |   |   |   |   |   |   |   |  |   |   |   |   |   |   |   |   |  |   |   |   |   |   |   |   |   |                                                                                                                                                                                                                                                                                                                                                                                                                                                                                                                                                                                                                                                                                                                                                                                                                                                                                                                                                                                                                                                                                                                                                                                                                                                                                                                                                                                                                                                                                                                                                                                                                                                                                                                                                                                                                                                                                                                                                                                                                                                                                                                                                                                                                                                                                                                                                                                                                                                                                                                                                                                                                                                                                                                                                                                                                                                                                                                                                                                                                                                                                                                                                                                                                                                                                                                                                                                                                                                                                                                                                                                                                                                                |         |  |  |  |  |  |  |  |      |  |   |     |     |     |     |     |     |   |       |   |   |   |   |   |   |   |  |    |   |   |   |   |   |   |   |  |   |   |   |   |   |   |   |   |  |   |   |   |   |   |   |   |   |  |   |   |   |   |   |   |   |   |  |   |   |   |   |   |   |   |   |  |   |   |   |   |   |   |   |   |  |   |   |   |   |   |   |   |   |  |   |   |   |   |   |   |   |   |  |   |   |   |   |   |   |   |   |  |   |   |   |   |   |   |   |   |  |   |   |   |   |   |   |   |   |  |   |   |   |   |   |   |   |   |   |       |   |   |   |   |   |   |   |  |     |   |   |   |   |   |   |   |  |    |   |   |   |   |   |   |   |  |    |   |   |   |   |   |   |   |  |    |   |   |   |   |   |   |   |  |    |   |   |   |   |   |   |   |  |    |   |   |   |   |   |   |   |  |   |   |   |   |   |   |   |   |  |   |   |   |   |   |   |   |   |  |   |   |   |   |   |   |   |   |  |   |   |   |   |   |   |   |   |  |   |   |   |   |   |   |   |   |  |   |   |   |   |   |   |   |   |  |   |   |   |   |   |   |   |   |  |   |   |   |   |   |   |   |   |  |   |   |   |   |   |   |   |   |  |   |   |   |   |   |   |   |   |  |   |   |   |   |   |   |   |   |  |   |   |   |   |   |   |   |   |   |     |   |   |   |   |   |   |   |  |   |   |   |   |   |   |   |   |                                                                                                                                                                                                                                                                                                                                                                                                                                                                                                                                                                                                                                                                                                                                                                                                                                                                                                                                                                                                                                                                                                                                                                                                                                                                                                                                                                                                                                                                                                                                                                                                                                                                                                                                                                                                                                                                                                                                                                                                                                                                                                                                                                                                                                                                                                                                                                                                                                                                                                                                                                                                                                                                                                                                                                                                                                                                                                                                                                                                                                                                                                                                                                                                                                                                                                                                                                                                                                                                                                                                                                                                                                                                                                                                                                  |         |  |  |  |  |  |  |  |      |  |   |     |     |     |     |     |     |       |       |   |   |   |   |   |   |   |  |     |   |   |   |   |   |   |   |  |     |   |   |   |   |   |   |   |  |     |   |   |   |   |   |   |   |  |    |   |   |   |   |   |   |   |  |    |   |   |   |   |   |   |   |  |    |   |   |   |   |   |   |   |  |    |   |   |   |   |   |   |   |  |    |   |   |   |   |   |   |   |  |    |   |   |   |   |   |   |   |  |   |   |   |   |   |   |   |   |  |   |   |   |   |   |   |   |   |  |   |   |   |   |   |   |   |   |  |   |   |   |   |   |   |   |   |  |   |   |   |   |   |   |   |   |  |   |   |   |   |   |   |   |   |  |   |   |   |   |   |   |   |   |  |   |   |   |   |   |   |   |   |  |   |   |   |   |   |   |   |   |  |   |   |   |   |   |   |   |   |  |   |   |   |   |   |   |   |   |  |   |   |   |   |   |   |   |   |  |   |   |   |   |   |   |   |   |  |   |   |   |   |   |   |   |   |  |   |   |   |   |   |   |   |   |  |   |   |   |   |   |   |   |   |  |   |   |   |   |   |   |   |   |  |   |   |   |   |   |   |   |   |  |   |   |   |   |   |   |   |   |  |   |   |   |   |   |   |   |   |  |   |   |   |   |   |   |   |   |  |   |   |   |   |   |   |   |   |  |   |   |   |   |   |   |   |   |  |   |   |   |   |   |   |   |   |  |   |   |   |   |   |   |   |   |
| Residue |                                                                                                                                                                                                                                                                                                                                                                                                                                                                                                                                                                                                                                                                                                                                                                                                                                                                                                                                                                                                                                                                                                                                                                                                                                                                                                                                                                                                                                                                                                          |              |     |     |     |     |     |     |    |      |     |     |     |     |     |     |     |     |   |       |   |   |   |   |   |   |   |   |     |   |   |                                                                                                                                                                                                                                                                                                                                                                                                                                                                                                                                                                                                                                                                                |         |   |   |   |  |   |    |     |     |     |     |   |   |   |   |    |   |   |   |   |    |   |   |   |   |    |   |   |   |   |   |   |   |   |   |   |   |   |   |   |   |   |   |   |   |   |   |   |   |   |   |   |   |   |   |   |   |   |  |   |   |   |   |   |   |   |   |   |   |   |   |   |   |   |   |   |  |   |   |   |   |   |   |   |   |  |   |   |   |   |   |   |   |   |  |   |   |   |   |   |   |   |   |                                                                                                                                                                                                                                                                                                                                                                                                                                                                                                                                                                                                                                                                                                                                                                                                                                                                                                                                                                                                                                                                                                                                                                                                                                                                                                                                                                                                                                                                                                                                                                                                                                                                                                                                                                                                                                                                                                                                                                                                                                                                                                                                                                                                                                                                                                                                                                                                                                                                                                                                                                                                                                                                                                                                                                                                                                                                                                                                                                                                                                                                                                                                                                                                                                                                                                                                                                                                                                                                                                                                                                                                                                                                |         |  |  |  |  |  |  |  |      |  |   |     |     |     |     |     |     |   |       |   |   |   |   |   |   |   |  |    |   |   |   |   |   |   |   |  |   |   |   |   |   |   |   |   |  |   |   |   |   |   |   |   |   |  |   |   |   |   |   |   |   |   |  |   |   |   |   |   |   |   |   |  |   |   |   |   |   |   |   |   |  |   |   |   |   |   |   |   |   |  |   |   |   |   |   |   |   |   |  |   |   |   |   |   |   |   |   |  |   |   |   |   |   |   |   |   |  |   |   |   |   |   |   |   |   |  |   |   |   |   |   |   |   |   |   |       |   |   |   |   |   |   |   |  |     |   |   |   |   |   |   |   |  |    |   |   |   |   |   |   |   |  |    |   |   |   |   |   |   |   |  |    |   |   |   |   |   |   |   |  |    |   |   |   |   |   |   |   |  |    |   |   |   |   |   |   |   |  |   |   |   |   |   |   |   |   |  |   |   |   |   |   |   |   |   |  |   |   |   |   |   |   |   |   |  |   |   |   |   |   |   |   |   |  |   |   |   |   |   |   |   |   |  |   |   |   |   |   |   |   |   |  |   |   |   |   |   |   |   |   |  |   |   |   |   |   |   |   |   |  |   |   |   |   |   |   |   |   |  |   |   |   |   |   |   |   |   |  |   |   |   |   |   |   |   |   |  |   |   |   |   |   |   |   |   |   |     |   |   |   |   |   |   |   |  |   |   |   |   |   |   |   |   |                                                                                                                                                                                                                                                                                                                                                                                                                                                                                                                                                                                                                                                                                                                                                                                                                                                                                                                                                                                                                                                                                                                                                                                                                                                                                                                                                                                                                                                                                                                                                                                                                                                                                                                                                                                                                                                                                                                                                                                                                                                                                                                                                                                                                                                                                                                                                                                                                                                                                                                                                                                                                                                                                                                                                                                                                                                                                                                                                                                                                                                                                                                                                                                                                                                                                                                                                                                                                                                                                                                                                                                                                                                                                                                                                                  |         |  |  |  |  |  |  |  |      |  |   |     |     |     |     |     |     |       |       |   |   |   |   |   |   |   |  |     |   |   |   |   |   |   |   |  |     |   |   |   |   |   |   |   |  |     |   |   |   |   |   |   |   |  |    |   |   |   |   |   |   |   |  |    |   |   |   |   |   |   |   |  |    |   |   |   |   |   |   |   |  |    |   |   |   |   |   |   |   |  |    |   |   |   |   |   |   |   |  |    |   |   |   |   |   |   |   |  |   |   |   |   |   |   |   |   |  |   |   |   |   |   |   |   |   |  |   |   |   |   |   |   |   |   |  |   |   |   |   |   |   |   |   |  |   |   |   |   |   |   |   |   |  |   |   |   |   |   |   |   |   |  |   |   |   |   |   |   |   |   |  |   |   |   |   |   |   |   |   |  |   |   |   |   |   |   |   |   |  |   |   |   |   |   |   |   |   |  |   |   |   |   |   |   |   |   |  |   |   |   |   |   |   |   |   |  |   |   |   |   |   |   |   |   |  |   |   |   |   |   |   |   |   |  |   |   |   |   |   |   |   |   |  |   |   |   |   |   |   |   |   |  |   |   |   |   |   |   |   |   |  |   |   |   |   |   |   |   |   |  |   |   |   |   |   |   |   |   |  |   |   |   |   |   |   |   |   |  |   |   |   |   |   |   |   |   |  |   |   |   |   |   |   |   |   |  |   |   |   |   |   |   |   |   |  |   |   |   |   |   |   |   |   |  |   |   |   |   |   |   |   |   |
| N       | 60                                                                                                                                                                                                                                                                                                                                                                                                                                                                                                                                                                                                                                                                                                                                                                                                                                                                                                                                                                                                                                                                                                                                                                                                                                                                                                                                                                                                                                                                                                       | 544          | 545 | 630 |     |     |     |     |    |      |     |     |     |     |     |     |     |     |   |       |   |   |   |   |   |   |   |   |     |   |   |                                                                                                                                                                                                                                                                                                                                                                                                                                                                                                                                                                                                                                                                                |         |   |   |   |  |   |    |     |     |     |     |   |   |   |   |    |   |   |   |   |    |   |   |   |   |    |   |   |   |   |   |   |   |   |   |   |   |   |   |   |   |   |   |   |   |   |   |   |   |   |   |   |   |   |   |   |   |   |  |   |   |   |   |   |   |   |   |   |   |   |   |   |   |   |   |   |  |   |   |   |   |   |   |   |   |  |   |   |   |   |   |   |   |   |  |   |   |   |   |   |   |   |   |                                                                                                                                                                                                                                                                                                                                                                                                                                                                                                                                                                                                                                                                                                                                                                                                                                                                                                                                                                                                                                                                                                                                                                                                                                                                                                                                                                                                                                                                                                                                                                                                                                                                                                                                                                                                                                                                                                                                                                                                                                                                                                                                                                                                                                                                                                                                                                                                                                                                                                                                                                                                                                                                                                                                                                                                                                                                                                                                                                                                                                                                                                                                                                                                                                                                                                                                                                                                                                                                                                                                                                                                                                                                |         |  |  |  |  |  |  |  |      |  |   |     |     |     |     |     |     |   |       |   |   |   |   |   |   |   |  |    |   |   |   |   |   |   |   |  |   |   |   |   |   |   |   |   |  |   |   |   |   |   |   |   |   |  |   |   |   |   |   |   |   |   |  |   |   |   |   |   |   |   |   |  |   |   |   |   |   |   |   |   |  |   |   |   |   |   |   |   |   |  |   |   |   |   |   |   |   |   |  |   |   |   |   |   |   |   |   |  |   |   |   |   |   |   |   |   |  |   |   |   |   |   |   |   |   |  |   |   |   |   |   |   |   |   |   |       |   |   |   |   |   |   |   |  |     |   |   |   |   |   |   |   |  |    |   |   |   |   |   |   |   |  |    |   |   |   |   |   |   |   |  |    |   |   |   |   |   |   |   |  |    |   |   |   |   |   |   |   |  |    |   |   |   |   |   |   |   |  |   |   |   |   |   |   |   |   |  |   |   |   |   |   |   |   |   |  |   |   |   |   |   |   |   |   |  |   |   |   |   |   |   |   |   |  |   |   |   |   |   |   |   |   |  |   |   |   |   |   |   |   |   |  |   |   |   |   |   |   |   |   |  |   |   |   |   |   |   |   |   |  |   |   |   |   |   |   |   |   |  |   |   |   |   |   |   |   |   |  |   |   |   |   |   |   |   |   |  |   |   |   |   |   |   |   |   |   |     |   |   |   |   |   |   |   |  |   |   |   |   |   |   |   |   |                                                                                                                                                                                                                                                                                                                                                                                                                                                                                                                                                                                                                                                                                                                                                                                                                                                                                                                                                                                                                                                                                                                                                                                                                                                                                                                                                                                                                                                                                                                                                                                                                                                                                                                                                                                                                                                                                                                                                                                                                                                                                                                                                                                                                                                                                                                                                                                                                                                                                                                                                                                                                                                                                                                                                                                                                                                                                                                                                                                                                                                                                                                                                                                                                                                                                                                                                                                                                                                                                                                                                                                                                                                                                                                                                                  |         |  |  |  |  |  |  |  |      |  |   |     |     |     |     |     |     |       |       |   |   |   |   |   |   |   |  |     |   |   |   |   |   |   |   |  |     |   |   |   |   |   |   |   |  |     |   |   |   |   |   |   |   |  |    |   |   |   |   |   |   |   |  |    |   |   |   |   |   |   |   |  |    |   |   |   |   |   |   |   |  |    |   |   |   |   |   |   |   |  |    |   |   |   |   |   |   |   |  |    |   |   |   |   |   |   |   |  |   |   |   |   |   |   |   |   |  |   |   |   |   |   |   |   |   |  |   |   |   |   |   |   |   |   |  |   |   |   |   |   |   |   |   |  |   |   |   |   |   |   |   |   |  |   |   |   |   |   |   |   |   |  |   |   |   |   |   |   |   |   |  |   |   |   |   |   |   |   |   |  |   |   |   |   |   |   |   |   |  |   |   |   |   |   |   |   |   |  |   |   |   |   |   |   |   |   |  |   |   |   |   |   |   |   |   |  |   |   |   |   |   |   |   |   |  |   |   |   |   |   |   |   |   |  |   |   |   |   |   |   |   |   |  |   |   |   |   |   |   |   |   |  |   |   |   |   |   |   |   |   |  |   |   |   |   |   |   |   |   |  |   |   |   |   |   |   |   |   |  |   |   |   |   |   |   |   |   |  |   |   |   |   |   |   |   |   |  |   |   |   |   |   |   |   |   |  |   |   |   |   |   |   |   |   |  |   |   |   |   |   |   |   |   |  |   |   |   |   |   |   |   |   |
| 355     | I                                                                                                                                                                                                                                                                                                                                                                                                                                                                                                                                                                                                                                                                                                                                                                                                                                                                                                                                                                                                                                                                                                                                                                                                                                                                                                                                                                                                                                                                                                        | Y            | E   | L   |     |     |     |     |    |      |     |     |     |     |     |     |     |     |   |       |   |   |   |   |   |   |   |   |     |   |   |                                                                                                                                                                                                                                                                                                                                                                                                                                                                                                                                                                                                                                                                                |         |   |   |   |  |   |    |     |     |     |     |   |   |   |   |    |   |   |   |   |    |   |   |   |   |    |   |   |   |   |   |   |   |   |   |   |   |   |   |   |   |   |   |   |   |   |   |   |   |   |   |   |   |   |   |   |   |   |  |   |   |   |   |   |   |   |   |   |   |   |   |   |   |   |   |   |  |   |   |   |   |   |   |   |   |  |   |   |   |   |   |   |   |   |  |   |   |   |   |   |   |   |   |                                                                                                                                                                                                                                                                                                                                                                                                                                                                                                                                                                                                                                                                                                                                                                                                                                                                                                                                                                                                                                                                                                                                                                                                                                                                                                                                                                                                                                                                                                                                                                                                                                                                                                                                                                                                                                                                                                                                                                                                                                                                                                                                                                                                                                                                                                                                                                                                                                                                                                                                                                                                                                                                                                                                                                                                                                                                                                                                                                                                                                                                                                                                                                                                                                                                                                                                                                                                                                                                                                                                                                                                                                                                |         |  |  |  |  |  |  |  |      |  |   |     |     |     |     |     |     |   |       |   |   |   |   |   |   |   |  |    |   |   |   |   |   |   |   |  |   |   |   |   |   |   |   |   |  |   |   |   |   |   |   |   |   |  |   |   |   |   |   |   |   |   |  |   |   |   |   |   |   |   |   |  |   |   |   |   |   |   |   |   |  |   |   |   |   |   |   |   |   |  |   |   |   |   |   |   |   |   |  |   |   |   |   |   |   |   |   |  |   |   |   |   |   |   |   |   |  |   |   |   |   |   |   |   |   |  |   |   |   |   |   |   |   |   |   |       |   |   |   |   |   |   |   |  |     |   |   |   |   |   |   |   |  |    |   |   |   |   |   |   |   |  |    |   |   |   |   |   |   |   |  |    |   |   |   |   |   |   |   |  |    |   |   |   |   |   |   |   |  |    |   |   |   |   |   |   |   |  |   |   |   |   |   |   |   |   |  |   |   |   |   |   |   |   |   |  |   |   |   |   |   |   |   |   |  |   |   |   |   |   |   |   |   |  |   |   |   |   |   |   |   |   |  |   |   |   |   |   |   |   |   |  |   |   |   |   |   |   |   |   |  |   |   |   |   |   |   |   |   |  |   |   |   |   |   |   |   |   |  |   |   |   |   |   |   |   |   |  |   |   |   |   |   |   |   |   |  |   |   |   |   |   |   |   |   |   |     |   |   |   |   |   |   |   |  |   |   |   |   |   |   |   |   |                                                                                                                                                                                                                                                                                                                                                                                                                                                                                                                                                                                                                                                                                                                                                                                                                                                                                                                                                                                                                                                                                                                                                                                                                                                                                                                                                                                                                                                                                                                                                                                                                                                                                                                                                                                                                                                                                                                                                                                                                                                                                                                                                                                                                                                                                                                                                                                                                                                                                                                                                                                                                                                                                                                                                                                                                                                                                                                                                                                                                                                                                                                                                                                                                                                                                                                                                                                                                                                                                                                                                                                                                                                                                                                                                                  |         |  |  |  |  |  |  |  |      |  |   |     |     |     |     |     |     |       |       |   |   |   |   |   |   |   |  |     |   |   |   |   |   |   |   |  |     |   |   |   |   |   |   |   |  |     |   |   |   |   |   |   |   |  |    |   |   |   |   |   |   |   |  |    |   |   |   |   |   |   |   |  |    |   |   |   |   |   |   |   |  |    |   |   |   |   |   |   |   |  |    |   |   |   |   |   |   |   |  |    |   |   |   |   |   |   |   |  |   |   |   |   |   |   |   |   |  |   |   |   |   |   |   |   |   |  |   |   |   |   |   |   |   |   |  |   |   |   |   |   |   |   |   |  |   |   |   |   |   |   |   |   |  |   |   |   |   |   |   |   |   |  |   |   |   |   |   |   |   |   |  |   |   |   |   |   |   |   |   |  |   |   |   |   |   |   |   |   |  |   |   |   |   |   |   |   |   |  |   |   |   |   |   |   |   |   |  |   |   |   |   |   |   |   |   |  |   |   |   |   |   |   |   |   |  |   |   |   |   |   |   |   |   |  |   |   |   |   |   |   |   |   |  |   |   |   |   |   |   |   |   |  |   |   |   |   |   |   |   |   |  |   |   |   |   |   |   |   |   |  |   |   |   |   |   |   |   |   |  |   |   |   |   |   |   |   |   |  |   |   |   |   |   |   |   |   |  |   |   |   |   |   |   |   |   |  |   |   |   |   |   |   |   |   |  |   |   |   |   |   |   |   |   |  |   |   |   |   |   |   |   |   |
| 96      | I                                                                                                                                                                                                                                                                                                                                                                                                                                                                                                                                                                                                                                                                                                                                                                                                                                                                                                                                                                                                                                                                                                                                                                                                                                                                                                                                                                                                                                                                                                        | F            | E   | L   |     |     |     |     |    |      |     |     |     |     |     |     |     |     |   |       |   |   |   |   |   |   |   |   |     |   |   |                                                                                                                                                                                                                                                                                                                                                                                                                                                                                                                                                                                                                                                                                |         |   |   |   |  |   |    |     |     |     |     |   |   |   |   |    |   |   |   |   |    |   |   |   |   |    |   |   |   |   |   |   |   |   |   |   |   |   |   |   |   |   |   |   |   |   |   |   |   |   |   |   |   |   |   |   |   |   |  |   |   |   |   |   |   |   |   |   |   |   |   |   |   |   |   |   |  |   |   |   |   |   |   |   |   |  |   |   |   |   |   |   |   |   |  |   |   |   |   |   |   |   |   |                                                                                                                                                                                                                                                                                                                                                                                                                                                                                                                                                                                                                                                                                                                                                                                                                                                                                                                                                                                                                                                                                                                                                                                                                                                                                                                                                                                                                                                                                                                                                                                                                                                                                                                                                                                                                                                                                                                                                                                                                                                                                                                                                                                                                                                                                                                                                                                                                                                                                                                                                                                                                                                                                                                                                                                                                                                                                                                                                                                                                                                                                                                                                                                                                                                                                                                                                                                                                                                                                                                                                                                                                                                                |         |  |  |  |  |  |  |  |      |  |   |     |     |     |     |     |     |   |       |   |   |   |   |   |   |   |  |    |   |   |   |   |   |   |   |  |   |   |   |   |   |   |   |   |  |   |   |   |   |   |   |   |   |  |   |   |   |   |   |   |   |   |  |   |   |   |   |   |   |   |   |  |   |   |   |   |   |   |   |   |  |   |   |   |   |   |   |   |   |  |   |   |   |   |   |   |   |   |  |   |   |   |   |   |   |   |   |  |   |   |   |   |   |   |   |   |  |   |   |   |   |   |   |   |   |  |   |   |   |   |   |   |   |   |   |       |   |   |   |   |   |   |   |  |     |   |   |   |   |   |   |   |  |    |   |   |   |   |   |   |   |  |    |   |   |   |   |   |   |   |  |    |   |   |   |   |   |   |   |  |    |   |   |   |   |   |   |   |  |    |   |   |   |   |   |   |   |  |   |   |   |   |   |   |   |   |  |   |   |   |   |   |   |   |   |  |   |   |   |   |   |   |   |   |  |   |   |   |   |   |   |   |   |  |   |   |   |   |   |   |   |   |  |   |   |   |   |   |   |   |   |  |   |   |   |   |   |   |   |   |  |   |   |   |   |   |   |   |   |  |   |   |   |   |   |   |   |   |  |   |   |   |   |   |   |   |   |  |   |   |   |   |   |   |   |   |  |   |   |   |   |   |   |   |   |   |     |   |   |   |   |   |   |   |  |   |   |   |   |   |   |   |   |                                                                                                                                                                                                                                                                                                                                                                                                                                                                                                                                                                                                                                                                                                                                                                                                                                                                                                                                                                                                                                                                                                                                                                                                                                                                                                                                                                                                                                                                                                                                                                                                                                                                                                                                                                                                                                                                                                                                                                                                                                                                                                                                                                                                                                                                                                                                                                                                                                                                                                                                                                                                                                                                                                                                                                                                                                                                                                                                                                                                                                                                                                                                                                                                                                                                                                                                                                                                                                                                                                                                                                                                                                                                                                                                                                  |         |  |  |  |  |  |  |  |      |  |   |     |     |     |     |     |     |       |       |   |   |   |   |   |   |   |  |     |   |   |   |   |   |   |   |  |     |   |   |   |   |   |   |   |  |     |   |   |   |   |   |   |   |  |    |   |   |   |   |   |   |   |  |    |   |   |   |   |   |   |   |  |    |   |   |   |   |   |   |   |  |    |   |   |   |   |   |   |   |  |    |   |   |   |   |   |   |   |  |    |   |   |   |   |   |   |   |  |   |   |   |   |   |   |   |   |  |   |   |   |   |   |   |   |   |  |   |   |   |   |   |   |   |   |  |   |   |   |   |   |   |   |   |  |   |   |   |   |   |   |   |   |  |   |   |   |   |   |   |   |   |  |   |   |   |   |   |   |   |   |  |   |   |   |   |   |   |   |   |  |   |   |   |   |   |   |   |   |  |   |   |   |   |   |   |   |   |  |   |   |   |   |   |   |   |   |  |   |   |   |   |   |   |   |   |  |   |   |   |   |   |   |   |   |  |   |   |   |   |   |   |   |   |  |   |   |   |   |   |   |   |   |  |   |   |   |   |   |   |   |   |  |   |   |   |   |   |   |   |   |  |   |   |   |   |   |   |   |   |  |   |   |   |   |   |   |   |   |  |   |   |   |   |   |   |   |   |  |   |   |   |   |   |   |   |   |  |   |   |   |   |   |   |   |   |  |   |   |   |   |   |   |   |   |  |   |   |   |   |   |   |   |   |  |   |   |   |   |   |   |   |   |
| 35      | I                                                                                                                                                                                                                                                                                                                                                                                                                                                                                                                                                                                                                                                                                                                                                                                                                                                                                                                                                                                                                                                                                                                                                                                                                                                                                                                                                                                                                                                                                                        | Y            | Q   | L   |     |     |     |     |    |      |     |     |     |     |     |     |     |     |   |       |   |   |   |   |   |   |   |   |     |   |   |                                                                                                                                                                                                                                                                                                                                                                                                                                                                                                                                                                                                                                                                                |         |   |   |   |  |   |    |     |     |     |     |   |   |   |   |    |   |   |   |   |    |   |   |   |   |    |   |   |   |   |   |   |   |   |   |   |   |   |   |   |   |   |   |   |   |   |   |   |   |   |   |   |   |   |   |   |   |   |  |   |   |   |   |   |   |   |   |   |   |   |   |   |   |   |   |   |  |   |   |   |   |   |   |   |   |  |   |   |   |   |   |   |   |   |  |   |   |   |   |   |   |   |   |                                                                                                                                                                                                                                                                                                                                                                                                                                                                                                                                                                                                                                                                                                                                                                                                                                                                                                                                                                                                                                                                                                                                                                                                                                                                                                                                                                                                                                                                                                                                                                                                                                                                                                                                                                                                                                                                                                                                                                                                                                                                                                                                                                                                                                                                                                                                                                                                                                                                                                                                                                                                                                                                                                                                                                                                                                                                                                                                                                                                                                                                                                                                                                                                                                                                                                                                                                                                                                                                                                                                                                                                                                                                |         |  |  |  |  |  |  |  |      |  |   |     |     |     |     |     |     |   |       |   |   |   |   |   |   |   |  |    |   |   |   |   |   |   |   |  |   |   |   |   |   |   |   |   |  |   |   |   |   |   |   |   |   |  |   |   |   |   |   |   |   |   |  |   |   |   |   |   |   |   |   |  |   |   |   |   |   |   |   |   |  |   |   |   |   |   |   |   |   |  |   |   |   |   |   |   |   |   |  |   |   |   |   |   |   |   |   |  |   |   |   |   |   |   |   |   |  |   |   |   |   |   |   |   |   |  |   |   |   |   |   |   |   |   |   |       |   |   |   |   |   |   |   |  |     |   |   |   |   |   |   |   |  |    |   |   |   |   |   |   |   |  |    |   |   |   |   |   |   |   |  |    |   |   |   |   |   |   |   |  |    |   |   |   |   |   |   |   |  |    |   |   |   |   |   |   |   |  |   |   |   |   |   |   |   |   |  |   |   |   |   |   |   |   |   |  |   |   |   |   |   |   |   |   |  |   |   |   |   |   |   |   |   |  |   |   |   |   |   |   |   |   |  |   |   |   |   |   |   |   |   |  |   |   |   |   |   |   |   |   |  |   |   |   |   |   |   |   |   |  |   |   |   |   |   |   |   |   |  |   |   |   |   |   |   |   |   |  |   |   |   |   |   |   |   |   |  |   |   |   |   |   |   |   |   |   |     |   |   |   |   |   |   |   |  |   |   |   |   |   |   |   |   |                                                                                                                                                                                                                                                                                                                                                                                                                                                                                                                                                                                                                                                                                                                                                                                                                                                                                                                                                                                                                                                                                                                                                                                                                                                                                                                                                                                                                                                                                                                                                                                                                                                                                                                                                                                                                                                                                                                                                                                                                                                                                                                                                                                                                                                                                                                                                                                                                                                                                                                                                                                                                                                                                                                                                                                                                                                                                                                                                                                                                                                                                                                                                                                                                                                                                                                                                                                                                                                                                                                                                                                                                                                                                                                                                                  |         |  |  |  |  |  |  |  |      |  |   |     |     |     |     |     |     |       |       |   |   |   |   |   |   |   |  |     |   |   |   |   |   |   |   |  |     |   |   |   |   |   |   |   |  |     |   |   |   |   |   |   |   |  |    |   |   |   |   |   |   |   |  |    |   |   |   |   |   |   |   |  |    |   |   |   |   |   |   |   |  |    |   |   |   |   |   |   |   |  |    |   |   |   |   |   |   |   |  |    |   |   |   |   |   |   |   |  |   |   |   |   |   |   |   |   |  |   |   |   |   |   |   |   |   |  |   |   |   |   |   |   |   |   |  |   |   |   |   |   |   |   |   |  |   |   |   |   |   |   |   |   |  |   |   |   |   |   |   |   |   |  |   |   |   |   |   |   |   |   |  |   |   |   |   |   |   |   |   |  |   |   |   |   |   |   |   |   |  |   |   |   |   |   |   |   |   |  |   |   |   |   |   |   |   |   |  |   |   |   |   |   |   |   |   |  |   |   |   |   |   |   |   |   |  |   |   |   |   |   |   |   |   |  |   |   |   |   |   |   |   |   |  |   |   |   |   |   |   |   |   |  |   |   |   |   |   |   |   |   |  |   |   |   |   |   |   |   |   |  |   |   |   |   |   |   |   |   |  |   |   |   |   |   |   |   |   |  |   |   |   |   |   |   |   |   |  |   |   |   |   |   |   |   |   |  |   |   |   |   |   |   |   |   |  |   |   |   |   |   |   |   |   |  |   |   |   |   |   |   |   |   |
| 34      | I                                                                                                                                                                                                                                                                                                                                                                                                                                                                                                                                                                                                                                                                                                                                                                                                                                                                                                                                                                                                                                                                                                                                                                                                                                                                                                                                                                                                                                                                                                        | F            | V   | L   |     |     |     |     |    |      |     |     |     |     |     |     |     |     |   |       |   |   |   |   |   |   |   |   |     |   |   |                                                                                                                                                                                                                                                                                                                                                                                                                                                                                                                                                                                                                                                                                |         |   |   |   |  |   |    |     |     |     |     |   |   |   |   |    |   |   |   |   |    |   |   |   |   |    |   |   |   |   |   |   |   |   |   |   |   |   |   |   |   |   |   |   |   |   |   |   |   |   |   |   |   |   |   |   |   |   |  |   |   |   |   |   |   |   |   |   |   |   |   |   |   |   |   |   |  |   |   |   |   |   |   |   |   |  |   |   |   |   |   |   |   |   |  |   |   |   |   |   |   |   |   |                                                                                                                                                                                                                                                                                                                                                                                                                                                                                                                                                                                                                                                                                                                                                                                                                                                                                                                                                                                                                                                                                                                                                                                                                                                                                                                                                                                                                                                                                                                                                                                                                                                                                                                                                                                                                                                                                                                                                                                                                                                                                                                                                                                                                                                                                                                                                                                                                                                                                                                                                                                                                                                                                                                                                                                                                                                                                                                                                                                                                                                                                                                                                                                                                                                                                                                                                                                                                                                                                                                                                                                                                                                                |         |  |  |  |  |  |  |  |      |  |   |     |     |     |     |     |     |   |       |   |   |   |   |   |   |   |  |    |   |   |   |   |   |   |   |  |   |   |   |   |   |   |   |   |  |   |   |   |   |   |   |   |   |  |   |   |   |   |   |   |   |   |  |   |   |   |   |   |   |   |   |  |   |   |   |   |   |   |   |   |  |   |   |   |   |   |   |   |   |  |   |   |   |   |   |   |   |   |  |   |   |   |   |   |   |   |   |  |   |   |   |   |   |   |   |   |  |   |   |   |   |   |   |   |   |  |   |   |   |   |   |   |   |   |   |       |   |   |   |   |   |   |   |  |     |   |   |   |   |   |   |   |  |    |   |   |   |   |   |   |   |  |    |   |   |   |   |   |   |   |  |    |   |   |   |   |   |   |   |  |    |   |   |   |   |   |   |   |  |    |   |   |   |   |   |   |   |  |   |   |   |   |   |   |   |   |  |   |   |   |   |   |   |   |   |  |   |   |   |   |   |   |   |   |  |   |   |   |   |   |   |   |   |  |   |   |   |   |   |   |   |   |  |   |   |   |   |   |   |   |   |  |   |   |   |   |   |   |   |   |  |   |   |   |   |   |   |   |   |  |   |   |   |   |   |   |   |   |  |   |   |   |   |   |   |   |   |  |   |   |   |   |   |   |   |   |  |   |   |   |   |   |   |   |   |   |     |   |   |   |   |   |   |   |  |   |   |   |   |   |   |   |   |                                                                                                                                                                                                                                                                                                                                                                                                                                                                                                                                                                                                                                                                                                                                                                                                                                                                                                                                                                                                                                                                                                                                                                                                                                                                                                                                                                                                                                                                                                                                                                                                                                                                                                                                                                                                                                                                                                                                                                                                                                                                                                                                                                                                                                                                                                                                                                                                                                                                                                                                                                                                                                                                                                                                                                                                                                                                                                                                                                                                                                                                                                                                                                                                                                                                                                                                                                                                                                                                                                                                                                                                                                                                                                                                                                  |         |  |  |  |  |  |  |  |      |  |   |     |     |     |     |     |     |       |       |   |   |   |   |   |   |   |  |     |   |   |   |   |   |   |   |  |     |   |   |   |   |   |   |   |  |     |   |   |   |   |   |   |   |  |    |   |   |   |   |   |   |   |  |    |   |   |   |   |   |   |   |  |    |   |   |   |   |   |   |   |  |    |   |   |   |   |   |   |   |  |    |   |   |   |   |   |   |   |  |    |   |   |   |   |   |   |   |  |   |   |   |   |   |   |   |   |  |   |   |   |   |   |   |   |   |  |   |   |   |   |   |   |   |   |  |   |   |   |   |   |   |   |   |  |   |   |   |   |   |   |   |   |  |   |   |   |   |   |   |   |   |  |   |   |   |   |   |   |   |   |  |   |   |   |   |   |   |   |   |  |   |   |   |   |   |   |   |   |  |   |   |   |   |   |   |   |   |  |   |   |   |   |   |   |   |   |  |   |   |   |   |   |   |   |   |  |   |   |   |   |   |   |   |   |  |   |   |   |   |   |   |   |   |  |   |   |   |   |   |   |   |   |  |   |   |   |   |   |   |   |   |  |   |   |   |   |   |   |   |   |  |   |   |   |   |   |   |   |   |  |   |   |   |   |   |   |   |   |  |   |   |   |   |   |   |   |   |  |   |   |   |   |   |   |   |   |  |   |   |   |   |   |   |   |   |  |   |   |   |   |   |   |   |   |  |   |   |   |   |   |   |   |   |  |   |   |   |   |   |   |   |   |
| 7       | V                                                                                                                                                                                                                                                                                                                                                                                                                                                                                                                                                                                                                                                                                                                                                                                                                                                                                                                                                                                                                                                                                                                                                                                                                                                                                                                                                                                                                                                                                                        | Y            | E   | L   |     |     |     |     |    |      |     |     |     |     |     |     |     |     |   |       |   |   |   |   |   |   |   |   |     |   |   |                                                                                                                                                                                                                                                                                                                                                                                                                                                                                                                                                                                                                                                                                |         |   |   |   |  |   |    |     |     |     |     |   |   |   |   |    |   |   |   |   |    |   |   |   |   |    |   |   |   |   |   |   |   |   |   |   |   |   |   |   |   |   |   |   |   |   |   |   |   |   |   |   |   |   |   |   |   |   |  |   |   |   |   |   |   |   |   |   |   |   |   |   |   |   |   |   |  |   |   |   |   |   |   |   |   |  |   |   |   |   |   |   |   |   |  |   |   |   |   |   |   |   |   |                                                                                                                                                                                                                                                                                                                                                                                                                                                                                                                                                                                                                                                                                                                                                                                                                                                                                                                                                                                                                                                                                                                                                                                                                                                                                                                                                                                                                                                                                                                                                                                                                                                                                                                                                                                                                                                                                                                                                                                                                                                                                                                                                                                                                                                                                                                                                                                                                                                                                                                                                                                                                                                                                                                                                                                                                                                                                                                                                                                                                                                                                                                                                                                                                                                                                                                                                                                                                                                                                                                                                                                                                                                                |         |  |  |  |  |  |  |  |      |  |   |     |     |     |     |     |     |   |       |   |   |   |   |   |   |   |  |    |   |   |   |   |   |   |   |  |   |   |   |   |   |   |   |   |  |   |   |   |   |   |   |   |   |  |   |   |   |   |   |   |   |   |  |   |   |   |   |   |   |   |   |  |   |   |   |   |   |   |   |   |  |   |   |   |   |   |   |   |   |  |   |   |   |   |   |   |   |   |  |   |   |   |   |   |   |   |   |  |   |   |   |   |   |   |   |   |  |   |   |   |   |   |   |   |   |  |   |   |   |   |   |   |   |   |   |       |   |   |   |   |   |   |   |  |     |   |   |   |   |   |   |   |  |    |   |   |   |   |   |   |   |  |    |   |   |   |   |   |   |   |  |    |   |   |   |   |   |   |   |  |    |   |   |   |   |   |   |   |  |    |   |   |   |   |   |   |   |  |   |   |   |   |   |   |   |   |  |   |   |   |   |   |   |   |   |  |   |   |   |   |   |   |   |   |  |   |   |   |   |   |   |   |   |  |   |   |   |   |   |   |   |   |  |   |   |   |   |   |   |   |   |  |   |   |   |   |   |   |   |   |  |   |   |   |   |   |   |   |   |  |   |   |   |   |   |   |   |   |  |   |   |   |   |   |   |   |   |  |   |   |   |   |   |   |   |   |  |   |   |   |   |   |   |   |   |   |     |   |   |   |   |   |   |   |  |   |   |   |   |   |   |   |   |                                                                                                                                                                                                                                                                                                                                                                                                                                                                                                                                                                                                                                                                                                                                                                                                                                                                                                                                                                                                                                                                                                                                                                                                                                                                                                                                                                                                                                                                                                                                                                                                                                                                                                                                                                                                                                                                                                                                                                                                                                                                                                                                                                                                                                                                                                                                                                                                                                                                                                                                                                                                                                                                                                                                                                                                                                                                                                                                                                                                                                                                                                                                                                                                                                                                                                                                                                                                                                                                                                                                                                                                                                                                                                                                                                  |         |  |  |  |  |  |  |  |      |  |   |     |     |     |     |     |     |       |       |   |   |   |   |   |   |   |  |     |   |   |   |   |   |   |   |  |     |   |   |   |   |   |   |   |  |     |   |   |   |   |   |   |   |  |    |   |   |   |   |   |   |   |  |    |   |   |   |   |   |   |   |  |    |   |   |   |   |   |   |   |  |    |   |   |   |   |   |   |   |  |    |   |   |   |   |   |   |   |  |    |   |   |   |   |   |   |   |  |   |   |   |   |   |   |   |   |  |   |   |   |   |   |   |   |   |  |   |   |   |   |   |   |   |   |  |   |   |   |   |   |   |   |   |  |   |   |   |   |   |   |   |   |  |   |   |   |   |   |   |   |   |  |   |   |   |   |   |   |   |   |  |   |   |   |   |   |   |   |   |  |   |   |   |   |   |   |   |   |  |   |   |   |   |   |   |   |   |  |   |   |   |   |   |   |   |   |  |   |   |   |   |   |   |   |   |  |   |   |   |   |   |   |   |   |  |   |   |   |   |   |   |   |   |  |   |   |   |   |   |   |   |   |  |   |   |   |   |   |   |   |   |  |   |   |   |   |   |   |   |   |  |   |   |   |   |   |   |   |   |  |   |   |   |   |   |   |   |   |  |   |   |   |   |   |   |   |   |  |   |   |   |   |   |   |   |   |  |   |   |   |   |   |   |   |   |  |   |   |   |   |   |   |   |   |  |   |   |   |   |   |   |   |   |  |   |   |   |   |   |   |   |   |
| 2       | I                                                                                                                                                                                                                                                                                                                                                                                                                                                                                                                                                                                                                                                                                                                                                                                                                                                                                                                                                                                                                                                                                                                                                                                                                                                                                                                                                                                                                                                                                                        | Y            | K   | L   |     |     |     |     |    |      |     |     |     |     |     |     |     |     |   |       |   |   |   |   |   |   |   |   |     |   |   |                                                                                                                                                                                                                                                                                                                                                                                                                                                                                                                                                                                                                                                                                |         |   |   |   |  |   |    |     |     |     |     |   |   |   |   |    |   |   |   |   |    |   |   |   |   |    |   |   |   |   |   |   |   |   |   |   |   |   |   |   |   |   |   |   |   |   |   |   |   |   |   |   |   |   |   |   |   |   |  |   |   |   |   |   |   |   |   |   |   |   |   |   |   |   |   |   |  |   |   |   |   |   |   |   |   |  |   |   |   |   |   |   |   |   |  |   |   |   |   |   |   |   |   |                                                                                                                                                                                                                                                                                                                                                                                                                                                                                                                                                                                                                                                                                                                                                                                                                                                                                                                                                                                                                                                                                                                                                                                                                                                                                                                                                                                                                                                                                                                                                                                                                                                                                                                                                                                                                                                                                                                                                                                                                                                                                                                                                                                                                                                                                                                                                                                                                                                                                                                                                                                                                                                                                                                                                                                                                                                                                                                                                                                                                                                                                                                                                                                                                                                                                                                                                                                                                                                                                                                                                                                                                                                                |         |  |  |  |  |  |  |  |      |  |   |     |     |     |     |     |     |   |       |   |   |   |   |   |   |   |  |    |   |   |   |   |   |   |   |  |   |   |   |   |   |   |   |   |  |   |   |   |   |   |   |   |   |  |   |   |   |   |   |   |   |   |  |   |   |   |   |   |   |   |   |  |   |   |   |   |   |   |   |   |  |   |   |   |   |   |   |   |   |  |   |   |   |   |   |   |   |   |  |   |   |   |   |   |   |   |   |  |   |   |   |   |   |   |   |   |  |   |   |   |   |   |   |   |   |  |   |   |   |   |   |   |   |   |   |       |   |   |   |   |   |   |   |  |     |   |   |   |   |   |   |   |  |    |   |   |   |   |   |   |   |  |    |   |   |   |   |   |   |   |  |    |   |   |   |   |   |   |   |  |    |   |   |   |   |   |   |   |  |    |   |   |   |   |   |   |   |  |   |   |   |   |   |   |   |   |  |   |   |   |   |   |   |   |   |  |   |   |   |   |   |   |   |   |  |   |   |   |   |   |   |   |   |  |   |   |   |   |   |   |   |   |  |   |   |   |   |   |   |   |   |  |   |   |   |   |   |   |   |   |  |   |   |   |   |   |   |   |   |  |   |   |   |   |   |   |   |   |  |   |   |   |   |   |   |   |   |  |   |   |   |   |   |   |   |   |  |   |   |   |   |   |   |   |   |   |     |   |   |   |   |   |   |   |  |   |   |   |   |   |   |   |   |                                                                                                                                                                                                                                                                                                                                                                                                                                                                                                                                                                                                                                                                                                                                                                                                                                                                                                                                                                                                                                                                                                                                                                                                                                                                                                                                                                                                                                                                                                                                                                                                                                                                                                                                                                                                                                                                                                                                                                                                                                                                                                                                                                                                                                                                                                                                                                                                                                                                                                                                                                                                                                                                                                                                                                                                                                                                                                                                                                                                                                                                                                                                                                                                                                                                                                                                                                                                                                                                                                                                                                                                                                                                                                                                                                  |         |  |  |  |  |  |  |  |      |  |   |     |     |     |     |     |     |       |       |   |   |   |   |   |   |   |  |     |   |   |   |   |   |   |   |  |     |   |   |   |   |   |   |   |  |     |   |   |   |   |   |   |   |  |    |   |   |   |   |   |   |   |  |    |   |   |   |   |   |   |   |  |    |   |   |   |   |   |   |   |  |    |   |   |   |   |   |   |   |  |    |   |   |   |   |   |   |   |  |    |   |   |   |   |   |   |   |  |   |   |   |   |   |   |   |   |  |   |   |   |   |   |   |   |   |  |   |   |   |   |   |   |   |   |  |   |   |   |   |   |   |   |   |  |   |   |   |   |   |   |   |   |  |   |   |   |   |   |   |   |   |  |   |   |   |   |   |   |   |   |  |   |   |   |   |   |   |   |   |  |   |   |   |   |   |   |   |   |  |   |   |   |   |   |   |   |   |  |   |   |   |   |   |   |   |   |  |   |   |   |   |   |   |   |   |  |   |   |   |   |   |   |   |   |  |   |   |   |   |   |   |   |   |  |   |   |   |   |   |   |   |   |  |   |   |   |   |   |   |   |   |  |   |   |   |   |   |   |   |   |  |   |   |   |   |   |   |   |   |  |   |   |   |   |   |   |   |   |  |   |   |   |   |   |   |   |   |  |   |   |   |   |   |   |   |   |  |   |   |   |   |   |   |   |   |  |   |   |   |   |   |   |   |   |  |   |   |   |   |   |   |   |   |  |   |   |   |   |   |   |   |   |
| 1       | V                                                                                                                                                                                                                                                                                                                                                                                                                                                                                                                                                                                                                                                                                                                                                                                                                                                                                                                                                                                                                                                                                                                                                                                                                                                                                                                                                                                                                                                                                                        | F            | E   | L   |     |     |     |     |    |      |     |     |     |     |     |     |     |     |   |       |   |   |   |   |   |   |   |   |     |   |   |                                                                                                                                                                                                                                                                                                                                                                                                                                                                                                                                                                                                                                                                                |         |   |   |   |  |   |    |     |     |     |     |   |   |   |   |    |   |   |   |   |    |   |   |   |   |    |   |   |   |   |   |   |   |   |   |   |   |   |   |   |   |   |   |   |   |   |   |   |   |   |   |   |   |   |   |   |   |   |  |   |   |   |   |   |   |   |   |   |   |   |   |   |   |   |   |   |  |   |   |   |   |   |   |   |   |  |   |   |   |   |   |   |   |   |  |   |   |   |   |   |   |   |   |                                                                                                                                                                                                                                                                                                                                                                                                                                                                                                                                                                                                                                                                                                                                                                                                                                                                                                                                                                                                                                                                                                                                                                                                                                                                                                                                                                                                                                                                                                                                                                                                                                                                                                                                                                                                                                                                                                                                                                                                                                                                                                                                                                                                                                                                                                                                                                                                                                                                                                                                                                                                                                                                                                                                                                                                                                                                                                                                                                                                                                                                                                                                                                                                                                                                                                                                                                                                                                                                                                                                                                                                                                                                |         |  |  |  |  |  |  |  |      |  |   |     |     |     |     |     |     |   |       |   |   |   |   |   |   |   |  |    |   |   |   |   |   |   |   |  |   |   |   |   |   |   |   |   |  |   |   |   |   |   |   |   |   |  |   |   |   |   |   |   |   |   |  |   |   |   |   |   |   |   |   |  |   |   |   |   |   |   |   |   |  |   |   |   |   |   |   |   |   |  |   |   |   |   |   |   |   |   |  |   |   |   |   |   |   |   |   |  |   |   |   |   |   |   |   |   |  |   |   |   |   |   |   |   |   |  |   |   |   |   |   |   |   |   |   |       |   |   |   |   |   |   |   |  |     |   |   |   |   |   |   |   |  |    |   |   |   |   |   |   |   |  |    |   |   |   |   |   |   |   |  |    |   |   |   |   |   |   |   |  |    |   |   |   |   |   |   |   |  |    |   |   |   |   |   |   |   |  |   |   |   |   |   |   |   |   |  |   |   |   |   |   |   |   |   |  |   |   |   |   |   |   |   |   |  |   |   |   |   |   |   |   |   |  |   |   |   |   |   |   |   |   |  |   |   |   |   |   |   |   |   |  |   |   |   |   |   |   |   |   |  |   |   |   |   |   |   |   |   |  |   |   |   |   |   |   |   |   |  |   |   |   |   |   |   |   |   |  |   |   |   |   |   |   |   |   |  |   |   |   |   |   |   |   |   |   |     |   |   |   |   |   |   |   |  |   |   |   |   |   |   |   |   |                                                                                                                                                                                                                                                                                                                                                                                                                                                                                                                                                                                                                                                                                                                                                                                                                                                                                                                                                                                                                                                                                                                                                                                                                                                                                                                                                                                                                                                                                                                                                                                                                                                                                                                                                                                                                                                                                                                                                                                                                                                                                                                                                                                                                                                                                                                                                                                                                                                                                                                                                                                                                                                                                                                                                                                                                                                                                                                                                                                                                                                                                                                                                                                                                                                                                                                                                                                                                                                                                                                                                                                                                                                                                                                                                                  |         |  |  |  |  |  |  |  |      |  |   |     |     |     |     |     |     |       |       |   |   |   |   |   |   |   |  |     |   |   |   |   |   |   |   |  |     |   |   |   |   |   |   |   |  |     |   |   |   |   |   |   |   |  |    |   |   |   |   |   |   |   |  |    |   |   |   |   |   |   |   |  |    |   |   |   |   |   |   |   |  |    |   |   |   |   |   |   |   |  |    |   |   |   |   |   |   |   |  |    |   |   |   |   |   |   |   |  |   |   |   |   |   |   |   |   |  |   |   |   |   |   |   |   |   |  |   |   |   |   |   |   |   |   |  |   |   |   |   |   |   |   |   |  |   |   |   |   |   |   |   |   |  |   |   |   |   |   |   |   |   |  |   |   |   |   |   |   |   |   |  |   |   |   |   |   |   |   |   |  |   |   |   |   |   |   |   |   |  |   |   |   |   |   |   |   |   |  |   |   |   |   |   |   |   |   |  |   |   |   |   |   |   |   |   |  |   |   |   |   |   |   |   |   |  |   |   |   |   |   |   |   |   |  |   |   |   |   |   |   |   |   |  |   |   |   |   |   |   |   |   |  |   |   |   |   |   |   |   |   |  |   |   |   |   |   |   |   |   |  |   |   |   |   |   |   |   |   |  |   |   |   |   |   |   |   |   |  |   |   |   |   |   |   |   |   |  |   |   |   |   |   |   |   |   |  |   |   |   |   |   |   |   |   |  |   |   |   |   |   |   |   |   |  |   |   |   |   |   |   |   |   |
| 1       | I                                                                                                                                                                                                                                                                                                                                                                                                                                                                                                                                                                                                                                                                                                                                                                                                                                                                                                                                                                                                                                                                                                                                                                                                                                                                                                                                                                                                                                                                                                        | F            | Q   | L   |     |     |     |     |    |      |     |     |     |     |     |     |     |     |   |       |   |   |   |   |   |   |   |   |     |   |   |                                                                                                                                                                                                                                                                                                                                                                                                                                                                                                                                                                                                                                                                                |         |   |   |   |  |   |    |     |     |     |     |   |   |   |   |    |   |   |   |   |    |   |   |   |   |    |   |   |   |   |   |   |   |   |   |   |   |   |   |   |   |   |   |   |   |   |   |   |   |   |   |   |   |   |   |   |   |   |  |   |   |   |   |   |   |   |   |   |   |   |   |   |   |   |   |   |  |   |   |   |   |   |   |   |   |  |   |   |   |   |   |   |   |   |  |   |   |   |   |   |   |   |   |                                                                                                                                                                                                                                                                                                                                                                                                                                                                                                                                                                                                                                                                                                                                                                                                                                                                                                                                                                                                                                                                                                                                                                                                                                                                                                                                                                                                                                                                                                                                                                                                                                                                                                                                                                                                                                                                                                                                                                                                                                                                                                                                                                                                                                                                                                                                                                                                                                                                                                                                                                                                                                                                                                                                                                                                                                                                                                                                                                                                                                                                                                                                                                                                                                                                                                                                                                                                                                                                                                                                                                                                                                                                |         |  |  |  |  |  |  |  |      |  |   |     |     |     |     |     |     |   |       |   |   |   |   |   |   |   |  |    |   |   |   |   |   |   |   |  |   |   |   |   |   |   |   |   |  |   |   |   |   |   |   |   |   |  |   |   |   |   |   |   |   |   |  |   |   |   |   |   |   |   |   |  |   |   |   |   |   |   |   |   |  |   |   |   |   |   |   |   |   |  |   |   |   |   |   |   |   |   |  |   |   |   |   |   |   |   |   |  |   |   |   |   |   |   |   |   |  |   |   |   |   |   |   |   |   |  |   |   |   |   |   |   |   |   |   |       |   |   |   |   |   |   |   |  |     |   |   |   |   |   |   |   |  |    |   |   |   |   |   |   |   |  |    |   |   |   |   |   |   |   |  |    |   |   |   |   |   |   |   |  |    |   |   |   |   |   |   |   |  |    |   |   |   |   |   |   |   |  |   |   |   |   |   |   |   |   |  |   |   |   |   |   |   |   |   |  |   |   |   |   |   |   |   |   |  |   |   |   |   |   |   |   |   |  |   |   |   |   |   |   |   |   |  |   |   |   |   |   |   |   |   |  |   |   |   |   |   |   |   |   |  |   |   |   |   |   |   |   |   |  |   |   |   |   |   |   |   |   |  |   |   |   |   |   |   |   |   |  |   |   |   |   |   |   |   |   |  |   |   |   |   |   |   |   |   |   |     |   |   |   |   |   |   |   |  |   |   |   |   |   |   |   |   |                                                                                                                                                                                                                                                                                                                                                                                                                                                                                                                                                                                                                                                                                                                                                                                                                                                                                                                                                                                                                                                                                                                                                                                                                                                                                                                                                                                                                                                                                                                                                                                                                                                                                                                                                                                                                                                                                                                                                                                                                                                                                                                                                                                                                                                                                                                                                                                                                                                                                                                                                                                                                                                                                                                                                                                                                                                                                                                                                                                                                                                                                                                                                                                                                                                                                                                                                                                                                                                                                                                                                                                                                                                                                                                                                                  |         |  |  |  |  |  |  |  |      |  |   |     |     |     |     |     |     |       |       |   |   |   |   |   |   |   |  |     |   |   |   |   |   |   |   |  |     |   |   |   |   |   |   |   |  |     |   |   |   |   |   |   |   |  |    |   |   |   |   |   |   |   |  |    |   |   |   |   |   |   |   |  |    |   |   |   |   |   |   |   |  |    |   |   |   |   |   |   |   |  |    |   |   |   |   |   |   |   |  |    |   |   |   |   |   |   |   |  |   |   |   |   |   |   |   |   |  |   |   |   |   |   |   |   |   |  |   |   |   |   |   |   |   |   |  |   |   |   |   |   |   |   |   |  |   |   |   |   |   |   |   |   |  |   |   |   |   |   |   |   |   |  |   |   |   |   |   |   |   |   |  |   |   |   |   |   |   |   |   |  |   |   |   |   |   |   |   |   |  |   |   |   |   |   |   |   |   |  |   |   |   |   |   |   |   |   |  |   |   |   |   |   |   |   |   |  |   |   |   |   |   |   |   |   |  |   |   |   |   |   |   |   |   |  |   |   |   |   |   |   |   |   |  |   |   |   |   |   |   |   |   |  |   |   |   |   |   |   |   |   |  |   |   |   |   |   |   |   |   |  |   |   |   |   |   |   |   |   |  |   |   |   |   |   |   |   |   |  |   |   |   |   |   |   |   |   |  |   |   |   |   |   |   |   |   |  |   |   |   |   |   |   |   |   |  |   |   |   |   |   |   |   |   |  |   |   |   |   |   |   |   |   |
| 1       | I                                                                                                                                                                                                                                                                                                                                                                                                                                                                                                                                                                                                                                                                                                                                                                                                                                                                                                                                                                                                                                                                                                                                                                                                                                                                                                                                                                                                                                                                                                        | Y            | V   | L   |     |     |     |     |    |      |     |     |     |     |     |     |     |     |   |       |   |   |   |   |   |   |   |   |     |   |   |                                                                                                                                                                                                                                                                                                                                                                                                                                                                                                                                                                                                                                                                                |         |   |   |   |  |   |    |     |     |     |     |   |   |   |   |    |   |   |   |   |    |   |   |   |   |    |   |   |   |   |   |   |   |   |   |   |   |   |   |   |   |   |   |   |   |   |   |   |   |   |   |   |   |   |   |   |   |   |  |   |   |   |   |   |   |   |   |   |   |   |   |   |   |   |   |   |  |   |   |   |   |   |   |   |   |  |   |   |   |   |   |   |   |   |  |   |   |   |   |   |   |   |   |                                                                                                                                                                                                                                                                                                                                                                                                                                                                                                                                                                                                                                                                                                                                                                                                                                                                                                                                                                                                                                                                                                                                                                                                                                                                                                                                                                                                                                                                                                                                                                                                                                                                                                                                                                                                                                                                                                                                                                                                                                                                                                                                                                                                                                                                                                                                                                                                                                                                                                                                                                                                                                                                                                                                                                                                                                                                                                                                                                                                                                                                                                                                                                                                                                                                                                                                                                                                                                                                                                                                                                                                                                                                |         |  |  |  |  |  |  |  |      |  |   |     |     |     |     |     |     |   |       |   |   |   |   |   |   |   |  |    |   |   |   |   |   |   |   |  |   |   |   |   |   |   |   |   |  |   |   |   |   |   |   |   |   |  |   |   |   |   |   |   |   |   |  |   |   |   |   |   |   |   |   |  |   |   |   |   |   |   |   |   |  |   |   |   |   |   |   |   |   |  |   |   |   |   |   |   |   |   |  |   |   |   |   |   |   |   |   |  |   |   |   |   |   |   |   |   |  |   |   |   |   |   |   |   |   |  |   |   |   |   |   |   |   |   |   |       |   |   |   |   |   |   |   |  |     |   |   |   |   |   |   |   |  |    |   |   |   |   |   |   |   |  |    |   |   |   |   |   |   |   |  |    |   |   |   |   |   |   |   |  |    |   |   |   |   |   |   |   |  |    |   |   |   |   |   |   |   |  |   |   |   |   |   |   |   |   |  |   |   |   |   |   |   |   |   |  |   |   |   |   |   |   |   |   |  |   |   |   |   |   |   |   |   |  |   |   |   |   |   |   |   |   |  |   |   |   |   |   |   |   |   |  |   |   |   |   |   |   |   |   |  |   |   |   |   |   |   |   |   |  |   |   |   |   |   |   |   |   |  |   |   |   |   |   |   |   |   |  |   |   |   |   |   |   |   |   |  |   |   |   |   |   |   |   |   |   |     |   |   |   |   |   |   |   |  |   |   |   |   |   |   |   |   |                                                                                                                                                                                                                                                                                                                                                                                                                                                                                                                                                                                                                                                                                                                                                                                                                                                                                                                                                                                                                                                                                                                                                                                                                                                                                                                                                                                                                                                                                                                                                                                                                                                                                                                                                                                                                                                                                                                                                                                                                                                                                                                                                                                                                                                                                                                                                                                                                                                                                                                                                                                                                                                                                                                                                                                                                                                                                                                                                                                                                                                                                                                                                                                                                                                                                                                                                                                                                                                                                                                                                                                                                                                                                                                                                                  |         |  |  |  |  |  |  |  |      |  |   |     |     |     |     |     |     |       |       |   |   |   |   |   |   |   |  |     |   |   |   |   |   |   |   |  |     |   |   |   |   |   |   |   |  |     |   |   |   |   |   |   |   |  |    |   |   |   |   |   |   |   |  |    |   |   |   |   |   |   |   |  |    |   |   |   |   |   |   |   |  |    |   |   |   |   |   |   |   |  |    |   |   |   |   |   |   |   |  |    |   |   |   |   |   |   |   |  |   |   |   |   |   |   |   |   |  |   |   |   |   |   |   |   |   |  |   |   |   |   |   |   |   |   |  |   |   |   |   |   |   |   |   |  |   |   |   |   |   |   |   |   |  |   |   |   |   |   |   |   |   |  |   |   |   |   |   |   |   |   |  |   |   |   |   |   |   |   |   |  |   |   |   |   |   |   |   |   |  |   |   |   |   |   |   |   |   |  |   |   |   |   |   |   |   |   |  |   |   |   |   |   |   |   |   |  |   |   |   |   |   |   |   |   |  |   |   |   |   |   |   |   |   |  |   |   |   |   |   |   |   |   |  |   |   |   |   |   |   |   |   |  |   |   |   |   |   |   |   |   |  |   |   |   |   |   |   |   |   |  |   |   |   |   |   |   |   |   |  |   |   |   |   |   |   |   |   |  |   |   |   |   |   |   |   |   |  |   |   |   |   |   |   |   |   |  |   |   |   |   |   |   |   |   |  |   |   |   |   |   |   |   |   |  |   |   |   |   |   |   |   |   |
| VP2     | <table><tr><th colspan="8">Residue</th></tr><tr><th>Type</th><th></th><th>5</th><th>267</th><th>297</th><th>324</th><th>370</th><th>426</th><th>440</th></tr><tr><td>c</td><td>N 368</td><td>G</td><td>Y</td><td>A</td><td>I</td><td>R</td><td>E</td><td>T</td></tr><tr><td></td><td>111</td><td>A</td><td>Y</td><td>A</td><td>I</td><td>R</td><td>E</td><td>T</td></tr><tr><td></td><td>6</td><td>G</td><td>Y</td><td>A</td><td>I</td><td>Q</td><td>E</td><td>T</td></tr><tr><td></td><td>4</td><td>A</td><td>Y</td><td>A</td><td>I</td><td>Q</td><td>E</td><td>T</td></tr><tr><td></td><td>1</td><td>G</td><td>Y</td><td>A</td><td>I</td><td>R</td><td>E</td><td>A</td></tr><tr><td></td><td>1</td><td>G</td><td>Y</td><td>A</td><td>L</td><td>R</td><td>E</td><td>T</td></tr><tr><td>b</td><td>1</td><td>G</td><td>Y</td><td>A</td><td>I</td><td>R</td><td>D</td><td>T</td></tr><tr><td></td><td>1</td><td>G</td><td>Y</td><td>A</td><td>I</td><td>Q</td><td>D</td><td>T</td></tr><tr><td></td><td>1</td><td>A</td><td>Y</td><td>A</td><td>I</td><td>R</td><td>D</td><td>T</td></tr><tr><td>a</td><td>1</td><td>G</td><td>F</td><td>A</td><td>I</td><td>Q</td><td>N</td><td>T</td></tr><tr><td></td><td>1</td><td>G</td><td>Y</td><td>A</td><td>I</td><td>R</td><td>N</td><td>A</td></tr><tr><td></td><td>1</td><td>A</td><td>Y</td><td>A</td><td>I</td><td>R</td><td>N</td><td>T</td></tr><tr><td></td><td>1</td><td>G</td><td>Y</td><td>A</td><td>I</td><td>Q</td><td>N</td><td>T</td></tr></table> | Residue      |     |     |     |     |     |     |    | Type |     | 5   | 267 | 297 | 324 | 370 | 426 | 440 | c | N 368 | G | Y | A | I | R | E | T |   | 111 | A | Y | A                                                                                                                                                                                                                                                                                                                                                                                                                                                                                                                                                                                                                                                                              | I       | R | E | T |  | 6 | G  | Y   | A   | I   | Q   | E | T |   | 4 | A  | Y | A | I | Q | E  | T |   | 1 | G | Y  | A | I | R | E | A |   | 1 | G | Y | A | L | R | E | T | b | 1 | G | Y | A | I | R | D | T |   | 1 | G | Y | A | I | Q | D | T |  | 1 | A | Y | A | I | R | D | T | a | 1 | G | F | A | I | Q | N | T |  | 1 | G | Y | A | I | R | N | A |  | 1 | A | Y | A | I | R | N | T |  | 1 | G | Y | A | I | Q | N | T | <table><tr><th colspan="8">Residue</th></tr><tr><th>Type</th><th></th><th>5</th><th>267</th><th>297</th><th>324</th><th>370</th><th>426</th><th>440</th></tr><tr><td>c</td><td>N 417</td><td>A</td><td>F</td><td>A</td><td>Y</td><td>Q</td><td>E</td><td>T</td></tr><tr><td></td><td>50</td><td>A</td><td>F</td><td>A</td><td>Y</td><td>Q</td><td>E</td><td>A</td></tr><tr><td></td><td>9</td><td>A</td><td>Y</td><td>A</td><td>I</td><td>R</td><td>E</td><td>T</td></tr><tr><td></td><td>3</td><td>A</td><td>Y</td><td>A</td><td>I</td><td>Q</td><td>E</td><td>T</td></tr><tr><td></td><td>2</td><td>A</td><td>F</td><td>N</td><td>N</td><td>Q</td><td>E</td><td>T</td></tr><tr><td></td><td>2</td><td>A</td><td>F</td><td>A</td><td>Y</td><td>Q</td><td>E</td><td>S</td></tr><tr><td></td><td>1</td><td>A</td><td>F</td><td>S</td><td>Y</td><td>Q</td><td>E</td><td>T</td></tr><tr><td></td><td>1</td><td>G</td><td>Y</td><td>A</td><td>I</td><td>Q</td><td>E</td><td>T</td></tr><tr><td></td><td>1</td><td>A</td><td>Y</td><td>A</td><td>I</td><td>Q</td><td>E</td><td>A</td></tr><tr><td></td><td>1</td><td>A</td><td>F</td><td>A</td><td>Y</td><td>R</td><td>E</td><td>T</td></tr><tr><td></td><td>1</td><td>A</td><td>Y</td><td>A</td><td>Y</td><td>Q</td><td>E</td><td>A</td></tr><tr><td></td><td>1</td><td>A</td><td>Y</td><td>A</td><td>Y</td><td>Q</td><td>E</td><td>T</td></tr><tr><td></td><td>1</td><td>F</td><td>F</td><td>A</td><td>Y</td><td>Q</td><td>E</td><td>T</td></tr><tr><td>b</td><td>N 392</td><td>A</td><td>F</td><td>A</td><td>Y</td><td>Q</td><td>D</td><td>T</td></tr><tr><td></td><td>154</td><td>A</td><td>Y</td><td>A</td><td>I</td><td>Q</td><td>D</td><td>A</td></tr><tr><td></td><td>48</td><td>A</td><td>Y</td><td>A</td><td>I</td><td>Q</td><td>D</td><td>T</td></tr><tr><td></td><td>44</td><td>G</td><td>Y</td><td>A</td><td>Y</td><td>Q</td><td>D</td><td>T</td></tr><tr><td></td><td>23</td><td>A</td><td>Y</td><td>A</td><td>Y</td><td>Q</td><td>D</td><td>T</td></tr><tr><td></td><td>21</td><td>A</td><td>F</td><td>S</td><td>Y</td><td>Q</td><td>D</td><td>T</td></tr><tr><td></td><td>12</td><td>A</td><td>F</td><td>N</td><td>Y</td><td>Q</td><td>D</td><td>T</td></tr><tr><td></td><td>6</td><td>A</td><td>F</td><td>N</td><td>I</td><td>Q</td><td>D</td><td>T</td></tr><tr><td></td><td>5</td><td>A</td><td>F</td><td>A</td><td>L</td><td>Q</td><td>D</td><td>T</td></tr><tr><td></td><td>3</td><td>A</td><td>F</td><td>A</td><td>Y</td><td>Q</td><td>D</td><td>S</td></tr><tr><td></td><td>2</td><td>A</td><td>F</td><td>A</td><td>I</td><td>Q</td><td>D</td><td>T</td></tr><tr><td></td><td>2</td><td>A</td><td>F</td><td>N</td><td>I</td><td>Q</td><td>D</td><td>T</td></tr><tr><td></td><td>2</td><td>A</td><td>F</td><td>A</td><td>Y</td><td>Q</td><td>D</td><td>A</td></tr><tr><td></td><td>1</td><td>A</td><td>L</td><td>A</td><td>Y</td><td>Q</td><td>D</td><td>T</td></tr><tr><td></td><td>1</td><td>A</td><td>F</td><td>S</td><td>Y</td><td>Q</td><td>D</td><td>A</td></tr><tr><td></td><td>1</td><td>G</td><td>Y</td><td>A</td><td>I</td><td>Q</td><td>D</td><td>A</td></tr><tr><td></td><td>1</td><td>A</td><td>Y</td><td>T</td><td>I</td><td>Q</td><td>D</td><td>T</td></tr><tr><td></td><td>1</td><td>A</td><td>Y</td><td>A</td><td>N</td><td>Q</td><td>D</td><td>T</td></tr><tr><td></td><td>1</td><td>A</td><td>Y</td><td>A</td><td>Y</td><td>Q</td><td>D</td><td>A</td></tr><tr><td>?</td><td>N 7</td><td>A</td><td>F</td><td>S</td><td>Y</td><td>Q</td><td>K</td><td>T</td></tr><tr><td></td><td>5</td><td>T</td><td>F</td><td>S</td><td>Y</td><td>Q</td><td>K</td><td>T</td></tr></table> | Residue |  |  |  |  |  |  |  | Type |  | 5 | 267 | 297 | 324 | 370 | 426 | 440 | c | N 417 | A | F | A | Y | Q | E | T |  | 50 | A | F | A | Y | Q | E | A |  | 9 | A | Y | A | I | R | E | T |  | 3 | A | Y | A | I | Q | E | T |  | 2 | A | F | N | N | Q | E | T |  | 2 | A | F | A | Y | Q | E | S |  | 1 | A | F | S | Y | Q | E | T |  | 1 | G | Y | A | I | Q | E | T |  | 1 | A | Y | A | I | Q | E | A |  | 1 | A | F | A | Y | R | E | T |  | 1 | A | Y | A | Y | Q | E | A |  | 1 | A | Y | A | Y | Q | E | T |  | 1 | F | F | A | Y | Q | E | T | b | N 392 | A | F | A | Y | Q | D | T |  | 154 | A | Y | A | I | Q | D | A |  | 48 | A | Y | A | I | Q | D | T |  | 44 | G | Y | A | Y | Q | D | T |  | 23 | A | Y | A | Y | Q | D | T |  | 21 | A | F | S | Y | Q | D | T |  | 12 | A | F | N | Y | Q | D | T |  | 6 | A | F | N | I | Q | D | T |  | 5 | A | F | A | L | Q | D | T |  | 3 | A | F | A | Y | Q | D | S |  | 2 | A | F | A | I | Q | D | T |  | 2 | A | F | N | I | Q | D | T |  | 2 | A | F | A | Y | Q | D | A |  | 1 | A | L | A | Y | Q | D | T |  | 1 | A | F | S | Y | Q | D | A |  | 1 | G | Y | A | I | Q | D | A |  | 1 | A | Y | T | I | Q | D | T |  | 1 | A | Y | A | N | Q | D | T |  | 1 | A | Y | A | Y | Q | D | A | ? | N 7 | A | F | S | Y | Q | K | T |  | 5 | T | F | S | Y | Q | K | T | <table><tr><th colspan="8">Residue</th></tr><tr><th>Type</th><th></th><th>5</th><th>267</th><th>297</th><th>324</th><th>370</th><th>426</th><th>440</th></tr><tr><td>a/FPV</td><td>N 846</td><td>A</td><td>F</td><td>S</td><td>Y</td><td>Q</td><td>N</td><td>T</td></tr><tr><td></td><td>591</td><td>A</td><td>Y</td><td>A</td><td>I</td><td>Q</td><td>N</td><td>A</td></tr><tr><td></td><td>398</td><td>A</td><td>F</td><td>A</td><td>Y</td><td>Q</td><td>N</td><td>T</td></tr><tr><td></td><td>229</td><td>A</td><td>F</td><td>A</td><td>I</td><td>Q</td><td>N</td><td>T</td></tr><tr><td></td><td>51</td><td>A</td><td>F</td><td>A</td><td>Y</td><td>Q</td><td>N</td><td>A</td></tr><tr><td></td><td>21</td><td>A</td><td>Y</td><td>A</td><td>I</td><td>Q</td><td>N</td><td>T</td></tr><tr><td></td><td>18</td><td>A</td><td>F</td><td>A</td><td>L</td><td>Q</td><td>N</td><td>T</td></tr><tr><td></td><td>18</td><td>A</td><td>F</td><td>S</td><td>Y</td><td>Q</td><td>N</td><td>T</td></tr><tr><td></td><td>17</td><td>A</td><td>F</td><td>A</td><td>Y</td><td>Q</td><td>N</td><td>S</td></tr><tr><td></td><td>11</td><td>G</td><td>Y</td><td>A</td><td>Y</td><td>Q</td><td>N</td><td>T</td></tr><tr><td></td><td>7</td><td>A</td><td>F</td><td>A</td><td>I</td><td>Q</td><td>N</td><td>A</td></tr><tr><td></td><td>6</td><td>G</td><td>Y</td><td>A</td><td>I</td><td>Q</td><td>N</td><td>A</td></tr><tr><td></td><td>6</td><td>G</td><td>F</td><td>A</td><td>I</td><td>Q</td><td>N</td><td>T</td></tr><tr><td></td><td>6</td><td>A</td><td>F</td><td>A</td><td>I</td><td>R</td><td>N</td><td>T</td></tr><tr><td></td><td>6</td><td>A</td><td>F</td><td>N</td><td>Y</td><td>Q</td><td>N</td><td>T</td></tr><tr><td></td><td>4</td><td>G</td><td>F</td><td>A</td><td>Y</td><td>Q</td><td>N</td><td>T</td></tr><tr><td></td><td>4</td><td>A</td><td>F</td><td>N</td><td>Y</td><td>Q</td><td>N</td><td>A</td></tr><tr><td></td><td>3</td><td>A</td><td>Y</td><td>A</td><td>Y</td><td>Q</td><td>N</td><td>T</td></tr><tr><td></td><td>2</td><td>A</td><td>F</td><td>S</td><td>Y</td><td>Q</td><td>N</td><td>R</td></tr><tr><td></td><td>2</td><td>G</td><td>F</td><td>S</td><td>Y</td><td>Q</td><td>N</td><td>T</td></tr><tr><td></td><td>1</td><td>G</td><td>Y</td><td>S</td><td>Y</td><td>Q</td><td>N</td><td>T</td></tr><tr><td></td><td>1</td><td>P</td><td>Y</td><td>A</td><td>I</td><td>Q</td><td>N</td><td>A</td></tr><tr><td></td><td>1</td><td>A</td><td>Y</td><td>A</td><td>T</td><td>Q</td><td>N</td><td>A</td></tr><tr><td></td><td>1</td><td>A</td><td>Y</td><td>A</td><td>I</td><td>K</td><td>N</td><td>A</td></tr><tr><td></td><td>1</td><td>V</td><td>F</td><td>A</td><td>I</td><td>Q</td><td>N</td><td>T</td></tr><tr><td></td><td>1</td><td>A</td><td>F</td><td>A</td><td>L</td><td>Q</td><td>N</td><td>A</td></tr><tr><td></td><td>1</td><td>A</td><td>F</td><td>S</td><td>I</td><td>Q</td><td>N</td><td>A</td></tr><tr><td></td><td>1</td><td>A</td><td>F</td><td>S</td><td>I</td><td>Q</td><td>N</td><td>T</td></tr><tr><td></td><td>1</td><td>A</td><td>F</td><td>A</td><td>N</td><td>Q</td><td>N</td><td>T</td></tr><tr><td></td><td>1</td><td>A</td><td>F</td><td>S</td><td>C</td><td>Q</td><td>N</td><td>T</td></tr><tr><td></td><td>1</td><td>A</td><td>F</td><td>N</td><td>I</td><td>Q</td><td>N</td><td>T</td></tr><tr><td></td><td>1</td><td>A</td><td>F</td><td>S</td><td>H</td><td>Q</td><td>N</td><td>T</td></tr><tr><td></td><td>1</td><td>A</td><td>F</td><td>S</td><td>Y</td><td>Q</td><td>N</td><td>S</td></tr><tr><td></td><td>1</td><td>P</td><td>F</td><td>S</td><td>Y</td><td>Q</td><td>N</td><td>T</td></tr><tr><td></td><td>1</td><td>A</td><td>F</td><td>A</td><td>F</td><td>Q</td><td>N</td><td>A</td></tr></table> | Residue |  |  |  |  |  |  |  | Type |  | 5 | 267 | 297 | 324 | 370 | 426 | 440 | a/FPV | N 846 | A | F | S | Y | Q | N | T |  | 591 | A | Y | A | I | Q | N | A |  | 398 | A | F | A | Y | Q | N | T |  | 229 | A | F | A | I | Q | N | T |  | 51 | A | F | A | Y | Q | N | A |  | 21 | A | Y | A | I | Q | N | T |  | 18 | A | F | A | L | Q | N | T |  | 18 | A | F | S | Y | Q | N | T |  | 17 | A | F | A | Y | Q | N | S |  | 11 | G | Y | A | Y | Q | N | T |  | 7 | A | F | A | I | Q | N | A |  | 6 | G | Y | A | I | Q | N | A |  | 6 | G | F | A | I | Q | N | T |  | 6 | A | F | A | I | R | N | T |  | 6 | A | F | N | Y | Q | N | T |  | 4 | G | F | A | Y | Q | N | T |  | 4 | A | F | N | Y | Q | N | A |  | 3 | A | Y | A | Y | Q | N | T |  | 2 | A | F | S | Y | Q | N | R |  | 2 | G | F | S | Y | Q | N | T |  | 1 | G | Y | S | Y | Q | N | T |  | 1 | P | Y | A | I | Q | N | A |  | 1 | A | Y | A | T | Q | N | A |  | 1 | A | Y | A | I | K | N | A |  | 1 | V | F | A | I | Q | N | T |  | 1 | A | F | A | L | Q | N | A |  | 1 | A | F | S | I | Q | N | A |  | 1 | A | F | S | I | Q | N | T |  | 1 | A | F | A | N | Q | N | T |  | 1 | A | F | S | C | Q | N | T |  | 1 | A | F | N | I | Q | N | T |  | 1 | A | F | S | H | Q | N | T |  | 1 | A | F | S | Y | Q | N | S |  | 1 | P | F | S | Y | Q | N | T |  | 1 | A | F | A | F | Q | N | A |
| Residue |                                                                                                                                                                                                                                                                                                                                                                                                                                                                                                                                                                                                                                                                                                                                                                                                                                                                                                                                                                                                                                                                                                                                                                                                                                                                                                                                                                                                                                                                                                          |              |     |     |     |     |     |     |    |      |     |     |     |     |     |     |     |     |   |       |   |   |   |   |   |   |   |   |     |   |   |                                                                                                                                                                                                                                                                                                                                                                                                                                                                                                                                                                                                                                                                                |         |   |   |   |  |   |    |     |     |     |     |   |   |   |   |    |   |   |   |   |    |   |   |   |   |    |   |   |   |   |   |   |   |   |   |   |   |   |   |   |   |   |   |   |   |   |   |   |   |   |   |   |   |   |   |   |   |   |  |   |   |   |   |   |   |   |   |   |   |   |   |   |   |   |   |   |  |   |   |   |   |   |   |   |   |  |   |   |   |   |   |   |   |   |  |   |   |   |   |   |   |   |   |                                                                                                                                                                                                                                                                                                                                                                                                                                                                                                                                                                                                                                                                                                                                                                                                                                                                                                                                                                                                                                                                                                                                                                                                                                                                                                                                                                                                                                                                                                                                                                                                                                                                                                                                                                                                                                                                                                                                                                                                                                                                                                                                                                                                                                                                                                                                                                                                                                                                                                                                                                                                                                                                                                                                                                                                                                                                                                                                                                                                                                                                                                                                                                                                                                                                                                                                                                                                                                                                                                                                                                                                                                                                |         |  |  |  |  |  |  |  |      |  |   |     |     |     |     |     |     |   |       |   |   |   |   |   |   |   |  |    |   |   |   |   |   |   |   |  |   |   |   |   |   |   |   |   |  |   |   |   |   |   |   |   |   |  |   |   |   |   |   |   |   |   |  |   |   |   |   |   |   |   |   |  |   |   |   |   |   |   |   |   |  |   |   |   |   |   |   |   |   |  |   |   |   |   |   |   |   |   |  |   |   |   |   |   |   |   |   |  |   |   |   |   |   |   |   |   |  |   |   |   |   |   |   |   |   |  |   |   |   |   |   |   |   |   |   |       |   |   |   |   |   |   |   |  |     |   |   |   |   |   |   |   |  |    |   |   |   |   |   |   |   |  |    |   |   |   |   |   |   |   |  |    |   |   |   |   |   |   |   |  |    |   |   |   |   |   |   |   |  |    |   |   |   |   |   |   |   |  |   |   |   |   |   |   |   |   |  |   |   |   |   |   |   |   |   |  |   |   |   |   |   |   |   |   |  |   |   |   |   |   |   |   |   |  |   |   |   |   |   |   |   |   |  |   |   |   |   |   |   |   |   |  |   |   |   |   |   |   |   |   |  |   |   |   |   |   |   |   |   |  |   |   |   |   |   |   |   |   |  |   |   |   |   |   |   |   |   |  |   |   |   |   |   |   |   |   |  |   |   |   |   |   |   |   |   |   |     |   |   |   |   |   |   |   |  |   |   |   |   |   |   |   |   |                                                                                                                                                                                                                                                                                                                                                                                                                                                                                                                                                                                                                                                                                                                                                                                                                                                                                                                                                                                                                                                                                                                                                                                                                                                                                                                                                                                                                                                                                                                                                                                                                                                                                                                                                                                                                                                                                                                                                                                                                                                                                                                                                                                                                                                                                                                                                                                                                                                                                                                                                                                                                                                                                                                                                                                                                                                                                                                                                                                                                                                                                                                                                                                                                                                                                                                                                                                                                                                                                                                                                                                                                                                                                                                                                                  |         |  |  |  |  |  |  |  |      |  |   |     |     |     |     |     |     |       |       |   |   |   |   |   |   |   |  |     |   |   |   |   |   |   |   |  |     |   |   |   |   |   |   |   |  |     |   |   |   |   |   |   |   |  |    |   |   |   |   |   |   |   |  |    |   |   |   |   |   |   |   |  |    |   |   |   |   |   |   |   |  |    |   |   |   |   |   |   |   |  |    |   |   |   |   |   |   |   |  |    |   |   |   |   |   |   |   |  |   |   |   |   |   |   |   |   |  |   |   |   |   |   |   |   |   |  |   |   |   |   |   |   |   |   |  |   |   |   |   |   |   |   |   |  |   |   |   |   |   |   |   |   |  |   |   |   |   |   |   |   |   |  |   |   |   |   |   |   |   |   |  |   |   |   |   |   |   |   |   |  |   |   |   |   |   |   |   |   |  |   |   |   |   |   |   |   |   |  |   |   |   |   |   |   |   |   |  |   |   |   |   |   |   |   |   |  |   |   |   |   |   |   |   |   |  |   |   |   |   |   |   |   |   |  |   |   |   |   |   |   |   |   |  |   |   |   |   |   |   |   |   |  |   |   |   |   |   |   |   |   |  |   |   |   |   |   |   |   |   |  |   |   |   |   |   |   |   |   |  |   |   |   |   |   |   |   |   |  |   |   |   |   |   |   |   |   |  |   |   |   |   |   |   |   |   |  |   |   |   |   |   |   |   |   |  |   |   |   |   |   |   |   |   |  |   |   |   |   |   |   |   |   |
| Type    |                                                                                                                                                                                                                                                                                                                                                                                                                                                                                                                                                                                                                                                                                                                                                                                                                                                                                                                                                                                                                                                                                                                                                                                                                                                                                                                                                                                                                                                                                                          | 5            | 267 | 297 | 324 | 370 | 426 | 440 |    |      |     |     |     |     |     |     |     |     |   |       |   |   |   |   |   |   |   |   |     |   |   |                                                                                                                                                                                                                                                                                                                                                                                                                                                                                                                                                                                                                                                                                |         |   |   |   |  |   |    |     |     |     |     |   |   |   |   |    |   |   |   |   |    |   |   |   |   |    |   |   |   |   |   |   |   |   |   |   |   |   |   |   |   |   |   |   |   |   |   |   |   |   |   |   |   |   |   |   |   |   |  |   |   |   |   |   |   |   |   |   |   |   |   |   |   |   |   |   |  |   |   |   |   |   |   |   |   |  |   |   |   |   |   |   |   |   |  |   |   |   |   |   |   |   |   |                                                                                                                                                                                                                                                                                                                                                                                                                                                                                                                                                                                                                                                                                                                                                                                                                                                                                                                                                                                                                                                                                                                                                                                                                                                                                                                                                                                                                                                                                                                                                                                                                                                                                                                                                                                                                                                                                                                                                                                                                                                                                                                                                                                                                                                                                                                                                                                                                                                                                                                                                                                                                                                                                                                                                                                                                                                                                                                                                                                                                                                                                                                                                                                                                                                                                                                                                                                                                                                                                                                                                                                                                                                                |         |  |  |  |  |  |  |  |      |  |   |     |     |     |     |     |     |   |       |   |   |   |   |   |   |   |  |    |   |   |   |   |   |   |   |  |   |   |   |   |   |   |   |   |  |   |   |   |   |   |   |   |   |  |   |   |   |   |   |   |   |   |  |   |   |   |   |   |   |   |   |  |   |   |   |   |   |   |   |   |  |   |   |   |   |   |   |   |   |  |   |   |   |   |   |   |   |   |  |   |   |   |   |   |   |   |   |  |   |   |   |   |   |   |   |   |  |   |   |   |   |   |   |   |   |  |   |   |   |   |   |   |   |   |   |       |   |   |   |   |   |   |   |  |     |   |   |   |   |   |   |   |  |    |   |   |   |   |   |   |   |  |    |   |   |   |   |   |   |   |  |    |   |   |   |   |   |   |   |  |    |   |   |   |   |   |   |   |  |    |   |   |   |   |   |   |   |  |   |   |   |   |   |   |   |   |  |   |   |   |   |   |   |   |   |  |   |   |   |   |   |   |   |   |  |   |   |   |   |   |   |   |   |  |   |   |   |   |   |   |   |   |  |   |   |   |   |   |   |   |   |  |   |   |   |   |   |   |   |   |  |   |   |   |   |   |   |   |   |  |   |   |   |   |   |   |   |   |  |   |   |   |   |   |   |   |   |  |   |   |   |   |   |   |   |   |  |   |   |   |   |   |   |   |   |   |     |   |   |   |   |   |   |   |  |   |   |   |   |   |   |   |   |                                                                                                                                                                                                                                                                                                                                                                                                                                                                                                                                                                                                                                                                                                                                                                                                                                                                                                                                                                                                                                                                                                                                                                                                                                                                                                                                                                                                                                                                                                                                                                                                                                                                                                                                                                                                                                                                                                                                                                                                                                                                                                                                                                                                                                                                                                                                                                                                                                                                                                                                                                                                                                                                                                                                                                                                                                                                                                                                                                                                                                                                                                                                                                                                                                                                                                                                                                                                                                                                                                                                                                                                                                                                                                                                                                  |         |  |  |  |  |  |  |  |      |  |   |     |     |     |     |     |     |       |       |   |   |   |   |   |   |   |  |     |   |   |   |   |   |   |   |  |     |   |   |   |   |   |   |   |  |     |   |   |   |   |   |   |   |  |    |   |   |   |   |   |   |   |  |    |   |   |   |   |   |   |   |  |    |   |   |   |   |   |   |   |  |    |   |   |   |   |   |   |   |  |    |   |   |   |   |   |   |   |  |    |   |   |   |   |   |   |   |  |   |   |   |   |   |   |   |   |  |   |   |   |   |   |   |   |   |  |   |   |   |   |   |   |   |   |  |   |   |   |   |   |   |   |   |  |   |   |   |   |   |   |   |   |  |   |   |   |   |   |   |   |   |  |   |   |   |   |   |   |   |   |  |   |   |   |   |   |   |   |   |  |   |   |   |   |   |   |   |   |  |   |   |   |   |   |   |   |   |  |   |   |   |   |   |   |   |   |  |   |   |   |   |   |   |   |   |  |   |   |   |   |   |   |   |   |  |   |   |   |   |   |   |   |   |  |   |   |   |   |   |   |   |   |  |   |   |   |   |   |   |   |   |  |   |   |   |   |   |   |   |   |  |   |   |   |   |   |   |   |   |  |   |   |   |   |   |   |   |   |  |   |   |   |   |   |   |   |   |  |   |   |   |   |   |   |   |   |  |   |   |   |   |   |   |   |   |  |   |   |   |   |   |   |   |   |  |   |   |   |   |   |   |   |   |  |   |   |   |   |   |   |   |   |
| c       | N 368                                                                                                                                                                                                                                                                                                                                                                                                                                                                                                                                                                                                                                                                                                                                                                                                                                                                                                                                                                                                                                                                                                                                                                                                                                                                                                                                                                                                                                                                                                    | G            | Y   | A   | I   | R   | E   | T   |    |      |     |     |     |     |     |     |     |     |   |       |   |   |   |   |   |   |   |   |     |   |   |                                                                                                                                                                                                                                                                                                                                                                                                                                                                                                                                                                                                                                                                                |         |   |   |   |  |   |    |     |     |     |     |   |   |   |   |    |   |   |   |   |    |   |   |   |   |    |   |   |   |   |   |   |   |   |   |   |   |   |   |   |   |   |   |   |   |   |   |   |   |   |   |   |   |   |   |   |   |   |  |   |   |   |   |   |   |   |   |   |   |   |   |   |   |   |   |   |  |   |   |   |   |   |   |   |   |  |   |   |   |   |   |   |   |   |  |   |   |   |   |   |   |   |   |                                                                                                                                                                                                                                                                                                                                                                                                                                                                                                                                                                                                                                                                                                                                                                                                                                                                                                                                                                                                                                                                                                                                                                                                                                                                                                                                                                                                                                                                                                                                                                                                                                                                                                                                                                                                                                                                                                                                                                                                                                                                                                                                                                                                                                                                                                                                                                                                                                                                                                                                                                                                                                                                                                                                                                                                                                                                                                                                                                                                                                                                                                                                                                                                                                                                                                                                                                                                                                                                                                                                                                                                                                                                |         |  |  |  |  |  |  |  |      |  |   |     |     |     |     |     |     |   |       |   |   |   |   |   |   |   |  |    |   |   |   |   |   |   |   |  |   |   |   |   |   |   |   |   |  |   |   |   |   |   |   |   |   |  |   |   |   |   |   |   |   |   |  |   |   |   |   |   |   |   |   |  |   |   |   |   |   |   |   |   |  |   |   |   |   |   |   |   |   |  |   |   |   |   |   |   |   |   |  |   |   |   |   |   |   |   |   |  |   |   |   |   |   |   |   |   |  |   |   |   |   |   |   |   |   |  |   |   |   |   |   |   |   |   |   |       |   |   |   |   |   |   |   |  |     |   |   |   |   |   |   |   |  |    |   |   |   |   |   |   |   |  |    |   |   |   |   |   |   |   |  |    |   |   |   |   |   |   |   |  |    |   |   |   |   |   |   |   |  |    |   |   |   |   |   |   |   |  |   |   |   |   |   |   |   |   |  |   |   |   |   |   |   |   |   |  |   |   |   |   |   |   |   |   |  |   |   |   |   |   |   |   |   |  |   |   |   |   |   |   |   |   |  |   |   |   |   |   |   |   |   |  |   |   |   |   |   |   |   |   |  |   |   |   |   |   |   |   |   |  |   |   |   |   |   |   |   |   |  |   |   |   |   |   |   |   |   |  |   |   |   |   |   |   |   |   |  |   |   |   |   |   |   |   |   |   |     |   |   |   |   |   |   |   |  |   |   |   |   |   |   |   |   |                                                                                                                                                                                                                                                                                                                                                                                                                                                                                                                                                                                                                                                                                                                                                                                                                                                                                                                                                                                                                                                                                                                                                                                                                                                                                                                                                                                                                                                                                                                                                                                                                                                                                                                                                                                                                                                                                                                                                                                                                                                                                                                                                                                                                                                                                                                                                                                                                                                                                                                                                                                                                                                                                                                                                                                                                                                                                                                                                                                                                                                                                                                                                                                                                                                                                                                                                                                                                                                                                                                                                                                                                                                                                                                                                                  |         |  |  |  |  |  |  |  |      |  |   |     |     |     |     |     |     |       |       |   |   |   |   |   |   |   |  |     |   |   |   |   |   |   |   |  |     |   |   |   |   |   |   |   |  |     |   |   |   |   |   |   |   |  |    |   |   |   |   |   |   |   |  |    |   |   |   |   |   |   |   |  |    |   |   |   |   |   |   |   |  |    |   |   |   |   |   |   |   |  |    |   |   |   |   |   |   |   |  |    |   |   |   |   |   |   |   |  |   |   |   |   |   |   |   |   |  |   |   |   |   |   |   |   |   |  |   |   |   |   |   |   |   |   |  |   |   |   |   |   |   |   |   |  |   |   |   |   |   |   |   |   |  |   |   |   |   |   |   |   |   |  |   |   |   |   |   |   |   |   |  |   |   |   |   |   |   |   |   |  |   |   |   |   |   |   |   |   |  |   |   |   |   |   |   |   |   |  |   |   |   |   |   |   |   |   |  |   |   |   |   |   |   |   |   |  |   |   |   |   |   |   |   |   |  |   |   |   |   |   |   |   |   |  |   |   |   |   |   |   |   |   |  |   |   |   |   |   |   |   |   |  |   |   |   |   |   |   |   |   |  |   |   |   |   |   |   |   |   |  |   |   |   |   |   |   |   |   |  |   |   |   |   |   |   |   |   |  |   |   |   |   |   |   |   |   |  |   |   |   |   |   |   |   |   |  |   |   |   |   |   |   |   |   |  |   |   |   |   |   |   |   |   |  |   |   |   |   |   |   |   |   |
|         | 111                                                                                                                                                                                                                                                                                                                                                                                                                                                                                                                                                                                                                                                                                                                                                                                                                                                                                                                                                                                                                                                                                                                                                                                                                                                                                                                                                                                                                                                                                                      | A            | Y   | A   | I   | R   | E   | T   |    |      |     |     |     |     |     |     |     |     |   |       |   |   |   |   |   |   |   |   |     |   |   |                                                                                                                                                                                                                                                                                                                                                                                                                                                                                                                                                                                                                                                                                |         |   |   |   |  |   |    |     |     |     |     |   |   |   |   |    |   |   |   |   |    |   |   |   |   |    |   |   |   |   |   |   |   |   |   |   |   |   |   |   |   |   |   |   |   |   |   |   |   |   |   |   |   |   |   |   |   |   |  |   |   |   |   |   |   |   |   |   |   |   |   |   |   |   |   |   |  |   |   |   |   |   |   |   |   |  |   |   |   |   |   |   |   |   |  |   |   |   |   |   |   |   |   |                                                                                                                                                                                                                                                                                                                                                                                                                                                                                                                                                                                                                                                                                                                                                                                                                                                                                                                                                                                                                                                                                                                                                                                                                                                                                                                                                                                                                                                                                                                                                                                                                                                                                                                                                                                                                                                                                                                                                                                                                                                                                                                                                                                                                                                                                                                                                                                                                                                                                                                                                                                                                                                                                                                                                                                                                                                                                                                                                                                                                                                                                                                                                                                                                                                                                                                                                                                                                                                                                                                                                                                                                                                                |         |  |  |  |  |  |  |  |      |  |   |     |     |     |     |     |     |   |       |   |   |   |   |   |   |   |  |    |   |   |   |   |   |   |   |  |   |   |   |   |   |   |   |   |  |   |   |   |   |   |   |   |   |  |   |   |   |   |   |   |   |   |  |   |   |   |   |   |   |   |   |  |   |   |   |   |   |   |   |   |  |   |   |   |   |   |   |   |   |  |   |   |   |   |   |   |   |   |  |   |   |   |   |   |   |   |   |  |   |   |   |   |   |   |   |   |  |   |   |   |   |   |   |   |   |  |   |   |   |   |   |   |   |   |   |       |   |   |   |   |   |   |   |  |     |   |   |   |   |   |   |   |  |    |   |   |   |   |   |   |   |  |    |   |   |   |   |   |   |   |  |    |   |   |   |   |   |   |   |  |    |   |   |   |   |   |   |   |  |    |   |   |   |   |   |   |   |  |   |   |   |   |   |   |   |   |  |   |   |   |   |   |   |   |   |  |   |   |   |   |   |   |   |   |  |   |   |   |   |   |   |   |   |  |   |   |   |   |   |   |   |   |  |   |   |   |   |   |   |   |   |  |   |   |   |   |   |   |   |   |  |   |   |   |   |   |   |   |   |  |   |   |   |   |   |   |   |   |  |   |   |   |   |   |   |   |   |  |   |   |   |   |   |   |   |   |  |   |   |   |   |   |   |   |   |   |     |   |   |   |   |   |   |   |  |   |   |   |   |   |   |   |   |                                                                                                                                                                                                                                                                                                                                                                                                                                                                                                                                                                                                                                                                                                                                                                                                                                                                                                                                                                                                                                                                                                                                                                                                                                                                                                                                                                                                                                                                                                                                                                                                                                                                                                                                                                                                                                                                                                                                                                                                                                                                                                                                                                                                                                                                                                                                                                                                                                                                                                                                                                                                                                                                                                                                                                                                                                                                                                                                                                                                                                                                                                                                                                                                                                                                                                                                                                                                                                                                                                                                                                                                                                                                                                                                                                  |         |  |  |  |  |  |  |  |      |  |   |     |     |     |     |     |     |       |       |   |   |   |   |   |   |   |  |     |   |   |   |   |   |   |   |  |     |   |   |   |   |   |   |   |  |     |   |   |   |   |   |   |   |  |    |   |   |   |   |   |   |   |  |    |   |   |   |   |   |   |   |  |    |   |   |   |   |   |   |   |  |    |   |   |   |   |   |   |   |  |    |   |   |   |   |   |   |   |  |    |   |   |   |   |   |   |   |  |   |   |   |   |   |   |   |   |  |   |   |   |   |   |   |   |   |  |   |   |   |   |   |   |   |   |  |   |   |   |   |   |   |   |   |  |   |   |   |   |   |   |   |   |  |   |   |   |   |   |   |   |   |  |   |   |   |   |   |   |   |   |  |   |   |   |   |   |   |   |   |  |   |   |   |   |   |   |   |   |  |   |   |   |   |   |   |   |   |  |   |   |   |   |   |   |   |   |  |   |   |   |   |   |   |   |   |  |   |   |   |   |   |   |   |   |  |   |   |   |   |   |   |   |   |  |   |   |   |   |   |   |   |   |  |   |   |   |   |   |   |   |   |  |   |   |   |   |   |   |   |   |  |   |   |   |   |   |   |   |   |  |   |   |   |   |   |   |   |   |  |   |   |   |   |   |   |   |   |  |   |   |   |   |   |   |   |   |  |   |   |   |   |   |   |   |   |  |   |   |   |   |   |   |   |   |  |   |   |   |   |   |   |   |   |  |   |   |   |   |   |   |   |   |
|         | 6                                                                                                                                                                                                                                                                                                                                                                                                                                                                                                                                                                                                                                                                                                                                                                                                                                                                                                                                                                                                                                                                                                                                                                                                                                                                                                                                                                                                                                                                                                        | G            | Y   | A   | I   | Q   | E   | T   |    |      |     |     |     |     |     |     |     |     |   |       |   |   |   |   |   |   |   |   |     |   |   |                                                                                                                                                                                                                                                                                                                                                                                                                                                                                                                                                                                                                                                                                |         |   |   |   |  |   |    |     |     |     |     |   |   |   |   |    |   |   |   |   |    |   |   |   |   |    |   |   |   |   |   |   |   |   |   |   |   |   |   |   |   |   |   |   |   |   |   |   |   |   |   |   |   |   |   |   |   |   |  |   |   |   |   |   |   |   |   |   |   |   |   |   |   |   |   |   |  |   |   |   |   |   |   |   |   |  |   |   |   |   |   |   |   |   |  |   |   |   |   |   |   |   |   |                                                                                                                                                                                                                                                                                                                                                                                                                                                                                                                                                                                                                                                                                                                                                                                                                                                                                                                                                                                                                                                                                                                                                                                                                                                                                                                                                                                                                                                                                                                                                                                                                                                                                                                                                                                                                                                                                                                                                                                                                                                                                                                                                                                                                                                                                                                                                                                                                                                                                                                                                                                                                                                                                                                                                                                                                                                                                                                                                                                                                                                                                                                                                                                                                                                                                                                                                                                                                                                                                                                                                                                                                                                                |         |  |  |  |  |  |  |  |      |  |   |     |     |     |     |     |     |   |       |   |   |   |   |   |   |   |  |    |   |   |   |   |   |   |   |  |   |   |   |   |   |   |   |   |  |   |   |   |   |   |   |   |   |  |   |   |   |   |   |   |   |   |  |   |   |   |   |   |   |   |   |  |   |   |   |   |   |   |   |   |  |   |   |   |   |   |   |   |   |  |   |   |   |   |   |   |   |   |  |   |   |   |   |   |   |   |   |  |   |   |   |   |   |   |   |   |  |   |   |   |   |   |   |   |   |  |   |   |   |   |   |   |   |   |   |       |   |   |   |   |   |   |   |  |     |   |   |   |   |   |   |   |  |    |   |   |   |   |   |   |   |  |    |   |   |   |   |   |   |   |  |    |   |   |   |   |   |   |   |  |    |   |   |   |   |   |   |   |  |    |   |   |   |   |   |   |   |  |   |   |   |   |   |   |   |   |  |   |   |   |   |   |   |   |   |  |   |   |   |   |   |   |   |   |  |   |   |   |   |   |   |   |   |  |   |   |   |   |   |   |   |   |  |   |   |   |   |   |   |   |   |  |   |   |   |   |   |   |   |   |  |   |   |   |   |   |   |   |   |  |   |   |   |   |   |   |   |   |  |   |   |   |   |   |   |   |   |  |   |   |   |   |   |   |   |   |  |   |   |   |   |   |   |   |   |   |     |   |   |   |   |   |   |   |  |   |   |   |   |   |   |   |   |                                                                                                                                                                                                                                                                                                                                                                                                                                                                                                                                                                                                                                                                                                                                                                                                                                                                                                                                                                                                                                                                                                                                                                                                                                                                                                                                                                                                                                                                                                                                                                                                                                                                                                                                                                                                                                                                                                                                                                                                                                                                                                                                                                                                                                                                                                                                                                                                                                                                                                                                                                                                                                                                                                                                                                                                                                                                                                                                                                                                                                                                                                                                                                                                                                                                                                                                                                                                                                                                                                                                                                                                                                                                                                                                                                  |         |  |  |  |  |  |  |  |      |  |   |     |     |     |     |     |     |       |       |   |   |   |   |   |   |   |  |     |   |   |   |   |   |   |   |  |     |   |   |   |   |   |   |   |  |     |   |   |   |   |   |   |   |  |    |   |   |   |   |   |   |   |  |    |   |   |   |   |   |   |   |  |    |   |   |   |   |   |   |   |  |    |   |   |   |   |   |   |   |  |    |   |   |   |   |   |   |   |  |    |   |   |   |   |   |   |   |  |   |   |   |   |   |   |   |   |  |   |   |   |   |   |   |   |   |  |   |   |   |   |   |   |   |   |  |   |   |   |   |   |   |   |   |  |   |   |   |   |   |   |   |   |  |   |   |   |   |   |   |   |   |  |   |   |   |   |   |   |   |   |  |   |   |   |   |   |   |   |   |  |   |   |   |   |   |   |   |   |  |   |   |   |   |   |   |   |   |  |   |   |   |   |   |   |   |   |  |   |   |   |   |   |   |   |   |  |   |   |   |   |   |   |   |   |  |   |   |   |   |   |   |   |   |  |   |   |   |   |   |   |   |   |  |   |   |   |   |   |   |   |   |  |   |   |   |   |   |   |   |   |  |   |   |   |   |   |   |   |   |  |   |   |   |   |   |   |   |   |  |   |   |   |   |   |   |   |   |  |   |   |   |   |   |   |   |   |  |   |   |   |   |   |   |   |   |  |   |   |   |   |   |   |   |   |  |   |   |   |   |   |   |   |   |  |   |   |   |   |   |   |   |   |
|         | 4                                                                                                                                                                                                                                                                                                                                                                                                                                                                                                                                                                                                                                                                                                                                                                                                                                                                                                                                                                                                                                                                                                                                                                                                                                                                                                                                                                                                                                                                                                        | A            | Y   | A   | I   | Q   | E   | T   |    |      |     |     |     |     |     |     |     |     |   |       |   |   |   |   |   |   |   |   |     |   |   |                                                                                                                                                                                                                                                                                                                                                                                                                                                                                                                                                                                                                                                                                |         |   |   |   |  |   |    |     |     |     |     |   |   |   |   |    |   |   |   |   |    |   |   |   |   |    |   |   |   |   |   |   |   |   |   |   |   |   |   |   |   |   |   |   |   |   |   |   |   |   |   |   |   |   |   |   |   |   |  |   |   |   |   |   |   |   |   |   |   |   |   |   |   |   |   |   |  |   |   |   |   |   |   |   |   |  |   |   |   |   |   |   |   |   |  |   |   |   |   |   |   |   |   |                                                                                                                                                                                                                                                                                                                                                                                                                                                                                                                                                                                                                                                                                                                                                                                                                                                                                                                                                                                                                                                                                                                                                                                                                                                                                                                                                                                                                                                                                                                                                                                                                                                                                                                                                                                                                                                                                                                                                                                                                                                                                                                                                                                                                                                                                                                                                                                                                                                                                                                                                                                                                                                                                                                                                                                                                                                                                                                                                                                                                                                                                                                                                                                                                                                                                                                                                                                                                                                                                                                                                                                                                                                                |         |  |  |  |  |  |  |  |      |  |   |     |     |     |     |     |     |   |       |   |   |   |   |   |   |   |  |    |   |   |   |   |   |   |   |  |   |   |   |   |   |   |   |   |  |   |   |   |   |   |   |   |   |  |   |   |   |   |   |   |   |   |  |   |   |   |   |   |   |   |   |  |   |   |   |   |   |   |   |   |  |   |   |   |   |   |   |   |   |  |   |   |   |   |   |   |   |   |  |   |   |   |   |   |   |   |   |  |   |   |   |   |   |   |   |   |  |   |   |   |   |   |   |   |   |  |   |   |   |   |   |   |   |   |   |       |   |   |   |   |   |   |   |  |     |   |   |   |   |   |   |   |  |    |   |   |   |   |   |   |   |  |    |   |   |   |   |   |   |   |  |    |   |   |   |   |   |   |   |  |    |   |   |   |   |   |   |   |  |    |   |   |   |   |   |   |   |  |   |   |   |   |   |   |   |   |  |   |   |   |   |   |   |   |   |  |   |   |   |   |   |   |   |   |  |   |   |   |   |   |   |   |   |  |   |   |   |   |   |   |   |   |  |   |   |   |   |   |   |   |   |  |   |   |   |   |   |   |   |   |  |   |   |   |   |   |   |   |   |  |   |   |   |   |   |   |   |   |  |   |   |   |   |   |   |   |   |  |   |   |   |   |   |   |   |   |  |   |   |   |   |   |   |   |   |   |     |   |   |   |   |   |   |   |  |   |   |   |   |   |   |   |   |                                                                                                                                                                                                                                                                                                                                                                                                                                                                                                                                                                                                                                                                                                                                                                                                                                                                                                                                                                                                                                                                                                                                                                                                                                                                                                                                                                                                                                                                                                                                                                                                                                                                                                                                                                                                                                                                                                                                                                                                                                                                                                                                                                                                                                                                                                                                                                                                                                                                                                                                                                                                                                                                                                                                                                                                                                                                                                                                                                                                                                                                                                                                                                                                                                                                                                                                                                                                                                                                                                                                                                                                                                                                                                                                                                  |         |  |  |  |  |  |  |  |      |  |   |     |     |     |     |     |     |       |       |   |   |   |   |   |   |   |  |     |   |   |   |   |   |   |   |  |     |   |   |   |   |   |   |   |  |     |   |   |   |   |   |   |   |  |    |   |   |   |   |   |   |   |  |    |   |   |   |   |   |   |   |  |    |   |   |   |   |   |   |   |  |    |   |   |   |   |   |   |   |  |    |   |   |   |   |   |   |   |  |    |   |   |   |   |   |   |   |  |   |   |   |   |   |   |   |   |  |   |   |   |   |   |   |   |   |  |   |   |   |   |   |   |   |   |  |   |   |   |   |   |   |   |   |  |   |   |   |   |   |   |   |   |  |   |   |   |   |   |   |   |   |  |   |   |   |   |   |   |   |   |  |   |   |   |   |   |   |   |   |  |   |   |   |   |   |   |   |   |  |   |   |   |   |   |   |   |   |  |   |   |   |   |   |   |   |   |  |   |   |   |   |   |   |   |   |  |   |   |   |   |   |   |   |   |  |   |   |   |   |   |   |   |   |  |   |   |   |   |   |   |   |   |  |   |   |   |   |   |   |   |   |  |   |   |   |   |   |   |   |   |  |   |   |   |   |   |   |   |   |  |   |   |   |   |   |   |   |   |  |   |   |   |   |   |   |   |   |  |   |   |   |   |   |   |   |   |  |   |   |   |   |   |   |   |   |  |   |   |   |   |   |   |   |   |  |   |   |   |   |   |   |   |   |  |   |   |   |   |   |   |   |   |
|         | 1                                                                                                                                                                                                                                                                                                                                                                                                                                                                                                                                                                                                                                                                                                                                                                                                                                                                                                                                                                                                                                                                                                                                                                                                                                                                                                                                                                                                                                                                                                        | G            | Y   | A   | I   | R   | E   | A   |    |      |     |     |     |     |     |     |     |     |   |       |   |   |   |   |   |   |   |   |     |   |   |                                                                                                                                                                                                                                                                                                                                                                                                                                                                                                                                                                                                                                                                                |         |   |   |   |  |   |    |     |     |     |     |   |   |   |   |    |   |   |   |   |    |   |   |   |   |    |   |   |   |   |   |   |   |   |   |   |   |   |   |   |   |   |   |   |   |   |   |   |   |   |   |   |   |   |   |   |   |   |  |   |   |   |   |   |   |   |   |   |   |   |   |   |   |   |   |   |  |   |   |   |   |   |   |   |   |  |   |   |   |   |   |   |   |   |  |   |   |   |   |   |   |   |   |                                                                                                                                                                                                                                                                                                                                                                                                                                                                                                                                                                                                                                                                                                                                                                                                                                                                                                                                                                                                                                                                                                                                                                                                                                                                                                                                                                                                                                                                                                                                                                                                                                                                                                                                                                                                                                                                                                                                                                                                                                                                                                                                                                                                                                                                                                                                                                                                                                                                                                                                                                                                                                                                                                                                                                                                                                                                                                                                                                                                                                                                                                                                                                                                                                                                                                                                                                                                                                                                                                                                                                                                                                                                |         |  |  |  |  |  |  |  |      |  |   |     |     |     |     |     |     |   |       |   |   |   |   |   |   |   |  |    |   |   |   |   |   |   |   |  |   |   |   |   |   |   |   |   |  |   |   |   |   |   |   |   |   |  |   |   |   |   |   |   |   |   |  |   |   |   |   |   |   |   |   |  |   |   |   |   |   |   |   |   |  |   |   |   |   |   |   |   |   |  |   |   |   |   |   |   |   |   |  |   |   |   |   |   |   |   |   |  |   |   |   |   |   |   |   |   |  |   |   |   |   |   |   |   |   |  |   |   |   |   |   |   |   |   |   |       |   |   |   |   |   |   |   |  |     |   |   |   |   |   |   |   |  |    |   |   |   |   |   |   |   |  |    |   |   |   |   |   |   |   |  |    |   |   |   |   |   |   |   |  |    |   |   |   |   |   |   |   |  |    |   |   |   |   |   |   |   |  |   |   |   |   |   |   |   |   |  |   |   |   |   |   |   |   |   |  |   |   |   |   |   |   |   |   |  |   |   |   |   |   |   |   |   |  |   |   |   |   |   |   |   |   |  |   |   |   |   |   |   |   |   |  |   |   |   |   |   |   |   |   |  |   |   |   |   |   |   |   |   |  |   |   |   |   |   |   |   |   |  |   |   |   |   |   |   |   |   |  |   |   |   |   |   |   |   |   |  |   |   |   |   |   |   |   |   |   |     |   |   |   |   |   |   |   |  |   |   |   |   |   |   |   |   |                                                                                                                                                                                                                                                                                                                                                                                                                                                                                                                                                                                                                                                                                                                                                                                                                                                                                                                                                                                                                                                                                                                                                                                                                                                                                                                                                                                                                                                                                                                                                                                                                                                                                                                                                                                                                                                                                                                                                                                                                                                                                                                                                                                                                                                                                                                                                                                                                                                                                                                                                                                                                                                                                                                                                                                                                                                                                                                                                                                                                                                                                                                                                                                                                                                                                                                                                                                                                                                                                                                                                                                                                                                                                                                                                                  |         |  |  |  |  |  |  |  |      |  |   |     |     |     |     |     |     |       |       |   |   |   |   |   |   |   |  |     |   |   |   |   |   |   |   |  |     |   |   |   |   |   |   |   |  |     |   |   |   |   |   |   |   |  |    |   |   |   |   |   |   |   |  |    |   |   |   |   |   |   |   |  |    |   |   |   |   |   |   |   |  |    |   |   |   |   |   |   |   |  |    |   |   |   |   |   |   |   |  |    |   |   |   |   |   |   |   |  |   |   |   |   |   |   |   |   |  |   |   |   |   |   |   |   |   |  |   |   |   |   |   |   |   |   |  |   |   |   |   |   |   |   |   |  |   |   |   |   |   |   |   |   |  |   |   |   |   |   |   |   |   |  |   |   |   |   |   |   |   |   |  |   |   |   |   |   |   |   |   |  |   |   |   |   |   |   |   |   |  |   |   |   |   |   |   |   |   |  |   |   |   |   |   |   |   |   |  |   |   |   |   |   |   |   |   |  |   |   |   |   |   |   |   |   |  |   |   |   |   |   |   |   |   |  |   |   |   |   |   |   |   |   |  |   |   |   |   |   |   |   |   |  |   |   |   |   |   |   |   |   |  |   |   |   |   |   |   |   |   |  |   |   |   |   |   |   |   |   |  |   |   |   |   |   |   |   |   |  |   |   |   |   |   |   |   |   |  |   |   |   |   |   |   |   |   |  |   |   |   |   |   |   |   |   |  |   |   |   |   |   |   |   |   |  |   |   |   |   |   |   |   |   |
|         | 1                                                                                                                                                                                                                                                                                                                                                                                                                                                                                                                                                                                                                                                                                                                                                                                                                                                                                                                                                                                                                                                                                                                                                                                                                                                                                                                                                                                                                                                                                                        | G            | Y   | A   | L   | R   | E   | T   |    |      |     |     |     |     |     |     |     |     |   |       |   |   |   |   |   |   |   |   |     |   |   |                                                                                                                                                                                                                                                                                                                                                                                                                                                                                                                                                                                                                                                                                |         |   |   |   |  |   |    |     |     |     |     |   |   |   |   |    |   |   |   |   |    |   |   |   |   |    |   |   |   |   |   |   |   |   |   |   |   |   |   |   |   |   |   |   |   |   |   |   |   |   |   |   |   |   |   |   |   |   |  |   |   |   |   |   |   |   |   |   |   |   |   |   |   |   |   |   |  |   |   |   |   |   |   |   |   |  |   |   |   |   |   |   |   |   |  |   |   |   |   |   |   |   |   |                                                                                                                                                                                                                                                                                                                                                                                                                                                                                                                                                                                                                                                                                                                                                                                                                                                                                                                                                                                                                                                                                                                                                                                                                                                                                                                                                                                                                                                                                                                                                                                                                                                                                                                                                                                                                                                                                                                                                                                                                                                                                                                                                                                                                                                                                                                                                                                                                                                                                                                                                                                                                                                                                                                                                                                                                                                                                                                                                                                                                                                                                                                                                                                                                                                                                                                                                                                                                                                                                                                                                                                                                                                                |         |  |  |  |  |  |  |  |      |  |   |     |     |     |     |     |     |   |       |   |   |   |   |   |   |   |  |    |   |   |   |   |   |   |   |  |   |   |   |   |   |   |   |   |  |   |   |   |   |   |   |   |   |  |   |   |   |   |   |   |   |   |  |   |   |   |   |   |   |   |   |  |   |   |   |   |   |   |   |   |  |   |   |   |   |   |   |   |   |  |   |   |   |   |   |   |   |   |  |   |   |   |   |   |   |   |   |  |   |   |   |   |   |   |   |   |  |   |   |   |   |   |   |   |   |  |   |   |   |   |   |   |   |   |   |       |   |   |   |   |   |   |   |  |     |   |   |   |   |   |   |   |  |    |   |   |   |   |   |   |   |  |    |   |   |   |   |   |   |   |  |    |   |   |   |   |   |   |   |  |    |   |   |   |   |   |   |   |  |    |   |   |   |   |   |   |   |  |   |   |   |   |   |   |   |   |  |   |   |   |   |   |   |   |   |  |   |   |   |   |   |   |   |   |  |   |   |   |   |   |   |   |   |  |   |   |   |   |   |   |   |   |  |   |   |   |   |   |   |   |   |  |   |   |   |   |   |   |   |   |  |   |   |   |   |   |   |   |   |  |   |   |   |   |   |   |   |   |  |   |   |   |   |   |   |   |   |  |   |   |   |   |   |   |   |   |  |   |   |   |   |   |   |   |   |   |     |   |   |   |   |   |   |   |  |   |   |   |   |   |   |   |   |                                                                                                                                                                                                                                                                                                                                                                                                                                                                                                                                                                                                                                                                                                                                                                                                                                                                                                                                                                                                                                                                                                                                                                                                                                                                                                                                                                                                                                                                                                                                                                                                                                                                                                                                                                                                                                                                                                                                                                                                                                                                                                                                                                                                                                                                                                                                                                                                                                                                                                                                                                                                                                                                                                                                                                                                                                                                                                                                                                                                                                                                                                                                                                                                                                                                                                                                                                                                                                                                                                                                                                                                                                                                                                                                                                  |         |  |  |  |  |  |  |  |      |  |   |     |     |     |     |     |     |       |       |   |   |   |   |   |   |   |  |     |   |   |   |   |   |   |   |  |     |   |   |   |   |   |   |   |  |     |   |   |   |   |   |   |   |  |    |   |   |   |   |   |   |   |  |    |   |   |   |   |   |   |   |  |    |   |   |   |   |   |   |   |  |    |   |   |   |   |   |   |   |  |    |   |   |   |   |   |   |   |  |    |   |   |   |   |   |   |   |  |   |   |   |   |   |   |   |   |  |   |   |   |   |   |   |   |   |  |   |   |   |   |   |   |   |   |  |   |   |   |   |   |   |   |   |  |   |   |   |   |   |   |   |   |  |   |   |   |   |   |   |   |   |  |   |   |   |   |   |   |   |   |  |   |   |   |   |   |   |   |   |  |   |   |   |   |   |   |   |   |  |   |   |   |   |   |   |   |   |  |   |   |   |   |   |   |   |   |  |   |   |   |   |   |   |   |   |  |   |   |   |   |   |   |   |   |  |   |   |   |   |   |   |   |   |  |   |   |   |   |   |   |   |   |  |   |   |   |   |   |   |   |   |  |   |   |   |   |   |   |   |   |  |   |   |   |   |   |   |   |   |  |   |   |   |   |   |   |   |   |  |   |   |   |   |   |   |   |   |  |   |   |   |   |   |   |   |   |  |   |   |   |   |   |   |   |   |  |   |   |   |   |   |   |   |   |  |   |   |   |   |   |   |   |   |  |   |   |   |   |   |   |   |   |
| b       | 1                                                                                                                                                                                                                                                                                                                                                                                                                                                                                                                                                                                                                                                                                                                                                                                                                                                                                                                                                                                                                                                                                                                                                                                                                                                                                                                                                                                                                                                                                                        | G            | Y   | A   | I   | R   | D   | T   |    |      |     |     |     |     |     |     |     |     |   |       |   |   |   |   |   |   |   |   |     |   |   |                                                                                                                                                                                                                                                                                                                                                                                                                                                                                                                                                                                                                                                                                |         |   |   |   |  |   |    |     |     |     |     |   |   |   |   |    |   |   |   |   |    |   |   |   |   |    |   |   |   |   |   |   |   |   |   |   |   |   |   |   |   |   |   |   |   |   |   |   |   |   |   |   |   |   |   |   |   |   |  |   |   |   |   |   |   |   |   |   |   |   |   |   |   |   |   |   |  |   |   |   |   |   |   |   |   |  |   |   |   |   |   |   |   |   |  |   |   |   |   |   |   |   |   |                                                                                                                                                                                                                                                                                                                                                                                                                                                                                                                                                                                                                                                                                                                                                                                                                                                                                                                                                                                                                                                                                                                                                                                                                                                                                                                                                                                                                                                                                                                                                                                                                                                                                                                                                                                                                                                                                                                                                                                                                                                                                                                                                                                                                                                                                                                                                                                                                                                                                                                                                                                                                                                                                                                                                                                                                                                                                                                                                                                                                                                                                                                                                                                                                                                                                                                                                                                                                                                                                                                                                                                                                                                                |         |  |  |  |  |  |  |  |      |  |   |     |     |     |     |     |     |   |       |   |   |   |   |   |   |   |  |    |   |   |   |   |   |   |   |  |   |   |   |   |   |   |   |   |  |   |   |   |   |   |   |   |   |  |   |   |   |   |   |   |   |   |  |   |   |   |   |   |   |   |   |  |   |   |   |   |   |   |   |   |  |   |   |   |   |   |   |   |   |  |   |   |   |   |   |   |   |   |  |   |   |   |   |   |   |   |   |  |   |   |   |   |   |   |   |   |  |   |   |   |   |   |   |   |   |  |   |   |   |   |   |   |   |   |   |       |   |   |   |   |   |   |   |  |     |   |   |   |   |   |   |   |  |    |   |   |   |   |   |   |   |  |    |   |   |   |   |   |   |   |  |    |   |   |   |   |   |   |   |  |    |   |   |   |   |   |   |   |  |    |   |   |   |   |   |   |   |  |   |   |   |   |   |   |   |   |  |   |   |   |   |   |   |   |   |  |   |   |   |   |   |   |   |   |  |   |   |   |   |   |   |   |   |  |   |   |   |   |   |   |   |   |  |   |   |   |   |   |   |   |   |  |   |   |   |   |   |   |   |   |  |   |   |   |   |   |   |   |   |  |   |   |   |   |   |   |   |   |  |   |   |   |   |   |   |   |   |  |   |   |   |   |   |   |   |   |  |   |   |   |   |   |   |   |   |   |     |   |   |   |   |   |   |   |  |   |   |   |   |   |   |   |   |                                                                                                                                                                                                                                                                                                                                                                                                                                                                                                                                                                                                                                                                                                                                                                                                                                                                                                                                                                                                                                                                                                                                                                                                                                                                                                                                                                                                                                                                                                                                                                                                                                                                                                                                                                                                                                                                                                                                                                                                                                                                                                                                                                                                                                                                                                                                                                                                                                                                                                                                                                                                                                                                                                                                                                                                                                                                                                                                                                                                                                                                                                                                                                                                                                                                                                                                                                                                                                                                                                                                                                                                                                                                                                                                                                  |         |  |  |  |  |  |  |  |      |  |   |     |     |     |     |     |     |       |       |   |   |   |   |   |   |   |  |     |   |   |   |   |   |   |   |  |     |   |   |   |   |   |   |   |  |     |   |   |   |   |   |   |   |  |    |   |   |   |   |   |   |   |  |    |   |   |   |   |   |   |   |  |    |   |   |   |   |   |   |   |  |    |   |   |   |   |   |   |   |  |    |   |   |   |   |   |   |   |  |    |   |   |   |   |   |   |   |  |   |   |   |   |   |   |   |   |  |   |   |   |   |   |   |   |   |  |   |   |   |   |   |   |   |   |  |   |   |   |   |   |   |   |   |  |   |   |   |   |   |   |   |   |  |   |   |   |   |   |   |   |   |  |   |   |   |   |   |   |   |   |  |   |   |   |   |   |   |   |   |  |   |   |   |   |   |   |   |   |  |   |   |   |   |   |   |   |   |  |   |   |   |   |   |   |   |   |  |   |   |   |   |   |   |   |   |  |   |   |   |   |   |   |   |   |  |   |   |   |   |   |   |   |   |  |   |   |   |   |   |   |   |   |  |   |   |   |   |   |   |   |   |  |   |   |   |   |   |   |   |   |  |   |   |   |   |   |   |   |   |  |   |   |   |   |   |   |   |   |  |   |   |   |   |   |   |   |   |  |   |   |   |   |   |   |   |   |  |   |   |   |   |   |   |   |   |  |   |   |   |   |   |   |   |   |  |   |   |   |   |   |   |   |   |  |   |   |   |   |   |   |   |   |
|         | 1                                                                                                                                                                                                                                                                                                                                                                                                                                                                                                                                                                                                                                                                                                                                                                                                                                                                                                                                                                                                                                                                                                                                                                                                                                                                                                                                                                                                                                                                                                        | G            | Y   | A   | I   | Q   | D   | T   |    |      |     |     |     |     |     |     |     |     |   |       |   |   |   |   |   |   |   |   |     |   |   |                                                                                                                                                                                                                                                                                                                                                                                                                                                                                                                                                                                                                                                                                |         |   |   |   |  |   |    |     |     |     |     |   |   |   |   |    |   |   |   |   |    |   |   |   |   |    |   |   |   |   |   |   |   |   |   |   |   |   |   |   |   |   |   |   |   |   |   |   |   |   |   |   |   |   |   |   |   |   |  |   |   |   |   |   |   |   |   |   |   |   |   |   |   |   |   |   |  |   |   |   |   |   |   |   |   |  |   |   |   |   |   |   |   |   |  |   |   |   |   |   |   |   |   |                                                                                                                                                                                                                                                                                                                                                                                                                                                                                                                                                                                                                                                                                                                                                                                                                                                                                                                                                                                                                                                                                                                                                                                                                                                                                                                                                                                                                                                                                                                                                                                                                                                                                                                                                                                                                                                                                                                                                                                                                                                                                                                                                                                                                                                                                                                                                                                                                                                                                                                                                                                                                                                                                                                                                                                                                                                                                                                                                                                                                                                                                                                                                                                                                                                                                                                                                                                                                                                                                                                                                                                                                                                                |         |  |  |  |  |  |  |  |      |  |   |     |     |     |     |     |     |   |       |   |   |   |   |   |   |   |  |    |   |   |   |   |   |   |   |  |   |   |   |   |   |   |   |   |  |   |   |   |   |   |   |   |   |  |   |   |   |   |   |   |   |   |  |   |   |   |   |   |   |   |   |  |   |   |   |   |   |   |   |   |  |   |   |   |   |   |   |   |   |  |   |   |   |   |   |   |   |   |  |   |   |   |   |   |   |   |   |  |   |   |   |   |   |   |   |   |  |   |   |   |   |   |   |   |   |  |   |   |   |   |   |   |   |   |   |       |   |   |   |   |   |   |   |  |     |   |   |   |   |   |   |   |  |    |   |   |   |   |   |   |   |  |    |   |   |   |   |   |   |   |  |    |   |   |   |   |   |   |   |  |    |   |   |   |   |   |   |   |  |    |   |   |   |   |   |   |   |  |   |   |   |   |   |   |   |   |  |   |   |   |   |   |   |   |   |  |   |   |   |   |   |   |   |   |  |   |   |   |   |   |   |   |   |  |   |   |   |   |   |   |   |   |  |   |   |   |   |   |   |   |   |  |   |   |   |   |   |   |   |   |  |   |   |   |   |   |   |   |   |  |   |   |   |   |   |   |   |   |  |   |   |   |   |   |   |   |   |  |   |   |   |   |   |   |   |   |  |   |   |   |   |   |   |   |   |   |     |   |   |   |   |   |   |   |  |   |   |   |   |   |   |   |   |                                                                                                                                                                                                                                                                                                                                                                                                                                                                                                                                                                                                                                                                                                                                                                                                                                                                                                                                                                                                                                                                                                                                                                                                                                                                                                                                                                                                                                                                                                                                                                                                                                                                                                                                                                                                                                                                                                                                                                                                                                                                                                                                                                                                                                                                                                                                                                                                                                                                                                                                                                                                                                                                                                                                                                                                                                                                                                                                                                                                                                                                                                                                                                                                                                                                                                                                                                                                                                                                                                                                                                                                                                                                                                                                                                  |         |  |  |  |  |  |  |  |      |  |   |     |     |     |     |     |     |       |       |   |   |   |   |   |   |   |  |     |   |   |   |   |   |   |   |  |     |   |   |   |   |   |   |   |  |     |   |   |   |   |   |   |   |  |    |   |   |   |   |   |   |   |  |    |   |   |   |   |   |   |   |  |    |   |   |   |   |   |   |   |  |    |   |   |   |   |   |   |   |  |    |   |   |   |   |   |   |   |  |    |   |   |   |   |   |   |   |  |   |   |   |   |   |   |   |   |  |   |   |   |   |   |   |   |   |  |   |   |   |   |   |   |   |   |  |   |   |   |   |   |   |   |   |  |   |   |   |   |   |   |   |   |  |   |   |   |   |   |   |   |   |  |   |   |   |   |   |   |   |   |  |   |   |   |   |   |   |   |   |  |   |   |   |   |   |   |   |   |  |   |   |   |   |   |   |   |   |  |   |   |   |   |   |   |   |   |  |   |   |   |   |   |   |   |   |  |   |   |   |   |   |   |   |   |  |   |   |   |   |   |   |   |   |  |   |   |   |   |   |   |   |   |  |   |   |   |   |   |   |   |   |  |   |   |   |   |   |   |   |   |  |   |   |   |   |   |   |   |   |  |   |   |   |   |   |   |   |   |  |   |   |   |   |   |   |   |   |  |   |   |   |   |   |   |   |   |  |   |   |   |   |   |   |   |   |  |   |   |   |   |   |   |   |   |  |   |   |   |   |   |   |   |   |  |   |   |   |   |   |   |   |   |
|         | 1                                                                                                                                                                                                                                                                                                                                                                                                                                                                                                                                                                                                                                                                                                                                                                                                                                                                                                                                                                                                                                                                                                                                                                                                                                                                                                                                                                                                                                                                                                        | A            | Y   | A   | I   | R   | D   | T   |    |      |     |     |     |     |     |     |     |     |   |       |   |   |   |   |   |   |   |   |     |   |   |                                                                                                                                                                                                                                                                                                                                                                                                                                                                                                                                                                                                                                                                                |         |   |   |   |  |   |    |     |     |     |     |   |   |   |   |    |   |   |   |   |    |   |   |   |   |    |   |   |   |   |   |   |   |   |   |   |   |   |   |   |   |   |   |   |   |   |   |   |   |   |   |   |   |   |   |   |   |   |  |   |   |   |   |   |   |   |   |   |   |   |   |   |   |   |   |   |  |   |   |   |   |   |   |   |   |  |   |   |   |   |   |   |   |   |  |   |   |   |   |   |   |   |   |                                                                                                                                                                                                                                                                                                                                                                                                                                                                                                                                                                                                                                                                                                                                                                                                                                                                                                                                                                                                                                                                                                                                                                                                                                                                                                                                                                                                                                                                                                                                                                                                                                                                                                                                                                                                                                                                                                                                                                                                                                                                                                                                                                                                                                                                                                                                                                                                                                                                                                                                                                                                                                                                                                                                                                                                                                                                                                                                                                                                                                                                                                                                                                                                                                                                                                                                                                                                                                                                                                                                                                                                                                                                |         |  |  |  |  |  |  |  |      |  |   |     |     |     |     |     |     |   |       |   |   |   |   |   |   |   |  |    |   |   |   |   |   |   |   |  |   |   |   |   |   |   |   |   |  |   |   |   |   |   |   |   |   |  |   |   |   |   |   |   |   |   |  |   |   |   |   |   |   |   |   |  |   |   |   |   |   |   |   |   |  |   |   |   |   |   |   |   |   |  |   |   |   |   |   |   |   |   |  |   |   |   |   |   |   |   |   |  |   |   |   |   |   |   |   |   |  |   |   |   |   |   |   |   |   |  |   |   |   |   |   |   |   |   |   |       |   |   |   |   |   |   |   |  |     |   |   |   |   |   |   |   |  |    |   |   |   |   |   |   |   |  |    |   |   |   |   |   |   |   |  |    |   |   |   |   |   |   |   |  |    |   |   |   |   |   |   |   |  |    |   |   |   |   |   |   |   |  |   |   |   |   |   |   |   |   |  |   |   |   |   |   |   |   |   |  |   |   |   |   |   |   |   |   |  |   |   |   |   |   |   |   |   |  |   |   |   |   |   |   |   |   |  |   |   |   |   |   |   |   |   |  |   |   |   |   |   |   |   |   |  |   |   |   |   |   |   |   |   |  |   |   |   |   |   |   |   |   |  |   |   |   |   |   |   |   |   |  |   |   |   |   |   |   |   |   |  |   |   |   |   |   |   |   |   |   |     |   |   |   |   |   |   |   |  |   |   |   |   |   |   |   |   |                                                                                                                                                                                                                                                                                                                                                                                                                                                                                                                                                                                                                                                                                                                                                                                                                                                                                                                                                                                                                                                                                                                                                                                                                                                                                                                                                                                                                                                                                                                                                                                                                                                                                                                                                                                                                                                                                                                                                                                                                                                                                                                                                                                                                                                                                                                                                                                                                                                                                                                                                                                                                                                                                                                                                                                                                                                                                                                                                                                                                                                                                                                                                                                                                                                                                                                                                                                                                                                                                                                                                                                                                                                                                                                                                                  |         |  |  |  |  |  |  |  |      |  |   |     |     |     |     |     |     |       |       |   |   |   |   |   |   |   |  |     |   |   |   |   |   |   |   |  |     |   |   |   |   |   |   |   |  |     |   |   |   |   |   |   |   |  |    |   |   |   |   |   |   |   |  |    |   |   |   |   |   |   |   |  |    |   |   |   |   |   |   |   |  |    |   |   |   |   |   |   |   |  |    |   |   |   |   |   |   |   |  |    |   |   |   |   |   |   |   |  |   |   |   |   |   |   |   |   |  |   |   |   |   |   |   |   |   |  |   |   |   |   |   |   |   |   |  |   |   |   |   |   |   |   |   |  |   |   |   |   |   |   |   |   |  |   |   |   |   |   |   |   |   |  |   |   |   |   |   |   |   |   |  |   |   |   |   |   |   |   |   |  |   |   |   |   |   |   |   |   |  |   |   |   |   |   |   |   |   |  |   |   |   |   |   |   |   |   |  |   |   |   |   |   |   |   |   |  |   |   |   |   |   |   |   |   |  |   |   |   |   |   |   |   |   |  |   |   |   |   |   |   |   |   |  |   |   |   |   |   |   |   |   |  |   |   |   |   |   |   |   |   |  |   |   |   |   |   |   |   |   |  |   |   |   |   |   |   |   |   |  |   |   |   |   |   |   |   |   |  |   |   |   |   |   |   |   |   |  |   |   |   |   |   |   |   |   |  |   |   |   |   |   |   |   |   |  |   |   |   |   |   |   |   |   |  |   |   |   |   |   |   |   |   |
| a       | 1                                                                                                                                                                                                                                                                                                                                                                                                                                                                                                                                                                                                                                                                                                                                                                                                                                                                                                                                                                                                                                                                                                                                                                                                                                                                                                                                                                                                                                                                                                        | G            | F   | A   | I   | Q   | N   | T   |    |      |     |     |     |     |     |     |     |     |   |       |   |   |   |   |   |   |   |   |     |   |   |                                                                                                                                                                                                                                                                                                                                                                                                                                                                                                                                                                                                                                                                                |         |   |   |   |  |   |    |     |     |     |     |   |   |   |   |    |   |   |   |   |    |   |   |   |   |    |   |   |   |   |   |   |   |   |   |   |   |   |   |   |   |   |   |   |   |   |   |   |   |   |   |   |   |   |   |   |   |   |  |   |   |   |   |   |   |   |   |   |   |   |   |   |   |   |   |   |  |   |   |   |   |   |   |   |   |  |   |   |   |   |   |   |   |   |  |   |   |   |   |   |   |   |   |                                                                                                                                                                                                                                                                                                                                                                                                                                                                                                                                                                                                                                                                                                                                                                                                                                                                                                                                                                                                                                                                                                                                                                                                                                                                                                                                                                                                                                                                                                                                                                                                                                                                                                                                                                                                                                                                                                                                                                                                                                                                                                                                                                                                                                                                                                                                                                                                                                                                                                                                                                                                                                                                                                                                                                                                                                                                                                                                                                                                                                                                                                                                                                                                                                                                                                                                                                                                                                                                                                                                                                                                                                                                |         |  |  |  |  |  |  |  |      |  |   |     |     |     |     |     |     |   |       |   |   |   |   |   |   |   |  |    |   |   |   |   |   |   |   |  |   |   |   |   |   |   |   |   |  |   |   |   |   |   |   |   |   |  |   |   |   |   |   |   |   |   |  |   |   |   |   |   |   |   |   |  |   |   |   |   |   |   |   |   |  |   |   |   |   |   |   |   |   |  |   |   |   |   |   |   |   |   |  |   |   |   |   |   |   |   |   |  |   |   |   |   |   |   |   |   |  |   |   |   |   |   |   |   |   |  |   |   |   |   |   |   |   |   |   |       |   |   |   |   |   |   |   |  |     |   |   |   |   |   |   |   |  |    |   |   |   |   |   |   |   |  |    |   |   |   |   |   |   |   |  |    |   |   |   |   |   |   |   |  |    |   |   |   |   |   |   |   |  |    |   |   |   |   |   |   |   |  |   |   |   |   |   |   |   |   |  |   |   |   |   |   |   |   |   |  |   |   |   |   |   |   |   |   |  |   |   |   |   |   |   |   |   |  |   |   |   |   |   |   |   |   |  |   |   |   |   |   |   |   |   |  |   |   |   |   |   |   |   |   |  |   |   |   |   |   |   |   |   |  |   |   |   |   |   |   |   |   |  |   |   |   |   |   |   |   |   |  |   |   |   |   |   |   |   |   |  |   |   |   |   |   |   |   |   |   |     |   |   |   |   |   |   |   |  |   |   |   |   |   |   |   |   |                                                                                                                                                                                                                                                                                                                                                                                                                                                                                                                                                                                                                                                                                                                                                                                                                                                                                                                                                                                                                                                                                                                                                                                                                                                                                                                                                                                                                                                                                                                                                                                                                                                                                                                                                                                                                                                                                                                                                                                                                                                                                                                                                                                                                                                                                                                                                                                                                                                                                                                                                                                                                                                                                                                                                                                                                                                                                                                                                                                                                                                                                                                                                                                                                                                                                                                                                                                                                                                                                                                                                                                                                                                                                                                                                                  |         |  |  |  |  |  |  |  |      |  |   |     |     |     |     |     |     |       |       |   |   |   |   |   |   |   |  |     |   |   |   |   |   |   |   |  |     |   |   |   |   |   |   |   |  |     |   |   |   |   |   |   |   |  |    |   |   |   |   |   |   |   |  |    |   |   |   |   |   |   |   |  |    |   |   |   |   |   |   |   |  |    |   |   |   |   |   |   |   |  |    |   |   |   |   |   |   |   |  |    |   |   |   |   |   |   |   |  |   |   |   |   |   |   |   |   |  |   |   |   |   |   |   |   |   |  |   |   |   |   |   |   |   |   |  |   |   |   |   |   |   |   |   |  |   |   |   |   |   |   |   |   |  |   |   |   |   |   |   |   |   |  |   |   |   |   |   |   |   |   |  |   |   |   |   |   |   |   |   |  |   |   |   |   |   |   |   |   |  |   |   |   |   |   |   |   |   |  |   |   |   |   |   |   |   |   |  |   |   |   |   |   |   |   |   |  |   |   |   |   |   |   |   |   |  |   |   |   |   |   |   |   |   |  |   |   |   |   |   |   |   |   |  |   |   |   |   |   |   |   |   |  |   |   |   |   |   |   |   |   |  |   |   |   |   |   |   |   |   |  |   |   |   |   |   |   |   |   |  |   |   |   |   |   |   |   |   |  |   |   |   |   |   |   |   |   |  |   |   |   |   |   |   |   |   |  |   |   |   |   |   |   |   |   |  |   |   |   |   |   |   |   |   |  |   |   |   |   |   |   |   |   |
|         | 1                                                                                                                                                                                                                                                                                                                                                                                                                                                                                                                                                                                                                                                                                                                                                                                                                                                                                                                                                                                                                                                                                                                                                                                                                                                                                                                                                                                                                                                                                                        | G            | Y   | A   | I   | R   | N   | A   |    |      |     |     |     |     |     |     |     |     |   |       |   |   |   |   |   |   |   |   |     |   |   |                                                                                                                                                                                                                                                                                                                                                                                                                                                                                                                                                                                                                                                                                |         |   |   |   |  |   |    |     |     |     |     |   |   |   |   |    |   |   |   |   |    |   |   |   |   |    |   |   |   |   |   |   |   |   |   |   |   |   |   |   |   |   |   |   |   |   |   |   |   |   |   |   |   |   |   |   |   |   |  |   |   |   |   |   |   |   |   |   |   |   |   |   |   |   |   |   |  |   |   |   |   |   |   |   |   |  |   |   |   |   |   |   |   |   |  |   |   |   |   |   |   |   |   |                                                                                                                                                                                                                                                                                                                                                                                                                                                                                                                                                                                                                                                                                                                                                                                                                                                                                                                                                                                                                                                                                                                                                                                                                                                                                                                                                                                                                                                                                                                                                                                                                                                                                                                                                                                                                                                                                                                                                                                                                                                                                                                                                                                                                                                                                                                                                                                                                                                                                                                                                                                                                                                                                                                                                                                                                                                                                                                                                                                                                                                                                                                                                                                                                                                                                                                                                                                                                                                                                                                                                                                                                                                                |         |  |  |  |  |  |  |  |      |  |   |     |     |     |     |     |     |   |       |   |   |   |   |   |   |   |  |    |   |   |   |   |   |   |   |  |   |   |   |   |   |   |   |   |  |   |   |   |   |   |   |   |   |  |   |   |   |   |   |   |   |   |  |   |   |   |   |   |   |   |   |  |   |   |   |   |   |   |   |   |  |   |   |   |   |   |   |   |   |  |   |   |   |   |   |   |   |   |  |   |   |   |   |   |   |   |   |  |   |   |   |   |   |   |   |   |  |   |   |   |   |   |   |   |   |  |   |   |   |   |   |   |   |   |   |       |   |   |   |   |   |   |   |  |     |   |   |   |   |   |   |   |  |    |   |   |   |   |   |   |   |  |    |   |   |   |   |   |   |   |  |    |   |   |   |   |   |   |   |  |    |   |   |   |   |   |   |   |  |    |   |   |   |   |   |   |   |  |   |   |   |   |   |   |   |   |  |   |   |   |   |   |   |   |   |  |   |   |   |   |   |   |   |   |  |   |   |   |   |   |   |   |   |  |   |   |   |   |   |   |   |   |  |   |   |   |   |   |   |   |   |  |   |   |   |   |   |   |   |   |  |   |   |   |   |   |   |   |   |  |   |   |   |   |   |   |   |   |  |   |   |   |   |   |   |   |   |  |   |   |   |   |   |   |   |   |  |   |   |   |   |   |   |   |   |   |     |   |   |   |   |   |   |   |  |   |   |   |   |   |   |   |   |                                                                                                                                                                                                                                                                                                                                                                                                                                                                                                                                                                                                                                                                                                                                                                                                                                                                                                                                                                                                                                                                                                                                                                                                                                                                                                                                                                                                                                                                                                                                                                                                                                                                                                                                                                                                                                                                                                                                                                                                                                                                                                                                                                                                                                                                                                                                                                                                                                                                                                                                                                                                                                                                                                                                                                                                                                                                                                                                                                                                                                                                                                                                                                                                                                                                                                                                                                                                                                                                                                                                                                                                                                                                                                                                                                  |         |  |  |  |  |  |  |  |      |  |   |     |     |     |     |     |     |       |       |   |   |   |   |   |   |   |  |     |   |   |   |   |   |   |   |  |     |   |   |   |   |   |   |   |  |     |   |   |   |   |   |   |   |  |    |   |   |   |   |   |   |   |  |    |   |   |   |   |   |   |   |  |    |   |   |   |   |   |   |   |  |    |   |   |   |   |   |   |   |  |    |   |   |   |   |   |   |   |  |    |   |   |   |   |   |   |   |  |   |   |   |   |   |   |   |   |  |   |   |   |   |   |   |   |   |  |   |   |   |   |   |   |   |   |  |   |   |   |   |   |   |   |   |  |   |   |   |   |   |   |   |   |  |   |   |   |   |   |   |   |   |  |   |   |   |   |   |   |   |   |  |   |   |   |   |   |   |   |   |  |   |   |   |   |   |   |   |   |  |   |   |   |   |   |   |   |   |  |   |   |   |   |   |   |   |   |  |   |   |   |   |   |   |   |   |  |   |   |   |   |   |   |   |   |  |   |   |   |   |   |   |   |   |  |   |   |   |   |   |   |   |   |  |   |   |   |   |   |   |   |   |  |   |   |   |   |   |   |   |   |  |   |   |   |   |   |   |   |   |  |   |   |   |   |   |   |   |   |  |   |   |   |   |   |   |   |   |  |   |   |   |   |   |   |   |   |  |   |   |   |   |   |   |   |   |  |   |   |   |   |   |   |   |   |  |   |   |   |   |   |   |   |   |  |   |   |   |   |   |   |   |   |
|         | 1                                                                                                                                                                                                                                                                                                                                                                                                                                                                                                                                                                                                                                                                                                                                                                                                                                                                                                                                                                                                                                                                                                                                                                                                                                                                                                                                                                                                                                                                                                        | A            | Y   | A   | I   | R   | N   | T   |    |      |     |     |     |     |     |     |     |     |   |       |   |   |   |   |   |   |   |   |     |   |   |                                                                                                                                                                                                                                                                                                                                                                                                                                                                                                                                                                                                                                                                                |         |   |   |   |  |   |    |     |     |     |     |   |   |   |   |    |   |   |   |   |    |   |   |   |   |    |   |   |   |   |   |   |   |   |   |   |   |   |   |   |   |   |   |   |   |   |   |   |   |   |   |   |   |   |   |   |   |   |  |   |   |   |   |   |   |   |   |   |   |   |   |   |   |   |   |   |  |   |   |   |   |   |   |   |   |  |   |   |   |   |   |   |   |   |  |   |   |   |   |   |   |   |   |                                                                                                                                                                                                                                                                                                                                                                                                                                                                                                                                                                                                                                                                                                                                                                                                                                                                                                                                                                                                                                                                                                                                                                                                                                                                                                                                                                                                                                                                                                                                                                                                                                                                                                                                                                                                                                                                                                                                                                                                                                                                                                                                                                                                                                                                                                                                                                                                                                                                                                                                                                                                                                                                                                                                                                                                                                                                                                                                                                                                                                                                                                                                                                                                                                                                                                                                                                                                                                                                                                                                                                                                                                                                |         |  |  |  |  |  |  |  |      |  |   |     |     |     |     |     |     |   |       |   |   |   |   |   |   |   |  |    |   |   |   |   |   |   |   |  |   |   |   |   |   |   |   |   |  |   |   |   |   |   |   |   |   |  |   |   |   |   |   |   |   |   |  |   |   |   |   |   |   |   |   |  |   |   |   |   |   |   |   |   |  |   |   |   |   |   |   |   |   |  |   |   |   |   |   |   |   |   |  |   |   |   |   |   |   |   |   |  |   |   |   |   |   |   |   |   |  |   |   |   |   |   |   |   |   |  |   |   |   |   |   |   |   |   |   |       |   |   |   |   |   |   |   |  |     |   |   |   |   |   |   |   |  |    |   |   |   |   |   |   |   |  |    |   |   |   |   |   |   |   |  |    |   |   |   |   |   |   |   |  |    |   |   |   |   |   |   |   |  |    |   |   |   |   |   |   |   |  |   |   |   |   |   |   |   |   |  |   |   |   |   |   |   |   |   |  |   |   |   |   |   |   |   |   |  |   |   |   |   |   |   |   |   |  |   |   |   |   |   |   |   |   |  |   |   |   |   |   |   |   |   |  |   |   |   |   |   |   |   |   |  |   |   |   |   |   |   |   |   |  |   |   |   |   |   |   |   |   |  |   |   |   |   |   |   |   |   |  |   |   |   |   |   |   |   |   |  |   |   |   |   |   |   |   |   |   |     |   |   |   |   |   |   |   |  |   |   |   |   |   |   |   |   |                                                                                                                                                                                                                                                                                                                                                                                                                                                                                                                                                                                                                                                                                                                                                                                                                                                                                                                                                                                                                                                                                                                                                                                                                                                                                                                                                                                                                                                                                                                                                                                                                                                                                                                                                                                                                                                                                                                                                                                                                                                                                                                                                                                                                                                                                                                                                                                                                                                                                                                                                                                                                                                                                                                                                                                                                                                                                                                                                                                                                                                                                                                                                                                                                                                                                                                                                                                                                                                                                                                                                                                                                                                                                                                                                                  |         |  |  |  |  |  |  |  |      |  |   |     |     |     |     |     |     |       |       |   |   |   |   |   |   |   |  |     |   |   |   |   |   |   |   |  |     |   |   |   |   |   |   |   |  |     |   |   |   |   |   |   |   |  |    |   |   |   |   |   |   |   |  |    |   |   |   |   |   |   |   |  |    |   |   |   |   |   |   |   |  |    |   |   |   |   |   |   |   |  |    |   |   |   |   |   |   |   |  |    |   |   |   |   |   |   |   |  |   |   |   |   |   |   |   |   |  |   |   |   |   |   |   |   |   |  |   |   |   |   |   |   |   |   |  |   |   |   |   |   |   |   |   |  |   |   |   |   |   |   |   |   |  |   |   |   |   |   |   |   |   |  |   |   |   |   |   |   |   |   |  |   |   |   |   |   |   |   |   |  |   |   |   |   |   |   |   |   |  |   |   |   |   |   |   |   |   |  |   |   |   |   |   |   |   |   |  |   |   |   |   |   |   |   |   |  |   |   |   |   |   |   |   |   |  |   |   |   |   |   |   |   |   |  |   |   |   |   |   |   |   |   |  |   |   |   |   |   |   |   |   |  |   |   |   |   |   |   |   |   |  |   |   |   |   |   |   |   |   |  |   |   |   |   |   |   |   |   |  |   |   |   |   |   |   |   |   |  |   |   |   |   |   |   |   |   |  |   |   |   |   |   |   |   |   |  |   |   |   |   |   |   |   |   |  |   |   |   |   |   |   |   |   |  |   |   |   |   |   |   |   |   |
|         | 1                                                                                                                                                                                                                                                                                                                                                                                                                                                                                                                                                                                                                                                                                                                                                                                                                                                                                                                                                                                                                                                                                                                                                                                                                                                                                                                                                                                                                                                                                                        | G            | Y   | A   | I   | Q   | N   | T   |    |      |     |     |     |     |     |     |     |     |   |       |   |   |   |   |   |   |   |   |     |   |   |                                                                                                                                                                                                                                                                                                                                                                                                                                                                                                                                                                                                                                                                                |         |   |   |   |  |   |    |     |     |     |     |   |   |   |   |    |   |   |   |   |    |   |   |   |   |    |   |   |   |   |   |   |   |   |   |   |   |   |   |   |   |   |   |   |   |   |   |   |   |   |   |   |   |   |   |   |   |   |  |   |   |   |   |   |   |   |   |   |   |   |   |   |   |   |   |   |  |   |   |   |   |   |   |   |   |  |   |   |   |   |   |   |   |   |  |   |   |   |   |   |   |   |   |                                                                                                                                                                                                                                                                                                                                                                                                                                                                                                                                                                                                                                                                                                                                                                                                                                                                                                                                                                                                                                                                                                                                                                                                                                                                                                                                                                                                                                                                                                                                                                                                                                                                                                                                                                                                                                                                                                                                                                                                                                                                                                                                                                                                                                                                                                                                                                                                                                                                                                                                                                                                                                                                                                                                                                                                                                                                                                                                                                                                                                                                                                                                                                                                                                                                                                                                                                                                                                                                                                                                                                                                                                                                |         |  |  |  |  |  |  |  |      |  |   |     |     |     |     |     |     |   |       |   |   |   |   |   |   |   |  |    |   |   |   |   |   |   |   |  |   |   |   |   |   |   |   |   |  |   |   |   |   |   |   |   |   |  |   |   |   |   |   |   |   |   |  |   |   |   |   |   |   |   |   |  |   |   |   |   |   |   |   |   |  |   |   |   |   |   |   |   |   |  |   |   |   |   |   |   |   |   |  |   |   |   |   |   |   |   |   |  |   |   |   |   |   |   |   |   |  |   |   |   |   |   |   |   |   |  |   |   |   |   |   |   |   |   |   |       |   |   |   |   |   |   |   |  |     |   |   |   |   |   |   |   |  |    |   |   |   |   |   |   |   |  |    |   |   |   |   |   |   |   |  |    |   |   |   |   |   |   |   |  |    |   |   |   |   |   |   |   |  |    |   |   |   |   |   |   |   |  |   |   |   |   |   |   |   |   |  |   |   |   |   |   |   |   |   |  |   |   |   |   |   |   |   |   |  |   |   |   |   |   |   |   |   |  |   |   |   |   |   |   |   |   |  |   |   |   |   |   |   |   |   |  |   |   |   |   |   |   |   |   |  |   |   |   |   |   |   |   |   |  |   |   |   |   |   |   |   |   |  |   |   |   |   |   |   |   |   |  |   |   |   |   |   |   |   |   |  |   |   |   |   |   |   |   |   |   |     |   |   |   |   |   |   |   |  |   |   |   |   |   |   |   |   |                                                                                                                                                                                                                                                                                                                                                                                                                                                                                                                                                                                                                                                                                                                                                                                                                                                                                                                                                                                                                                                                                                                                                                                                                                                                                                                                                                                                                                                                                                                                                                                                                                                                                                                                                                                                                                                                                                                                                                                                                                                                                                                                                                                                                                                                                                                                                                                                                                                                                                                                                                                                                                                                                                                                                                                                                                                                                                                                                                                                                                                                                                                                                                                                                                                                                                                                                                                                                                                                                                                                                                                                                                                                                                                                                                  |         |  |  |  |  |  |  |  |      |  |   |     |     |     |     |     |     |       |       |   |   |   |   |   |   |   |  |     |   |   |   |   |   |   |   |  |     |   |   |   |   |   |   |   |  |     |   |   |   |   |   |   |   |  |    |   |   |   |   |   |   |   |  |    |   |   |   |   |   |   |   |  |    |   |   |   |   |   |   |   |  |    |   |   |   |   |   |   |   |  |    |   |   |   |   |   |   |   |  |    |   |   |   |   |   |   |   |  |   |   |   |   |   |   |   |   |  |   |   |   |   |   |   |   |   |  |   |   |   |   |   |   |   |   |  |   |   |   |   |   |   |   |   |  |   |   |   |   |   |   |   |   |  |   |   |   |   |   |   |   |   |  |   |   |   |   |   |   |   |   |  |   |   |   |   |   |   |   |   |  |   |   |   |   |   |   |   |   |  |   |   |   |   |   |   |   |   |  |   |   |   |   |   |   |   |   |  |   |   |   |   |   |   |   |   |  |   |   |   |   |   |   |   |   |  |   |   |   |   |   |   |   |   |  |   |   |   |   |   |   |   |   |  |   |   |   |   |   |   |   |   |  |   |   |   |   |   |   |   |   |  |   |   |   |   |   |   |   |   |  |   |   |   |   |   |   |   |   |  |   |   |   |   |   |   |   |   |  |   |   |   |   |   |   |   |   |  |   |   |   |   |   |   |   |   |  |   |   |   |   |   |   |   |   |  |   |   |   |   |   |   |   |   |  |   |   |   |   |   |   |   |   |
| Residue |                                                                                                                                                                                                                                                                                                                                                                                                                                                                                                                                                                                                                                                                                                                                                                                                                                                                                                                                                                                                                                                                                                                                                                                                                                                                                                                                                                                                                                                                                                          |              |     |     |     |     |     |     |    |      |     |     |     |     |     |     |     |     |   |       |   |   |   |   |   |   |   |   |     |   |   |                                                                                                                                                                                                                                                                                                                                                                                                                                                                                                                                                                                                                                                                                |         |   |   |   |  |   |    |     |     |     |     |   |   |   |   |    |   |   |   |   |    |   |   |   |   |    |   |   |   |   |   |   |   |   |   |   |   |   |   |   |   |   |   |   |   |   |   |   |   |   |   |   |   |   |   |   |   |   |  |   |   |   |   |   |   |   |   |   |   |   |   |   |   |   |   |   |  |   |   |   |   |   |   |   |   |  |   |   |   |   |   |   |   |   |  |   |   |   |   |   |   |   |   |                                                                                                                                                                                                                                                                                                                                                                                                                                                                                                                                                                                                                                                                                                                                                                                                                                                                                                                                                                                                                                                                                                                                                                                                                                                                                                                                                                                                                                                                                                                                                                                                                                                                                                                                                                                                                                                                                                                                                                                                                                                                                                                                                                                                                                                                                                                                                                                                                                                                                                                                                                                                                                                                                                                                                                                                                                                                                                                                                                                                                                                                                                                                                                                                                                                                                                                                                                                                                                                                                                                                                                                                                                                                |         |  |  |  |  |  |  |  |      |  |   |     |     |     |     |     |     |   |       |   |   |   |   |   |   |   |  |    |   |   |   |   |   |   |   |  |   |   |   |   |   |   |   |   |  |   |   |   |   |   |   |   |   |  |   |   |   |   |   |   |   |   |  |   |   |   |   |   |   |   |   |  |   |   |   |   |   |   |   |   |  |   |   |   |   |   |   |   |   |  |   |   |   |   |   |   |   |   |  |   |   |   |   |   |   |   |   |  |   |   |   |   |   |   |   |   |  |   |   |   |   |   |   |   |   |  |   |   |   |   |   |   |   |   |   |       |   |   |   |   |   |   |   |  |     |   |   |   |   |   |   |   |  |    |   |   |   |   |   |   |   |  |    |   |   |   |   |   |   |   |  |    |   |   |   |   |   |   |   |  |    |   |   |   |   |   |   |   |  |    |   |   |   |   |   |   |   |  |   |   |   |   |   |   |   |   |  |   |   |   |   |   |   |   |   |  |   |   |   |   |   |   |   |   |  |   |   |   |   |   |   |   |   |  |   |   |   |   |   |   |   |   |  |   |   |   |   |   |   |   |   |  |   |   |   |   |   |   |   |   |  |   |   |   |   |   |   |   |   |  |   |   |   |   |   |   |   |   |  |   |   |   |   |   |   |   |   |  |   |   |   |   |   |   |   |   |  |   |   |   |   |   |   |   |   |   |     |   |   |   |   |   |   |   |  |   |   |   |   |   |   |   |   |                                                                                                                                                                                                                                                                                                                                                                                                                                                                                                                                                                                                                                                                                                                                                                                                                                                                                                                                                                                                                                                                                                                                                                                                                                                                                                                                                                                                                                                                                                                                                                                                                                                                                                                                                                                                                                                                                                                                                                                                                                                                                                                                                                                                                                                                                                                                                                                                                                                                                                                                                                                                                                                                                                                                                                                                                                                                                                                                                                                                                                                                                                                                                                                                                                                                                                                                                                                                                                                                                                                                                                                                                                                                                                                                                                  |         |  |  |  |  |  |  |  |      |  |   |     |     |     |     |     |     |       |       |   |   |   |   |   |   |   |  |     |   |   |   |   |   |   |   |  |     |   |   |   |   |   |   |   |  |     |   |   |   |   |   |   |   |  |    |   |   |   |   |   |   |   |  |    |   |   |   |   |   |   |   |  |    |   |   |   |   |   |   |   |  |    |   |   |   |   |   |   |   |  |    |   |   |   |   |   |   |   |  |    |   |   |   |   |   |   |   |  |   |   |   |   |   |   |   |   |  |   |   |   |   |   |   |   |   |  |   |   |   |   |   |   |   |   |  |   |   |   |   |   |   |   |   |  |   |   |   |   |   |   |   |   |  |   |   |   |   |   |   |   |   |  |   |   |   |   |   |   |   |   |  |   |   |   |   |   |   |   |   |  |   |   |   |   |   |   |   |   |  |   |   |   |   |   |   |   |   |  |   |   |   |   |   |   |   |   |  |   |   |   |   |   |   |   |   |  |   |   |   |   |   |   |   |   |  |   |   |   |   |   |   |   |   |  |   |   |   |   |   |   |   |   |  |   |   |   |   |   |   |   |   |  |   |   |   |   |   |   |   |   |  |   |   |   |   |   |   |   |   |  |   |   |   |   |   |   |   |   |  |   |   |   |   |   |   |   |   |  |   |   |   |   |   |   |   |   |  |   |   |   |   |   |   |   |   |  |   |   |   |   |   |   |   |   |  |   |   |   |   |   |   |   |   |  |   |   |   |   |   |   |   |   |
| Type    |                                                                                                                                                                                                                                                                                                                                                                                                                                                                                                                                                                                                                                                                                                                                                                                                                                                                                                                                                                                                                                                                                                                                                                                                                                                                                                                                                                                                                                                                                                          | 5            | 267 | 297 | 324 | 370 | 426 | 440 |    |      |     |     |     |     |     |     |     |     |   |       |   |   |   |   |   |   |   |   |     |   |   |                                                                                                                                                                                                                                                                                                                                                                                                                                                                                                                                                                                                                                                                                |         |   |   |   |  |   |    |     |     |     |     |   |   |   |   |    |   |   |   |   |    |   |   |   |   |    |   |   |   |   |   |   |   |   |   |   |   |   |   |   |   |   |   |   |   |   |   |   |   |   |   |   |   |   |   |   |   |   |  |   |   |   |   |   |   |   |   |   |   |   |   |   |   |   |   |   |  |   |   |   |   |   |   |   |   |  |   |   |   |   |   |   |   |   |  |   |   |   |   |   |   |   |   |                                                                                                                                                                                                                                                                                                                                                                                                                                                                                                                                                                                                                                                                                                                                                                                                                                                                                                                                                                                                                                                                                                                                                                                                                                                                                                                                                                                                                                                                                                                                                                                                                                                                                                                                                                                                                                                                                                                                                                                                                                                                                                                                                                                                                                                                                                                                                                                                                                                                                                                                                                                                                                                                                                                                                                                                                                                                                                                                                                                                                                                                                                                                                                                                                                                                                                                                                                                                                                                                                                                                                                                                                                                                |         |  |  |  |  |  |  |  |      |  |   |     |     |     |     |     |     |   |       |   |   |   |   |   |   |   |  |    |   |   |   |   |   |   |   |  |   |   |   |   |   |   |   |   |  |   |   |   |   |   |   |   |   |  |   |   |   |   |   |   |   |   |  |   |   |   |   |   |   |   |   |  |   |   |   |   |   |   |   |   |  |   |   |   |   |   |   |   |   |  |   |   |   |   |   |   |   |   |  |   |   |   |   |   |   |   |   |  |   |   |   |   |   |   |   |   |  |   |   |   |   |   |   |   |   |  |   |   |   |   |   |   |   |   |   |       |   |   |   |   |   |   |   |  |     |   |   |   |   |   |   |   |  |    |   |   |   |   |   |   |   |  |    |   |   |   |   |   |   |   |  |    |   |   |   |   |   |   |   |  |    |   |   |   |   |   |   |   |  |    |   |   |   |   |   |   |   |  |   |   |   |   |   |   |   |   |  |   |   |   |   |   |   |   |   |  |   |   |   |   |   |   |   |   |  |   |   |   |   |   |   |   |   |  |   |   |   |   |   |   |   |   |  |   |   |   |   |   |   |   |   |  |   |   |   |   |   |   |   |   |  |   |   |   |   |   |   |   |   |  |   |   |   |   |   |   |   |   |  |   |   |   |   |   |   |   |   |  |   |   |   |   |   |   |   |   |  |   |   |   |   |   |   |   |   |   |     |   |   |   |   |   |   |   |  |   |   |   |   |   |   |   |   |                                                                                                                                                                                                                                                                                                                                                                                                                                                                                                                                                                                                                                                                                                                                                                                                                                                                                                                                                                                                                                                                                                                                                                                                                                                                                                                                                                                                                                                                                                                                                                                                                                                                                                                                                                                                                                                                                                                                                                                                                                                                                                                                                                                                                                                                                                                                                                                                                                                                                                                                                                                                                                                                                                                                                                                                                                                                                                                                                                                                                                                                                                                                                                                                                                                                                                                                                                                                                                                                                                                                                                                                                                                                                                                                                                  |         |  |  |  |  |  |  |  |      |  |   |     |     |     |     |     |     |       |       |   |   |   |   |   |   |   |  |     |   |   |   |   |   |   |   |  |     |   |   |   |   |   |   |   |  |     |   |   |   |   |   |   |   |  |    |   |   |   |   |   |   |   |  |    |   |   |   |   |   |   |   |  |    |   |   |   |   |   |   |   |  |    |   |   |   |   |   |   |   |  |    |   |   |   |   |   |   |   |  |    |   |   |   |   |   |   |   |  |   |   |   |   |   |   |   |   |  |   |   |   |   |   |   |   |   |  |   |   |   |   |   |   |   |   |  |   |   |   |   |   |   |   |   |  |   |   |   |   |   |   |   |   |  |   |   |   |   |   |   |   |   |  |   |   |   |   |   |   |   |   |  |   |   |   |   |   |   |   |   |  |   |   |   |   |   |   |   |   |  |   |   |   |   |   |   |   |   |  |   |   |   |   |   |   |   |   |  |   |   |   |   |   |   |   |   |  |   |   |   |   |   |   |   |   |  |   |   |   |   |   |   |   |   |  |   |   |   |   |   |   |   |   |  |   |   |   |   |   |   |   |   |  |   |   |   |   |   |   |   |   |  |   |   |   |   |   |   |   |   |  |   |   |   |   |   |   |   |   |  |   |   |   |   |   |   |   |   |  |   |   |   |   |   |   |   |   |  |   |   |   |   |   |   |   |   |  |   |   |   |   |   |   |   |   |  |   |   |   |   |   |   |   |   |  |   |   |   |   |   |   |   |   |
| c       | N 417                                                                                                                                                                                                                                                                                                                                                                                                                                                                                                                                                                                                                                                                                                                                                                                                                                                                                                                                                                                                                                                                                                                                                                                                                                                                                                                                                                                                                                                                                                    | A            | F   | A   | Y   | Q   | E   | T   |    |      |     |     |     |     |     |     |     |     |   |       |   |   |   |   |   |   |   |   |     |   |   |                                                                                                                                                                                                                                                                                                                                                                                                                                                                                                                                                                                                                                                                                |         |   |   |   |  |   |    |     |     |     |     |   |   |   |   |    |   |   |   |   |    |   |   |   |   |    |   |   |   |   |   |   |   |   |   |   |   |   |   |   |   |   |   |   |   |   |   |   |   |   |   |   |   |   |   |   |   |   |  |   |   |   |   |   |   |   |   |   |   |   |   |   |   |   |   |   |  |   |   |   |   |   |   |   |   |  |   |   |   |   |   |   |   |   |  |   |   |   |   |   |   |   |   |                                                                                                                                                                                                                                                                                                                                                                                                                                                                                                                                                                                                                                                                                                                                                                                                                                                                                                                                                                                                                                                                                                                                                                                                                                                                                                                                                                                                                                                                                                                                                                                                                                                                                                                                                                                                                                                                                                                                                                                                                                                                                                                                                                                                                                                                                                                                                                                                                                                                                                                                                                                                                                                                                                                                                                                                                                                                                                                                                                                                                                                                                                                                                                                                                                                                                                                                                                                                                                                                                                                                                                                                                                                                |         |  |  |  |  |  |  |  |      |  |   |     |     |     |     |     |     |   |       |   |   |   |   |   |   |   |  |    |   |   |   |   |   |   |   |  |   |   |   |   |   |   |   |   |  |   |   |   |   |   |   |   |   |  |   |   |   |   |   |   |   |   |  |   |   |   |   |   |   |   |   |  |   |   |   |   |   |   |   |   |  |   |   |   |   |   |   |   |   |  |   |   |   |   |   |   |   |   |  |   |   |   |   |   |   |   |   |  |   |   |   |   |   |   |   |   |  |   |   |   |   |   |   |   |   |  |   |   |   |   |   |   |   |   |   |       |   |   |   |   |   |   |   |  |     |   |   |   |   |   |   |   |  |    |   |   |   |   |   |   |   |  |    |   |   |   |   |   |   |   |  |    |   |   |   |   |   |   |   |  |    |   |   |   |   |   |   |   |  |    |   |   |   |   |   |   |   |  |   |   |   |   |   |   |   |   |  |   |   |   |   |   |   |   |   |  |   |   |   |   |   |   |   |   |  |   |   |   |   |   |   |   |   |  |   |   |   |   |   |   |   |   |  |   |   |   |   |   |   |   |   |  |   |   |   |   |   |   |   |   |  |   |   |   |   |   |   |   |   |  |   |   |   |   |   |   |   |   |  |   |   |   |   |   |   |   |   |  |   |   |   |   |   |   |   |   |  |   |   |   |   |   |   |   |   |   |     |   |   |   |   |   |   |   |  |   |   |   |   |   |   |   |   |                                                                                                                                                                                                                                                                                                                                                                                                                                                                                                                                                                                                                                                                                                                                                                                                                                                                                                                                                                                                                                                                                                                                                                                                                                                                                                                                                                                                                                                                                                                                                                                                                                                                                                                                                                                                                                                                                                                                                                                                                                                                                                                                                                                                                                                                                                                                                                                                                                                                                                                                                                                                                                                                                                                                                                                                                                                                                                                                                                                                                                                                                                                                                                                                                                                                                                                                                                                                                                                                                                                                                                                                                                                                                                                                                                  |         |  |  |  |  |  |  |  |      |  |   |     |     |     |     |     |     |       |       |   |   |   |   |   |   |   |  |     |   |   |   |   |   |   |   |  |     |   |   |   |   |   |   |   |  |     |   |   |   |   |   |   |   |  |    |   |   |   |   |   |   |   |  |    |   |   |   |   |   |   |   |  |    |   |   |   |   |   |   |   |  |    |   |   |   |   |   |   |   |  |    |   |   |   |   |   |   |   |  |    |   |   |   |   |   |   |   |  |   |   |   |   |   |   |   |   |  |   |   |   |   |   |   |   |   |  |   |   |   |   |   |   |   |   |  |   |   |   |   |   |   |   |   |  |   |   |   |   |   |   |   |   |  |   |   |   |   |   |   |   |   |  |   |   |   |   |   |   |   |   |  |   |   |   |   |   |   |   |   |  |   |   |   |   |   |   |   |   |  |   |   |   |   |   |   |   |   |  |   |   |   |   |   |   |   |   |  |   |   |   |   |   |   |   |   |  |   |   |   |   |   |   |   |   |  |   |   |   |   |   |   |   |   |  |   |   |   |   |   |   |   |   |  |   |   |   |   |   |   |   |   |  |   |   |   |   |   |   |   |   |  |   |   |   |   |   |   |   |   |  |   |   |   |   |   |   |   |   |  |   |   |   |   |   |   |   |   |  |   |   |   |   |   |   |   |   |  |   |   |   |   |   |   |   |   |  |   |   |   |   |   |   |   |   |  |   |   |   |   |   |   |   |   |  |   |   |   |   |   |   |   |   |
|         | 50                                                                                                                                                                                                                                                                                                                                                                                                                                                                                                                                                                                                                                                                                                                                                                                                                                                                                                                                                                                                                                                                                                                                                                                                                                                                                                                                                                                                                                                                                                       | A            | F   | A   | Y   | Q   | E   | A   |    |      |     |     |     |     |     |     |     |     |   |       |   |   |   |   |   |   |   |   |     |   |   |                                                                                                                                                                                                                                                                                                                                                                                                                                                                                                                                                                                                                                                                                |         |   |   |   |  |   |    |     |     |     |     |   |   |   |   |    |   |   |   |   |    |   |   |   |   |    |   |   |   |   |   |   |   |   |   |   |   |   |   |   |   |   |   |   |   |   |   |   |   |   |   |   |   |   |   |   |   |   |  |   |   |   |   |   |   |   |   |   |   |   |   |   |   |   |   |   |  |   |   |   |   |   |   |   |   |  |   |   |   |   |   |   |   |   |  |   |   |   |   |   |   |   |   |                                                                                                                                                                                                                                                                                                                                                                                                                                                                                                                                                                                                                                                                                                                                                                                                                                                                                                                                                                                                                                                                                                                                                                                                                                                                                                                                                                                                                                                                                                                                                                                                                                                                                                                                                                                                                                                                                                                                                                                                                                                                                                                                                                                                                                                                                                                                                                                                                                                                                                                                                                                                                                                                                                                                                                                                                                                                                                                                                                                                                                                                                                                                                                                                                                                                                                                                                                                                                                                                                                                                                                                                                                                                |         |  |  |  |  |  |  |  |      |  |   |     |     |     |     |     |     |   |       |   |   |   |   |   |   |   |  |    |   |   |   |   |   |   |   |  |   |   |   |   |   |   |   |   |  |   |   |   |   |   |   |   |   |  |   |   |   |   |   |   |   |   |  |   |   |   |   |   |   |   |   |  |   |   |   |   |   |   |   |   |  |   |   |   |   |   |   |   |   |  |   |   |   |   |   |   |   |   |  |   |   |   |   |   |   |   |   |  |   |   |   |   |   |   |   |   |  |   |   |   |   |   |   |   |   |  |   |   |   |   |   |   |   |   |   |       |   |   |   |   |   |   |   |  |     |   |   |   |   |   |   |   |  |    |   |   |   |   |   |   |   |  |    |   |   |   |   |   |   |   |  |    |   |   |   |   |   |   |   |  |    |   |   |   |   |   |   |   |  |    |   |   |   |   |   |   |   |  |   |   |   |   |   |   |   |   |  |   |   |   |   |   |   |   |   |  |   |   |   |   |   |   |   |   |  |   |   |   |   |   |   |   |   |  |   |   |   |   |   |   |   |   |  |   |   |   |   |   |   |   |   |  |   |   |   |   |   |   |   |   |  |   |   |   |   |   |   |   |   |  |   |   |   |   |   |   |   |   |  |   |   |   |   |   |   |   |   |  |   |   |   |   |   |   |   |   |  |   |   |   |   |   |   |   |   |   |     |   |   |   |   |   |   |   |  |   |   |   |   |   |   |   |   |                                                                                                                                                                                                                                                                                                                                                                                                                                                                                                                                                                                                                                                                                                                                                                                                                                                                                                                                                                                                                                                                                                                                                                                                                                                                                                                                                                                                                                                                                                                                                                                                                                                                                                                                                                                                                                                                                                                                                                                                                                                                                                                                                                                                                                                                                                                                                                                                                                                                                                                                                                                                                                                                                                                                                                                                                                                                                                                                                                                                                                                                                                                                                                                                                                                                                                                                                                                                                                                                                                                                                                                                                                                                                                                                                                  |         |  |  |  |  |  |  |  |      |  |   |     |     |     |     |     |     |       |       |   |   |   |   |   |   |   |  |     |   |   |   |   |   |   |   |  |     |   |   |   |   |   |   |   |  |     |   |   |   |   |   |   |   |  |    |   |   |   |   |   |   |   |  |    |   |   |   |   |   |   |   |  |    |   |   |   |   |   |   |   |  |    |   |   |   |   |   |   |   |  |    |   |   |   |   |   |   |   |  |    |   |   |   |   |   |   |   |  |   |   |   |   |   |   |   |   |  |   |   |   |   |   |   |   |   |  |   |   |   |   |   |   |   |   |  |   |   |   |   |   |   |   |   |  |   |   |   |   |   |   |   |   |  |   |   |   |   |   |   |   |   |  |   |   |   |   |   |   |   |   |  |   |   |   |   |   |   |   |   |  |   |   |   |   |   |   |   |   |  |   |   |   |   |   |   |   |   |  |   |   |   |   |   |   |   |   |  |   |   |   |   |   |   |   |   |  |   |   |   |   |   |   |   |   |  |   |   |   |   |   |   |   |   |  |   |   |   |   |   |   |   |   |  |   |   |   |   |   |   |   |   |  |   |   |   |   |   |   |   |   |  |   |   |   |   |   |   |   |   |  |   |   |   |   |   |   |   |   |  |   |   |   |   |   |   |   |   |  |   |   |   |   |   |   |   |   |  |   |   |   |   |   |   |   |   |  |   |   |   |   |   |   |   |   |  |   |   |   |   |   |   |   |   |  |   |   |   |   |   |   |   |   |
|         | 9                                                                                                                                                                                                                                                                                                                                                                                                                                                                                                                                                                                                                                                                                                                                                                                                                                                                                                                                                                                                                                                                                                                                                                                                                                                                                                                                                                                                                                                                                                        | A            | Y   | A   | I   | R   | E   | T   |    |      |     |     |     |     |     |     |     |     |   |       |   |   |   |   |   |   |   |   |     |   |   |                                                                                                                                                                                                                                                                                                                                                                                                                                                                                                                                                                                                                                                                                |         |   |   |   |  |   |    |     |     |     |     |   |   |   |   |    |   |   |   |   |    |   |   |   |   |    |   |   |   |   |   |   |   |   |   |   |   |   |   |   |   |   |   |   |   |   |   |   |   |   |   |   |   |   |   |   |   |   |  |   |   |   |   |   |   |   |   |   |   |   |   |   |   |   |   |   |  |   |   |   |   |   |   |   |   |  |   |   |   |   |   |   |   |   |  |   |   |   |   |   |   |   |   |                                                                                                                                                                                                                                                                                                                                                                                                                                                                                                                                                                                                                                                                                                                                                                                                                                                                                                                                                                                                                                                                                                                                                                                                                                                                                                                                                                                                                                                                                                                                                                                                                                                                                                                                                                                                                                                                                                                                                                                                                                                                                                                                                                                                                                                                                                                                                                                                                                                                                                                                                                                                                                                                                                                                                                                                                                                                                                                                                                                                                                                                                                                                                                                                                                                                                                                                                                                                                                                                                                                                                                                                                                                                |         |  |  |  |  |  |  |  |      |  |   |     |     |     |     |     |     |   |       |   |   |   |   |   |   |   |  |    |   |   |   |   |   |   |   |  |   |   |   |   |   |   |   |   |  |   |   |   |   |   |   |   |   |  |   |   |   |   |   |   |   |   |  |   |   |   |   |   |   |   |   |  |   |   |   |   |   |   |   |   |  |   |   |   |   |   |   |   |   |  |   |   |   |   |   |   |   |   |  |   |   |   |   |   |   |   |   |  |   |   |   |   |   |   |   |   |  |   |   |   |   |   |   |   |   |  |   |   |   |   |   |   |   |   |   |       |   |   |   |   |   |   |   |  |     |   |   |   |   |   |   |   |  |    |   |   |   |   |   |   |   |  |    |   |   |   |   |   |   |   |  |    |   |   |   |   |   |   |   |  |    |   |   |   |   |   |   |   |  |    |   |   |   |   |   |   |   |  |   |   |   |   |   |   |   |   |  |   |   |   |   |   |   |   |   |  |   |   |   |   |   |   |   |   |  |   |   |   |   |   |   |   |   |  |   |   |   |   |   |   |   |   |  |   |   |   |   |   |   |   |   |  |   |   |   |   |   |   |   |   |  |   |   |   |   |   |   |   |   |  |   |   |   |   |   |   |   |   |  |   |   |   |   |   |   |   |   |  |   |   |   |   |   |   |   |   |  |   |   |   |   |   |   |   |   |   |     |   |   |   |   |   |   |   |  |   |   |   |   |   |   |   |   |                                                                                                                                                                                                                                                                                                                                                                                                                                                                                                                                                                                                                                                                                                                                                                                                                                                                                                                                                                                                                                                                                                                                                                                                                                                                                                                                                                                                                                                                                                                                                                                                                                                                                                                                                                                                                                                                                                                                                                                                                                                                                                                                                                                                                                                                                                                                                                                                                                                                                                                                                                                                                                                                                                                                                                                                                                                                                                                                                                                                                                                                                                                                                                                                                                                                                                                                                                                                                                                                                                                                                                                                                                                                                                                                                                  |         |  |  |  |  |  |  |  |      |  |   |     |     |     |     |     |     |       |       |   |   |   |   |   |   |   |  |     |   |   |   |   |   |   |   |  |     |   |   |   |   |   |   |   |  |     |   |   |   |   |   |   |   |  |    |   |   |   |   |   |   |   |  |    |   |   |   |   |   |   |   |  |    |   |   |   |   |   |   |   |  |    |   |   |   |   |   |   |   |  |    |   |   |   |   |   |   |   |  |    |   |   |   |   |   |   |   |  |   |   |   |   |   |   |   |   |  |   |   |   |   |   |   |   |   |  |   |   |   |   |   |   |   |   |  |   |   |   |   |   |   |   |   |  |   |   |   |   |   |   |   |   |  |   |   |   |   |   |   |   |   |  |   |   |   |   |   |   |   |   |  |   |   |   |   |   |   |   |   |  |   |   |   |   |   |   |   |   |  |   |   |   |   |   |   |   |   |  |   |   |   |   |   |   |   |   |  |   |   |   |   |   |   |   |   |  |   |   |   |   |   |   |   |   |  |   |   |   |   |   |   |   |   |  |   |   |   |   |   |   |   |   |  |   |   |   |   |   |   |   |   |  |   |   |   |   |   |   |   |   |  |   |   |   |   |   |   |   |   |  |   |   |   |   |   |   |   |   |  |   |   |   |   |   |   |   |   |  |   |   |   |   |   |   |   |   |  |   |   |   |   |   |   |   |   |  |   |   |   |   |   |   |   |   |  |   |   |   |   |   |   |   |   |  |   |   |   |   |   |   |   |   |
|         | 3                                                                                                                                                                                                                                                                                                                                                                                                                                                                                                                                                                                                                                                                                                                                                                                                                                                                                                                                                                                                                                                                                                                                                                                                                                                                                                                                                                                                                                                                                                        | A            | Y   | A   | I   | Q   | E   | T   |    |      |     |     |     |     |     |     |     |     |   |       |   |   |   |   |   |   |   |   |     |   |   |                                                                                                                                                                                                                                                                                                                                                                                                                                                                                                                                                                                                                                                                                |         |   |   |   |  |   |    |     |     |     |     |   |   |   |   |    |   |   |   |   |    |   |   |   |   |    |   |   |   |   |   |   |   |   |   |   |   |   |   |   |   |   |   |   |   |   |   |   |   |   |   |   |   |   |   |   |   |   |  |   |   |   |   |   |   |   |   |   |   |   |   |   |   |   |   |   |  |   |   |   |   |   |   |   |   |  |   |   |   |   |   |   |   |   |  |   |   |   |   |   |   |   |   |                                                                                                                                                                                                                                                                                                                                                                                                                                                                                                                                                                                                                                                                                                                                                                                                                                                                                                                                                                                                                                                                                                                                                                                                                                                                                                                                                                                                                                                                                                                                                                                                                                                                                                                                                                                                                                                                                                                                                                                                                                                                                                                                                                                                                                                                                                                                                                                                                                                                                                                                                                                                                                                                                                                                                                                                                                                                                                                                                                                                                                                                                                                                                                                                                                                                                                                                                                                                                                                                                                                                                                                                                                                                |         |  |  |  |  |  |  |  |      |  |   |     |     |     |     |     |     |   |       |   |   |   |   |   |   |   |  |    |   |   |   |   |   |   |   |  |   |   |   |   |   |   |   |   |  |   |   |   |   |   |   |   |   |  |   |   |   |   |   |   |   |   |  |   |   |   |   |   |   |   |   |  |   |   |   |   |   |   |   |   |  |   |   |   |   |   |   |   |   |  |   |   |   |   |   |   |   |   |  |   |   |   |   |   |   |   |   |  |   |   |   |   |   |   |   |   |  |   |   |   |   |   |   |   |   |  |   |   |   |   |   |   |   |   |   |       |   |   |   |   |   |   |   |  |     |   |   |   |   |   |   |   |  |    |   |   |   |   |   |   |   |  |    |   |   |   |   |   |   |   |  |    |   |   |   |   |   |   |   |  |    |   |   |   |   |   |   |   |  |    |   |   |   |   |   |   |   |  |   |   |   |   |   |   |   |   |  |   |   |   |   |   |   |   |   |  |   |   |   |   |   |   |   |   |  |   |   |   |   |   |   |   |   |  |   |   |   |   |   |   |   |   |  |   |   |   |   |   |   |   |   |  |   |   |   |   |   |   |   |   |  |   |   |   |   |   |   |   |   |  |   |   |   |   |   |   |   |   |  |   |   |   |   |   |   |   |   |  |   |   |   |   |   |   |   |   |  |   |   |   |   |   |   |   |   |   |     |   |   |   |   |   |   |   |  |   |   |   |   |   |   |   |   |                                                                                                                                                                                                                                                                                                                                                                                                                                                                                                                                                                                                                                                                                                                                                                                                                                                                                                                                                                                                                                                                                                                                                                                                                                                                                                                                                                                                                                                                                                                                                                                                                                                                                                                                                                                                                                                                                                                                                                                                                                                                                                                                                                                                                                                                                                                                                                                                                                                                                                                                                                                                                                                                                                                                                                                                                                                                                                                                                                                                                                                                                                                                                                                                                                                                                                                                                                                                                                                                                                                                                                                                                                                                                                                                                                  |         |  |  |  |  |  |  |  |      |  |   |     |     |     |     |     |     |       |       |   |   |   |   |   |   |   |  |     |   |   |   |   |   |   |   |  |     |   |   |   |   |   |   |   |  |     |   |   |   |   |   |   |   |  |    |   |   |   |   |   |   |   |  |    |   |   |   |   |   |   |   |  |    |   |   |   |   |   |   |   |  |    |   |   |   |   |   |   |   |  |    |   |   |   |   |   |   |   |  |    |   |   |   |   |   |   |   |  |   |   |   |   |   |   |   |   |  |   |   |   |   |   |   |   |   |  |   |   |   |   |   |   |   |   |  |   |   |   |   |   |   |   |   |  |   |   |   |   |   |   |   |   |  |   |   |   |   |   |   |   |   |  |   |   |   |   |   |   |   |   |  |   |   |   |   |   |   |   |   |  |   |   |   |   |   |   |   |   |  |   |   |   |   |   |   |   |   |  |   |   |   |   |   |   |   |   |  |   |   |   |   |   |   |   |   |  |   |   |   |   |   |   |   |   |  |   |   |   |   |   |   |   |   |  |   |   |   |   |   |   |   |   |  |   |   |   |   |   |   |   |   |  |   |   |   |   |   |   |   |   |  |   |   |   |   |   |   |   |   |  |   |   |   |   |   |   |   |   |  |   |   |   |   |   |   |   |   |  |   |   |   |   |   |   |   |   |  |   |   |   |   |   |   |   |   |  |   |   |   |   |   |   |   |   |  |   |   |   |   |   |   |   |   |  |   |   |   |   |   |   |   |   |
|         | 2                                                                                                                                                                                                                                                                                                                                                                                                                                                                                                                                                                                                                                                                                                                                                                                                                                                                                                                                                                                                                                                                                                                                                                                                                                                                                                                                                                                                                                                                                                        | A            | F   | N   | N   | Q   | E   | T   |    |      |     |     |     |     |     |     |     |     |   |       |   |   |   |   |   |   |   |   |     |   |   |                                                                                                                                                                                                                                                                                                                                                                                                                                                                                                                                                                                                                                                                                |         |   |   |   |  |   |    |     |     |     |     |   |   |   |   |    |   |   |   |   |    |   |   |   |   |    |   |   |   |   |   |   |   |   |   |   |   |   |   |   |   |   |   |   |   |   |   |   |   |   |   |   |   |   |   |   |   |   |  |   |   |   |   |   |   |   |   |   |   |   |   |   |   |   |   |   |  |   |   |   |   |   |   |   |   |  |   |   |   |   |   |   |   |   |  |   |   |   |   |   |   |   |   |                                                                                                                                                                                                                                                                                                                                                                                                                                                                                                                                                                                                                                                                                                                                                                                                                                                                                                                                                                                                                                                                                                                                                                                                                                                                                                                                                                                                                                                                                                                                                                                                                                                                                                                                                                                                                                                                                                                                                                                                                                                                                                                                                                                                                                                                                                                                                                                                                                                                                                                                                                                                                                                                                                                                                                                                                                                                                                                                                                                                                                                                                                                                                                                                                                                                                                                                                                                                                                                                                                                                                                                                                                                                |         |  |  |  |  |  |  |  |      |  |   |     |     |     |     |     |     |   |       |   |   |   |   |   |   |   |  |    |   |   |   |   |   |   |   |  |   |   |   |   |   |   |   |   |  |   |   |   |   |   |   |   |   |  |   |   |   |   |   |   |   |   |  |   |   |   |   |   |   |   |   |  |   |   |   |   |   |   |   |   |  |   |   |   |   |   |   |   |   |  |   |   |   |   |   |   |   |   |  |   |   |   |   |   |   |   |   |  |   |   |   |   |   |   |   |   |  |   |   |   |   |   |   |   |   |  |   |   |   |   |   |   |   |   |   |       |   |   |   |   |   |   |   |  |     |   |   |   |   |   |   |   |  |    |   |   |   |   |   |   |   |  |    |   |   |   |   |   |   |   |  |    |   |   |   |   |   |   |   |  |    |   |   |   |   |   |   |   |  |    |   |   |   |   |   |   |   |  |   |   |   |   |   |   |   |   |  |   |   |   |   |   |   |   |   |  |   |   |   |   |   |   |   |   |  |   |   |   |   |   |   |   |   |  |   |   |   |   |   |   |   |   |  |   |   |   |   |   |   |   |   |  |   |   |   |   |   |   |   |   |  |   |   |   |   |   |   |   |   |  |   |   |   |   |   |   |   |   |  |   |   |   |   |   |   |   |   |  |   |   |   |   |   |   |   |   |  |   |   |   |   |   |   |   |   |   |     |   |   |   |   |   |   |   |  |   |   |   |   |   |   |   |   |                                                                                                                                                                                                                                                                                                                                                                                                                                                                                                                                                                                                                                                                                                                                                                                                                                                                                                                                                                                                                                                                                                                                                                                                                                                                                                                                                                                                                                                                                                                                                                                                                                                                                                                                                                                                                                                                                                                                                                                                                                                                                                                                                                                                                                                                                                                                                                                                                                                                                                                                                                                                                                                                                                                                                                                                                                                                                                                                                                                                                                                                                                                                                                                                                                                                                                                                                                                                                                                                                                                                                                                                                                                                                                                                                                  |         |  |  |  |  |  |  |  |      |  |   |     |     |     |     |     |     |       |       |   |   |   |   |   |   |   |  |     |   |   |   |   |   |   |   |  |     |   |   |   |   |   |   |   |  |     |   |   |   |   |   |   |   |  |    |   |   |   |   |   |   |   |  |    |   |   |   |   |   |   |   |  |    |   |   |   |   |   |   |   |  |    |   |   |   |   |   |   |   |  |    |   |   |   |   |   |   |   |  |    |   |   |   |   |   |   |   |  |   |   |   |   |   |   |   |   |  |   |   |   |   |   |   |   |   |  |   |   |   |   |   |   |   |   |  |   |   |   |   |   |   |   |   |  |   |   |   |   |   |   |   |   |  |   |   |   |   |   |   |   |   |  |   |   |   |   |   |   |   |   |  |   |   |   |   |   |   |   |   |  |   |   |   |   |   |   |   |   |  |   |   |   |   |   |   |   |   |  |   |   |   |   |   |   |   |   |  |   |   |   |   |   |   |   |   |  |   |   |   |   |   |   |   |   |  |   |   |   |   |   |   |   |   |  |   |   |   |   |   |   |   |   |  |   |   |   |   |   |   |   |   |  |   |   |   |   |   |   |   |   |  |   |   |   |   |   |   |   |   |  |   |   |   |   |   |   |   |   |  |   |   |   |   |   |   |   |   |  |   |   |   |   |   |   |   |   |  |   |   |   |   |   |   |   |   |  |   |   |   |   |   |   |   |   |  |   |   |   |   |   |   |   |   |  |   |   |   |   |   |   |   |   |
|         | 2                                                                                                                                                                                                                                                                                                                                                                                                                                                                                                                                                                                                                                                                                                                                                                                                                                                                                                                                                                                                                                                                                                                                                                                                                                                                                                                                                                                                                                                                                                        | A            | F   | A   | Y   | Q   | E   | S   |    |      |     |     |     |     |     |     |     |     |   |       |   |   |   |   |   |   |   |   |     |   |   |                                                                                                                                                                                                                                                                                                                                                                                                                                                                                                                                                                                                                                                                                |         |   |   |   |  |   |    |     |     |     |     |   |   |   |   |    |   |   |   |   |    |   |   |   |   |    |   |   |   |   |   |   |   |   |   |   |   |   |   |   |   |   |   |   |   |   |   |   |   |   |   |   |   |   |   |   |   |   |  |   |   |   |   |   |   |   |   |   |   |   |   |   |   |   |   |   |  |   |   |   |   |   |   |   |   |  |   |   |   |   |   |   |   |   |  |   |   |   |   |   |   |   |   |                                                                                                                                                                                                                                                                                                                                                                                                                                                                                                                                                                                                                                                                                                                                                                                                                                                                                                                                                                                                                                                                                                                                                                                                                                                                                                                                                                                                                                                                                                                                                                                                                                                                                                                                                                                                                                                                                                                                                                                                                                                                                                                                                                                                                                                                                                                                                                                                                                                                                                                                                                                                                                                                                                                                                                                                                                                                                                                                                                                                                                                                                                                                                                                                                                                                                                                                                                                                                                                                                                                                                                                                                                                                |         |  |  |  |  |  |  |  |      |  |   |     |     |     |     |     |     |   |       |   |   |   |   |   |   |   |  |    |   |   |   |   |   |   |   |  |   |   |   |   |   |   |   |   |  |   |   |   |   |   |   |   |   |  |   |   |   |   |   |   |   |   |  |   |   |   |   |   |   |   |   |  |   |   |   |   |   |   |   |   |  |   |   |   |   |   |   |   |   |  |   |   |   |   |   |   |   |   |  |   |   |   |   |   |   |   |   |  |   |   |   |   |   |   |   |   |  |   |   |   |   |   |   |   |   |  |   |   |   |   |   |   |   |   |   |       |   |   |   |   |   |   |   |  |     |   |   |   |   |   |   |   |  |    |   |   |   |   |   |   |   |  |    |   |   |   |   |   |   |   |  |    |   |   |   |   |   |   |   |  |    |   |   |   |   |   |   |   |  |    |   |   |   |   |   |   |   |  |   |   |   |   |   |   |   |   |  |   |   |   |   |   |   |   |   |  |   |   |   |   |   |   |   |   |  |   |   |   |   |   |   |   |   |  |   |   |   |   |   |   |   |   |  |   |   |   |   |   |   |   |   |  |   |   |   |   |   |   |   |   |  |   |   |   |   |   |   |   |   |  |   |   |   |   |   |   |   |   |  |   |   |   |   |   |   |   |   |  |   |   |   |   |   |   |   |   |  |   |   |   |   |   |   |   |   |   |     |   |   |   |   |   |   |   |  |   |   |   |   |   |   |   |   |                                                                                                                                                                                                                                                                                                                                                                                                                                                                                                                                                                                                                                                                                                                                                                                                                                                                                                                                                                                                                                                                                                                                                                                                                                                                                                                                                                                                                                                                                                                                                                                                                                                                                                                                                                                                                                                                                                                                                                                                                                                                                                                                                                                                                                                                                                                                                                                                                                                                                                                                                                                                                                                                                                                                                                                                                                                                                                                                                                                                                                                                                                                                                                                                                                                                                                                                                                                                                                                                                                                                                                                                                                                                                                                                                                  |         |  |  |  |  |  |  |  |      |  |   |     |     |     |     |     |     |       |       |   |   |   |   |   |   |   |  |     |   |   |   |   |   |   |   |  |     |   |   |   |   |   |   |   |  |     |   |   |   |   |   |   |   |  |    |   |   |   |   |   |   |   |  |    |   |   |   |   |   |   |   |  |    |   |   |   |   |   |   |   |  |    |   |   |   |   |   |   |   |  |    |   |   |   |   |   |   |   |  |    |   |   |   |   |   |   |   |  |   |   |   |   |   |   |   |   |  |   |   |   |   |   |   |   |   |  |   |   |   |   |   |   |   |   |  |   |   |   |   |   |   |   |   |  |   |   |   |   |   |   |   |   |  |   |   |   |   |   |   |   |   |  |   |   |   |   |   |   |   |   |  |   |   |   |   |   |   |   |   |  |   |   |   |   |   |   |   |   |  |   |   |   |   |   |   |   |   |  |   |   |   |   |   |   |   |   |  |   |   |   |   |   |   |   |   |  |   |   |   |   |   |   |   |   |  |   |   |   |   |   |   |   |   |  |   |   |   |   |   |   |   |   |  |   |   |   |   |   |   |   |   |  |   |   |   |   |   |   |   |   |  |   |   |   |   |   |   |   |   |  |   |   |   |   |   |   |   |   |  |   |   |   |   |   |   |   |   |  |   |   |   |   |   |   |   |   |  |   |   |   |   |   |   |   |   |  |   |   |   |   |   |   |   |   |  |   |   |   |   |   |   |   |   |  |   |   |   |   |   |   |   |   |
|         | 1                                                                                                                                                                                                                                                                                                                                                                                                                                                                                                                                                                                                                                                                                                                                                                                                                                                                                                                                                                                                                                                                                                                                                                                                                                                                                                                                                                                                                                                                                                        | A            | F   | S   | Y   | Q   | E   | T   |    |      |     |     |     |     |     |     |     |     |   |       |   |   |   |   |   |   |   |   |     |   |   |                                                                                                                                                                                                                                                                                                                                                                                                                                                                                                                                                                                                                                                                                |         |   |   |   |  |   |    |     |     |     |     |   |   |   |   |    |   |   |   |   |    |   |   |   |   |    |   |   |   |   |   |   |   |   |   |   |   |   |   |   |   |   |   |   |   |   |   |   |   |   |   |   |   |   |   |   |   |   |  |   |   |   |   |   |   |   |   |   |   |   |   |   |   |   |   |   |  |   |   |   |   |   |   |   |   |  |   |   |   |   |   |   |   |   |  |   |   |   |   |   |   |   |   |                                                                                                                                                                                                                                                                                                                                                                                                                                                                                                                                                                                                                                                                                                                                                                                                                                                                                                                                                                                                                                                                                                                                                                                                                                                                                                                                                                                                                                                                                                                                                                                                                                                                                                                                                                                                                                                                                                                                                                                                                                                                                                                                                                                                                                                                                                                                                                                                                                                                                                                                                                                                                                                                                                                                                                                                                                                                                                                                                                                                                                                                                                                                                                                                                                                                                                                                                                                                                                                                                                                                                                                                                                                                |         |  |  |  |  |  |  |  |      |  |   |     |     |     |     |     |     |   |       |   |   |   |   |   |   |   |  |    |   |   |   |   |   |   |   |  |   |   |   |   |   |   |   |   |  |   |   |   |   |   |   |   |   |  |   |   |   |   |   |   |   |   |  |   |   |   |   |   |   |   |   |  |   |   |   |   |   |   |   |   |  |   |   |   |   |   |   |   |   |  |   |   |   |   |   |   |   |   |  |   |   |   |   |   |   |   |   |  |   |   |   |   |   |   |   |   |  |   |   |   |   |   |   |   |   |  |   |   |   |   |   |   |   |   |   |       |   |   |   |   |   |   |   |  |     |   |   |   |   |   |   |   |  |    |   |   |   |   |   |   |   |  |    |   |   |   |   |   |   |   |  |    |   |   |   |   |   |   |   |  |    |   |   |   |   |   |   |   |  |    |   |   |   |   |   |   |   |  |   |   |   |   |   |   |   |   |  |   |   |   |   |   |   |   |   |  |   |   |   |   |   |   |   |   |  |   |   |   |   |   |   |   |   |  |   |   |   |   |   |   |   |   |  |   |   |   |   |   |   |   |   |  |   |   |   |   |   |   |   |   |  |   |   |   |   |   |   |   |   |  |   |   |   |   |   |   |   |   |  |   |   |   |   |   |   |   |   |  |   |   |   |   |   |   |   |   |  |   |   |   |   |   |   |   |   |   |     |   |   |   |   |   |   |   |  |   |   |   |   |   |   |   |   |                                                                                                                                                                                                                                                                                                                                                                                                                                                                                                                                                                                                                                                                                                                                                                                                                                                                                                                                                                                                                                                                                                                                                                                                                                                                                                                                                                                                                                                                                                                                                                                                                                                                                                                                                                                                                                                                                                                                                                                                                                                                                                                                                                                                                                                                                                                                                                                                                                                                                                                                                                                                                                                                                                                                                                                                                                                                                                                                                                                                                                                                                                                                                                                                                                                                                                                                                                                                                                                                                                                                                                                                                                                                                                                                                                  |         |  |  |  |  |  |  |  |      |  |   |     |     |     |     |     |     |       |       |   |   |   |   |   |   |   |  |     |   |   |   |   |   |   |   |  |     |   |   |   |   |   |   |   |  |     |   |   |   |   |   |   |   |  |    |   |   |   |   |   |   |   |  |    |   |   |   |   |   |   |   |  |    |   |   |   |   |   |   |   |  |    |   |   |   |   |   |   |   |  |    |   |   |   |   |   |   |   |  |    |   |   |   |   |   |   |   |  |   |   |   |   |   |   |   |   |  |   |   |   |   |   |   |   |   |  |   |   |   |   |   |   |   |   |  |   |   |   |   |   |   |   |   |  |   |   |   |   |   |   |   |   |  |   |   |   |   |   |   |   |   |  |   |   |   |   |   |   |   |   |  |   |   |   |   |   |   |   |   |  |   |   |   |   |   |   |   |   |  |   |   |   |   |   |   |   |   |  |   |   |   |   |   |   |   |   |  |   |   |   |   |   |   |   |   |  |   |   |   |   |   |   |   |   |  |   |   |   |   |   |   |   |   |  |   |   |   |   |   |   |   |   |  |   |   |   |   |   |   |   |   |  |   |   |   |   |   |   |   |   |  |   |   |   |   |   |   |   |   |  |   |   |   |   |   |   |   |   |  |   |   |   |   |   |   |   |   |  |   |   |   |   |   |   |   |   |  |   |   |   |   |   |   |   |   |  |   |   |   |   |   |   |   |   |  |   |   |   |   |   |   |   |   |  |   |   |   |   |   |   |   |   |
|         | 1                                                                                                                                                                                                                                                                                                                                                                                                                                                                                                                                                                                                                                                                                                                                                                                                                                                                                                                                                                                                                                                                                                                                                                                                                                                                                                                                                                                                                                                                                                        | G            | Y   | A   | I   | Q   | E   | T   |    |      |     |     |     |     |     |     |     |     |   |       |   |   |   |   |   |   |   |   |     |   |   |                                                                                                                                                                                                                                                                                                                                                                                                                                                                                                                                                                                                                                                                                |         |   |   |   |  |   |    |     |     |     |     |   |   |   |   |    |   |   |   |   |    |   |   |   |   |    |   |   |   |   |   |   |   |   |   |   |   |   |   |   |   |   |   |   |   |   |   |   |   |   |   |   |   |   |   |   |   |   |  |   |   |   |   |   |   |   |   |   |   |   |   |   |   |   |   |   |  |   |   |   |   |   |   |   |   |  |   |   |   |   |   |   |   |   |  |   |   |   |   |   |   |   |   |                                                                                                                                                                                                                                                                                                                                                                                                                                                                                                                                                                                                                                                                                                                                                                                                                                                                                                                                                                                                                                                                                                                                                                                                                                                                                                                                                                                                                                                                                                                                                                                                                                                                                                                                                                                                                                                                                                                                                                                                                                                                                                                                                                                                                                                                                                                                                                                                                                                                                                                                                                                                                                                                                                                                                                                                                                                                                                                                                                                                                                                                                                                                                                                                                                                                                                                                                                                                                                                                                                                                                                                                                                                                |         |  |  |  |  |  |  |  |      |  |   |     |     |     |     |     |     |   |       |   |   |   |   |   |   |   |  |    |   |   |   |   |   |   |   |  |   |   |   |   |   |   |   |   |  |   |   |   |   |   |   |   |   |  |   |   |   |   |   |   |   |   |  |   |   |   |   |   |   |   |   |  |   |   |   |   |   |   |   |   |  |   |   |   |   |   |   |   |   |  |   |   |   |   |   |   |   |   |  |   |   |   |   |   |   |   |   |  |   |   |   |   |   |   |   |   |  |   |   |   |   |   |   |   |   |  |   |   |   |   |   |   |   |   |   |       |   |   |   |   |   |   |   |  |     |   |   |   |   |   |   |   |  |    |   |   |   |   |   |   |   |  |    |   |   |   |   |   |   |   |  |    |   |   |   |   |   |   |   |  |    |   |   |   |   |   |   |   |  |    |   |   |   |   |   |   |   |  |   |   |   |   |   |   |   |   |  |   |   |   |   |   |   |   |   |  |   |   |   |   |   |   |   |   |  |   |   |   |   |   |   |   |   |  |   |   |   |   |   |   |   |   |  |   |   |   |   |   |   |   |   |  |   |   |   |   |   |   |   |   |  |   |   |   |   |   |   |   |   |  |   |   |   |   |   |   |   |   |  |   |   |   |   |   |   |   |   |  |   |   |   |   |   |   |   |   |  |   |   |   |   |   |   |   |   |   |     |   |   |   |   |   |   |   |  |   |   |   |   |   |   |   |   |                                                                                                                                                                                                                                                                                                                                                                                                                                                                                                                                                                                                                                                                                                                                                                                                                                                                                                                                                                                                                                                                                                                                                                                                                                                                                                                                                                                                                                                                                                                                                                                                                                                                                                                                                                                                                                                                                                                                                                                                                                                                                                                                                                                                                                                                                                                                                                                                                                                                                                                                                                                                                                                                                                                                                                                                                                                                                                                                                                                                                                                                                                                                                                                                                                                                                                                                                                                                                                                                                                                                                                                                                                                                                                                                                                  |         |  |  |  |  |  |  |  |      |  |   |     |     |     |     |     |     |       |       |   |   |   |   |   |   |   |  |     |   |   |   |   |   |   |   |  |     |   |   |   |   |   |   |   |  |     |   |   |   |   |   |   |   |  |    |   |   |   |   |   |   |   |  |    |   |   |   |   |   |   |   |  |    |   |   |   |   |   |   |   |  |    |   |   |   |   |   |   |   |  |    |   |   |   |   |   |   |   |  |    |   |   |   |   |   |   |   |  |   |   |   |   |   |   |   |   |  |   |   |   |   |   |   |   |   |  |   |   |   |   |   |   |   |   |  |   |   |   |   |   |   |   |   |  |   |   |   |   |   |   |   |   |  |   |   |   |   |   |   |   |   |  |   |   |   |   |   |   |   |   |  |   |   |   |   |   |   |   |   |  |   |   |   |   |   |   |   |   |  |   |   |   |   |   |   |   |   |  |   |   |   |   |   |   |   |   |  |   |   |   |   |   |   |   |   |  |   |   |   |   |   |   |   |   |  |   |   |   |   |   |   |   |   |  |   |   |   |   |   |   |   |   |  |   |   |   |   |   |   |   |   |  |   |   |   |   |   |   |   |   |  |   |   |   |   |   |   |   |   |  |   |   |   |   |   |   |   |   |  |   |   |   |   |   |   |   |   |  |   |   |   |   |   |   |   |   |  |   |   |   |   |   |   |   |   |  |   |   |   |   |   |   |   |   |  |   |   |   |   |   |   |   |   |  |   |   |   |   |   |   |   |   |
|         | 1                                                                                                                                                                                                                                                                                                                                                                                                                                                                                                                                                                                                                                                                                                                                                                                                                                                                                                                                                                                                                                                                                                                                                                                                                                                                                                                                                                                                                                                                                                        | A            | Y   | A   | I   | Q   | E   | A   |    |      |     |     |     |     |     |     |     |     |   |       |   |   |   |   |   |   |   |   |     |   |   |                                                                                                                                                                                                                                                                                                                                                                                                                                                                                                                                                                                                                                                                                |         |   |   |   |  |   |    |     |     |     |     |   |   |   |   |    |   |   |   |   |    |   |   |   |   |    |   |   |   |   |   |   |   |   |   |   |   |   |   |   |   |   |   |   |   |   |   |   |   |   |   |   |   |   |   |   |   |   |  |   |   |   |   |   |   |   |   |   |   |   |   |   |   |   |   |   |  |   |   |   |   |   |   |   |   |  |   |   |   |   |   |   |   |   |  |   |   |   |   |   |   |   |   |                                                                                                                                                                                                                                                                                                                                                                                                                                                                                                                                                                                                                                                                                                                                                                                                                                                                                                                                                                                                                                                                                                                                                                                                                                                                                                                                                                                                                                                                                                                                                                                                                                                                                                                                                                                                                                                                                                                                                                                                                                                                                                                                                                                                                                                                                                                                                                                                                                                                                                                                                                                                                                                                                                                                                                                                                                                                                                                                                                                                                                                                                                                                                                                                                                                                                                                                                                                                                                                                                                                                                                                                                                                                |         |  |  |  |  |  |  |  |      |  |   |     |     |     |     |     |     |   |       |   |   |   |   |   |   |   |  |    |   |   |   |   |   |   |   |  |   |   |   |   |   |   |   |   |  |   |   |   |   |   |   |   |   |  |   |   |   |   |   |   |   |   |  |   |   |   |   |   |   |   |   |  |   |   |   |   |   |   |   |   |  |   |   |   |   |   |   |   |   |  |   |   |   |   |   |   |   |   |  |   |   |   |   |   |   |   |   |  |   |   |   |   |   |   |   |   |  |   |   |   |   |   |   |   |   |  |   |   |   |   |   |   |   |   |   |       |   |   |   |   |   |   |   |  |     |   |   |   |   |   |   |   |  |    |   |   |   |   |   |   |   |  |    |   |   |   |   |   |   |   |  |    |   |   |   |   |   |   |   |  |    |   |   |   |   |   |   |   |  |    |   |   |   |   |   |   |   |  |   |   |   |   |   |   |   |   |  |   |   |   |   |   |   |   |   |  |   |   |   |   |   |   |   |   |  |   |   |   |   |   |   |   |   |  |   |   |   |   |   |   |   |   |  |   |   |   |   |   |   |   |   |  |   |   |   |   |   |   |   |   |  |   |   |   |   |   |   |   |   |  |   |   |   |   |   |   |   |   |  |   |   |   |   |   |   |   |   |  |   |   |   |   |   |   |   |   |  |   |   |   |   |   |   |   |   |   |     |   |   |   |   |   |   |   |  |   |   |   |   |   |   |   |   |                                                                                                                                                                                                                                                                                                                                                                                                                                                                                                                                                                                                                                                                                                                                                                                                                                                                                                                                                                                                                                                                                                                                                                                                                                                                                                                                                                                                                                                                                                                                                                                                                                                                                                                                                                                                                                                                                                                                                                                                                                                                                                                                                                                                                                                                                                                                                                                                                                                                                                                                                                                                                                                                                                                                                                                                                                                                                                                                                                                                                                                                                                                                                                                                                                                                                                                                                                                                                                                                                                                                                                                                                                                                                                                                                                  |         |  |  |  |  |  |  |  |      |  |   |     |     |     |     |     |     |       |       |   |   |   |   |   |   |   |  |     |   |   |   |   |   |   |   |  |     |   |   |   |   |   |   |   |  |     |   |   |   |   |   |   |   |  |    |   |   |   |   |   |   |   |  |    |   |   |   |   |   |   |   |  |    |   |   |   |   |   |   |   |  |    |   |   |   |   |   |   |   |  |    |   |   |   |   |   |   |   |  |    |   |   |   |   |   |   |   |  |   |   |   |   |   |   |   |   |  |   |   |   |   |   |   |   |   |  |   |   |   |   |   |   |   |   |  |   |   |   |   |   |   |   |   |  |   |   |   |   |   |   |   |   |  |   |   |   |   |   |   |   |   |  |   |   |   |   |   |   |   |   |  |   |   |   |   |   |   |   |   |  |   |   |   |   |   |   |   |   |  |   |   |   |   |   |   |   |   |  |   |   |   |   |   |   |   |   |  |   |   |   |   |   |   |   |   |  |   |   |   |   |   |   |   |   |  |   |   |   |   |   |   |   |   |  |   |   |   |   |   |   |   |   |  |   |   |   |   |   |   |   |   |  |   |   |   |   |   |   |   |   |  |   |   |   |   |   |   |   |   |  |   |   |   |   |   |   |   |   |  |   |   |   |   |   |   |   |   |  |   |   |   |   |   |   |   |   |  |   |   |   |   |   |   |   |   |  |   |   |   |   |   |   |   |   |  |   |   |   |   |   |   |   |   |  |   |   |   |   |   |   |   |   |
|         | 1                                                                                                                                                                                                                                                                                                                                                                                                                                                                                                                                                                                                                                                                                                                                                                                                                                                                                                                                                                                                                                                                                                                                                                                                                                                                                                                                                                                                                                                                                                        | A            | F   | A   | Y   | R   | E   | T   |    |      |     |     |     |     |     |     |     |     |   |       |   |   |   |   |   |   |   |   |     |   |   |                                                                                                                                                                                                                                                                                                                                                                                                                                                                                                                                                                                                                                                                                |         |   |   |   |  |   |    |     |     |     |     |   |   |   |   |    |   |   |   |   |    |   |   |   |   |    |   |   |   |   |   |   |   |   |   |   |   |   |   |   |   |   |   |   |   |   |   |   |   |   |   |   |   |   |   |   |   |   |  |   |   |   |   |   |   |   |   |   |   |   |   |   |   |   |   |   |  |   |   |   |   |   |   |   |   |  |   |   |   |   |   |   |   |   |  |   |   |   |   |   |   |   |   |                                                                                                                                                                                                                                                                                                                                                                                                                                                                                                                                                                                                                                                                                                                                                                                                                                                                                                                                                                                                                                                                                                                                                                                                                                                                                                                                                                                                                                                                                                                                                                                                                                                                                                                                                                                                                                                                                                                                                                                                                                                                                                                                                                                                                                                                                                                                                                                                                                                                                                                                                                                                                                                                                                                                                                                                                                                                                                                                                                                                                                                                                                                                                                                                                                                                                                                                                                                                                                                                                                                                                                                                                                                                |         |  |  |  |  |  |  |  |      |  |   |     |     |     |     |     |     |   |       |   |   |   |   |   |   |   |  |    |   |   |   |   |   |   |   |  |   |   |   |   |   |   |   |   |  |   |   |   |   |   |   |   |   |  |   |   |   |   |   |   |   |   |  |   |   |   |   |   |   |   |   |  |   |   |   |   |   |   |   |   |  |   |   |   |   |   |   |   |   |  |   |   |   |   |   |   |   |   |  |   |   |   |   |   |   |   |   |  |   |   |   |   |   |   |   |   |  |   |   |   |   |   |   |   |   |  |   |   |   |   |   |   |   |   |   |       |   |   |   |   |   |   |   |  |     |   |   |   |   |   |   |   |  |    |   |   |   |   |   |   |   |  |    |   |   |   |   |   |   |   |  |    |   |   |   |   |   |   |   |  |    |   |   |   |   |   |   |   |  |    |   |   |   |   |   |   |   |  |   |   |   |   |   |   |   |   |  |   |   |   |   |   |   |   |   |  |   |   |   |   |   |   |   |   |  |   |   |   |   |   |   |   |   |  |   |   |   |   |   |   |   |   |  |   |   |   |   |   |   |   |   |  |   |   |   |   |   |   |   |   |  |   |   |   |   |   |   |   |   |  |   |   |   |   |   |   |   |   |  |   |   |   |   |   |   |   |   |  |   |   |   |   |   |   |   |   |  |   |   |   |   |   |   |   |   |   |     |   |   |   |   |   |   |   |  |   |   |   |   |   |   |   |   |                                                                                                                                                                                                                                                                                                                                                                                                                                                                                                                                                                                                                                                                                                                                                                                                                                                                                                                                                                                                                                                                                                                                                                                                                                                                                                                                                                                                                                                                                                                                                                                                                                                                                                                                                                                                                                                                                                                                                                                                                                                                                                                                                                                                                                                                                                                                                                                                                                                                                                                                                                                                                                                                                                                                                                                                                                                                                                                                                                                                                                                                                                                                                                                                                                                                                                                                                                                                                                                                                                                                                                                                                                                                                                                                                                  |         |  |  |  |  |  |  |  |      |  |   |     |     |     |     |     |     |       |       |   |   |   |   |   |   |   |  |     |   |   |   |   |   |   |   |  |     |   |   |   |   |   |   |   |  |     |   |   |   |   |   |   |   |  |    |   |   |   |   |   |   |   |  |    |   |   |   |   |   |   |   |  |    |   |   |   |   |   |   |   |  |    |   |   |   |   |   |   |   |  |    |   |   |   |   |   |   |   |  |    |   |   |   |   |   |   |   |  |   |   |   |   |   |   |   |   |  |   |   |   |   |   |   |   |   |  |   |   |   |   |   |   |   |   |  |   |   |   |   |   |   |   |   |  |   |   |   |   |   |   |   |   |  |   |   |   |   |   |   |   |   |  |   |   |   |   |   |   |   |   |  |   |   |   |   |   |   |   |   |  |   |   |   |   |   |   |   |   |  |   |   |   |   |   |   |   |   |  |   |   |   |   |   |   |   |   |  |   |   |   |   |   |   |   |   |  |   |   |   |   |   |   |   |   |  |   |   |   |   |   |   |   |   |  |   |   |   |   |   |   |   |   |  |   |   |   |   |   |   |   |   |  |   |   |   |   |   |   |   |   |  |   |   |   |   |   |   |   |   |  |   |   |   |   |   |   |   |   |  |   |   |   |   |   |   |   |   |  |   |   |   |   |   |   |   |   |  |   |   |   |   |   |   |   |   |  |   |   |   |   |   |   |   |   |  |   |   |   |   |   |   |   |   |  |   |   |   |   |   |   |   |   |
|         | 1                                                                                                                                                                                                                                                                                                                                                                                                                                                                                                                                                                                                                                                                                                                                                                                                                                                                                                                                                                                                                                                                                                                                                                                                                                                                                                                                                                                                                                                                                                        | A            | Y   | A   | Y   | Q   | E   | A   |    |      |     |     |     |     |     |     |     |     |   |       |   |   |   |   |   |   |   |   |     |   |   |                                                                                                                                                                                                                                                                                                                                                                                                                                                                                                                                                                                                                                                                                |         |   |   |   |  |   |    |     |     |     |     |   |   |   |   |    |   |   |   |   |    |   |   |   |   |    |   |   |   |   |   |   |   |   |   |   |   |   |   |   |   |   |   |   |   |   |   |   |   |   |   |   |   |   |   |   |   |   |  |   |   |   |   |   |   |   |   |   |   |   |   |   |   |   |   |   |  |   |   |   |   |   |   |   |   |  |   |   |   |   |   |   |   |   |  |   |   |   |   |   |   |   |   |                                                                                                                                                                                                                                                                                                                                                                                                                                                                                                                                                                                                                                                                                                                                                                                                                                                                                                                                                                                                                                                                                                                                                                                                                                                                                                                                                                                                                                                                                                                                                                                                                                                                                                                                                                                                                                                                                                                                                                                                                                                                                                                                                                                                                                                                                                                                                                                                                                                                                                                                                                                                                                                                                                                                                                                                                                                                                                                                                                                                                                                                                                                                                                                                                                                                                                                                                                                                                                                                                                                                                                                                                                                                |         |  |  |  |  |  |  |  |      |  |   |     |     |     |     |     |     |   |       |   |   |   |   |   |   |   |  |    |   |   |   |   |   |   |   |  |   |   |   |   |   |   |   |   |  |   |   |   |   |   |   |   |   |  |   |   |   |   |   |   |   |   |  |   |   |   |   |   |   |   |   |  |   |   |   |   |   |   |   |   |  |   |   |   |   |   |   |   |   |  |   |   |   |   |   |   |   |   |  |   |   |   |   |   |   |   |   |  |   |   |   |   |   |   |   |   |  |   |   |   |   |   |   |   |   |  |   |   |   |   |   |   |   |   |   |       |   |   |   |   |   |   |   |  |     |   |   |   |   |   |   |   |  |    |   |   |   |   |   |   |   |  |    |   |   |   |   |   |   |   |  |    |   |   |   |   |   |   |   |  |    |   |   |   |   |   |   |   |  |    |   |   |   |   |   |   |   |  |   |   |   |   |   |   |   |   |  |   |   |   |   |   |   |   |   |  |   |   |   |   |   |   |   |   |  |   |   |   |   |   |   |   |   |  |   |   |   |   |   |   |   |   |  |   |   |   |   |   |   |   |   |  |   |   |   |   |   |   |   |   |  |   |   |   |   |   |   |   |   |  |   |   |   |   |   |   |   |   |  |   |   |   |   |   |   |   |   |  |   |   |   |   |   |   |   |   |  |   |   |   |   |   |   |   |   |   |     |   |   |   |   |   |   |   |  |   |   |   |   |   |   |   |   |                                                                                                                                                                                                                                                                                                                                                                                                                                                                                                                                                                                                                                                                                                                                                                                                                                                                                                                                                                                                                                                                                                                                                                                                                                                                                                                                                                                                                                                                                                                                                                                                                                                                                                                                                                                                                                                                                                                                                                                                                                                                                                                                                                                                                                                                                                                                                                                                                                                                                                                                                                                                                                                                                                                                                                                                                                                                                                                                                                                                                                                                                                                                                                                                                                                                                                                                                                                                                                                                                                                                                                                                                                                                                                                                                                  |         |  |  |  |  |  |  |  |      |  |   |     |     |     |     |     |     |       |       |   |   |   |   |   |   |   |  |     |   |   |   |   |   |   |   |  |     |   |   |   |   |   |   |   |  |     |   |   |   |   |   |   |   |  |    |   |   |   |   |   |   |   |  |    |   |   |   |   |   |   |   |  |    |   |   |   |   |   |   |   |  |    |   |   |   |   |   |   |   |  |    |   |   |   |   |   |   |   |  |    |   |   |   |   |   |   |   |  |   |   |   |   |   |   |   |   |  |   |   |   |   |   |   |   |   |  |   |   |   |   |   |   |   |   |  |   |   |   |   |   |   |   |   |  |   |   |   |   |   |   |   |   |  |   |   |   |   |   |   |   |   |  |   |   |   |   |   |   |   |   |  |   |   |   |   |   |   |   |   |  |   |   |   |   |   |   |   |   |  |   |   |   |   |   |   |   |   |  |   |   |   |   |   |   |   |   |  |   |   |   |   |   |   |   |   |  |   |   |   |   |   |   |   |   |  |   |   |   |   |   |   |   |   |  |   |   |   |   |   |   |   |   |  |   |   |   |   |   |   |   |   |  |   |   |   |   |   |   |   |   |  |   |   |   |   |   |   |   |   |  |   |   |   |   |   |   |   |   |  |   |   |   |   |   |   |   |   |  |   |   |   |   |   |   |   |   |  |   |   |   |   |   |   |   |   |  |   |   |   |   |   |   |   |   |  |   |   |   |   |   |   |   |   |  |   |   |   |   |   |   |   |   |
|         | 1                                                                                                                                                                                                                                                                                                                                                                                                                                                                                                                                                                                                                                                                                                                                                                                                                                                                                                                                                                                                                                                                                                                                                                                                                                                                                                                                                                                                                                                                                                        | A            | Y   | A   | Y   | Q   | E   | T   |    |      |     |     |     |     |     |     |     |     |   |       |   |   |   |   |   |   |   |   |     |   |   |                                                                                                                                                                                                                                                                                                                                                                                                                                                                                                                                                                                                                                                                                |         |   |   |   |  |   |    |     |     |     |     |   |   |   |   |    |   |   |   |   |    |   |   |   |   |    |   |   |   |   |   |   |   |   |   |   |   |   |   |   |   |   |   |   |   |   |   |   |   |   |   |   |   |   |   |   |   |   |  |   |   |   |   |   |   |   |   |   |   |   |   |   |   |   |   |   |  |   |   |   |   |   |   |   |   |  |   |   |   |   |   |   |   |   |  |   |   |   |   |   |   |   |   |                                                                                                                                                                                                                                                                                                                                                                                                                                                                                                                                                                                                                                                                                                                                                                                                                                                                                                                                                                                                                                                                                                                                                                                                                                                                                                                                                                                                                                                                                                                                                                                                                                                                                                                                                                                                                                                                                                                                                                                                                                                                                                                                                                                                                                                                                                                                                                                                                                                                                                                                                                                                                                                                                                                                                                                                                                                                                                                                                                                                                                                                                                                                                                                                                                                                                                                                                                                                                                                                                                                                                                                                                                                                |         |  |  |  |  |  |  |  |      |  |   |     |     |     |     |     |     |   |       |   |   |   |   |   |   |   |  |    |   |   |   |   |   |   |   |  |   |   |   |   |   |   |   |   |  |   |   |   |   |   |   |   |   |  |   |   |   |   |   |   |   |   |  |   |   |   |   |   |   |   |   |  |   |   |   |   |   |   |   |   |  |   |   |   |   |   |   |   |   |  |   |   |   |   |   |   |   |   |  |   |   |   |   |   |   |   |   |  |   |   |   |   |   |   |   |   |  |   |   |   |   |   |   |   |   |  |   |   |   |   |   |   |   |   |   |       |   |   |   |   |   |   |   |  |     |   |   |   |   |   |   |   |  |    |   |   |   |   |   |   |   |  |    |   |   |   |   |   |   |   |  |    |   |   |   |   |   |   |   |  |    |   |   |   |   |   |   |   |  |    |   |   |   |   |   |   |   |  |   |   |   |   |   |   |   |   |  |   |   |   |   |   |   |   |   |  |   |   |   |   |   |   |   |   |  |   |   |   |   |   |   |   |   |  |   |   |   |   |   |   |   |   |  |   |   |   |   |   |   |   |   |  |   |   |   |   |   |   |   |   |  |   |   |   |   |   |   |   |   |  |   |   |   |   |   |   |   |   |  |   |   |   |   |   |   |   |   |  |   |   |   |   |   |   |   |   |  |   |   |   |   |   |   |   |   |   |     |   |   |   |   |   |   |   |  |   |   |   |   |   |   |   |   |                                                                                                                                                                                                                                                                                                                                                                                                                                                                                                                                                                                                                                                                                                                                                                                                                                                                                                                                                                                                                                                                                                                                                                                                                                                                                                                                                                                                                                                                                                                                                                                                                                                                                                                                                                                                                                                                                                                                                                                                                                                                                                                                                                                                                                                                                                                                                                                                                                                                                                                                                                                                                                                                                                                                                                                                                                                                                                                                                                                                                                                                                                                                                                                                                                                                                                                                                                                                                                                                                                                                                                                                                                                                                                                                                                  |         |  |  |  |  |  |  |  |      |  |   |     |     |     |     |     |     |       |       |   |   |   |   |   |   |   |  |     |   |   |   |   |   |   |   |  |     |   |   |   |   |   |   |   |  |     |   |   |   |   |   |   |   |  |    |   |   |   |   |   |   |   |  |    |   |   |   |   |   |   |   |  |    |   |   |   |   |   |   |   |  |    |   |   |   |   |   |   |   |  |    |   |   |   |   |   |   |   |  |    |   |   |   |   |   |   |   |  |   |   |   |   |   |   |   |   |  |   |   |   |   |   |   |   |   |  |   |   |   |   |   |   |   |   |  |   |   |   |   |   |   |   |   |  |   |   |   |   |   |   |   |   |  |   |   |   |   |   |   |   |   |  |   |   |   |   |   |   |   |   |  |   |   |   |   |   |   |   |   |  |   |   |   |   |   |   |   |   |  |   |   |   |   |   |   |   |   |  |   |   |   |   |   |   |   |   |  |   |   |   |   |   |   |   |   |  |   |   |   |   |   |   |   |   |  |   |   |   |   |   |   |   |   |  |   |   |   |   |   |   |   |   |  |   |   |   |   |   |   |   |   |  |   |   |   |   |   |   |   |   |  |   |   |   |   |   |   |   |   |  |   |   |   |   |   |   |   |   |  |   |   |   |   |   |   |   |   |  |   |   |   |   |   |   |   |   |  |   |   |   |   |   |   |   |   |  |   |   |   |   |   |   |   |   |  |   |   |   |   |   |   |   |   |  |   |   |   |   |   |   |   |   |
|         | 1                                                                                                                                                                                                                                                                                                                                                                                                                                                                                                                                                                                                                                                                                                                                                                                                                                                                                                                                                                                                                                                                                                                                                                                                                                                                                                                                                                                                                                                                                                        | F            | F   | A   | Y   | Q   | E   | T   |    |      |     |     |     |     |     |     |     |     |   |       |   |   |   |   |   |   |   |   |     |   |   |                                                                                                                                                                                                                                                                                                                                                                                                                                                                                                                                                                                                                                                                                |         |   |   |   |  |   |    |     |     |     |     |   |   |   |   |    |   |   |   |   |    |   |   |   |   |    |   |   |   |   |   |   |   |   |   |   |   |   |   |   |   |   |   |   |   |   |   |   |   |   |   |   |   |   |   |   |   |   |  |   |   |   |   |   |   |   |   |   |   |   |   |   |   |   |   |   |  |   |   |   |   |   |   |   |   |  |   |   |   |   |   |   |   |   |  |   |   |   |   |   |   |   |   |                                                                                                                                                                                                                                                                                                                                                                                                                                                                                                                                                                                                                                                                                                                                                                                                                                                                                                                                                                                                                                                                                                                                                                                                                                                                                                                                                                                                                                                                                                                                                                                                                                                                                                                                                                                                                                                                                                                                                                                                                                                                                                                                                                                                                                                                                                                                                                                                                                                                                                                                                                                                                                                                                                                                                                                                                                                                                                                                                                                                                                                                                                                                                                                                                                                                                                                                                                                                                                                                                                                                                                                                                                                                |         |  |  |  |  |  |  |  |      |  |   |     |     |     |     |     |     |   |       |   |   |   |   |   |   |   |  |    |   |   |   |   |   |   |   |  |   |   |   |   |   |   |   |   |  |   |   |   |   |   |   |   |   |  |   |   |   |   |   |   |   |   |  |   |   |   |   |   |   |   |   |  |   |   |   |   |   |   |   |   |  |   |   |   |   |   |   |   |   |  |   |   |   |   |   |   |   |   |  |   |   |   |   |   |   |   |   |  |   |   |   |   |   |   |   |   |  |   |   |   |   |   |   |   |   |  |   |   |   |   |   |   |   |   |   |       |   |   |   |   |   |   |   |  |     |   |   |   |   |   |   |   |  |    |   |   |   |   |   |   |   |  |    |   |   |   |   |   |   |   |  |    |   |   |   |   |   |   |   |  |    |   |   |   |   |   |   |   |  |    |   |   |   |   |   |   |   |  |   |   |   |   |   |   |   |   |  |   |   |   |   |   |   |   |   |  |   |   |   |   |   |   |   |   |  |   |   |   |   |   |   |   |   |  |   |   |   |   |   |   |   |   |  |   |   |   |   |   |   |   |   |  |   |   |   |   |   |   |   |   |  |   |   |   |   |   |   |   |   |  |   |   |   |   |   |   |   |   |  |   |   |   |   |   |   |   |   |  |   |   |   |   |   |   |   |   |  |   |   |   |   |   |   |   |   |   |     |   |   |   |   |   |   |   |  |   |   |   |   |   |   |   |   |                                                                                                                                                                                                                                                                                                                                                                                                                                                                                                                                                                                                                                                                                                                                                                                                                                                                                                                                                                                                                                                                                                                                                                                                                                                                                                                                                                                                                                                                                                                                                                                                                                                                                                                                                                                                                                                                                                                                                                                                                                                                                                                                                                                                                                                                                                                                                                                                                                                                                                                                                                                                                                                                                                                                                                                                                                                                                                                                                                                                                                                                                                                                                                                                                                                                                                                                                                                                                                                                                                                                                                                                                                                                                                                                                                  |         |  |  |  |  |  |  |  |      |  |   |     |     |     |     |     |     |       |       |   |   |   |   |   |   |   |  |     |   |   |   |   |   |   |   |  |     |   |   |   |   |   |   |   |  |     |   |   |   |   |   |   |   |  |    |   |   |   |   |   |   |   |  |    |   |   |   |   |   |   |   |  |    |   |   |   |   |   |   |   |  |    |   |   |   |   |   |   |   |  |    |   |   |   |   |   |   |   |  |    |   |   |   |   |   |   |   |  |   |   |   |   |   |   |   |   |  |   |   |   |   |   |   |   |   |  |   |   |   |   |   |   |   |   |  |   |   |   |   |   |   |   |   |  |   |   |   |   |   |   |   |   |  |   |   |   |   |   |   |   |   |  |   |   |   |   |   |   |   |   |  |   |   |   |   |   |   |   |   |  |   |   |   |   |   |   |   |   |  |   |   |   |   |   |   |   |   |  |   |   |   |   |   |   |   |   |  |   |   |   |   |   |   |   |   |  |   |   |   |   |   |   |   |   |  |   |   |   |   |   |   |   |   |  |   |   |   |   |   |   |   |   |  |   |   |   |   |   |   |   |   |  |   |   |   |   |   |   |   |   |  |   |   |   |   |   |   |   |   |  |   |   |   |   |   |   |   |   |  |   |   |   |   |   |   |   |   |  |   |   |   |   |   |   |   |   |  |   |   |   |   |   |   |   |   |  |   |   |   |   |   |   |   |   |  |   |   |   |   |   |   |   |   |  |   |   |   |   |   |   |   |   |
| b       | N 392                                                                                                                                                                                                                                                                                                                                                                                                                                                                                                                                                                                                                                                                                                                                                                                                                                                                                                                                                                                                                                                                                                                                                                                                                                                                                                                                                                                                                                                                                                    | A            | F   | A   | Y   | Q   | D   | T   |    |      |     |     |     |     |     |     |     |     |   |       |   |   |   |   |   |   |   |   |     |   |   |                                                                                                                                                                                                                                                                                                                                                                                                                                                                                                                                                                                                                                                                                |         |   |   |   |  |   |    |     |     |     |     |   |   |   |   |    |   |   |   |   |    |   |   |   |   |    |   |   |   |   |   |   |   |   |   |   |   |   |   |   |   |   |   |   |   |   |   |   |   |   |   |   |   |   |   |   |   |   |  |   |   |   |   |   |   |   |   |   |   |   |   |   |   |   |   |   |  |   |   |   |   |   |   |   |   |  |   |   |   |   |   |   |   |   |  |   |   |   |   |   |   |   |   |                                                                                                                                                                                                                                                                                                                                                                                                                                                                                                                                                                                                                                                                                                                                                                                                                                                                                                                                                                                                                                                                                                                                                                                                                                                                                                                                                                                                                                                                                                                                                                                                                                                                                                                                                                                                                                                                                                                                                                                                                                                                                                                                                                                                                                                                                                                                                                                                                                                                                                                                                                                                                                                                                                                                                                                                                                                                                                                                                                                                                                                                                                                                                                                                                                                                                                                                                                                                                                                                                                                                                                                                                                                                |         |  |  |  |  |  |  |  |      |  |   |     |     |     |     |     |     |   |       |   |   |   |   |   |   |   |  |    |   |   |   |   |   |   |   |  |   |   |   |   |   |   |   |   |  |   |   |   |   |   |   |   |   |  |   |   |   |   |   |   |   |   |  |   |   |   |   |   |   |   |   |  |   |   |   |   |   |   |   |   |  |   |   |   |   |   |   |   |   |  |   |   |   |   |   |   |   |   |  |   |   |   |   |   |   |   |   |  |   |   |   |   |   |   |   |   |  |   |   |   |   |   |   |   |   |  |   |   |   |   |   |   |   |   |   |       |   |   |   |   |   |   |   |  |     |   |   |   |   |   |   |   |  |    |   |   |   |   |   |   |   |  |    |   |   |   |   |   |   |   |  |    |   |   |   |   |   |   |   |  |    |   |   |   |   |   |   |   |  |    |   |   |   |   |   |   |   |  |   |   |   |   |   |   |   |   |  |   |   |   |   |   |   |   |   |  |   |   |   |   |   |   |   |   |  |   |   |   |   |   |   |   |   |  |   |   |   |   |   |   |   |   |  |   |   |   |   |   |   |   |   |  |   |   |   |   |   |   |   |   |  |   |   |   |   |   |   |   |   |  |   |   |   |   |   |   |   |   |  |   |   |   |   |   |   |   |   |  |   |   |   |   |   |   |   |   |  |   |   |   |   |   |   |   |   |   |     |   |   |   |   |   |   |   |  |   |   |   |   |   |   |   |   |                                                                                                                                                                                                                                                                                                                                                                                                                                                                                                                                                                                                                                                                                                                                                                                                                                                                                                                                                                                                                                                                                                                                                                                                                                                                                                                                                                                                                                                                                                                                                                                                                                                                                                                                                                                                                                                                                                                                                                                                                                                                                                                                                                                                                                                                                                                                                                                                                                                                                                                                                                                                                                                                                                                                                                                                                                                                                                                                                                                                                                                                                                                                                                                                                                                                                                                                                                                                                                                                                                                                                                                                                                                                                                                                                                  |         |  |  |  |  |  |  |  |      |  |   |     |     |     |     |     |     |       |       |   |   |   |   |   |   |   |  |     |   |   |   |   |   |   |   |  |     |   |   |   |   |   |   |   |  |     |   |   |   |   |   |   |   |  |    |   |   |   |   |   |   |   |  |    |   |   |   |   |   |   |   |  |    |   |   |   |   |   |   |   |  |    |   |   |   |   |   |   |   |  |    |   |   |   |   |   |   |   |  |    |   |   |   |   |   |   |   |  |   |   |   |   |   |   |   |   |  |   |   |   |   |   |   |   |   |  |   |   |   |   |   |   |   |   |  |   |   |   |   |   |   |   |   |  |   |   |   |   |   |   |   |   |  |   |   |   |   |   |   |   |   |  |   |   |   |   |   |   |   |   |  |   |   |   |   |   |   |   |   |  |   |   |   |   |   |   |   |   |  |   |   |   |   |   |   |   |   |  |   |   |   |   |   |   |   |   |  |   |   |   |   |   |   |   |   |  |   |   |   |   |   |   |   |   |  |   |   |   |   |   |   |   |   |  |   |   |   |   |   |   |   |   |  |   |   |   |   |   |   |   |   |  |   |   |   |   |   |   |   |   |  |   |   |   |   |   |   |   |   |  |   |   |   |   |   |   |   |   |  |   |   |   |   |   |   |   |   |  |   |   |   |   |   |   |   |   |  |   |   |   |   |   |   |   |   |  |   |   |   |   |   |   |   |   |  |   |   |   |   |   |   |   |   |  |   |   |   |   |   |   |   |   |
|         | 154                                                                                                                                                                                                                                                                                                                                                                                                                                                                                                                                                                                                                                                                                                                                                                                                                                                                                                                                                                                                                                                                                                                                                                                                                                                                                                                                                                                                                                                                                                      | A            | Y   | A   | I   | Q   | D   | A   |    |      |     |     |     |     |     |     |     |     |   |       |   |   |   |   |   |   |   |   |     |   |   |                                                                                                                                                                                                                                                                                                                                                                                                                                                                                                                                                                                                                                                                                |         |   |   |   |  |   |    |     |     |     |     |   |   |   |   |    |   |   |   |   |    |   |   |   |   |    |   |   |   |   |   |   |   |   |   |   |   |   |   |   |   |   |   |   |   |   |   |   |   |   |   |   |   |   |   |   |   |   |  |   |   |   |   |   |   |   |   |   |   |   |   |   |   |   |   |   |  |   |   |   |   |   |   |   |   |  |   |   |   |   |   |   |   |   |  |   |   |   |   |   |   |   |   |                                                                                                                                                                                                                                                                                                                                                                                                                                                                                                                                                                                                                                                                                                                                                                                                                                                                                                                                                                                                                                                                                                                                                                                                                                                                                                                                                                                                                                                                                                                                                                                                                                                                                                                                                                                                                                                                                                                                                                                                                                                                                                                                                                                                                                                                                                                                                                                                                                                                                                                                                                                                                                                                                                                                                                                                                                                                                                                                                                                                                                                                                                                                                                                                                                                                                                                                                                                                                                                                                                                                                                                                                                                                |         |  |  |  |  |  |  |  |      |  |   |     |     |     |     |     |     |   |       |   |   |   |   |   |   |   |  |    |   |   |   |   |   |   |   |  |   |   |   |   |   |   |   |   |  |   |   |   |   |   |   |   |   |  |   |   |   |   |   |   |   |   |  |   |   |   |   |   |   |   |   |  |   |   |   |   |   |   |   |   |  |   |   |   |   |   |   |   |   |  |   |   |   |   |   |   |   |   |  |   |   |   |   |   |   |   |   |  |   |   |   |   |   |   |   |   |  |   |   |   |   |   |   |   |   |  |   |   |   |   |   |   |   |   |   |       |   |   |   |   |   |   |   |  |     |   |   |   |   |   |   |   |  |    |   |   |   |   |   |   |   |  |    |   |   |   |   |   |   |   |  |    |   |   |   |   |   |   |   |  |    |   |   |   |   |   |   |   |  |    |   |   |   |   |   |   |   |  |   |   |   |   |   |   |   |   |  |   |   |   |   |   |   |   |   |  |   |   |   |   |   |   |   |   |  |   |   |   |   |   |   |   |   |  |   |   |   |   |   |   |   |   |  |   |   |   |   |   |   |   |   |  |   |   |   |   |   |   |   |   |  |   |   |   |   |   |   |   |   |  |   |   |   |   |   |   |   |   |  |   |   |   |   |   |   |   |   |  |   |   |   |   |   |   |   |   |  |   |   |   |   |   |   |   |   |   |     |   |   |   |   |   |   |   |  |   |   |   |   |   |   |   |   |                                                                                                                                                                                                                                                                                                                                                                                                                                                                                                                                                                                                                                                                                                                                                                                                                                                                                                                                                                                                                                                                                                                                                                                                                                                                                                                                                                                                                                                                                                                                                                                                                                                                                                                                                                                                                                                                                                                                                                                                                                                                                                                                                                                                                                                                                                                                                                                                                                                                                                                                                                                                                                                                                                                                                                                                                                                                                                                                                                                                                                                                                                                                                                                                                                                                                                                                                                                                                                                                                                                                                                                                                                                                                                                                                                  |         |  |  |  |  |  |  |  |      |  |   |     |     |     |     |     |     |       |       |   |   |   |   |   |   |   |  |     |   |   |   |   |   |   |   |  |     |   |   |   |   |   |   |   |  |     |   |   |   |   |   |   |   |  |    |   |   |   |   |   |   |   |  |    |   |   |   |   |   |   |   |  |    |   |   |   |   |   |   |   |  |    |   |   |   |   |   |   |   |  |    |   |   |   |   |   |   |   |  |    |   |   |   |   |   |   |   |  |   |   |   |   |   |   |   |   |  |   |   |   |   |   |   |   |   |  |   |   |   |   |   |   |   |   |  |   |   |   |   |   |   |   |   |  |   |   |   |   |   |   |   |   |  |   |   |   |   |   |   |   |   |  |   |   |   |   |   |   |   |   |  |   |   |   |   |   |   |   |   |  |   |   |   |   |   |   |   |   |  |   |   |   |   |   |   |   |   |  |   |   |   |   |   |   |   |   |  |   |   |   |   |   |   |   |   |  |   |   |   |   |   |   |   |   |  |   |   |   |   |   |   |   |   |  |   |   |   |   |   |   |   |   |  |   |   |   |   |   |   |   |   |  |   |   |   |   |   |   |   |   |  |   |   |   |   |   |   |   |   |  |   |   |   |   |   |   |   |   |  |   |   |   |   |   |   |   |   |  |   |   |   |   |   |   |   |   |  |   |   |   |   |   |   |   |   |  |   |   |   |   |   |   |   |   |  |   |   |   |   |   |   |   |   |  |   |   |   |   |   |   |   |   |
|         | 48                                                                                                                                                                                                                                                                                                                                                                                                                                                                                                                                                                                                                                                                                                                                                                                                                                                                                                                                                                                                                                                                                                                                                                                                                                                                                                                                                                                                                                                                                                       | A            | Y   | A   | I   | Q   | D   | T   |    |      |     |     |     |     |     |     |     |     |   |       |   |   |   |   |   |   |   |   |     |   |   |                                                                                                                                                                                                                                                                                                                                                                                                                                                                                                                                                                                                                                                                                |         |   |   |   |  |   |    |     |     |     |     |   |   |   |   |    |   |   |   |   |    |   |   |   |   |    |   |   |   |   |   |   |   |   |   |   |   |   |   |   |   |   |   |   |   |   |   |   |   |   |   |   |   |   |   |   |   |   |  |   |   |   |   |   |   |   |   |   |   |   |   |   |   |   |   |   |  |   |   |   |   |   |   |   |   |  |   |   |   |   |   |   |   |   |  |   |   |   |   |   |   |   |   |                                                                                                                                                                                                                                                                                                                                                                                                                                                                                                                                                                                                                                                                                                                                                                                                                                                                                                                                                                                                                                                                                                                                                                                                                                                                                                                                                                                                                                                                                                                                                                                                                                                                                                                                                                                                                                                                                                                                                                                                                                                                                                                                                                                                                                                                                                                                                                                                                                                                                                                                                                                                                                                                                                                                                                                                                                                                                                                                                                                                                                                                                                                                                                                                                                                                                                                                                                                                                                                                                                                                                                                                                                                                |         |  |  |  |  |  |  |  |      |  |   |     |     |     |     |     |     |   |       |   |   |   |   |   |   |   |  |    |   |   |   |   |   |   |   |  |   |   |   |   |   |   |   |   |  |   |   |   |   |   |   |   |   |  |   |   |   |   |   |   |   |   |  |   |   |   |   |   |   |   |   |  |   |   |   |   |   |   |   |   |  |   |   |   |   |   |   |   |   |  |   |   |   |   |   |   |   |   |  |   |   |   |   |   |   |   |   |  |   |   |   |   |   |   |   |   |  |   |   |   |   |   |   |   |   |  |   |   |   |   |   |   |   |   |   |       |   |   |   |   |   |   |   |  |     |   |   |   |   |   |   |   |  |    |   |   |   |   |   |   |   |  |    |   |   |   |   |   |   |   |  |    |   |   |   |   |   |   |   |  |    |   |   |   |   |   |   |   |  |    |   |   |   |   |   |   |   |  |   |   |   |   |   |   |   |   |  |   |   |   |   |   |   |   |   |  |   |   |   |   |   |   |   |   |  |   |   |   |   |   |   |   |   |  |   |   |   |   |   |   |   |   |  |   |   |   |   |   |   |   |   |  |   |   |   |   |   |   |   |   |  |   |   |   |   |   |   |   |   |  |   |   |   |   |   |   |   |   |  |   |   |   |   |   |   |   |   |  |   |   |   |   |   |   |   |   |  |   |   |   |   |   |   |   |   |   |     |   |   |   |   |   |   |   |  |   |   |   |   |   |   |   |   |                                                                                                                                                                                                                                                                                                                                                                                                                                                                                                                                                                                                                                                                                                                                                                                                                                                                                                                                                                                                                                                                                                                                                                                                                                                                                                                                                                                                                                                                                                                                                                                                                                                                                                                                                                                                                                                                                                                                                                                                                                                                                                                                                                                                                                                                                                                                                                                                                                                                                                                                                                                                                                                                                                                                                                                                                                                                                                                                                                                                                                                                                                                                                                                                                                                                                                                                                                                                                                                                                                                                                                                                                                                                                                                                                                  |         |  |  |  |  |  |  |  |      |  |   |     |     |     |     |     |     |       |       |   |   |   |   |   |   |   |  |     |   |   |   |   |   |   |   |  |     |   |   |   |   |   |   |   |  |     |   |   |   |   |   |   |   |  |    |   |   |   |   |   |   |   |  |    |   |   |   |   |   |   |   |  |    |   |   |   |   |   |   |   |  |    |   |   |   |   |   |   |   |  |    |   |   |   |   |   |   |   |  |    |   |   |   |   |   |   |   |  |   |   |   |   |   |   |   |   |  |   |   |   |   |   |   |   |   |  |   |   |   |   |   |   |   |   |  |   |   |   |   |   |   |   |   |  |   |   |   |   |   |   |   |   |  |   |   |   |   |   |   |   |   |  |   |   |   |   |   |   |   |   |  |   |   |   |   |   |   |   |   |  |   |   |   |   |   |   |   |   |  |   |   |   |   |   |   |   |   |  |   |   |   |   |   |   |   |   |  |   |   |   |   |   |   |   |   |  |   |   |   |   |   |   |   |   |  |   |   |   |   |   |   |   |   |  |   |   |   |   |   |   |   |   |  |   |   |   |   |   |   |   |   |  |   |   |   |   |   |   |   |   |  |   |   |   |   |   |   |   |   |  |   |   |   |   |   |   |   |   |  |   |   |   |   |   |   |   |   |  |   |   |   |   |   |   |   |   |  |   |   |   |   |   |   |   |   |  |   |   |   |   |   |   |   |   |  |   |   |   |   |   |   |   |   |  |   |   |   |   |   |   |   |   |
|         | 44                                                                                                                                                                                                                                                                                                                                                                                                                                                                                                                                                                                                                                                                                                                                                                                                                                                                                                                                                                                                                                                                                                                                                                                                                                                                                                                                                                                                                                                                                                       | G            | Y   | A   | Y   | Q   | D   | T   |    |      |     |     |     |     |     |     |     |     |   |       |   |   |   |   |   |   |   |   |     |   |   |                                                                                                                                                                                                                                                                                                                                                                                                                                                                                                                                                                                                                                                                                |         |   |   |   |  |   |    |     |     |     |     |   |   |   |   |    |   |   |   |   |    |   |   |   |   |    |   |   |   |   |   |   |   |   |   |   |   |   |   |   |   |   |   |   |   |   |   |   |   |   |   |   |   |   |   |   |   |   |  |   |   |   |   |   |   |   |   |   |   |   |   |   |   |   |   |   |  |   |   |   |   |   |   |   |   |  |   |   |   |   |   |   |   |   |  |   |   |   |   |   |   |   |   |                                                                                                                                                                                                                                                                                                                                                                                                                                                                                                                                                                                                                                                                                                                                                                                                                                                                                                                                                                                                                                                                                                                                                                                                                                                                                                                                                                                                                                                                                                                                                                                                                                                                                                                                                                                                                                                                                                                                                                                                                                                                                                                                                                                                                                                                                                                                                                                                                                                                                                                                                                                                                                                                                                                                                                                                                                                                                                                                                                                                                                                                                                                                                                                                                                                                                                                                                                                                                                                                                                                                                                                                                                                                |         |  |  |  |  |  |  |  |      |  |   |     |     |     |     |     |     |   |       |   |   |   |   |   |   |   |  |    |   |   |   |   |   |   |   |  |   |   |   |   |   |   |   |   |  |   |   |   |   |   |   |   |   |  |   |   |   |   |   |   |   |   |  |   |   |   |   |   |   |   |   |  |   |   |   |   |   |   |   |   |  |   |   |   |   |   |   |   |   |  |   |   |   |   |   |   |   |   |  |   |   |   |   |   |   |   |   |  |   |   |   |   |   |   |   |   |  |   |   |   |   |   |   |   |   |  |   |   |   |   |   |   |   |   |   |       |   |   |   |   |   |   |   |  |     |   |   |   |   |   |   |   |  |    |   |   |   |   |   |   |   |  |    |   |   |   |   |   |   |   |  |    |   |   |   |   |   |   |   |  |    |   |   |   |   |   |   |   |  |    |   |   |   |   |   |   |   |  |   |   |   |   |   |   |   |   |  |   |   |   |   |   |   |   |   |  |   |   |   |   |   |   |   |   |  |   |   |   |   |   |   |   |   |  |   |   |   |   |   |   |   |   |  |   |   |   |   |   |   |   |   |  |   |   |   |   |   |   |   |   |  |   |   |   |   |   |   |   |   |  |   |   |   |   |   |   |   |   |  |   |   |   |   |   |   |   |   |  |   |   |   |   |   |   |   |   |  |   |   |   |   |   |   |   |   |   |     |   |   |   |   |   |   |   |  |   |   |   |   |   |   |   |   |                                                                                                                                                                                                                                                                                                                                                                                                                                                                                                                                                                                                                                                                                                                                                                                                                                                                                                                                                                                                                                                                                                                                                                                                                                                                                                                                                                                                                                                                                                                                                                                                                                                                                                                                                                                                                                                                                                                                                                                                                                                                                                                                                                                                                                                                                                                                                                                                                                                                                                                                                                                                                                                                                                                                                                                                                                                                                                                                                                                                                                                                                                                                                                                                                                                                                                                                                                                                                                                                                                                                                                                                                                                                                                                                                                  |         |  |  |  |  |  |  |  |      |  |   |     |     |     |     |     |     |       |       |   |   |   |   |   |   |   |  |     |   |   |   |   |   |   |   |  |     |   |   |   |   |   |   |   |  |     |   |   |   |   |   |   |   |  |    |   |   |   |   |   |   |   |  |    |   |   |   |   |   |   |   |  |    |   |   |   |   |   |   |   |  |    |   |   |   |   |   |   |   |  |    |   |   |   |   |   |   |   |  |    |   |   |   |   |   |   |   |  |   |   |   |   |   |   |   |   |  |   |   |   |   |   |   |   |   |  |   |   |   |   |   |   |   |   |  |   |   |   |   |   |   |   |   |  |   |   |   |   |   |   |   |   |  |   |   |   |   |   |   |   |   |  |   |   |   |   |   |   |   |   |  |   |   |   |   |   |   |   |   |  |   |   |   |   |   |   |   |   |  |   |   |   |   |   |   |   |   |  |   |   |   |   |   |   |   |   |  |   |   |   |   |   |   |   |   |  |   |   |   |   |   |   |   |   |  |   |   |   |   |   |   |   |   |  |   |   |   |   |   |   |   |   |  |   |   |   |   |   |   |   |   |  |   |   |   |   |   |   |   |   |  |   |   |   |   |   |   |   |   |  |   |   |   |   |   |   |   |   |  |   |   |   |   |   |   |   |   |  |   |   |   |   |   |   |   |   |  |   |   |   |   |   |   |   |   |  |   |   |   |   |   |   |   |   |  |   |   |   |   |   |   |   |   |  |   |   |   |   |   |   |   |   |
|         | 23                                                                                                                                                                                                                                                                                                                                                                                                                                                                                                                                                                                                                                                                                                                                                                                                                                                                                                                                                                                                                                                                                                                                                                                                                                                                                                                                                                                                                                                                                                       | A            | Y   | A   | Y   | Q   | D   | T   |    |      |     |     |     |     |     |     |     |     |   |       |   |   |   |   |   |   |   |   |     |   |   |                                                                                                                                                                                                                                                                                                                                                                                                                                                                                                                                                                                                                                                                                |         |   |   |   |  |   |    |     |     |     |     |   |   |   |   |    |   |   |   |   |    |   |   |   |   |    |   |   |   |   |   |   |   |   |   |   |   |   |   |   |   |   |   |   |   |   |   |   |   |   |   |   |   |   |   |   |   |   |  |   |   |   |   |   |   |   |   |   |   |   |   |   |   |   |   |   |  |   |   |   |   |   |   |   |   |  |   |   |   |   |   |   |   |   |  |   |   |   |   |   |   |   |   |                                                                                                                                                                                                                                                                                                                                                                                                                                                                                                                                                                                                                                                                                                                                                                                                                                                                                                                                                                                                                                                                                                                                                                                                                                                                                                                                                                                                                                                                                                                                                                                                                                                                                                                                                                                                                                                                                                                                                                                                                                                                                                                                                                                                                                                                                                                                                                                                                                                                                                                                                                                                                                                                                                                                                                                                                                                                                                                                                                                                                                                                                                                                                                                                                                                                                                                                                                                                                                                                                                                                                                                                                                                                |         |  |  |  |  |  |  |  |      |  |   |     |     |     |     |     |     |   |       |   |   |   |   |   |   |   |  |    |   |   |   |   |   |   |   |  |   |   |   |   |   |   |   |   |  |   |   |   |   |   |   |   |   |  |   |   |   |   |   |   |   |   |  |   |   |   |   |   |   |   |   |  |   |   |   |   |   |   |   |   |  |   |   |   |   |   |   |   |   |  |   |   |   |   |   |   |   |   |  |   |   |   |   |   |   |   |   |  |   |   |   |   |   |   |   |   |  |   |   |   |   |   |   |   |   |  |   |   |   |   |   |   |   |   |   |       |   |   |   |   |   |   |   |  |     |   |   |   |   |   |   |   |  |    |   |   |   |   |   |   |   |  |    |   |   |   |   |   |   |   |  |    |   |   |   |   |   |   |   |  |    |   |   |   |   |   |   |   |  |    |   |   |   |   |   |   |   |  |   |   |   |   |   |   |   |   |  |   |   |   |   |   |   |   |   |  |   |   |   |   |   |   |   |   |  |   |   |   |   |   |   |   |   |  |   |   |   |   |   |   |   |   |  |   |   |   |   |   |   |   |   |  |   |   |   |   |   |   |   |   |  |   |   |   |   |   |   |   |   |  |   |   |   |   |   |   |   |   |  |   |   |   |   |   |   |   |   |  |   |   |   |   |   |   |   |   |  |   |   |   |   |   |   |   |   |   |     |   |   |   |   |   |   |   |  |   |   |   |   |   |   |   |   |                                                                                                                                                                                                                                                                                                                                                                                                                                                                                                                                                                                                                                                                                                                                                                                                                                                                                                                                                                                                                                                                                                                                                                                                                                                                                                                                                                                                                                                                                                                                                                                                                                                                                                                                                                                                                                                                                                                                                                                                                                                                                                                                                                                                                                                                                                                                                                                                                                                                                                                                                                                                                                                                                                                                                                                                                                                                                                                                                                                                                                                                                                                                                                                                                                                                                                                                                                                                                                                                                                                                                                                                                                                                                                                                                                  |         |  |  |  |  |  |  |  |      |  |   |     |     |     |     |     |     |       |       |   |   |   |   |   |   |   |  |     |   |   |   |   |   |   |   |  |     |   |   |   |   |   |   |   |  |     |   |   |   |   |   |   |   |  |    |   |   |   |   |   |   |   |  |    |   |   |   |   |   |   |   |  |    |   |   |   |   |   |   |   |  |    |   |   |   |   |   |   |   |  |    |   |   |   |   |   |   |   |  |    |   |   |   |   |   |   |   |  |   |   |   |   |   |   |   |   |  |   |   |   |   |   |   |   |   |  |   |   |   |   |   |   |   |   |  |   |   |   |   |   |   |   |   |  |   |   |   |   |   |   |   |   |  |   |   |   |   |   |   |   |   |  |   |   |   |   |   |   |   |   |  |   |   |   |   |   |   |   |   |  |   |   |   |   |   |   |   |   |  |   |   |   |   |   |   |   |   |  |   |   |   |   |   |   |   |   |  |   |   |   |   |   |   |   |   |  |   |   |   |   |   |   |   |   |  |   |   |   |   |   |   |   |   |  |   |   |   |   |   |   |   |   |  |   |   |   |   |   |   |   |   |  |   |   |   |   |   |   |   |   |  |   |   |   |   |   |   |   |   |  |   |   |   |   |   |   |   |   |  |   |   |   |   |   |   |   |   |  |   |   |   |   |   |   |   |   |  |   |   |   |   |   |   |   |   |  |   |   |   |   |   |   |   |   |  |   |   |   |   |   |   |   |   |  |   |   |   |   |   |   |   |   |
|         | 21                                                                                                                                                                                                                                                                                                                                                                                                                                                                                                                                                                                                                                                                                                                                                                                                                                                                                                                                                                                                                                                                                                                                                                                                                                                                                                                                                                                                                                                                                                       | A            | F   | S   | Y   | Q   | D   | T   |    |      |     |     |     |     |     |     |     |     |   |       |   |   |   |   |   |   |   |   |     |   |   |                                                                                                                                                                                                                                                                                                                                                                                                                                                                                                                                                                                                                                                                                |         |   |   |   |  |   |    |     |     |     |     |   |   |   |   |    |   |   |   |   |    |   |   |   |   |    |   |   |   |   |   |   |   |   |   |   |   |   |   |   |   |   |   |   |   |   |   |   |   |   |   |   |   |   |   |   |   |   |  |   |   |   |   |   |   |   |   |   |   |   |   |   |   |   |   |   |  |   |   |   |   |   |   |   |   |  |   |   |   |   |   |   |   |   |  |   |   |   |   |   |   |   |   |                                                                                                                                                                                                                                                                                                                                                                                                                                                                                                                                                                                                                                                                                                                                                                                                                                                                                                                                                                                                                                                                                                                                                                                                                                                                                                                                                                                                                                                                                                                                                                                                                                                                                                                                                                                                                                                                                                                                                                                                                                                                                                                                                                                                                                                                                                                                                                                                                                                                                                                                                                                                                                                                                                                                                                                                                                                                                                                                                                                                                                                                                                                                                                                                                                                                                                                                                                                                                                                                                                                                                                                                                                                                |         |  |  |  |  |  |  |  |      |  |   |     |     |     |     |     |     |   |       |   |   |   |   |   |   |   |  |    |   |   |   |   |   |   |   |  |   |   |   |   |   |   |   |   |  |   |   |   |   |   |   |   |   |  |   |   |   |   |   |   |   |   |  |   |   |   |   |   |   |   |   |  |   |   |   |   |   |   |   |   |  |   |   |   |   |   |   |   |   |  |   |   |   |   |   |   |   |   |  |   |   |   |   |   |   |   |   |  |   |   |   |   |   |   |   |   |  |   |   |   |   |   |   |   |   |  |   |   |   |   |   |   |   |   |   |       |   |   |   |   |   |   |   |  |     |   |   |   |   |   |   |   |  |    |   |   |   |   |   |   |   |  |    |   |   |   |   |   |   |   |  |    |   |   |   |   |   |   |   |  |    |   |   |   |   |   |   |   |  |    |   |   |   |   |   |   |   |  |   |   |   |   |   |   |   |   |  |   |   |   |   |   |   |   |   |  |   |   |   |   |   |   |   |   |  |   |   |   |   |   |   |   |   |  |   |   |   |   |   |   |   |   |  |   |   |   |   |   |   |   |   |  |   |   |   |   |   |   |   |   |  |   |   |   |   |   |   |   |   |  |   |   |   |   |   |   |   |   |  |   |   |   |   |   |   |   |   |  |   |   |   |   |   |   |   |   |  |   |   |   |   |   |   |   |   |   |     |   |   |   |   |   |   |   |  |   |   |   |   |   |   |   |   |                                                                                                                                                                                                                                                                                                                                                                                                                                                                                                                                                                                                                                                                                                                                                                                                                                                                                                                                                                                                                                                                                                                                                                                                                                                                                                                                                                                                                                                                                                                                                                                                                                                                                                                                                                                                                                                                                                                                                                                                                                                                                                                                                                                                                                                                                                                                                                                                                                                                                                                                                                                                                                                                                                                                                                                                                                                                                                                                                                                                                                                                                                                                                                                                                                                                                                                                                                                                                                                                                                                                                                                                                                                                                                                                                                  |         |  |  |  |  |  |  |  |      |  |   |     |     |     |     |     |     |       |       |   |   |   |   |   |   |   |  |     |   |   |   |   |   |   |   |  |     |   |   |   |   |   |   |   |  |     |   |   |   |   |   |   |   |  |    |   |   |   |   |   |   |   |  |    |   |   |   |   |   |   |   |  |    |   |   |   |   |   |   |   |  |    |   |   |   |   |   |   |   |  |    |   |   |   |   |   |   |   |  |    |   |   |   |   |   |   |   |  |   |   |   |   |   |   |   |   |  |   |   |   |   |   |   |   |   |  |   |   |   |   |   |   |   |   |  |   |   |   |   |   |   |   |   |  |   |   |   |   |   |   |   |   |  |   |   |   |   |   |   |   |   |  |   |   |   |   |   |   |   |   |  |   |   |   |   |   |   |   |   |  |   |   |   |   |   |   |   |   |  |   |   |   |   |   |   |   |   |  |   |   |   |   |   |   |   |   |  |   |   |   |   |   |   |   |   |  |   |   |   |   |   |   |   |   |  |   |   |   |   |   |   |   |   |  |   |   |   |   |   |   |   |   |  |   |   |   |   |   |   |   |   |  |   |   |   |   |   |   |   |   |  |   |   |   |   |   |   |   |   |  |   |   |   |   |   |   |   |   |  |   |   |   |   |   |   |   |   |  |   |   |   |   |   |   |   |   |  |   |   |   |   |   |   |   |   |  |   |   |   |   |   |   |   |   |  |   |   |   |   |   |   |   |   |  |   |   |   |   |   |   |   |   |
|         | 12                                                                                                                                                                                                                                                                                                                                                                                                                                                                                                                                                                                                                                                                                                                                                                                                                                                                                                                                                                                                                                                                                                                                                                                                                                                                                                                                                                                                                                                                                                       | A            | F   | N   | Y   | Q   | D   | T   |    |      |     |     |     |     |     |     |     |     |   |       |   |   |   |   |   |   |   |   |     |   |   |                                                                                                                                                                                                                                                                                                                                                                                                                                                                                                                                                                                                                                                                                |         |   |   |   |  |   |    |     |     |     |     |   |   |   |   |    |   |   |   |   |    |   |   |   |   |    |   |   |   |   |   |   |   |   |   |   |   |   |   |   |   |   |   |   |   |   |   |   |   |   |   |   |   |   |   |   |   |   |  |   |   |   |   |   |   |   |   |   |   |   |   |   |   |   |   |   |  |   |   |   |   |   |   |   |   |  |   |   |   |   |   |   |   |   |  |   |   |   |   |   |   |   |   |                                                                                                                                                                                                                                                                                                                                                                                                                                                                                                                                                                                                                                                                                                                                                                                                                                                                                                                                                                                                                                                                                                                                                                                                                                                                                                                                                                                                                                                                                                                                                                                                                                                                                                                                                                                                                                                                                                                                                                                                                                                                                                                                                                                                                                                                                                                                                                                                                                                                                                                                                                                                                                                                                                                                                                                                                                                                                                                                                                                                                                                                                                                                                                                                                                                                                                                                                                                                                                                                                                                                                                                                                                                                |         |  |  |  |  |  |  |  |      |  |   |     |     |     |     |     |     |   |       |   |   |   |   |   |   |   |  |    |   |   |   |   |   |   |   |  |   |   |   |   |   |   |   |   |  |   |   |   |   |   |   |   |   |  |   |   |   |   |   |   |   |   |  |   |   |   |   |   |   |   |   |  |   |   |   |   |   |   |   |   |  |   |   |   |   |   |   |   |   |  |   |   |   |   |   |   |   |   |  |   |   |   |   |   |   |   |   |  |   |   |   |   |   |   |   |   |  |   |   |   |   |   |   |   |   |  |   |   |   |   |   |   |   |   |   |       |   |   |   |   |   |   |   |  |     |   |   |   |   |   |   |   |  |    |   |   |   |   |   |   |   |  |    |   |   |   |   |   |   |   |  |    |   |   |   |   |   |   |   |  |    |   |   |   |   |   |   |   |  |    |   |   |   |   |   |   |   |  |   |   |   |   |   |   |   |   |  |   |   |   |   |   |   |   |   |  |   |   |   |   |   |   |   |   |  |   |   |   |   |   |   |   |   |  |   |   |   |   |   |   |   |   |  |   |   |   |   |   |   |   |   |  |   |   |   |   |   |   |   |   |  |   |   |   |   |   |   |   |   |  |   |   |   |   |   |   |   |   |  |   |   |   |   |   |   |   |   |  |   |   |   |   |   |   |   |   |  |   |   |   |   |   |   |   |   |   |     |   |   |   |   |   |   |   |  |   |   |   |   |   |   |   |   |                                                                                                                                                                                                                                                                                                                                                                                                                                                                                                                                                                                                                                                                                                                                                                                                                                                                                                                                                                                                                                                                                                                                                                                                                                                                                                                                                                                                                                                                                                                                                                                                                                                                                                                                                                                                                                                                                                                                                                                                                                                                                                                                                                                                                                                                                                                                                                                                                                                                                                                                                                                                                                                                                                                                                                                                                                                                                                                                                                                                                                                                                                                                                                                                                                                                                                                                                                                                                                                                                                                                                                                                                                                                                                                                                                  |         |  |  |  |  |  |  |  |      |  |   |     |     |     |     |     |     |       |       |   |   |   |   |   |   |   |  |     |   |   |   |   |   |   |   |  |     |   |   |   |   |   |   |   |  |     |   |   |   |   |   |   |   |  |    |   |   |   |   |   |   |   |  |    |   |   |   |   |   |   |   |  |    |   |   |   |   |   |   |   |  |    |   |   |   |   |   |   |   |  |    |   |   |   |   |   |   |   |  |    |   |   |   |   |   |   |   |  |   |   |   |   |   |   |   |   |  |   |   |   |   |   |   |   |   |  |   |   |   |   |   |   |   |   |  |   |   |   |   |   |   |   |   |  |   |   |   |   |   |   |   |   |  |   |   |   |   |   |   |   |   |  |   |   |   |   |   |   |   |   |  |   |   |   |   |   |   |   |   |  |   |   |   |   |   |   |   |   |  |   |   |   |   |   |   |   |   |  |   |   |   |   |   |   |   |   |  |   |   |   |   |   |   |   |   |  |   |   |   |   |   |   |   |   |  |   |   |   |   |   |   |   |   |  |   |   |   |   |   |   |   |   |  |   |   |   |   |   |   |   |   |  |   |   |   |   |   |   |   |   |  |   |   |   |   |   |   |   |   |  |   |   |   |   |   |   |   |   |  |   |   |   |   |   |   |   |   |  |   |   |   |   |   |   |   |   |  |   |   |   |   |   |   |   |   |  |   |   |   |   |   |   |   |   |  |   |   |   |   |   |   |   |   |  |   |   |   |   |   |   |   |   |
|         | 6                                                                                                                                                                                                                                                                                                                                                                                                                                                                                                                                                                                                                                                                                                                                                                                                                                                                                                                                                                                                                                                                                                                                                                                                                                                                                                                                                                                                                                                                                                        | A            | F   | N   | I   | Q   | D   | T   |    |      |     |     |     |     |     |     |     |     |   |       |   |   |   |   |   |   |   |   |     |   |   |                                                                                                                                                                                                                                                                                                                                                                                                                                                                                                                                                                                                                                                                                |         |   |   |   |  |   |    |     |     |     |     |   |   |   |   |    |   |   |   |   |    |   |   |   |   |    |   |   |   |   |   |   |   |   |   |   |   |   |   |   |   |   |   |   |   |   |   |   |   |   |   |   |   |   |   |   |   |   |  |   |   |   |   |   |   |   |   |   |   |   |   |   |   |   |   |   |  |   |   |   |   |   |   |   |   |  |   |   |   |   |   |   |   |   |  |   |   |   |   |   |   |   |   |                                                                                                                                                                                                                                                                                                                                                                                                                                                                                                                                                                                                                                                                                                                                                                                                                                                                                                                                                                                                                                                                                                                                                                                                                                                                                                                                                                                                                                                                                                                                                                                                                                                                                                                                                                                                                                                                                                                                                                                                                                                                                                                                                                                                                                                                                                                                                                                                                                                                                                                                                                                                                                                                                                                                                                                                                                                                                                                                                                                                                                                                                                                                                                                                                                                                                                                                                                                                                                                                                                                                                                                                                                                                |         |  |  |  |  |  |  |  |      |  |   |     |     |     |     |     |     |   |       |   |   |   |   |   |   |   |  |    |   |   |   |   |   |   |   |  |   |   |   |   |   |   |   |   |  |   |   |   |   |   |   |   |   |  |   |   |   |   |   |   |   |   |  |   |   |   |   |   |   |   |   |  |   |   |   |   |   |   |   |   |  |   |   |   |   |   |   |   |   |  |   |   |   |   |   |   |   |   |  |   |   |   |   |   |   |   |   |  |   |   |   |   |   |   |   |   |  |   |   |   |   |   |   |   |   |  |   |   |   |   |   |   |   |   |   |       |   |   |   |   |   |   |   |  |     |   |   |   |   |   |   |   |  |    |   |   |   |   |   |   |   |  |    |   |   |   |   |   |   |   |  |    |   |   |   |   |   |   |   |  |    |   |   |   |   |   |   |   |  |    |   |   |   |   |   |   |   |  |   |   |   |   |   |   |   |   |  |   |   |   |   |   |   |   |   |  |   |   |   |   |   |   |   |   |  |   |   |   |   |   |   |   |   |  |   |   |   |   |   |   |   |   |  |   |   |   |   |   |   |   |   |  |   |   |   |   |   |   |   |   |  |   |   |   |   |   |   |   |   |  |   |   |   |   |   |   |   |   |  |   |   |   |   |   |   |   |   |  |   |   |   |   |   |   |   |   |  |   |   |   |   |   |   |   |   |   |     |   |   |   |   |   |   |   |  |   |   |   |   |   |   |   |   |                                                                                                                                                                                                                                                                                                                                                                                                                                                                                                                                                                                                                                                                                                                                                                                                                                                                                                                                                                                                                                                                                                                                                                                                                                                                                                                                                                                                                                                                                                                                                                                                                                                                                                                                                                                                                                                                                                                                                                                                                                                                                                                                                                                                                                                                                                                                                                                                                                                                                                                                                                                                                                                                                                                                                                                                                                                                                                                                                                                                                                                                                                                                                                                                                                                                                                                                                                                                                                                                                                                                                                                                                                                                                                                                                                  |         |  |  |  |  |  |  |  |      |  |   |     |     |     |     |     |     |       |       |   |   |   |   |   |   |   |  |     |   |   |   |   |   |   |   |  |     |   |   |   |   |   |   |   |  |     |   |   |   |   |   |   |   |  |    |   |   |   |   |   |   |   |  |    |   |   |   |   |   |   |   |  |    |   |   |   |   |   |   |   |  |    |   |   |   |   |   |   |   |  |    |   |   |   |   |   |   |   |  |    |   |   |   |   |   |   |   |  |   |   |   |   |   |   |   |   |  |   |   |   |   |   |   |   |   |  |   |   |   |   |   |   |   |   |  |   |   |   |   |   |   |   |   |  |   |   |   |   |   |   |   |   |  |   |   |   |   |   |   |   |   |  |   |   |   |   |   |   |   |   |  |   |   |   |   |   |   |   |   |  |   |   |   |   |   |   |   |   |  |   |   |   |   |   |   |   |   |  |   |   |   |   |   |   |   |   |  |   |   |   |   |   |   |   |   |  |   |   |   |   |   |   |   |   |  |   |   |   |   |   |   |   |   |  |   |   |   |   |   |   |   |   |  |   |   |   |   |   |   |   |   |  |   |   |   |   |   |   |   |   |  |   |   |   |   |   |   |   |   |  |   |   |   |   |   |   |   |   |  |   |   |   |   |   |   |   |   |  |   |   |   |   |   |   |   |   |  |   |   |   |   |   |   |   |   |  |   |   |   |   |   |   |   |   |  |   |   |   |   |   |   |   |   |  |   |   |   |   |   |   |   |   |
|         | 5                                                                                                                                                                                                                                                                                                                                                                                                                                                                                                                                                                                                                                                                                                                                                                                                                                                                                                                                                                                                                                                                                                                                                                                                                                                                                                                                                                                                                                                                                                        | A            | F   | A   | L   | Q   | D   | T   |    |      |     |     |     |     |     |     |     |     |   |       |   |   |   |   |   |   |   |   |     |   |   |                                                                                                                                                                                                                                                                                                                                                                                                                                                                                                                                                                                                                                                                                |         |   |   |   |  |   |    |     |     |     |     |   |   |   |   |    |   |   |   |   |    |   |   |   |   |    |   |   |   |   |   |   |   |   |   |   |   |   |   |   |   |   |   |   |   |   |   |   |   |   |   |   |   |   |   |   |   |   |  |   |   |   |   |   |   |   |   |   |   |   |   |   |   |   |   |   |  |   |   |   |   |   |   |   |   |  |   |   |   |   |   |   |   |   |  |   |   |   |   |   |   |   |   |                                                                                                                                                                                                                                                                                                                                                                                                                                                                                                                                                                                                                                                                                                                                                                                                                                                                                                                                                                                                                                                                                                                                                                                                                                                                                                                                                                                                                                                                                                                                                                                                                                                                                                                                                                                                                                                                                                                                                                                                                                                                                                                                                                                                                                                                                                                                                                                                                                                                                                                                                                                                                                                                                                                                                                                                                                                                                                                                                                                                                                                                                                                                                                                                                                                                                                                                                                                                                                                                                                                                                                                                                                                                |         |  |  |  |  |  |  |  |      |  |   |     |     |     |     |     |     |   |       |   |   |   |   |   |   |   |  |    |   |   |   |   |   |   |   |  |   |   |   |   |   |   |   |   |  |   |   |   |   |   |   |   |   |  |   |   |   |   |   |   |   |   |  |   |   |   |   |   |   |   |   |  |   |   |   |   |   |   |   |   |  |   |   |   |   |   |   |   |   |  |   |   |   |   |   |   |   |   |  |   |   |   |   |   |   |   |   |  |   |   |   |   |   |   |   |   |  |   |   |   |   |   |   |   |   |  |   |   |   |   |   |   |   |   |   |       |   |   |   |   |   |   |   |  |     |   |   |   |   |   |   |   |  |    |   |   |   |   |   |   |   |  |    |   |   |   |   |   |   |   |  |    |   |   |   |   |   |   |   |  |    |   |   |   |   |   |   |   |  |    |   |   |   |   |   |   |   |  |   |   |   |   |   |   |   |   |  |   |   |   |   |   |   |   |   |  |   |   |   |   |   |   |   |   |  |   |   |   |   |   |   |   |   |  |   |   |   |   |   |   |   |   |  |   |   |   |   |   |   |   |   |  |   |   |   |   |   |   |   |   |  |   |   |   |   |   |   |   |   |  |   |   |   |   |   |   |   |   |  |   |   |   |   |   |   |   |   |  |   |   |   |   |   |   |   |   |  |   |   |   |   |   |   |   |   |   |     |   |   |   |   |   |   |   |  |   |   |   |   |   |   |   |   |                                                                                                                                                                                                                                                                                                                                                                                                                                                                                                                                                                                                                                                                                                                                                                                                                                                                                                                                                                                                                                                                                                                                                                                                                                                                                                                                                                                                                                                                                                                                                                                                                                                                                                                                                                                                                                                                                                                                                                                                                                                                                                                                                                                                                                                                                                                                                                                                                                                                                                                                                                                                                                                                                                                                                                                                                                                                                                                                                                                                                                                                                                                                                                                                                                                                                                                                                                                                                                                                                                                                                                                                                                                                                                                                                                  |         |  |  |  |  |  |  |  |      |  |   |     |     |     |     |     |     |       |       |   |   |   |   |   |   |   |  |     |   |   |   |   |   |   |   |  |     |   |   |   |   |   |   |   |  |     |   |   |   |   |   |   |   |  |    |   |   |   |   |   |   |   |  |    |   |   |   |   |   |   |   |  |    |   |   |   |   |   |   |   |  |    |   |   |   |   |   |   |   |  |    |   |   |   |   |   |   |   |  |    |   |   |   |   |   |   |   |  |   |   |   |   |   |   |   |   |  |   |   |   |   |   |   |   |   |  |   |   |   |   |   |   |   |   |  |   |   |   |   |   |   |   |   |  |   |   |   |   |   |   |   |   |  |   |   |   |   |   |   |   |   |  |   |   |   |   |   |   |   |   |  |   |   |   |   |   |   |   |   |  |   |   |   |   |   |   |   |   |  |   |   |   |   |   |   |   |   |  |   |   |   |   |   |   |   |   |  |   |   |   |   |   |   |   |   |  |   |   |   |   |   |   |   |   |  |   |   |   |   |   |   |   |   |  |   |   |   |   |   |   |   |   |  |   |   |   |   |   |   |   |   |  |   |   |   |   |   |   |   |   |  |   |   |   |   |   |   |   |   |  |   |   |   |   |   |   |   |   |  |   |   |   |   |   |   |   |   |  |   |   |   |   |   |   |   |   |  |   |   |   |   |   |   |   |   |  |   |   |   |   |   |   |   |   |  |   |   |   |   |   |   |   |   |  |   |   |   |   |   |   |   |   |
|         | 3                                                                                                                                                                                                                                                                                                                                                                                                                                                                                                                                                                                                                                                                                                                                                                                                                                                                                                                                                                                                                                                                                                                                                                                                                                                                                                                                                                                                                                                                                                        | A            | F   | A   | Y   | Q   | D   | S   |    |      |     |     |     |     |     |     |     |     |   |       |   |   |   |   |   |   |   |   |     |   |   |                                                                                                                                                                                                                                                                                                                                                                                                                                                                                                                                                                                                                                                                                |         |   |   |   |  |   |    |     |     |     |     |   |   |   |   |    |   |   |   |   |    |   |   |   |   |    |   |   |   |   |   |   |   |   |   |   |   |   |   |   |   |   |   |   |   |   |   |   |   |   |   |   |   |   |   |   |   |   |  |   |   |   |   |   |   |   |   |   |   |   |   |   |   |   |   |   |  |   |   |   |   |   |   |   |   |  |   |   |   |   |   |   |   |   |  |   |   |   |   |   |   |   |   |                                                                                                                                                                                                                                                                                                                                                                                                                                                                                                                                                                                                                                                                                                                                                                                                                                                                                                                                                                                                                                                                                                                                                                                                                                                                                                                                                                                                                                                                                                                                                                                                                                                                                                                                                                                                                                                                                                                                                                                                                                                                                                                                                                                                                                                                                                                                                                                                                                                                                                                                                                                                                                                                                                                                                                                                                                                                                                                                                                                                                                                                                                                                                                                                                                                                                                                                                                                                                                                                                                                                                                                                                                                                |         |  |  |  |  |  |  |  |      |  |   |     |     |     |     |     |     |   |       |   |   |   |   |   |   |   |  |    |   |   |   |   |   |   |   |  |   |   |   |   |   |   |   |   |  |   |   |   |   |   |   |   |   |  |   |   |   |   |   |   |   |   |  |   |   |   |   |   |   |   |   |  |   |   |   |   |   |   |   |   |  |   |   |   |   |   |   |   |   |  |   |   |   |   |   |   |   |   |  |   |   |   |   |   |   |   |   |  |   |   |   |   |   |   |   |   |  |   |   |   |   |   |   |   |   |  |   |   |   |   |   |   |   |   |   |       |   |   |   |   |   |   |   |  |     |   |   |   |   |   |   |   |  |    |   |   |   |   |   |   |   |  |    |   |   |   |   |   |   |   |  |    |   |   |   |   |   |   |   |  |    |   |   |   |   |   |   |   |  |    |   |   |   |   |   |   |   |  |   |   |   |   |   |   |   |   |  |   |   |   |   |   |   |   |   |  |   |   |   |   |   |   |   |   |  |   |   |   |   |   |   |   |   |  |   |   |   |   |   |   |   |   |  |   |   |   |   |   |   |   |   |  |   |   |   |   |   |   |   |   |  |   |   |   |   |   |   |   |   |  |   |   |   |   |   |   |   |   |  |   |   |   |   |   |   |   |   |  |   |   |   |   |   |   |   |   |  |   |   |   |   |   |   |   |   |   |     |   |   |   |   |   |   |   |  |   |   |   |   |   |   |   |   |                                                                                                                                                                                                                                                                                                                                                                                                                                                                                                                                                                                                                                                                                                                                                                                                                                                                                                                                                                                                                                                                                                                                                                                                                                                                                                                                                                                                                                                                                                                                                                                                                                                                                                                                                                                                                                                                                                                                                                                                                                                                                                                                                                                                                                                                                                                                                                                                                                                                                                                                                                                                                                                                                                                                                                                                                                                                                                                                                                                                                                                                                                                                                                                                                                                                                                                                                                                                                                                                                                                                                                                                                                                                                                                                                                  |         |  |  |  |  |  |  |  |      |  |   |     |     |     |     |     |     |       |       |   |   |   |   |   |   |   |  |     |   |   |   |   |   |   |   |  |     |   |   |   |   |   |   |   |  |     |   |   |   |   |   |   |   |  |    |   |   |   |   |   |   |   |  |    |   |   |   |   |   |   |   |  |    |   |   |   |   |   |   |   |  |    |   |   |   |   |   |   |   |  |    |   |   |   |   |   |   |   |  |    |   |   |   |   |   |   |   |  |   |   |   |   |   |   |   |   |  |   |   |   |   |   |   |   |   |  |   |   |   |   |   |   |   |   |  |   |   |   |   |   |   |   |   |  |   |   |   |   |   |   |   |   |  |   |   |   |   |   |   |   |   |  |   |   |   |   |   |   |   |   |  |   |   |   |   |   |   |   |   |  |   |   |   |   |   |   |   |   |  |   |   |   |   |   |   |   |   |  |   |   |   |   |   |   |   |   |  |   |   |   |   |   |   |   |   |  |   |   |   |   |   |   |   |   |  |   |   |   |   |   |   |   |   |  |   |   |   |   |   |   |   |   |  |   |   |   |   |   |   |   |   |  |   |   |   |   |   |   |   |   |  |   |   |   |   |   |   |   |   |  |   |   |   |   |   |   |   |   |  |   |   |   |   |   |   |   |   |  |   |   |   |   |   |   |   |   |  |   |   |   |   |   |   |   |   |  |   |   |   |   |   |   |   |   |  |   |   |   |   |   |   |   |   |  |   |   |   |   |   |   |   |   |
|         | 2                                                                                                                                                                                                                                                                                                                                                                                                                                                                                                                                                                                                                                                                                                                                                                                                                                                                                                                                                                                                                                                                                                                                                                                                                                                                                                                                                                                                                                                                                                        | A            | F   | A   | I   | Q   | D   | T   |    |      |     |     |     |     |     |     |     |     |   |       |   |   |   |   |   |   |   |   |     |   |   |                                                                                                                                                                                                                                                                                                                                                                                                                                                                                                                                                                                                                                                                                |         |   |   |   |  |   |    |     |     |     |     |   |   |   |   |    |   |   |   |   |    |   |   |   |   |    |   |   |   |   |   |   |   |   |   |   |   |   |   |   |   |   |   |   |   |   |   |   |   |   |   |   |   |   |   |   |   |   |  |   |   |   |   |   |   |   |   |   |   |   |   |   |   |   |   |   |  |   |   |   |   |   |   |   |   |  |   |   |   |   |   |   |   |   |  |   |   |   |   |   |   |   |   |                                                                                                                                                                                                                                                                                                                                                                                                                                                                                                                                                                                                                                                                                                                                                                                                                                                                                                                                                                                                                                                                                                                                                                                                                                                                                                                                                                                                                                                                                                                                                                                                                                                                                                                                                                                                                                                                                                                                                                                                                                                                                                                                                                                                                                                                                                                                                                                                                                                                                                                                                                                                                                                                                                                                                                                                                                                                                                                                                                                                                                                                                                                                                                                                                                                                                                                                                                                                                                                                                                                                                                                                                                                                |         |  |  |  |  |  |  |  |      |  |   |     |     |     |     |     |     |   |       |   |   |   |   |   |   |   |  |    |   |   |   |   |   |   |   |  |   |   |   |   |   |   |   |   |  |   |   |   |   |   |   |   |   |  |   |   |   |   |   |   |   |   |  |   |   |   |   |   |   |   |   |  |   |   |   |   |   |   |   |   |  |   |   |   |   |   |   |   |   |  |   |   |   |   |   |   |   |   |  |   |   |   |   |   |   |   |   |  |   |   |   |   |   |   |   |   |  |   |   |   |   |   |   |   |   |  |   |   |   |   |   |   |   |   |   |       |   |   |   |   |   |   |   |  |     |   |   |   |   |   |   |   |  |    |   |   |   |   |   |   |   |  |    |   |   |   |   |   |   |   |  |    |   |   |   |   |   |   |   |  |    |   |   |   |   |   |   |   |  |    |   |   |   |   |   |   |   |  |   |   |   |   |   |   |   |   |  |   |   |   |   |   |   |   |   |  |   |   |   |   |   |   |   |   |  |   |   |   |   |   |   |   |   |  |   |   |   |   |   |   |   |   |  |   |   |   |   |   |   |   |   |  |   |   |   |   |   |   |   |   |  |   |   |   |   |   |   |   |   |  |   |   |   |   |   |   |   |   |  |   |   |   |   |   |   |   |   |  |   |   |   |   |   |   |   |   |  |   |   |   |   |   |   |   |   |   |     |   |   |   |   |   |   |   |  |   |   |   |   |   |   |   |   |                                                                                                                                                                                                                                                                                                                                                                                                                                                                                                                                                                                                                                                                                                                                                                                                                                                                                                                                                                                                                                                                                                                                                                                                                                                                                                                                                                                                                                                                                                                                                                                                                                                                                                                                                                                                                                                                                                                                                                                                                                                                                                                                                                                                                                                                                                                                                                                                                                                                                                                                                                                                                                                                                                                                                                                                                                                                                                                                                                                                                                                                                                                                                                                                                                                                                                                                                                                                                                                                                                                                                                                                                                                                                                                                                                  |         |  |  |  |  |  |  |  |      |  |   |     |     |     |     |     |     |       |       |   |   |   |   |   |   |   |  |     |   |   |   |   |   |   |   |  |     |   |   |   |   |   |   |   |  |     |   |   |   |   |   |   |   |  |    |   |   |   |   |   |   |   |  |    |   |   |   |   |   |   |   |  |    |   |   |   |   |   |   |   |  |    |   |   |   |   |   |   |   |  |    |   |   |   |   |   |   |   |  |    |   |   |   |   |   |   |   |  |   |   |   |   |   |   |   |   |  |   |   |   |   |   |   |   |   |  |   |   |   |   |   |   |   |   |  |   |   |   |   |   |   |   |   |  |   |   |   |   |   |   |   |   |  |   |   |   |   |   |   |   |   |  |   |   |   |   |   |   |   |   |  |   |   |   |   |   |   |   |   |  |   |   |   |   |   |   |   |   |  |   |   |   |   |   |   |   |   |  |   |   |   |   |   |   |   |   |  |   |   |   |   |   |   |   |   |  |   |   |   |   |   |   |   |   |  |   |   |   |   |   |   |   |   |  |   |   |   |   |   |   |   |   |  |   |   |   |   |   |   |   |   |  |   |   |   |   |   |   |   |   |  |   |   |   |   |   |   |   |   |  |   |   |   |   |   |   |   |   |  |   |   |   |   |   |   |   |   |  |   |   |   |   |   |   |   |   |  |   |   |   |   |   |   |   |   |  |   |   |   |   |   |   |   |   |  |   |   |   |   |   |   |   |   |  |   |   |   |   |   |   |   |   |
|         | 2                                                                                                                                                                                                                                                                                                                                                                                                                                                                                                                                                                                                                                                                                                                                                                                                                                                                                                                                                                                                                                                                                                                                                                                                                                                                                                                                                                                                                                                                                                        | A            | F   | N   | I   | Q   | D   | T   |    |      |     |     |     |     |     |     |     |     |   |       |   |   |   |   |   |   |   |   |     |   |   |                                                                                                                                                                                                                                                                                                                                                                                                                                                                                                                                                                                                                                                                                |         |   |   |   |  |   |    |     |     |     |     |   |   |   |   |    |   |   |   |   |    |   |   |   |   |    |   |   |   |   |   |   |   |   |   |   |   |   |   |   |   |   |   |   |   |   |   |   |   |   |   |   |   |   |   |   |   |   |  |   |   |   |   |   |   |   |   |   |   |   |   |   |   |   |   |   |  |   |   |   |   |   |   |   |   |  |   |   |   |   |   |   |   |   |  |   |   |   |   |   |   |   |   |                                                                                                                                                                                                                                                                                                                                                                                                                                                                                                                                                                                                                                                                                                                                                                                                                                                                                                                                                                                                                                                                                                                                                                                                                                                                                                                                                                                                                                                                                                                                                                                                                                                                                                                                                                                                                                                                                                                                                                                                                                                                                                                                                                                                                                                                                                                                                                                                                                                                                                                                                                                                                                                                                                                                                                                                                                                                                                                                                                                                                                                                                                                                                                                                                                                                                                                                                                                                                                                                                                                                                                                                                                                                |         |  |  |  |  |  |  |  |      |  |   |     |     |     |     |     |     |   |       |   |   |   |   |   |   |   |  |    |   |   |   |   |   |   |   |  |   |   |   |   |   |   |   |   |  |   |   |   |   |   |   |   |   |  |   |   |   |   |   |   |   |   |  |   |   |   |   |   |   |   |   |  |   |   |   |   |   |   |   |   |  |   |   |   |   |   |   |   |   |  |   |   |   |   |   |   |   |   |  |   |   |   |   |   |   |   |   |  |   |   |   |   |   |   |   |   |  |   |   |   |   |   |   |   |   |  |   |   |   |   |   |   |   |   |   |       |   |   |   |   |   |   |   |  |     |   |   |   |   |   |   |   |  |    |   |   |   |   |   |   |   |  |    |   |   |   |   |   |   |   |  |    |   |   |   |   |   |   |   |  |    |   |   |   |   |   |   |   |  |    |   |   |   |   |   |   |   |  |   |   |   |   |   |   |   |   |  |   |   |   |   |   |   |   |   |  |   |   |   |   |   |   |   |   |  |   |   |   |   |   |   |   |   |  |   |   |   |   |   |   |   |   |  |   |   |   |   |   |   |   |   |  |   |   |   |   |   |   |   |   |  |   |   |   |   |   |   |   |   |  |   |   |   |   |   |   |   |   |  |   |   |   |   |   |   |   |   |  |   |   |   |   |   |   |   |   |  |   |   |   |   |   |   |   |   |   |     |   |   |   |   |   |   |   |  |   |   |   |   |   |   |   |   |                                                                                                                                                                                                                                                                                                                                                                                                                                                                                                                                                                                                                                                                                                                                                                                                                                                                                                                                                                                                                                                                                                                                                                                                                                                                                                                                                                                                                                                                                                                                                                                                                                                                                                                                                                                                                                                                                                                                                                                                                                                                                                                                                                                                                                                                                                                                                                                                                                                                                                                                                                                                                                                                                                                                                                                                                                                                                                                                                                                                                                                                                                                                                                                                                                                                                                                                                                                                                                                                                                                                                                                                                                                                                                                                                                  |         |  |  |  |  |  |  |  |      |  |   |     |     |     |     |     |     |       |       |   |   |   |   |   |   |   |  |     |   |   |   |   |   |   |   |  |     |   |   |   |   |   |   |   |  |     |   |   |   |   |   |   |   |  |    |   |   |   |   |   |   |   |  |    |   |   |   |   |   |   |   |  |    |   |   |   |   |   |   |   |  |    |   |   |   |   |   |   |   |  |    |   |   |   |   |   |   |   |  |    |   |   |   |   |   |   |   |  |   |   |   |   |   |   |   |   |  |   |   |   |   |   |   |   |   |  |   |   |   |   |   |   |   |   |  |   |   |   |   |   |   |   |   |  |   |   |   |   |   |   |   |   |  |   |   |   |   |   |   |   |   |  |   |   |   |   |   |   |   |   |  |   |   |   |   |   |   |   |   |  |   |   |   |   |   |   |   |   |  |   |   |   |   |   |   |   |   |  |   |   |   |   |   |   |   |   |  |   |   |   |   |   |   |   |   |  |   |   |   |   |   |   |   |   |  |   |   |   |   |   |   |   |   |  |   |   |   |   |   |   |   |   |  |   |   |   |   |   |   |   |   |  |   |   |   |   |   |   |   |   |  |   |   |   |   |   |   |   |   |  |   |   |   |   |   |   |   |   |  |   |   |   |   |   |   |   |   |  |   |   |   |   |   |   |   |   |  |   |   |   |   |   |   |   |   |  |   |   |   |   |   |   |   |   |  |   |   |   |   |   |   |   |   |  |   |   |   |   |   |   |   |   |
|         | 2                                                                                                                                                                                                                                                                                                                                                                                                                                                                                                                                                                                                                                                                                                                                                                                                                                                                                                                                                                                                                                                                                                                                                                                                                                                                                                                                                                                                                                                                                                        | A            | F   | A   | Y   | Q   | D   | A   |    |      |     |     |     |     |     |     |     |     |   |       |   |   |   |   |   |   |   |   |     |   |   |                                                                                                                                                                                                                                                                                                                                                                                                                                                                                                                                                                                                                                                                                |         |   |   |   |  |   |    |     |     |     |     |   |   |   |   |    |   |   |   |   |    |   |   |   |   |    |   |   |   |   |   |   |   |   |   |   |   |   |   |   |   |   |   |   |   |   |   |   |   |   |   |   |   |   |   |   |   |   |  |   |   |   |   |   |   |   |   |   |   |   |   |   |   |   |   |   |  |   |   |   |   |   |   |   |   |  |   |   |   |   |   |   |   |   |  |   |   |   |   |   |   |   |   |                                                                                                                                                                                                                                                                                                                                                                                                                                                                                                                                                                                                                                                                                                                                                                                                                                                                                                                                                                                                                                                                                                                                                                                                                                                                                                                                                                                                                                                                                                                                                                                                                                                                                                                                                                                                                                                                                                                                                                                                                                                                                                                                                                                                                                                                                                                                                                                                                                                                                                                                                                                                                                                                                                                                                                                                                                                                                                                                                                                                                                                                                                                                                                                                                                                                                                                                                                                                                                                                                                                                                                                                                                                                |         |  |  |  |  |  |  |  |      |  |   |     |     |     |     |     |     |   |       |   |   |   |   |   |   |   |  |    |   |   |   |   |   |   |   |  |   |   |   |   |   |   |   |   |  |   |   |   |   |   |   |   |   |  |   |   |   |   |   |   |   |   |  |   |   |   |   |   |   |   |   |  |   |   |   |   |   |   |   |   |  |   |   |   |   |   |   |   |   |  |   |   |   |   |   |   |   |   |  |   |   |   |   |   |   |   |   |  |   |   |   |   |   |   |   |   |  |   |   |   |   |   |   |   |   |  |   |   |   |   |   |   |   |   |   |       |   |   |   |   |   |   |   |  |     |   |   |   |   |   |   |   |  |    |   |   |   |   |   |   |   |  |    |   |   |   |   |   |   |   |  |    |   |   |   |   |   |   |   |  |    |   |   |   |   |   |   |   |  |    |   |   |   |   |   |   |   |  |   |   |   |   |   |   |   |   |  |   |   |   |   |   |   |   |   |  |   |   |   |   |   |   |   |   |  |   |   |   |   |   |   |   |   |  |   |   |   |   |   |   |   |   |  |   |   |   |   |   |   |   |   |  |   |   |   |   |   |   |   |   |  |   |   |   |   |   |   |   |   |  |   |   |   |   |   |   |   |   |  |   |   |   |   |   |   |   |   |  |   |   |   |   |   |   |   |   |  |   |   |   |   |   |   |   |   |   |     |   |   |   |   |   |   |   |  |   |   |   |   |   |   |   |   |                                                                                                                                                                                                                                                                                                                                                                                                                                                                                                                                                                                                                                                                                                                                                                                                                                                                                                                                                                                                                                                                                                                                                                                                                                                                                                                                                                                                                                                                                                                                                                                                                                                                                                                                                                                                                                                                                                                                                                                                                                                                                                                                                                                                                                                                                                                                                                                                                                                                                                                                                                                                                                                                                                                                                                                                                                                                                                                                                                                                                                                                                                                                                                                                                                                                                                                                                                                                                                                                                                                                                                                                                                                                                                                                                                  |         |  |  |  |  |  |  |  |      |  |   |     |     |     |     |     |     |       |       |   |   |   |   |   |   |   |  |     |   |   |   |   |   |   |   |  |     |   |   |   |   |   |   |   |  |     |   |   |   |   |   |   |   |  |    |   |   |   |   |   |   |   |  |    |   |   |   |   |   |   |   |  |    |   |   |   |   |   |   |   |  |    |   |   |   |   |   |   |   |  |    |   |   |   |   |   |   |   |  |    |   |   |   |   |   |   |   |  |   |   |   |   |   |   |   |   |  |   |   |   |   |   |   |   |   |  |   |   |   |   |   |   |   |   |  |   |   |   |   |   |   |   |   |  |   |   |   |   |   |   |   |   |  |   |   |   |   |   |   |   |   |  |   |   |   |   |   |   |   |   |  |   |   |   |   |   |   |   |   |  |   |   |   |   |   |   |   |   |  |   |   |   |   |   |   |   |   |  |   |   |   |   |   |   |   |   |  |   |   |   |   |   |   |   |   |  |   |   |   |   |   |   |   |   |  |   |   |   |   |   |   |   |   |  |   |   |   |   |   |   |   |   |  |   |   |   |   |   |   |   |   |  |   |   |   |   |   |   |   |   |  |   |   |   |   |   |   |   |   |  |   |   |   |   |   |   |   |   |  |   |   |   |   |   |   |   |   |  |   |   |   |   |   |   |   |   |  |   |   |   |   |   |   |   |   |  |   |   |   |   |   |   |   |   |  |   |   |   |   |   |   |   |   |  |   |   |   |   |   |   |   |   |
|         | 1                                                                                                                                                                                                                                                                                                                                                                                                                                                                                                                                                                                                                                                                                                                                                                                                                                                                                                                                                                                                                                                                                                                                                                                                                                                                                                                                                                                                                                                                                                        | A            | L   | A   | Y   | Q   | D   | T   |    |      |     |     |     |     |     |     |     |     |   |       |   |   |   |   |   |   |   |   |     |   |   |                                                                                                                                                                                                                                                                                                                                                                                                                                                                                                                                                                                                                                                                                |         |   |   |   |  |   |    |     |     |     |     |   |   |   |   |    |   |   |   |   |    |   |   |   |   |    |   |   |   |   |   |   |   |   |   |   |   |   |   |   |   |   |   |   |   |   |   |   |   |   |   |   |   |   |   |   |   |   |  |   |   |   |   |   |   |   |   |   |   |   |   |   |   |   |   |   |  |   |   |   |   |   |   |   |   |  |   |   |   |   |   |   |   |   |  |   |   |   |   |   |   |   |   |                                                                                                                                                                                                                                                                                                                                                                                                                                                                                                                                                                                                                                                                                                                                                                                                                                                                                                                                                                                                                                                                                                                                                                                                                                                                                                                                                                                                                                                                                                                                                                                                                                                                                                                                                                                                                                                                                                                                                                                                                                                                                                                                                                                                                                                                                                                                                                                                                                                                                                                                                                                                                                                                                                                                                                                                                                                                                                                                                                                                                                                                                                                                                                                                                                                                                                                                                                                                                                                                                                                                                                                                                                                                |         |  |  |  |  |  |  |  |      |  |   |     |     |     |     |     |     |   |       |   |   |   |   |   |   |   |  |    |   |   |   |   |   |   |   |  |   |   |   |   |   |   |   |   |  |   |   |   |   |   |   |   |   |  |   |   |   |   |   |   |   |   |  |   |   |   |   |   |   |   |   |  |   |   |   |   |   |   |   |   |  |   |   |   |   |   |   |   |   |  |   |   |   |   |   |   |   |   |  |   |   |   |   |   |   |   |   |  |   |   |   |   |   |   |   |   |  |   |   |   |   |   |   |   |   |  |   |   |   |   |   |   |   |   |   |       |   |   |   |   |   |   |   |  |     |   |   |   |   |   |   |   |  |    |   |   |   |   |   |   |   |  |    |   |   |   |   |   |   |   |  |    |   |   |   |   |   |   |   |  |    |   |   |   |   |   |   |   |  |    |   |   |   |   |   |   |   |  |   |   |   |   |   |   |   |   |  |   |   |   |   |   |   |   |   |  |   |   |   |   |   |   |   |   |  |   |   |   |   |   |   |   |   |  |   |   |   |   |   |   |   |   |  |   |   |   |   |   |   |   |   |  |   |   |   |   |   |   |   |   |  |   |   |   |   |   |   |   |   |  |   |   |   |   |   |   |   |   |  |   |   |   |   |   |   |   |   |  |   |   |   |   |   |   |   |   |  |   |   |   |   |   |   |   |   |   |     |   |   |   |   |   |   |   |  |   |   |   |   |   |   |   |   |                                                                                                                                                                                                                                                                                                                                                                                                                                                                                                                                                                                                                                                                                                                                                                                                                                                                                                                                                                                                                                                                                                                                                                                                                                                                                                                                                                                                                                                                                                                                                                                                                                                                                                                                                                                                                                                                                                                                                                                                                                                                                                                                                                                                                                                                                                                                                                                                                                                                                                                                                                                                                                                                                                                                                                                                                                                                                                                                                                                                                                                                                                                                                                                                                                                                                                                                                                                                                                                                                                                                                                                                                                                                                                                                                                  |         |  |  |  |  |  |  |  |      |  |   |     |     |     |     |     |     |       |       |   |   |   |   |   |   |   |  |     |   |   |   |   |   |   |   |  |     |   |   |   |   |   |   |   |  |     |   |   |   |   |   |   |   |  |    |   |   |   |   |   |   |   |  |    |   |   |   |   |   |   |   |  |    |   |   |   |   |   |   |   |  |    |   |   |   |   |   |   |   |  |    |   |   |   |   |   |   |   |  |    |   |   |   |   |   |   |   |  |   |   |   |   |   |   |   |   |  |   |   |   |   |   |   |   |   |  |   |   |   |   |   |   |   |   |  |   |   |   |   |   |   |   |   |  |   |   |   |   |   |   |   |   |  |   |   |   |   |   |   |   |   |  |   |   |   |   |   |   |   |   |  |   |   |   |   |   |   |   |   |  |   |   |   |   |   |   |   |   |  |   |   |   |   |   |   |   |   |  |   |   |   |   |   |   |   |   |  |   |   |   |   |   |   |   |   |  |   |   |   |   |   |   |   |   |  |   |   |   |   |   |   |   |   |  |   |   |   |   |   |   |   |   |  |   |   |   |   |   |   |   |   |  |   |   |   |   |   |   |   |   |  |   |   |   |   |   |   |   |   |  |   |   |   |   |   |   |   |   |  |   |   |   |   |   |   |   |   |  |   |   |   |   |   |   |   |   |  |   |   |   |   |   |   |   |   |  |   |   |   |   |   |   |   |   |  |   |   |   |   |   |   |   |   |  |   |   |   |   |   |   |   |   |
|         | 1                                                                                                                                                                                                                                                                                                                                                                                                                                                                                                                                                                                                                                                                                                                                                                                                                                                                                                                                                                                                                                                                                                                                                                                                                                                                                                                                                                                                                                                                                                        | A            | F   | S   | Y   | Q   | D   | A   |    |      |     |     |     |     |     |     |     |     |   |       |   |   |   |   |   |   |   |   |     |   |   |                                                                                                                                                                                                                                                                                                                                                                                                                                                                                                                                                                                                                                                                                |         |   |   |   |  |   |    |     |     |     |     |   |   |   |   |    |   |   |   |   |    |   |   |   |   |    |   |   |   |   |   |   |   |   |   |   |   |   |   |   |   |   |   |   |   |   |   |   |   |   |   |   |   |   |   |   |   |   |  |   |   |   |   |   |   |   |   |   |   |   |   |   |   |   |   |   |  |   |   |   |   |   |   |   |   |  |   |   |   |   |   |   |   |   |  |   |   |   |   |   |   |   |   |                                                                                                                                                                                                                                                                                                                                                                                                                                                                                                                                                                                                                                                                                                                                                                                                                                                                                                                                                                                                                                                                                                                                                                                                                                                                                                                                                                                                                                                                                                                                                                                                                                                                                                                                                                                                                                                                                                                                                                                                                                                                                                                                                                                                                                                                                                                                                                                                                                                                                                                                                                                                                                                                                                                                                                                                                                                                                                                                                                                                                                                                                                                                                                                                                                                                                                                                                                                                                                                                                                                                                                                                                                                                |         |  |  |  |  |  |  |  |      |  |   |     |     |     |     |     |     |   |       |   |   |   |   |   |   |   |  |    |   |   |   |   |   |   |   |  |   |   |   |   |   |   |   |   |  |   |   |   |   |   |   |   |   |  |   |   |   |   |   |   |   |   |  |   |   |   |   |   |   |   |   |  |   |   |   |   |   |   |   |   |  |   |   |   |   |   |   |   |   |  |   |   |   |   |   |   |   |   |  |   |   |   |   |   |   |   |   |  |   |   |   |   |   |   |   |   |  |   |   |   |   |   |   |   |   |  |   |   |   |   |   |   |   |   |   |       |   |   |   |   |   |   |   |  |     |   |   |   |   |   |   |   |  |    |   |   |   |   |   |   |   |  |    |   |   |   |   |   |   |   |  |    |   |   |   |   |   |   |   |  |    |   |   |   |   |   |   |   |  |    |   |   |   |   |   |   |   |  |   |   |   |   |   |   |   |   |  |   |   |   |   |   |   |   |   |  |   |   |   |   |   |   |   |   |  |   |   |   |   |   |   |   |   |  |   |   |   |   |   |   |   |   |  |   |   |   |   |   |   |   |   |  |   |   |   |   |   |   |   |   |  |   |   |   |   |   |   |   |   |  |   |   |   |   |   |   |   |   |  |   |   |   |   |   |   |   |   |  |   |   |   |   |   |   |   |   |  |   |   |   |   |   |   |   |   |   |     |   |   |   |   |   |   |   |  |   |   |   |   |   |   |   |   |                                                                                                                                                                                                                                                                                                                                                                                                                                                                                                                                                                                                                                                                                                                                                                                                                                                                                                                                                                                                                                                                                                                                                                                                                                                                                                                                                                                                                                                                                                                                                                                                                                                                                                                                                                                                                                                                                                                                                                                                                                                                                                                                                                                                                                                                                                                                                                                                                                                                                                                                                                                                                                                                                                                                                                                                                                                                                                                                                                                                                                                                                                                                                                                                                                                                                                                                                                                                                                                                                                                                                                                                                                                                                                                                                                  |         |  |  |  |  |  |  |  |      |  |   |     |     |     |     |     |     |       |       |   |   |   |   |   |   |   |  |     |   |   |   |   |   |   |   |  |     |   |   |   |   |   |   |   |  |     |   |   |   |   |   |   |   |  |    |   |   |   |   |   |   |   |  |    |   |   |   |   |   |   |   |  |    |   |   |   |   |   |   |   |  |    |   |   |   |   |   |   |   |  |    |   |   |   |   |   |   |   |  |    |   |   |   |   |   |   |   |  |   |   |   |   |   |   |   |   |  |   |   |   |   |   |   |   |   |  |   |   |   |   |   |   |   |   |  |   |   |   |   |   |   |   |   |  |   |   |   |   |   |   |   |   |  |   |   |   |   |   |   |   |   |  |   |   |   |   |   |   |   |   |  |   |   |   |   |   |   |   |   |  |   |   |   |   |   |   |   |   |  |   |   |   |   |   |   |   |   |  |   |   |   |   |   |   |   |   |  |   |   |   |   |   |   |   |   |  |   |   |   |   |   |   |   |   |  |   |   |   |   |   |   |   |   |  |   |   |   |   |   |   |   |   |  |   |   |   |   |   |   |   |   |  |   |   |   |   |   |   |   |   |  |   |   |   |   |   |   |   |   |  |   |   |   |   |   |   |   |   |  |   |   |   |   |   |   |   |   |  |   |   |   |   |   |   |   |   |  |   |   |   |   |   |   |   |   |  |   |   |   |   |   |   |   |   |  |   |   |   |   |   |   |   |   |  |   |   |   |   |   |   |   |   |
|         | 1                                                                                                                                                                                                                                                                                                                                                                                                                                                                                                                                                                                                                                                                                                                                                                                                                                                                                                                                                                                                                                                                                                                                                                                                                                                                                                                                                                                                                                                                                                        | G            | Y   | A   | I   | Q   | D   | A   |    |      |     |     |     |     |     |     |     |     |   |       |   |   |   |   |   |   |   |   |     |   |   |                                                                                                                                                                                                                                                                                                                                                                                                                                                                                                                                                                                                                                                                                |         |   |   |   |  |   |    |     |     |     |     |   |   |   |   |    |   |   |   |   |    |   |   |   |   |    |   |   |   |   |   |   |   |   |   |   |   |   |   |   |   |   |   |   |   |   |   |   |   |   |   |   |   |   |   |   |   |   |  |   |   |   |   |   |   |   |   |   |   |   |   |   |   |   |   |   |  |   |   |   |   |   |   |   |   |  |   |   |   |   |   |   |   |   |  |   |   |   |   |   |   |   |   |                                                                                                                                                                                                                                                                                                                                                                                                                                                                                                                                                                                                                                                                                                                                                                                                                                                                                                                                                                                                                                                                                                                                                                                                                                                                                                                                                                                                                                                                                                                                                                                                                                                                                                                                                                                                                                                                                                                                                                                                                                                                                                                                                                                                                                                                                                                                                                                                                                                                                                                                                                                                                                                                                                                                                                                                                                                                                                                                                                                                                                                                                                                                                                                                                                                                                                                                                                                                                                                                                                                                                                                                                                                                |         |  |  |  |  |  |  |  |      |  |   |     |     |     |     |     |     |   |       |   |   |   |   |   |   |   |  |    |   |   |   |   |   |   |   |  |   |   |   |   |   |   |   |   |  |   |   |   |   |   |   |   |   |  |   |   |   |   |   |   |   |   |  |   |   |   |   |   |   |   |   |  |   |   |   |   |   |   |   |   |  |   |   |   |   |   |   |   |   |  |   |   |   |   |   |   |   |   |  |   |   |   |   |   |   |   |   |  |   |   |   |   |   |   |   |   |  |   |   |   |   |   |   |   |   |  |   |   |   |   |   |   |   |   |   |       |   |   |   |   |   |   |   |  |     |   |   |   |   |   |   |   |  |    |   |   |   |   |   |   |   |  |    |   |   |   |   |   |   |   |  |    |   |   |   |   |   |   |   |  |    |   |   |   |   |   |   |   |  |    |   |   |   |   |   |   |   |  |   |   |   |   |   |   |   |   |  |   |   |   |   |   |   |   |   |  |   |   |   |   |   |   |   |   |  |   |   |   |   |   |   |   |   |  |   |   |   |   |   |   |   |   |  |   |   |   |   |   |   |   |   |  |   |   |   |   |   |   |   |   |  |   |   |   |   |   |   |   |   |  |   |   |   |   |   |   |   |   |  |   |   |   |   |   |   |   |   |  |   |   |   |   |   |   |   |   |  |   |   |   |   |   |   |   |   |   |     |   |   |   |   |   |   |   |  |   |   |   |   |   |   |   |   |                                                                                                                                                                                                                                                                                                                                                                                                                                                                                                                                                                                                                                                                                                                                                                                                                                                                                                                                                                                                                                                                                                                                                                                                                                                                                                                                                                                                                                                                                                                                                                                                                                                                                                                                                                                                                                                                                                                                                                                                                                                                                                                                                                                                                                                                                                                                                                                                                                                                                                                                                                                                                                                                                                                                                                                                                                                                                                                                                                                                                                                                                                                                                                                                                                                                                                                                                                                                                                                                                                                                                                                                                                                                                                                                                                  |         |  |  |  |  |  |  |  |      |  |   |     |     |     |     |     |     |       |       |   |   |   |   |   |   |   |  |     |   |   |   |   |   |   |   |  |     |   |   |   |   |   |   |   |  |     |   |   |   |   |   |   |   |  |    |   |   |   |   |   |   |   |  |    |   |   |   |   |   |   |   |  |    |   |   |   |   |   |   |   |  |    |   |   |   |   |   |   |   |  |    |   |   |   |   |   |   |   |  |    |   |   |   |   |   |   |   |  |   |   |   |   |   |   |   |   |  |   |   |   |   |   |   |   |   |  |   |   |   |   |   |   |   |   |  |   |   |   |   |   |   |   |   |  |   |   |   |   |   |   |   |   |  |   |   |   |   |   |   |   |   |  |   |   |   |   |   |   |   |   |  |   |   |   |   |   |   |   |   |  |   |   |   |   |   |   |   |   |  |   |   |   |   |   |   |   |   |  |   |   |   |   |   |   |   |   |  |   |   |   |   |   |   |   |   |  |   |   |   |   |   |   |   |   |  |   |   |   |   |   |   |   |   |  |   |   |   |   |   |   |   |   |  |   |   |   |   |   |   |   |   |  |   |   |   |   |   |   |   |   |  |   |   |   |   |   |   |   |   |  |   |   |   |   |   |   |   |   |  |   |   |   |   |   |   |   |   |  |   |   |   |   |   |   |   |   |  |   |   |   |   |   |   |   |   |  |   |   |   |   |   |   |   |   |  |   |   |   |   |   |   |   |   |  |   |   |   |   |   |   |   |   |
|         | 1                                                                                                                                                                                                                                                                                                                                                                                                                                                                                                                                                                                                                                                                                                                                                                                                                                                                                                                                                                                                                                                                                                                                                                                                                                                                                                                                                                                                                                                                                                        | A            | Y   | T   | I   | Q   | D   | T   |    |      |     |     |     |     |     |     |     |     |   |       |   |   |   |   |   |   |   |   |     |   |   |                                                                                                                                                                                                                                                                                                                                                                                                                                                                                                                                                                                                                                                                                |         |   |   |   |  |   |    |     |     |     |     |   |   |   |   |    |   |   |   |   |    |   |   |   |   |    |   |   |   |   |   |   |   |   |   |   |   |   |   |   |   |   |   |   |   |   |   |   |   |   |   |   |   |   |   |   |   |   |  |   |   |   |   |   |   |   |   |   |   |   |   |   |   |   |   |   |  |   |   |   |   |   |   |   |   |  |   |   |   |   |   |   |   |   |  |   |   |   |   |   |   |   |   |                                                                                                                                                                                                                                                                                                                                                                                                                                                                                                                                                                                                                                                                                                                                                                                                                                                                                                                                                                                                                                                                                                                                                                                                                                                                                                                                                                                                                                                                                                                                                                                                                                                                                                                                                                                                                                                                                                                                                                                                                                                                                                                                                                                                                                                                                                                                                                                                                                                                                                                                                                                                                                                                                                                                                                                                                                                                                                                                                                                                                                                                                                                                                                                                                                                                                                                                                                                                                                                                                                                                                                                                                                                                |         |  |  |  |  |  |  |  |      |  |   |     |     |     |     |     |     |   |       |   |   |   |   |   |   |   |  |    |   |   |   |   |   |   |   |  |   |   |   |   |   |   |   |   |  |   |   |   |   |   |   |   |   |  |   |   |   |   |   |   |   |   |  |   |   |   |   |   |   |   |   |  |   |   |   |   |   |   |   |   |  |   |   |   |   |   |   |   |   |  |   |   |   |   |   |   |   |   |  |   |   |   |   |   |   |   |   |  |   |   |   |   |   |   |   |   |  |   |   |   |   |   |   |   |   |  |   |   |   |   |   |   |   |   |   |       |   |   |   |   |   |   |   |  |     |   |   |   |   |   |   |   |  |    |   |   |   |   |   |   |   |  |    |   |   |   |   |   |   |   |  |    |   |   |   |   |   |   |   |  |    |   |   |   |   |   |   |   |  |    |   |   |   |   |   |   |   |  |   |   |   |   |   |   |   |   |  |   |   |   |   |   |   |   |   |  |   |   |   |   |   |   |   |   |  |   |   |   |   |   |   |   |   |  |   |   |   |   |   |   |   |   |  |   |   |   |   |   |   |   |   |  |   |   |   |   |   |   |   |   |  |   |   |   |   |   |   |   |   |  |   |   |   |   |   |   |   |   |  |   |   |   |   |   |   |   |   |  |   |   |   |   |   |   |   |   |  |   |   |   |   |   |   |   |   |   |     |   |   |   |   |   |   |   |  |   |   |   |   |   |   |   |   |                                                                                                                                                                                                                                                                                                                                                                                                                                                                                                                                                                                                                                                                                                                                                                                                                                                                                                                                                                                                                                                                                                                                                                                                                                                                                                                                                                                                                                                                                                                                                                                                                                                                                                                                                                                                                                                                                                                                                                                                                                                                                                                                                                                                                                                                                                                                                                                                                                                                                                                                                                                                                                                                                                                                                                                                                                                                                                                                                                                                                                                                                                                                                                                                                                                                                                                                                                                                                                                                                                                                                                                                                                                                                                                                                                  |         |  |  |  |  |  |  |  |      |  |   |     |     |     |     |     |     |       |       |   |   |   |   |   |   |   |  |     |   |   |   |   |   |   |   |  |     |   |   |   |   |   |   |   |  |     |   |   |   |   |   |   |   |  |    |   |   |   |   |   |   |   |  |    |   |   |   |   |   |   |   |  |    |   |   |   |   |   |   |   |  |    |   |   |   |   |   |   |   |  |    |   |   |   |   |   |   |   |  |    |   |   |   |   |   |   |   |  |   |   |   |   |   |   |   |   |  |   |   |   |   |   |   |   |   |  |   |   |   |   |   |   |   |   |  |   |   |   |   |   |   |   |   |  |   |   |   |   |   |   |   |   |  |   |   |   |   |   |   |   |   |  |   |   |   |   |   |   |   |   |  |   |   |   |   |   |   |   |   |  |   |   |   |   |   |   |   |   |  |   |   |   |   |   |   |   |   |  |   |   |   |   |   |   |   |   |  |   |   |   |   |   |   |   |   |  |   |   |   |   |   |   |   |   |  |   |   |   |   |   |   |   |   |  |   |   |   |   |   |   |   |   |  |   |   |   |   |   |   |   |   |  |   |   |   |   |   |   |   |   |  |   |   |   |   |   |   |   |   |  |   |   |   |   |   |   |   |   |  |   |   |   |   |   |   |   |   |  |   |   |   |   |   |   |   |   |  |   |   |   |   |   |   |   |   |  |   |   |   |   |   |   |   |   |  |   |   |   |   |   |   |   |   |  |   |   |   |   |   |   |   |   |
|         | 1                                                                                                                                                                                                                                                                                                                                                                                                                                                                                                                                                                                                                                                                                                                                                                                                                                                                                                                                                                                                                                                                                                                                                                                                                                                                                                                                                                                                                                                                                                        | A            | Y   | A   | N   | Q   | D   | T   |    |      |     |     |     |     |     |     |     |     |   |       |   |   |   |   |   |   |   |   |     |   |   |                                                                                                                                                                                                                                                                                                                                                                                                                                                                                                                                                                                                                                                                                |         |   |   |   |  |   |    |     |     |     |     |   |   |   |   |    |   |   |   |   |    |   |   |   |   |    |   |   |   |   |   |   |   |   |   |   |   |   |   |   |   |   |   |   |   |   |   |   |   |   |   |   |   |   |   |   |   |   |  |   |   |   |   |   |   |   |   |   |   |   |   |   |   |   |   |   |  |   |   |   |   |   |   |   |   |  |   |   |   |   |   |   |   |   |  |   |   |   |   |   |   |   |   |                                                                                                                                                                                                                                                                                                                                                                                                                                                                                                                                                                                                                                                                                                                                                                                                                                                                                                                                                                                                                                                                                                                                                                                                                                                                                                                                                                                                                                                                                                                                                                                                                                                                                                                                                                                                                                                                                                                                                                                                                                                                                                                                                                                                                                                                                                                                                                                                                                                                                                                                                                                                                                                                                                                                                                                                                                                                                                                                                                                                                                                                                                                                                                                                                                                                                                                                                                                                                                                                                                                                                                                                                                                                |         |  |  |  |  |  |  |  |      |  |   |     |     |     |     |     |     |   |       |   |   |   |   |   |   |   |  |    |   |   |   |   |   |   |   |  |   |   |   |   |   |   |   |   |  |   |   |   |   |   |   |   |   |  |   |   |   |   |   |   |   |   |  |   |   |   |   |   |   |   |   |  |   |   |   |   |   |   |   |   |  |   |   |   |   |   |   |   |   |  |   |   |   |   |   |   |   |   |  |   |   |   |   |   |   |   |   |  |   |   |   |   |   |   |   |   |  |   |   |   |   |   |   |   |   |  |   |   |   |   |   |   |   |   |   |       |   |   |   |   |   |   |   |  |     |   |   |   |   |   |   |   |  |    |   |   |   |   |   |   |   |  |    |   |   |   |   |   |   |   |  |    |   |   |   |   |   |   |   |  |    |   |   |   |   |   |   |   |  |    |   |   |   |   |   |   |   |  |   |   |   |   |   |   |   |   |  |   |   |   |   |   |   |   |   |  |   |   |   |   |   |   |   |   |  |   |   |   |   |   |   |   |   |  |   |   |   |   |   |   |   |   |  |   |   |   |   |   |   |   |   |  |   |   |   |   |   |   |   |   |  |   |   |   |   |   |   |   |   |  |   |   |   |   |   |   |   |   |  |   |   |   |   |   |   |   |   |  |   |   |   |   |   |   |   |   |  |   |   |   |   |   |   |   |   |   |     |   |   |   |   |   |   |   |  |   |   |   |   |   |   |   |   |                                                                                                                                                                                                                                                                                                                                                                                                                                                                                                                                                                                                                                                                                                                                                                                                                                                                                                                                                                                                                                                                                                                                                                                                                                                                                                                                                                                                                                                                                                                                                                                                                                                                                                                                                                                                                                                                                                                                                                                                                                                                                                                                                                                                                                                                                                                                                                                                                                                                                                                                                                                                                                                                                                                                                                                                                                                                                                                                                                                                                                                                                                                                                                                                                                                                                                                                                                                                                                                                                                                                                                                                                                                                                                                                                                  |         |  |  |  |  |  |  |  |      |  |   |     |     |     |     |     |     |       |       |   |   |   |   |   |   |   |  |     |   |   |   |   |   |   |   |  |     |   |   |   |   |   |   |   |  |     |   |   |   |   |   |   |   |  |    |   |   |   |   |   |   |   |  |    |   |   |   |   |   |   |   |  |    |   |   |   |   |   |   |   |  |    |   |   |   |   |   |   |   |  |    |   |   |   |   |   |   |   |  |    |   |   |   |   |   |   |   |  |   |   |   |   |   |   |   |   |  |   |   |   |   |   |   |   |   |  |   |   |   |   |   |   |   |   |  |   |   |   |   |   |   |   |   |  |   |   |   |   |   |   |   |   |  |   |   |   |   |   |   |   |   |  |   |   |   |   |   |   |   |   |  |   |   |   |   |   |   |   |   |  |   |   |   |   |   |   |   |   |  |   |   |   |   |   |   |   |   |  |   |   |   |   |   |   |   |   |  |   |   |   |   |   |   |   |   |  |   |   |   |   |   |   |   |   |  |   |   |   |   |   |   |   |   |  |   |   |   |   |   |   |   |   |  |   |   |   |   |   |   |   |   |  |   |   |   |   |   |   |   |   |  |   |   |   |   |   |   |   |   |  |   |   |   |   |   |   |   |   |  |   |   |   |   |   |   |   |   |  |   |   |   |   |   |   |   |   |  |   |   |   |   |   |   |   |   |  |   |   |   |   |   |   |   |   |  |   |   |   |   |   |   |   |   |  |   |   |   |   |   |   |   |   |
|         | 1                                                                                                                                                                                                                                                                                                                                                                                                                                                                                                                                                                                                                                                                                                                                                                                                                                                                                                                                                                                                                                                                                                                                                                                                                                                                                                                                                                                                                                                                                                        | A            | Y   | A   | Y   | Q   | D   | A   |    |      |     |     |     |     |     |     |     |     |   |       |   |   |   |   |   |   |   |   |     |   |   |                                                                                                                                                                                                                                                                                                                                                                                                                                                                                                                                                                                                                                                                                |         |   |   |   |  |   |    |     |     |     |     |   |   |   |   |    |   |   |   |   |    |   |   |   |   |    |   |   |   |   |   |   |   |   |   |   |   |   |   |   |   |   |   |   |   |   |   |   |   |   |   |   |   |   |   |   |   |   |  |   |   |   |   |   |   |   |   |   |   |   |   |   |   |   |   |   |  |   |   |   |   |   |   |   |   |  |   |   |   |   |   |   |   |   |  |   |   |   |   |   |   |   |   |                                                                                                                                                                                                                                                                                                                                                                                                                                                                                                                                                                                                                                                                                                                                                                                                                                                                                                                                                                                                                                                                                                                                                                                                                                                                                                                                                                                                                                                                                                                                                                                                                                                                                                                                                                                                                                                                                                                                                                                                                                                                                                                                                                                                                                                                                                                                                                                                                                                                                                                                                                                                                                                                                                                                                                                                                                                                                                                                                                                                                                                                                                                                                                                                                                                                                                                                                                                                                                                                                                                                                                                                                                                                |         |  |  |  |  |  |  |  |      |  |   |     |     |     |     |     |     |   |       |   |   |   |   |   |   |   |  |    |   |   |   |   |   |   |   |  |   |   |   |   |   |   |   |   |  |   |   |   |   |   |   |   |   |  |   |   |   |   |   |   |   |   |  |   |   |   |   |   |   |   |   |  |   |   |   |   |   |   |   |   |  |   |   |   |   |   |   |   |   |  |   |   |   |   |   |   |   |   |  |   |   |   |   |   |   |   |   |  |   |   |   |   |   |   |   |   |  |   |   |   |   |   |   |   |   |  |   |   |   |   |   |   |   |   |   |       |   |   |   |   |   |   |   |  |     |   |   |   |   |   |   |   |  |    |   |   |   |   |   |   |   |  |    |   |   |   |   |   |   |   |  |    |   |   |   |   |   |   |   |  |    |   |   |   |   |   |   |   |  |    |   |   |   |   |   |   |   |  |   |   |   |   |   |   |   |   |  |   |   |   |   |   |   |   |   |  |   |   |   |   |   |   |   |   |  |   |   |   |   |   |   |   |   |  |   |   |   |   |   |   |   |   |  |   |   |   |   |   |   |   |   |  |   |   |   |   |   |   |   |   |  |   |   |   |   |   |   |   |   |  |   |   |   |   |   |   |   |   |  |   |   |   |   |   |   |   |   |  |   |   |   |   |   |   |   |   |  |   |   |   |   |   |   |   |   |   |     |   |   |   |   |   |   |   |  |   |   |   |   |   |   |   |   |                                                                                                                                                                                                                                                                                                                                                                                                                                                                                                                                                                                                                                                                                                                                                                                                                                                                                                                                                                                                                                                                                                                                                                                                                                                                                                                                                                                                                                                                                                                                                                                                                                                                                                                                                                                                                                                                                                                                                                                                                                                                                                                                                                                                                                                                                                                                                                                                                                                                                                                                                                                                                                                                                                                                                                                                                                                                                                                                                                                                                                                                                                                                                                                                                                                                                                                                                                                                                                                                                                                                                                                                                                                                                                                                                                  |         |  |  |  |  |  |  |  |      |  |   |     |     |     |     |     |     |       |       |   |   |   |   |   |   |   |  |     |   |   |   |   |   |   |   |  |     |   |   |   |   |   |   |   |  |     |   |   |   |   |   |   |   |  |    |   |   |   |   |   |   |   |  |    |   |   |   |   |   |   |   |  |    |   |   |   |   |   |   |   |  |    |   |   |   |   |   |   |   |  |    |   |   |   |   |   |   |   |  |    |   |   |   |   |   |   |   |  |   |   |   |   |   |   |   |   |  |   |   |   |   |   |   |   |   |  |   |   |   |   |   |   |   |   |  |   |   |   |   |   |   |   |   |  |   |   |   |   |   |   |   |   |  |   |   |   |   |   |   |   |   |  |   |   |   |   |   |   |   |   |  |   |   |   |   |   |   |   |   |  |   |   |   |   |   |   |   |   |  |   |   |   |   |   |   |   |   |  |   |   |   |   |   |   |   |   |  |   |   |   |   |   |   |   |   |  |   |   |   |   |   |   |   |   |  |   |   |   |   |   |   |   |   |  |   |   |   |   |   |   |   |   |  |   |   |   |   |   |   |   |   |  |   |   |   |   |   |   |   |   |  |   |   |   |   |   |   |   |   |  |   |   |   |   |   |   |   |   |  |   |   |   |   |   |   |   |   |  |   |   |   |   |   |   |   |   |  |   |   |   |   |   |   |   |   |  |   |   |   |   |   |   |   |   |  |   |   |   |   |   |   |   |   |  |   |   |   |   |   |   |   |   |
| ?       | N 7                                                                                                                                                                                                                                                                                                                                                                                                                                                                                                                                                                                                                                                                                                                                                                                                                                                                                                                                                                                                                                                                                                                                                                                                                                                                                                                                                                                                                                                                                                      | A            | F   | S   | Y   | Q   | K   | T   |    |      |     |     |     |     |     |     |     |     |   |       |   |   |   |   |   |   |   |   |     |   |   |                                                                                                                                                                                                                                                                                                                                                                                                                                                                                                                                                                                                                                                                                |         |   |   |   |  |   |    |     |     |     |     |   |   |   |   |    |   |   |   |   |    |   |   |   |   |    |   |   |   |   |   |   |   |   |   |   |   |   |   |   |   |   |   |   |   |   |   |   |   |   |   |   |   |   |   |   |   |   |  |   |   |   |   |   |   |   |   |   |   |   |   |   |   |   |   |   |  |   |   |   |   |   |   |   |   |  |   |   |   |   |   |   |   |   |  |   |   |   |   |   |   |   |   |                                                                                                                                                                                                                                                                                                                                                                                                                                                                                                                                                                                                                                                                                                                                                                                                                                                                                                                                                                                                                                                                                                                                                                                                                                                                                                                                                                                                                                                                                                                                                                                                                                                                                                                                                                                                                                                                                                                                                                                                                                                                                                                                                                                                                                                                                                                                                                                                                                                                                                                                                                                                                                                                                                                                                                                                                                                                                                                                                                                                                                                                                                                                                                                                                                                                                                                                                                                                                                                                                                                                                                                                                                                                |         |  |  |  |  |  |  |  |      |  |   |     |     |     |     |     |     |   |       |   |   |   |   |   |   |   |  |    |   |   |   |   |   |   |   |  |   |   |   |   |   |   |   |   |  |   |   |   |   |   |   |   |   |  |   |   |   |   |   |   |   |   |  |   |   |   |   |   |   |   |   |  |   |   |   |   |   |   |   |   |  |   |   |   |   |   |   |   |   |  |   |   |   |   |   |   |   |   |  |   |   |   |   |   |   |   |   |  |   |   |   |   |   |   |   |   |  |   |   |   |   |   |   |   |   |  |   |   |   |   |   |   |   |   |   |       |   |   |   |   |   |   |   |  |     |   |   |   |   |   |   |   |  |    |   |   |   |   |   |   |   |  |    |   |   |   |   |   |   |   |  |    |   |   |   |   |   |   |   |  |    |   |   |   |   |   |   |   |  |    |   |   |   |   |   |   |   |  |   |   |   |   |   |   |   |   |  |   |   |   |   |   |   |   |   |  |   |   |   |   |   |   |   |   |  |   |   |   |   |   |   |   |   |  |   |   |   |   |   |   |   |   |  |   |   |   |   |   |   |   |   |  |   |   |   |   |   |   |   |   |  |   |   |   |   |   |   |   |   |  |   |   |   |   |   |   |   |   |  |   |   |   |   |   |   |   |   |  |   |   |   |   |   |   |   |   |  |   |   |   |   |   |   |   |   |   |     |   |   |   |   |   |   |   |  |   |   |   |   |   |   |   |   |                                                                                                                                                                                                                                                                                                                                                                                                                                                                                                                                                                                                                                                                                                                                                                                                                                                                                                                                                                                                                                                                                                                                                                                                                                                                                                                                                                                                                                                                                                                                                                                                                                                                                                                                                                                                                                                                                                                                                                                                                                                                                                                                                                                                                                                                                                                                                                                                                                                                                                                                                                                                                                                                                                                                                                                                                                                                                                                                                                                                                                                                                                                                                                                                                                                                                                                                                                                                                                                                                                                                                                                                                                                                                                                                                                  |         |  |  |  |  |  |  |  |      |  |   |     |     |     |     |     |     |       |       |   |   |   |   |   |   |   |  |     |   |   |   |   |   |   |   |  |     |   |   |   |   |   |   |   |  |     |   |   |   |   |   |   |   |  |    |   |   |   |   |   |   |   |  |    |   |   |   |   |   |   |   |  |    |   |   |   |   |   |   |   |  |    |   |   |   |   |   |   |   |  |    |   |   |   |   |   |   |   |  |    |   |   |   |   |   |   |   |  |   |   |   |   |   |   |   |   |  |   |   |   |   |   |   |   |   |  |   |   |   |   |   |   |   |   |  |   |   |   |   |   |   |   |   |  |   |   |   |   |   |   |   |   |  |   |   |   |   |   |   |   |   |  |   |   |   |   |   |   |   |   |  |   |   |   |   |   |   |   |   |  |   |   |   |   |   |   |   |   |  |   |   |   |   |   |   |   |   |  |   |   |   |   |   |   |   |   |  |   |   |   |   |   |   |   |   |  |   |   |   |   |   |   |   |   |  |   |   |   |   |   |   |   |   |  |   |   |   |   |   |   |   |   |  |   |   |   |   |   |   |   |   |  |   |   |   |   |   |   |   |   |  |   |   |   |   |   |   |   |   |  |   |   |   |   |   |   |   |   |  |   |   |   |   |   |   |   |   |  |   |   |   |   |   |   |   |   |  |   |   |   |   |   |   |   |   |  |   |   |   |   |   |   |   |   |  |   |   |   |   |   |   |   |   |  |   |   |   |   |   |   |   |   |
|         | 5                                                                                                                                                                                                                                                                                                                                                                                                                                                                                                                                                                                                                                                                                                                                                                                                                                                                                                                                                                                                                                                                                                                                                                                                                                                                                                                                                                                                                                                                                                        | T            | F   | S   | Y   | Q   | K   | T   |    |      |     |     |     |     |     |     |     |     |   |       |   |   |   |   |   |   |   |   |     |   |   |                                                                                                                                                                                                                                                                                                                                                                                                                                                                                                                                                                                                                                                                                |         |   |   |   |  |   |    |     |     |     |     |   |   |   |   |    |   |   |   |   |    |   |   |   |   |    |   |   |   |   |   |   |   |   |   |   |   |   |   |   |   |   |   |   |   |   |   |   |   |   |   |   |   |   |   |   |   |   |  |   |   |   |   |   |   |   |   |   |   |   |   |   |   |   |   |   |  |   |   |   |   |   |   |   |   |  |   |   |   |   |   |   |   |   |  |   |   |   |   |   |   |   |   |                                                                                                                                                                                                                                                                                                                                                                                                                                                                                                                                                                                                                                                                                                                                                                                                                                                                                                                                                                                                                                                                                                                                                                                                                                                                                                                                                                                                                                                                                                                                                                                                                                                                                                                                                                                                                                                                                                                                                                                                                                                                                                                                                                                                                                                                                                                                                                                                                                                                                                                                                                                                                                                                                                                                                                                                                                                                                                                                                                                                                                                                                                                                                                                                                                                                                                                                                                                                                                                                                                                                                                                                                                                                |         |  |  |  |  |  |  |  |      |  |   |     |     |     |     |     |     |   |       |   |   |   |   |   |   |   |  |    |   |   |   |   |   |   |   |  |   |   |   |   |   |   |   |   |  |   |   |   |   |   |   |   |   |  |   |   |   |   |   |   |   |   |  |   |   |   |   |   |   |   |   |  |   |   |   |   |   |   |   |   |  |   |   |   |   |   |   |   |   |  |   |   |   |   |   |   |   |   |  |   |   |   |   |   |   |   |   |  |   |   |   |   |   |   |   |   |  |   |   |   |   |   |   |   |   |  |   |   |   |   |   |   |   |   |   |       |   |   |   |   |   |   |   |  |     |   |   |   |   |   |   |   |  |    |   |   |   |   |   |   |   |  |    |   |   |   |   |   |   |   |  |    |   |   |   |   |   |   |   |  |    |   |   |   |   |   |   |   |  |    |   |   |   |   |   |   |   |  |   |   |   |   |   |   |   |   |  |   |   |   |   |   |   |   |   |  |   |   |   |   |   |   |   |   |  |   |   |   |   |   |   |   |   |  |   |   |   |   |   |   |   |   |  |   |   |   |   |   |   |   |   |  |   |   |   |   |   |   |   |   |  |   |   |   |   |   |   |   |   |  |   |   |   |   |   |   |   |   |  |   |   |   |   |   |   |   |   |  |   |   |   |   |   |   |   |   |  |   |   |   |   |   |   |   |   |   |     |   |   |   |   |   |   |   |  |   |   |   |   |   |   |   |   |                                                                                                                                                                                                                                                                                                                                                                                                                                                                                                                                                                                                                                                                                                                                                                                                                                                                                                                                                                                                                                                                                                                                                                                                                                                                                                                                                                                                                                                                                                                                                                                                                                                                                                                                                                                                                                                                                                                                                                                                                                                                                                                                                                                                                                                                                                                                                                                                                                                                                                                                                                                                                                                                                                                                                                                                                                                                                                                                                                                                                                                                                                                                                                                                                                                                                                                                                                                                                                                                                                                                                                                                                                                                                                                                                                  |         |  |  |  |  |  |  |  |      |  |   |     |     |     |     |     |     |       |       |   |   |   |   |   |   |   |  |     |   |   |   |   |   |   |   |  |     |   |   |   |   |   |   |   |  |     |   |   |   |   |   |   |   |  |    |   |   |   |   |   |   |   |  |    |   |   |   |   |   |   |   |  |    |   |   |   |   |   |   |   |  |    |   |   |   |   |   |   |   |  |    |   |   |   |   |   |   |   |  |    |   |   |   |   |   |   |   |  |   |   |   |   |   |   |   |   |  |   |   |   |   |   |   |   |   |  |   |   |   |   |   |   |   |   |  |   |   |   |   |   |   |   |   |  |   |   |   |   |   |   |   |   |  |   |   |   |   |   |   |   |   |  |   |   |   |   |   |   |   |   |  |   |   |   |   |   |   |   |   |  |   |   |   |   |   |   |   |   |  |   |   |   |   |   |   |   |   |  |   |   |   |   |   |   |   |   |  |   |   |   |   |   |   |   |   |  |   |   |   |   |   |   |   |   |  |   |   |   |   |   |   |   |   |  |   |   |   |   |   |   |   |   |  |   |   |   |   |   |   |   |   |  |   |   |   |   |   |   |   |   |  |   |   |   |   |   |   |   |   |  |   |   |   |   |   |   |   |   |  |   |   |   |   |   |   |   |   |  |   |   |   |   |   |   |   |   |  |   |   |   |   |   |   |   |   |  |   |   |   |   |   |   |   |   |  |   |   |   |   |   |   |   |   |  |   |   |   |   |   |   |   |   |
| Residue |                                                                                                                                                                                                                                                                                                                                                                                                                                                                                                                                                                                                                                                                                                                                                                                                                                                                                                                                                                                                                                                                                                                                                                                                                                                                                                                                                                                                                                                                                                          |              |     |     |     |     |     |     |    |      |     |     |     |     |     |     |     |     |   |       |   |   |   |   |   |   |   |   |     |   |   |                                                                                                                                                                                                                                                                                                                                                                                                                                                                                                                                                                                                                                                                                |         |   |   |   |  |   |    |     |     |     |     |   |   |   |   |    |   |   |   |   |    |   |   |   |   |    |   |   |   |   |   |   |   |   |   |   |   |   |   |   |   |   |   |   |   |   |   |   |   |   |   |   |   |   |   |   |   |   |  |   |   |   |   |   |   |   |   |   |   |   |   |   |   |   |   |   |  |   |   |   |   |   |   |   |   |  |   |   |   |   |   |   |   |   |  |   |   |   |   |   |   |   |   |                                                                                                                                                                                                                                                                                                                                                                                                                                                                                                                                                                                                                                                                                                                                                                                                                                                                                                                                                                                                                                                                                                                                                                                                                                                                                                                                                                                                                                                                                                                                                                                                                                                                                                                                                                                                                                                                                                                                                                                                                                                                                                                                                                                                                                                                                                                                                                                                                                                                                                                                                                                                                                                                                                                                                                                                                                                                                                                                                                                                                                                                                                                                                                                                                                                                                                                                                                                                                                                                                                                                                                                                                                                                |         |  |  |  |  |  |  |  |      |  |   |     |     |     |     |     |     |   |       |   |   |   |   |   |   |   |  |    |   |   |   |   |   |   |   |  |   |   |   |   |   |   |   |   |  |   |   |   |   |   |   |   |   |  |   |   |   |   |   |   |   |   |  |   |   |   |   |   |   |   |   |  |   |   |   |   |   |   |   |   |  |   |   |   |   |   |   |   |   |  |   |   |   |   |   |   |   |   |  |   |   |   |   |   |   |   |   |  |   |   |   |   |   |   |   |   |  |   |   |   |   |   |   |   |   |  |   |   |   |   |   |   |   |   |   |       |   |   |   |   |   |   |   |  |     |   |   |   |   |   |   |   |  |    |   |   |   |   |   |   |   |  |    |   |   |   |   |   |   |   |  |    |   |   |   |   |   |   |   |  |    |   |   |   |   |   |   |   |  |    |   |   |   |   |   |   |   |  |   |   |   |   |   |   |   |   |  |   |   |   |   |   |   |   |   |  |   |   |   |   |   |   |   |   |  |   |   |   |   |   |   |   |   |  |   |   |   |   |   |   |   |   |  |   |   |   |   |   |   |   |   |  |   |   |   |   |   |   |   |   |  |   |   |   |   |   |   |   |   |  |   |   |   |   |   |   |   |   |  |   |   |   |   |   |   |   |   |  |   |   |   |   |   |   |   |   |  |   |   |   |   |   |   |   |   |   |     |   |   |   |   |   |   |   |  |   |   |   |   |   |   |   |   |                                                                                                                                                                                                                                                                                                                                                                                                                                                                                                                                                                                                                                                                                                                                                                                                                                                                                                                                                                                                                                                                                                                                                                                                                                                                                                                                                                                                                                                                                                                                                                                                                                                                                                                                                                                                                                                                                                                                                                                                                                                                                                                                                                                                                                                                                                                                                                                                                                                                                                                                                                                                                                                                                                                                                                                                                                                                                                                                                                                                                                                                                                                                                                                                                                                                                                                                                                                                                                                                                                                                                                                                                                                                                                                                                                  |         |  |  |  |  |  |  |  |      |  |   |     |     |     |     |     |     |       |       |   |   |   |   |   |   |   |  |     |   |   |   |   |   |   |   |  |     |   |   |   |   |   |   |   |  |     |   |   |   |   |   |   |   |  |    |   |   |   |   |   |   |   |  |    |   |   |   |   |   |   |   |  |    |   |   |   |   |   |   |   |  |    |   |   |   |   |   |   |   |  |    |   |   |   |   |   |   |   |  |    |   |   |   |   |   |   |   |  |   |   |   |   |   |   |   |   |  |   |   |   |   |   |   |   |   |  |   |   |   |   |   |   |   |   |  |   |   |   |   |   |   |   |   |  |   |   |   |   |   |   |   |   |  |   |   |   |   |   |   |   |   |  |   |   |   |   |   |   |   |   |  |   |   |   |   |   |   |   |   |  |   |   |   |   |   |   |   |   |  |   |   |   |   |   |   |   |   |  |   |   |   |   |   |   |   |   |  |   |   |   |   |   |   |   |   |  |   |   |   |   |   |   |   |   |  |   |   |   |   |   |   |   |   |  |   |   |   |   |   |   |   |   |  |   |   |   |   |   |   |   |   |  |   |   |   |   |   |   |   |   |  |   |   |   |   |   |   |   |   |  |   |   |   |   |   |   |   |   |  |   |   |   |   |   |   |   |   |  |   |   |   |   |   |   |   |   |  |   |   |   |   |   |   |   |   |  |   |   |   |   |   |   |   |   |  |   |   |   |   |   |   |   |   |  |   |   |   |   |   |   |   |   |
| Type    |                                                                                                                                                                                                                                                                                                                                                                                                                                                                                                                                                                                                                                                                                                                                                                                                                                                                                                                                                                                                                                                                                                                                                                                                                                                                                                                                                                                                                                                                                                          | 5            | 267 | 297 | 324 | 370 | 426 | 440 |    |      |     |     |     |     |     |     |     |     |   |       |   |   |   |   |   |   |   |   |     |   |   |                                                                                                                                                                                                                                                                                                                                                                                                                                                                                                                                                                                                                                                                                |         |   |   |   |  |   |    |     |     |     |     |   |   |   |   |    |   |   |   |   |    |   |   |   |   |    |   |   |   |   |   |   |   |   |   |   |   |   |   |   |   |   |   |   |   |   |   |   |   |   |   |   |   |   |   |   |   |   |  |   |   |   |   |   |   |   |   |   |   |   |   |   |   |   |   |   |  |   |   |   |   |   |   |   |   |  |   |   |   |   |   |   |   |   |  |   |   |   |   |   |   |   |   |                                                                                                                                                                                                                                                                                                                                                                                                                                                                                                                                                                                                                                                                                                                                                                                                                                                                                                                                                                                                                                                                                                                                                                                                                                                                                                                                                                                                                                                                                                                                                                                                                                                                                                                                                                                                                                                                                                                                                                                                                                                                                                                                                                                                                                                                                                                                                                                                                                                                                                                                                                                                                                                                                                                                                                                                                                                                                                                                                                                                                                                                                                                                                                                                                                                                                                                                                                                                                                                                                                                                                                                                                                                                |         |  |  |  |  |  |  |  |      |  |   |     |     |     |     |     |     |   |       |   |   |   |   |   |   |   |  |    |   |   |   |   |   |   |   |  |   |   |   |   |   |   |   |   |  |   |   |   |   |   |   |   |   |  |   |   |   |   |   |   |   |   |  |   |   |   |   |   |   |   |   |  |   |   |   |   |   |   |   |   |  |   |   |   |   |   |   |   |   |  |   |   |   |   |   |   |   |   |  |   |   |   |   |   |   |   |   |  |   |   |   |   |   |   |   |   |  |   |   |   |   |   |   |   |   |  |   |   |   |   |   |   |   |   |   |       |   |   |   |   |   |   |   |  |     |   |   |   |   |   |   |   |  |    |   |   |   |   |   |   |   |  |    |   |   |   |   |   |   |   |  |    |   |   |   |   |   |   |   |  |    |   |   |   |   |   |   |   |  |    |   |   |   |   |   |   |   |  |   |   |   |   |   |   |   |   |  |   |   |   |   |   |   |   |   |  |   |   |   |   |   |   |   |   |  |   |   |   |   |   |   |   |   |  |   |   |   |   |   |   |   |   |  |   |   |   |   |   |   |   |   |  |   |   |   |   |   |   |   |   |  |   |   |   |   |   |   |   |   |  |   |   |   |   |   |   |   |   |  |   |   |   |   |   |   |   |   |  |   |   |   |   |   |   |   |   |  |   |   |   |   |   |   |   |   |   |     |   |   |   |   |   |   |   |  |   |   |   |   |   |   |   |   |                                                                                                                                                                                                                                                                                                                                                                                                                                                                                                                                                                                                                                                                                                                                                                                                                                                                                                                                                                                                                                                                                                                                                                                                                                                                                                                                                                                                                                                                                                                                                                                                                                                                                                                                                                                                                                                                                                                                                                                                                                                                                                                                                                                                                                                                                                                                                                                                                                                                                                                                                                                                                                                                                                                                                                                                                                                                                                                                                                                                                                                                                                                                                                                                                                                                                                                                                                                                                                                                                                                                                                                                                                                                                                                                                                  |         |  |  |  |  |  |  |  |      |  |   |     |     |     |     |     |     |       |       |   |   |   |   |   |   |   |  |     |   |   |   |   |   |   |   |  |     |   |   |   |   |   |   |   |  |     |   |   |   |   |   |   |   |  |    |   |   |   |   |   |   |   |  |    |   |   |   |   |   |   |   |  |    |   |   |   |   |   |   |   |  |    |   |   |   |   |   |   |   |  |    |   |   |   |   |   |   |   |  |    |   |   |   |   |   |   |   |  |   |   |   |   |   |   |   |   |  |   |   |   |   |   |   |   |   |  |   |   |   |   |   |   |   |   |  |   |   |   |   |   |   |   |   |  |   |   |   |   |   |   |   |   |  |   |   |   |   |   |   |   |   |  |   |   |   |   |   |   |   |   |  |   |   |   |   |   |   |   |   |  |   |   |   |   |   |   |   |   |  |   |   |   |   |   |   |   |   |  |   |   |   |   |   |   |   |   |  |   |   |   |   |   |   |   |   |  |   |   |   |   |   |   |   |   |  |   |   |   |   |   |   |   |   |  |   |   |   |   |   |   |   |   |  |   |   |   |   |   |   |   |   |  |   |   |   |   |   |   |   |   |  |   |   |   |   |   |   |   |   |  |   |   |   |   |   |   |   |   |  |   |   |   |   |   |   |   |   |  |   |   |   |   |   |   |   |   |  |   |   |   |   |   |   |   |   |  |   |   |   |   |   |   |   |   |  |   |   |   |   |   |   |   |   |  |   |   |   |   |   |   |   |   |
| a/FPV   | N 846                                                                                                                                                                                                                                                                                                                                                                                                                                                                                                                                                                                                                                                                                                                                                                                                                                                                                                                                                                                                                                                                                                                                                                                                                                                                                                                                                                                                                                                                                                    | A            | F   | S   | Y   | Q   | N   | T   |    |      |     |     |     |     |     |     |     |     |   |       |   |   |   |   |   |   |   |   |     |   |   |                                                                                                                                                                                                                                                                                                                                                                                                                                                                                                                                                                                                                                                                                |         |   |   |   |  |   |    |     |     |     |     |   |   |   |   |    |   |   |   |   |    |   |   |   |   |    |   |   |   |   |   |   |   |   |   |   |   |   |   |   |   |   |   |   |   |   |   |   |   |   |   |   |   |   |   |   |   |   |  |   |   |   |   |   |   |   |   |   |   |   |   |   |   |   |   |   |  |   |   |   |   |   |   |   |   |  |   |   |   |   |   |   |   |   |  |   |   |   |   |   |   |   |   |                                                                                                                                                                                                                                                                                                                                                                                                                                                                                                                                                                                                                                                                                                                                                                                                                                                                                                                                                                                                                                                                                                                                                                                                                                                                                                                                                                                                                                                                                                                                                                                                                                                                                                                                                                                                                                                                                                                                                                                                                                                                                                                                                                                                                                                                                                                                                                                                                                                                                                                                                                                                                                                                                                                                                                                                                                                                                                                                                                                                                                                                                                                                                                                                                                                                                                                                                                                                                                                                                                                                                                                                                                                                |         |  |  |  |  |  |  |  |      |  |   |     |     |     |     |     |     |   |       |   |   |   |   |   |   |   |  |    |   |   |   |   |   |   |   |  |   |   |   |   |   |   |   |   |  |   |   |   |   |   |   |   |   |  |   |   |   |   |   |   |   |   |  |   |   |   |   |   |   |   |   |  |   |   |   |   |   |   |   |   |  |   |   |   |   |   |   |   |   |  |   |   |   |   |   |   |   |   |  |   |   |   |   |   |   |   |   |  |   |   |   |   |   |   |   |   |  |   |   |   |   |   |   |   |   |  |   |   |   |   |   |   |   |   |   |       |   |   |   |   |   |   |   |  |     |   |   |   |   |   |   |   |  |    |   |   |   |   |   |   |   |  |    |   |   |   |   |   |   |   |  |    |   |   |   |   |   |   |   |  |    |   |   |   |   |   |   |   |  |    |   |   |   |   |   |   |   |  |   |   |   |   |   |   |   |   |  |   |   |   |   |   |   |   |   |  |   |   |   |   |   |   |   |   |  |   |   |   |   |   |   |   |   |  |   |   |   |   |   |   |   |   |  |   |   |   |   |   |   |   |   |  |   |   |   |   |   |   |   |   |  |   |   |   |   |   |   |   |   |  |   |   |   |   |   |   |   |   |  |   |   |   |   |   |   |   |   |  |   |   |   |   |   |   |   |   |  |   |   |   |   |   |   |   |   |   |     |   |   |   |   |   |   |   |  |   |   |   |   |   |   |   |   |                                                                                                                                                                                                                                                                                                                                                                                                                                                                                                                                                                                                                                                                                                                                                                                                                                                                                                                                                                                                                                                                                                                                                                                                                                                                                                                                                                                                                                                                                                                                                                                                                                                                                                                                                                                                                                                                                                                                                                                                                                                                                                                                                                                                                                                                                                                                                                                                                                                                                                                                                                                                                                                                                                                                                                                                                                                                                                                                                                                                                                                                                                                                                                                                                                                                                                                                                                                                                                                                                                                                                                                                                                                                                                                                                                  |         |  |  |  |  |  |  |  |      |  |   |     |     |     |     |     |     |       |       |   |   |   |   |   |   |   |  |     |   |   |   |   |   |   |   |  |     |   |   |   |   |   |   |   |  |     |   |   |   |   |   |   |   |  |    |   |   |   |   |   |   |   |  |    |   |   |   |   |   |   |   |  |    |   |   |   |   |   |   |   |  |    |   |   |   |   |   |   |   |  |    |   |   |   |   |   |   |   |  |    |   |   |   |   |   |   |   |  |   |   |   |   |   |   |   |   |  |   |   |   |   |   |   |   |   |  |   |   |   |   |   |   |   |   |  |   |   |   |   |   |   |   |   |  |   |   |   |   |   |   |   |   |  |   |   |   |   |   |   |   |   |  |   |   |   |   |   |   |   |   |  |   |   |   |   |   |   |   |   |  |   |   |   |   |   |   |   |   |  |   |   |   |   |   |   |   |   |  |   |   |   |   |   |   |   |   |  |   |   |   |   |   |   |   |   |  |   |   |   |   |   |   |   |   |  |   |   |   |   |   |   |   |   |  |   |   |   |   |   |   |   |   |  |   |   |   |   |   |   |   |   |  |   |   |   |   |   |   |   |   |  |   |   |   |   |   |   |   |   |  |   |   |   |   |   |   |   |   |  |   |   |   |   |   |   |   |   |  |   |   |   |   |   |   |   |   |  |   |   |   |   |   |   |   |   |  |   |   |   |   |   |   |   |   |  |   |   |   |   |   |   |   |   |  |   |   |   |   |   |   |   |   |
|         | 591                                                                                                                                                                                                                                                                                                                                                                                                                                                                                                                                                                                                                                                                                                                                                                                                                                                                                                                                                                                                                                                                                                                                                                                                                                                                                                                                                                                                                                                                                                      | A            | Y   | A   | I   | Q   | N   | A   |    |      |     |     |     |     |     |     |     |     |   |       |   |   |   |   |   |   |   |   |     |   |   |                                                                                                                                                                                                                                                                                                                                                                                                                                                                                                                                                                                                                                                                                |         |   |   |   |  |   |    |     |     |     |     |   |   |   |   |    |   |   |   |   |    |   |   |   |   |    |   |   |   |   |   |   |   |   |   |   |   |   |   |   |   |   |   |   |   |   |   |   |   |   |   |   |   |   |   |   |   |   |  |   |   |   |   |   |   |   |   |   |   |   |   |   |   |   |   |   |  |   |   |   |   |   |   |   |   |  |   |   |   |   |   |   |   |   |  |   |   |   |   |   |   |   |   |                                                                                                                                                                                                                                                                                                                                                                                                                                                                                                                                                                                                                                                                                                                                                                                                                                                                                                                                                                                                                                                                                                                                                                                                                                                                                                                                                                                                                                                                                                                                                                                                                                                                                                                                                                                                                                                                                                                                                                                                                                                                                                                                                                                                                                                                                                                                                                                                                                                                                                                                                                                                                                                                                                                                                                                                                                                                                                                                                                                                                                                                                                                                                                                                                                                                                                                                                                                                                                                                                                                                                                                                                                                                |         |  |  |  |  |  |  |  |      |  |   |     |     |     |     |     |     |   |       |   |   |   |   |   |   |   |  |    |   |   |   |   |   |   |   |  |   |   |   |   |   |   |   |   |  |   |   |   |   |   |   |   |   |  |   |   |   |   |   |   |   |   |  |   |   |   |   |   |   |   |   |  |   |   |   |   |   |   |   |   |  |   |   |   |   |   |   |   |   |  |   |   |   |   |   |   |   |   |  |   |   |   |   |   |   |   |   |  |   |   |   |   |   |   |   |   |  |   |   |   |   |   |   |   |   |  |   |   |   |   |   |   |   |   |   |       |   |   |   |   |   |   |   |  |     |   |   |   |   |   |   |   |  |    |   |   |   |   |   |   |   |  |    |   |   |   |   |   |   |   |  |    |   |   |   |   |   |   |   |  |    |   |   |   |   |   |   |   |  |    |   |   |   |   |   |   |   |  |   |   |   |   |   |   |   |   |  |   |   |   |   |   |   |   |   |  |   |   |   |   |   |   |   |   |  |   |   |   |   |   |   |   |   |  |   |   |   |   |   |   |   |   |  |   |   |   |   |   |   |   |   |  |   |   |   |   |   |   |   |   |  |   |   |   |   |   |   |   |   |  |   |   |   |   |   |   |   |   |  |   |   |   |   |   |   |   |   |  |   |   |   |   |   |   |   |   |  |   |   |   |   |   |   |   |   |   |     |   |   |   |   |   |   |   |  |   |   |   |   |   |   |   |   |                                                                                                                                                                                                                                                                                                                                                                                                                                                                                                                                                                                                                                                                                                                                                                                                                                                                                                                                                                                                                                                                                                                                                                                                                                                                                                                                                                                                                                                                                                                                                                                                                                                                                                                                                                                                                                                                                                                                                                                                                                                                                                                                                                                                                                                                                                                                                                                                                                                                                                                                                                                                                                                                                                                                                                                                                                                                                                                                                                                                                                                                                                                                                                                                                                                                                                                                                                                                                                                                                                                                                                                                                                                                                                                                                                  |         |  |  |  |  |  |  |  |      |  |   |     |     |     |     |     |     |       |       |   |   |   |   |   |   |   |  |     |   |   |   |   |   |   |   |  |     |   |   |   |   |   |   |   |  |     |   |   |   |   |   |   |   |  |    |   |   |   |   |   |   |   |  |    |   |   |   |   |   |   |   |  |    |   |   |   |   |   |   |   |  |    |   |   |   |   |   |   |   |  |    |   |   |   |   |   |   |   |  |    |   |   |   |   |   |   |   |  |   |   |   |   |   |   |   |   |  |   |   |   |   |   |   |   |   |  |   |   |   |   |   |   |   |   |  |   |   |   |   |   |   |   |   |  |   |   |   |   |   |   |   |   |  |   |   |   |   |   |   |   |   |  |   |   |   |   |   |   |   |   |  |   |   |   |   |   |   |   |   |  |   |   |   |   |   |   |   |   |  |   |   |   |   |   |   |   |   |  |   |   |   |   |   |   |   |   |  |   |   |   |   |   |   |   |   |  |   |   |   |   |   |   |   |   |  |   |   |   |   |   |   |   |   |  |   |   |   |   |   |   |   |   |  |   |   |   |   |   |   |   |   |  |   |   |   |   |   |   |   |   |  |   |   |   |   |   |   |   |   |  |   |   |   |   |   |   |   |   |  |   |   |   |   |   |   |   |   |  |   |   |   |   |   |   |   |   |  |   |   |   |   |   |   |   |   |  |   |   |   |   |   |   |   |   |  |   |   |   |   |   |   |   |   |  |   |   |   |   |   |   |   |   |
|         | 398                                                                                                                                                                                                                                                                                                                                                                                                                                                                                                                                                                                                                                                                                                                                                                                                                                                                                                                                                                                                                                                                                                                                                                                                                                                                                                                                                                                                                                                                                                      | A            | F   | A   | Y   | Q   | N   | T   |    |      |     |     |     |     |     |     |     |     |   |       |   |   |   |   |   |   |   |   |     |   |   |                                                                                                                                                                                                                                                                                                                                                                                                                                                                                                                                                                                                                                                                                |         |   |   |   |  |   |    |     |     |     |     |   |   |   |   |    |   |   |   |   |    |   |   |   |   |    |   |   |   |   |   |   |   |   |   |   |   |   |   |   |   |   |   |   |   |   |   |   |   |   |   |   |   |   |   |   |   |   |  |   |   |   |   |   |   |   |   |   |   |   |   |   |   |   |   |   |  |   |   |   |   |   |   |   |   |  |   |   |   |   |   |   |   |   |  |   |   |   |   |   |   |   |   |                                                                                                                                                                                                                                                                                                                                                                                                                                                                                                                                                                                                                                                                                                                                                                                                                                                                                                                                                                                                                                                                                                                                                                                                                                                                                                                                                                                                                                                                                                                                                                                                                                                                                                                                                                                                                                                                                                                                                                                                                                                                                                                                                                                                                                                                                                                                                                                                                                                                                                                                                                                                                                                                                                                                                                                                                                                                                                                                                                                                                                                                                                                                                                                                                                                                                                                                                                                                                                                                                                                                                                                                                                                                |         |  |  |  |  |  |  |  |      |  |   |     |     |     |     |     |     |   |       |   |   |   |   |   |   |   |  |    |   |   |   |   |   |   |   |  |   |   |   |   |   |   |   |   |  |   |   |   |   |   |   |   |   |  |   |   |   |   |   |   |   |   |  |   |   |   |   |   |   |   |   |  |   |   |   |   |   |   |   |   |  |   |   |   |   |   |   |   |   |  |   |   |   |   |   |   |   |   |  |   |   |   |   |   |   |   |   |  |   |   |   |   |   |   |   |   |  |   |   |   |   |   |   |   |   |  |   |   |   |   |   |   |   |   |   |       |   |   |   |   |   |   |   |  |     |   |   |   |   |   |   |   |  |    |   |   |   |   |   |   |   |  |    |   |   |   |   |   |   |   |  |    |   |   |   |   |   |   |   |  |    |   |   |   |   |   |   |   |  |    |   |   |   |   |   |   |   |  |   |   |   |   |   |   |   |   |  |   |   |   |   |   |   |   |   |  |   |   |   |   |   |   |   |   |  |   |   |   |   |   |   |   |   |  |   |   |   |   |   |   |   |   |  |   |   |   |   |   |   |   |   |  |   |   |   |   |   |   |   |   |  |   |   |   |   |   |   |   |   |  |   |   |   |   |   |   |   |   |  |   |   |   |   |   |   |   |   |  |   |   |   |   |   |   |   |   |  |   |   |   |   |   |   |   |   |   |     |   |   |   |   |   |   |   |  |   |   |   |   |   |   |   |   |                                                                                                                                                                                                                                                                                                                                                                                                                                                                                                                                                                                                                                                                                                                                                                                                                                                                                                                                                                                                                                                                                                                                                                                                                                                                                                                                                                                                                                                                                                                                                                                                                                                                                                                                                                                                                                                                                                                                                                                                                                                                                                                                                                                                                                                                                                                                                                                                                                                                                                                                                                                                                                                                                                                                                                                                                                                                                                                                                                                                                                                                                                                                                                                                                                                                                                                                                                                                                                                                                                                                                                                                                                                                                                                                                                  |         |  |  |  |  |  |  |  |      |  |   |     |     |     |     |     |     |       |       |   |   |   |   |   |   |   |  |     |   |   |   |   |   |   |   |  |     |   |   |   |   |   |   |   |  |     |   |   |   |   |   |   |   |  |    |   |   |   |   |   |   |   |  |    |   |   |   |   |   |   |   |  |    |   |   |   |   |   |   |   |  |    |   |   |   |   |   |   |   |  |    |   |   |   |   |   |   |   |  |    |   |   |   |   |   |   |   |  |   |   |   |   |   |   |   |   |  |   |   |   |   |   |   |   |   |  |   |   |   |   |   |   |   |   |  |   |   |   |   |   |   |   |   |  |   |   |   |   |   |   |   |   |  |   |   |   |   |   |   |   |   |  |   |   |   |   |   |   |   |   |  |   |   |   |   |   |   |   |   |  |   |   |   |   |   |   |   |   |  |   |   |   |   |   |   |   |   |  |   |   |   |   |   |   |   |   |  |   |   |   |   |   |   |   |   |  |   |   |   |   |   |   |   |   |  |   |   |   |   |   |   |   |   |  |   |   |   |   |   |   |   |   |  |   |   |   |   |   |   |   |   |  |   |   |   |   |   |   |   |   |  |   |   |   |   |   |   |   |   |  |   |   |   |   |   |   |   |   |  |   |   |   |   |   |   |   |   |  |   |   |   |   |   |   |   |   |  |   |   |   |   |   |   |   |   |  |   |   |   |   |   |   |   |   |  |   |   |   |   |   |   |   |   |  |   |   |   |   |   |   |   |   |
|         | 229                                                                                                                                                                                                                                                                                                                                                                                                                                                                                                                                                                                                                                                                                                                                                                                                                                                                                                                                                                                                                                                                                                                                                                                                                                                                                                                                                                                                                                                                                                      | A            | F   | A   | I   | Q   | N   | T   |    |      |     |     |     |     |     |     |     |     |   |       |   |   |   |   |   |   |   |   |     |   |   |                                                                                                                                                                                                                                                                                                                                                                                                                                                                                                                                                                                                                                                                                |         |   |   |   |  |   |    |     |     |     |     |   |   |   |   |    |   |   |   |   |    |   |   |   |   |    |   |   |   |   |   |   |   |   |   |   |   |   |   |   |   |   |   |   |   |   |   |   |   |   |   |   |   |   |   |   |   |   |  |   |   |   |   |   |   |   |   |   |   |   |   |   |   |   |   |   |  |   |   |   |   |   |   |   |   |  |   |   |   |   |   |   |   |   |  |   |   |   |   |   |   |   |   |                                                                                                                                                                                                                                                                                                                                                                                                                                                                                                                                                                                                                                                                                                                                                                                                                                                                                                                                                                                                                                                                                                                                                                                                                                                                                                                                                                                                                                                                                                                                                                                                                                                                                                                                                                                                                                                                                                                                                                                                                                                                                                                                                                                                                                                                                                                                                                                                                                                                                                                                                                                                                                                                                                                                                                                                                                                                                                                                                                                                                                                                                                                                                                                                                                                                                                                                                                                                                                                                                                                                                                                                                                                                |         |  |  |  |  |  |  |  |      |  |   |     |     |     |     |     |     |   |       |   |   |   |   |   |   |   |  |    |   |   |   |   |   |   |   |  |   |   |   |   |   |   |   |   |  |   |   |   |   |   |   |   |   |  |   |   |   |   |   |   |   |   |  |   |   |   |   |   |   |   |   |  |   |   |   |   |   |   |   |   |  |   |   |   |   |   |   |   |   |  |   |   |   |   |   |   |   |   |  |   |   |   |   |   |   |   |   |  |   |   |   |   |   |   |   |   |  |   |   |   |   |   |   |   |   |  |   |   |   |   |   |   |   |   |   |       |   |   |   |   |   |   |   |  |     |   |   |   |   |   |   |   |  |    |   |   |   |   |   |   |   |  |    |   |   |   |   |   |   |   |  |    |   |   |   |   |   |   |   |  |    |   |   |   |   |   |   |   |  |    |   |   |   |   |   |   |   |  |   |   |   |   |   |   |   |   |  |   |   |   |   |   |   |   |   |  |   |   |   |   |   |   |   |   |  |   |   |   |   |   |   |   |   |  |   |   |   |   |   |   |   |   |  |   |   |   |   |   |   |   |   |  |   |   |   |   |   |   |   |   |  |   |   |   |   |   |   |   |   |  |   |   |   |   |   |   |   |   |  |   |   |   |   |   |   |   |   |  |   |   |   |   |   |   |   |   |  |   |   |   |   |   |   |   |   |   |     |   |   |   |   |   |   |   |  |   |   |   |   |   |   |   |   |                                                                                                                                                                                                                                                                                                                                                                                                                                                                                                                                                                                                                                                                                                                                                                                                                                                                                                                                                                                                                                                                                                                                                                                                                                                                                                                                                                                                                                                                                                                                                                                                                                                                                                                                                                                                                                                                                                                                                                                                                                                                                                                                                                                                                                                                                                                                                                                                                                                                                                                                                                                                                                                                                                                                                                                                                                                                                                                                                                                                                                                                                                                                                                                                                                                                                                                                                                                                                                                                                                                                                                                                                                                                                                                                                                  |         |  |  |  |  |  |  |  |      |  |   |     |     |     |     |     |     |       |       |   |   |   |   |   |   |   |  |     |   |   |   |   |   |   |   |  |     |   |   |   |   |   |   |   |  |     |   |   |   |   |   |   |   |  |    |   |   |   |   |   |   |   |  |    |   |   |   |   |   |   |   |  |    |   |   |   |   |   |   |   |  |    |   |   |   |   |   |   |   |  |    |   |   |   |   |   |   |   |  |    |   |   |   |   |   |   |   |  |   |   |   |   |   |   |   |   |  |   |   |   |   |   |   |   |   |  |   |   |   |   |   |   |   |   |  |   |   |   |   |   |   |   |   |  |   |   |   |   |   |   |   |   |  |   |   |   |   |   |   |   |   |  |   |   |   |   |   |   |   |   |  |   |   |   |   |   |   |   |   |  |   |   |   |   |   |   |   |   |  |   |   |   |   |   |   |   |   |  |   |   |   |   |   |   |   |   |  |   |   |   |   |   |   |   |   |  |   |   |   |   |   |   |   |   |  |   |   |   |   |   |   |   |   |  |   |   |   |   |   |   |   |   |  |   |   |   |   |   |   |   |   |  |   |   |   |   |   |   |   |   |  |   |   |   |   |   |   |   |   |  |   |   |   |   |   |   |   |   |  |   |   |   |   |   |   |   |   |  |   |   |   |   |   |   |   |   |  |   |   |   |   |   |   |   |   |  |   |   |   |   |   |   |   |   |  |   |   |   |   |   |   |   |   |  |   |   |   |   |   |   |   |   |
|         | 51                                                                                                                                                                                                                                                                                                                                                                                                                                                                                                                                                                                                                                                                                                                                                                                                                                                                                                                                                                                                                                                                                                                                                                                                                                                                                                                                                                                                                                                                                                       | A            | F   | A   | Y   | Q   | N   | A   |    |      |     |     |     |     |     |     |     |     |   |       |   |   |   |   |   |   |   |   |     |   |   |                                                                                                                                                                                                                                                                                                                                                                                                                                                                                                                                                                                                                                                                                |         |   |   |   |  |   |    |     |     |     |     |   |   |   |   |    |   |   |   |   |    |   |   |   |   |    |   |   |   |   |   |   |   |   |   |   |   |   |   |   |   |   |   |   |   |   |   |   |   |   |   |   |   |   |   |   |   |   |  |   |   |   |   |   |   |   |   |   |   |   |   |   |   |   |   |   |  |   |   |   |   |   |   |   |   |  |   |   |   |   |   |   |   |   |  |   |   |   |   |   |   |   |   |                                                                                                                                                                                                                                                                                                                                                                                                                                                                                                                                                                                                                                                                                                                                                                                                                                                                                                                                                                                                                                                                                                                                                                                                                                                                                                                                                                                                                                                                                                                                                                                                                                                                                                                                                                                                                                                                                                                                                                                                                                                                                                                                                                                                                                                                                                                                                                                                                                                                                                                                                                                                                                                                                                                                                                                                                                                                                                                                                                                                                                                                                                                                                                                                                                                                                                                                                                                                                                                                                                                                                                                                                                                                |         |  |  |  |  |  |  |  |      |  |   |     |     |     |     |     |     |   |       |   |   |   |   |   |   |   |  |    |   |   |   |   |   |   |   |  |   |   |   |   |   |   |   |   |  |   |   |   |   |   |   |   |   |  |   |   |   |   |   |   |   |   |  |   |   |   |   |   |   |   |   |  |   |   |   |   |   |   |   |   |  |   |   |   |   |   |   |   |   |  |   |   |   |   |   |   |   |   |  |   |   |   |   |   |   |   |   |  |   |   |   |   |   |   |   |   |  |   |   |   |   |   |   |   |   |  |   |   |   |   |   |   |   |   |   |       |   |   |   |   |   |   |   |  |     |   |   |   |   |   |   |   |  |    |   |   |   |   |   |   |   |  |    |   |   |   |   |   |   |   |  |    |   |   |   |   |   |   |   |  |    |   |   |   |   |   |   |   |  |    |   |   |   |   |   |   |   |  |   |   |   |   |   |   |   |   |  |   |   |   |   |   |   |   |   |  |   |   |   |   |   |   |   |   |  |   |   |   |   |   |   |   |   |  |   |   |   |   |   |   |   |   |  |   |   |   |   |   |   |   |   |  |   |   |   |   |   |   |   |   |  |   |   |   |   |   |   |   |   |  |   |   |   |   |   |   |   |   |  |   |   |   |   |   |   |   |   |  |   |   |   |   |   |   |   |   |  |   |   |   |   |   |   |   |   |   |     |   |   |   |   |   |   |   |  |   |   |   |   |   |   |   |   |                                                                                                                                                                                                                                                                                                                                                                                                                                                                                                                                                                                                                                                                                                                                                                                                                                                                                                                                                                                                                                                                                                                                                                                                                                                                                                                                                                                                                                                                                                                                                                                                                                                                                                                                                                                                                                                                                                                                                                                                                                                                                                                                                                                                                                                                                                                                                                                                                                                                                                                                                                                                                                                                                                                                                                                                                                                                                                                                                                                                                                                                                                                                                                                                                                                                                                                                                                                                                                                                                                                                                                                                                                                                                                                                                                  |         |  |  |  |  |  |  |  |      |  |   |     |     |     |     |     |     |       |       |   |   |   |   |   |   |   |  |     |   |   |   |   |   |   |   |  |     |   |   |   |   |   |   |   |  |     |   |   |   |   |   |   |   |  |    |   |   |   |   |   |   |   |  |    |   |   |   |   |   |   |   |  |    |   |   |   |   |   |   |   |  |    |   |   |   |   |   |   |   |  |    |   |   |   |   |   |   |   |  |    |   |   |   |   |   |   |   |  |   |   |   |   |   |   |   |   |  |   |   |   |   |   |   |   |   |  |   |   |   |   |   |   |   |   |  |   |   |   |   |   |   |   |   |  |   |   |   |   |   |   |   |   |  |   |   |   |   |   |   |   |   |  |   |   |   |   |   |   |   |   |  |   |   |   |   |   |   |   |   |  |   |   |   |   |   |   |   |   |  |   |   |   |   |   |   |   |   |  |   |   |   |   |   |   |   |   |  |   |   |   |   |   |   |   |   |  |   |   |   |   |   |   |   |   |  |   |   |   |   |   |   |   |   |  |   |   |   |   |   |   |   |   |  |   |   |   |   |   |   |   |   |  |   |   |   |   |   |   |   |   |  |   |   |   |   |   |   |   |   |  |   |   |   |   |   |   |   |   |  |   |   |   |   |   |   |   |   |  |   |   |   |   |   |   |   |   |  |   |   |   |   |   |   |   |   |  |   |   |   |   |   |   |   |   |  |   |   |   |   |   |   |   |   |  |   |   |   |   |   |   |   |   |
|         | 21                                                                                                                                                                                                                                                                                                                                                                                                                                                                                                                                                                                                                                                                                                                                                                                                                                                                                                                                                                                                                                                                                                                                                                                                                                                                                                                                                                                                                                                                                                       | A            | Y   | A   | I   | Q   | N   | T   |    |      |     |     |     |     |     |     |     |     |   |       |   |   |   |   |   |   |   |   |     |   |   |                                                                                                                                                                                                                                                                                                                                                                                                                                                                                                                                                                                                                                                                                |         |   |   |   |  |   |    |     |     |     |     |   |   |   |   |    |   |   |   |   |    |   |   |   |   |    |   |   |   |   |   |   |   |   |   |   |   |   |   |   |   |   |   |   |   |   |   |   |   |   |   |   |   |   |   |   |   |   |  |   |   |   |   |   |   |   |   |   |   |   |   |   |   |   |   |   |  |   |   |   |   |   |   |   |   |  |   |   |   |   |   |   |   |   |  |   |   |   |   |   |   |   |   |                                                                                                                                                                                                                                                                                                                                                                                                                                                                                                                                                                                                                                                                                                                                                                                                                                                                                                                                                                                                                                                                                                                                                                                                                                                                                                                                                                                                                                                                                                                                                                                                                                                                                                                                                                                                                                                                                                                                                                                                                                                                                                                                                                                                                                                                                                                                                                                                                                                                                                                                                                                                                                                                                                                                                                                                                                                                                                                                                                                                                                                                                                                                                                                                                                                                                                                                                                                                                                                                                                                                                                                                                                                                |         |  |  |  |  |  |  |  |      |  |   |     |     |     |     |     |     |   |       |   |   |   |   |   |   |   |  |    |   |   |   |   |   |   |   |  |   |   |   |   |   |   |   |   |  |   |   |   |   |   |   |   |   |  |   |   |   |   |   |   |   |   |  |   |   |   |   |   |   |   |   |  |   |   |   |   |   |   |   |   |  |   |   |   |   |   |   |   |   |  |   |   |   |   |   |   |   |   |  |   |   |   |   |   |   |   |   |  |   |   |   |   |   |   |   |   |  |   |   |   |   |   |   |   |   |  |   |   |   |   |   |   |   |   |   |       |   |   |   |   |   |   |   |  |     |   |   |   |   |   |   |   |  |    |   |   |   |   |   |   |   |  |    |   |   |   |   |   |   |   |  |    |   |   |   |   |   |   |   |  |    |   |   |   |   |   |   |   |  |    |   |   |   |   |   |   |   |  |   |   |   |   |   |   |   |   |  |   |   |   |   |   |   |   |   |  |   |   |   |   |   |   |   |   |  |   |   |   |   |   |   |   |   |  |   |   |   |   |   |   |   |   |  |   |   |   |   |   |   |   |   |  |   |   |   |   |   |   |   |   |  |   |   |   |   |   |   |   |   |  |   |   |   |   |   |   |   |   |  |   |   |   |   |   |   |   |   |  |   |   |   |   |   |   |   |   |  |   |   |   |   |   |   |   |   |   |     |   |   |   |   |   |   |   |  |   |   |   |   |   |   |   |   |                                                                                                                                                                                                                                                                                                                                                                                                                                                                                                                                                                                                                                                                                                                                                                                                                                                                                                                                                                                                                                                                                                                                                                                                                                                                                                                                                                                                                                                                                                                                                                                                                                                                                                                                                                                                                                                                                                                                                                                                                                                                                                                                                                                                                                                                                                                                                                                                                                                                                                                                                                                                                                                                                                                                                                                                                                                                                                                                                                                                                                                                                                                                                                                                                                                                                                                                                                                                                                                                                                                                                                                                                                                                                                                                                                  |         |  |  |  |  |  |  |  |      |  |   |     |     |     |     |     |     |       |       |   |   |   |   |   |   |   |  |     |   |   |   |   |   |   |   |  |     |   |   |   |   |   |   |   |  |     |   |   |   |   |   |   |   |  |    |   |   |   |   |   |   |   |  |    |   |   |   |   |   |   |   |  |    |   |   |   |   |   |   |   |  |    |   |   |   |   |   |   |   |  |    |   |   |   |   |   |   |   |  |    |   |   |   |   |   |   |   |  |   |   |   |   |   |   |   |   |  |   |   |   |   |   |   |   |   |  |   |   |   |   |   |   |   |   |  |   |   |   |   |   |   |   |   |  |   |   |   |   |   |   |   |   |  |   |   |   |   |   |   |   |   |  |   |   |   |   |   |   |   |   |  |   |   |   |   |   |   |   |   |  |   |   |   |   |   |   |   |   |  |   |   |   |   |   |   |   |   |  |   |   |   |   |   |   |   |   |  |   |   |   |   |   |   |   |   |  |   |   |   |   |   |   |   |   |  |   |   |   |   |   |   |   |   |  |   |   |   |   |   |   |   |   |  |   |   |   |   |   |   |   |   |  |   |   |   |   |   |   |   |   |  |   |   |   |   |   |   |   |   |  |   |   |   |   |   |   |   |   |  |   |   |   |   |   |   |   |   |  |   |   |   |   |   |   |   |   |  |   |   |   |   |   |   |   |   |  |   |   |   |   |   |   |   |   |  |   |   |   |   |   |   |   |   |  |   |   |   |   |   |   |   |   |
|         | 18                                                                                                                                                                                                                                                                                                                                                                                                                                                                                                                                                                                                                                                                                                                                                                                                                                                                                                                                                                                                                                                                                                                                                                                                                                                                                                                                                                                                                                                                                                       | A            | F   | A   | L   | Q   | N   | T   |    |      |     |     |     |     |     |     |     |     |   |       |   |   |   |   |   |   |   |   |     |   |   |                                                                                                                                                                                                                                                                                                                                                                                                                                                                                                                                                                                                                                                                                |         |   |   |   |  |   |    |     |     |     |     |   |   |   |   |    |   |   |   |   |    |   |   |   |   |    |   |   |   |   |   |   |   |   |   |   |   |   |   |   |   |   |   |   |   |   |   |   |   |   |   |   |   |   |   |   |   |   |  |   |   |   |   |   |   |   |   |   |   |   |   |   |   |   |   |   |  |   |   |   |   |   |   |   |   |  |   |   |   |   |   |   |   |   |  |   |   |   |   |   |   |   |   |                                                                                                                                                                                                                                                                                                                                                                                                                                                                                                                                                                                                                                                                                                                                                                                                                                                                                                                                                                                                                                                                                                                                                                                                                                                                                                                                                                                                                                                                                                                                                                                                                                                                                                                                                                                                                                                                                                                                                                                                                                                                                                                                                                                                                                                                                                                                                                                                                                                                                                                                                                                                                                                                                                                                                                                                                                                                                                                                                                                                                                                                                                                                                                                                                                                                                                                                                                                                                                                                                                                                                                                                                                                                |         |  |  |  |  |  |  |  |      |  |   |     |     |     |     |     |     |   |       |   |   |   |   |   |   |   |  |    |   |   |   |   |   |   |   |  |   |   |   |   |   |   |   |   |  |   |   |   |   |   |   |   |   |  |   |   |   |   |   |   |   |   |  |   |   |   |   |   |   |   |   |  |   |   |   |   |   |   |   |   |  |   |   |   |   |   |   |   |   |  |   |   |   |   |   |   |   |   |  |   |   |   |   |   |   |   |   |  |   |   |   |   |   |   |   |   |  |   |   |   |   |   |   |   |   |  |   |   |   |   |   |   |   |   |   |       |   |   |   |   |   |   |   |  |     |   |   |   |   |   |   |   |  |    |   |   |   |   |   |   |   |  |    |   |   |   |   |   |   |   |  |    |   |   |   |   |   |   |   |  |    |   |   |   |   |   |   |   |  |    |   |   |   |   |   |   |   |  |   |   |   |   |   |   |   |   |  |   |   |   |   |   |   |   |   |  |   |   |   |   |   |   |   |   |  |   |   |   |   |   |   |   |   |  |   |   |   |   |   |   |   |   |  |   |   |   |   |   |   |   |   |  |   |   |   |   |   |   |   |   |  |   |   |   |   |   |   |   |   |  |   |   |   |   |   |   |   |   |  |   |   |   |   |   |   |   |   |  |   |   |   |   |   |   |   |   |  |   |   |   |   |   |   |   |   |   |     |   |   |   |   |   |   |   |  |   |   |   |   |   |   |   |   |                                                                                                                                                                                                                                                                                                                                                                                                                                                                                                                                                                                                                                                                                                                                                                                                                                                                                                                                                                                                                                                                                                                                                                                                                                                                                                                                                                                                                                                                                                                                                                                                                                                                                                                                                                                                                                                                                                                                                                                                                                                                                                                                                                                                                                                                                                                                                                                                                                                                                                                                                                                                                                                                                                                                                                                                                                                                                                                                                                                                                                                                                                                                                                                                                                                                                                                                                                                                                                                                                                                                                                                                                                                                                                                                                                  |         |  |  |  |  |  |  |  |      |  |   |     |     |     |     |     |     |       |       |   |   |   |   |   |   |   |  |     |   |   |   |   |   |   |   |  |     |   |   |   |   |   |   |   |  |     |   |   |   |   |   |   |   |  |    |   |   |   |   |   |   |   |  |    |   |   |   |   |   |   |   |  |    |   |   |   |   |   |   |   |  |    |   |   |   |   |   |   |   |  |    |   |   |   |   |   |   |   |  |    |   |   |   |   |   |   |   |  |   |   |   |   |   |   |   |   |  |   |   |   |   |   |   |   |   |  |   |   |   |   |   |   |   |   |  |   |   |   |   |   |   |   |   |  |   |   |   |   |   |   |   |   |  |   |   |   |   |   |   |   |   |  |   |   |   |   |   |   |   |   |  |   |   |   |   |   |   |   |   |  |   |   |   |   |   |   |   |   |  |   |   |   |   |   |   |   |   |  |   |   |   |   |   |   |   |   |  |   |   |   |   |   |   |   |   |  |   |   |   |   |   |   |   |   |  |   |   |   |   |   |   |   |   |  |   |   |   |   |   |   |   |   |  |   |   |   |   |   |   |   |   |  |   |   |   |   |   |   |   |   |  |   |   |   |   |   |   |   |   |  |   |   |   |   |   |   |   |   |  |   |   |   |   |   |   |   |   |  |   |   |   |   |   |   |   |   |  |   |   |   |   |   |   |   |   |  |   |   |   |   |   |   |   |   |  |   |   |   |   |   |   |   |   |  |   |   |   |   |   |   |   |   |
|         | 18                                                                                                                                                                                                                                                                                                                                                                                                                                                                                                                                                                                                                                                                                                                                                                                                                                                                                                                                                                                                                                                                                                                                                                                                                                                                                                                                                                                                                                                                                                       | A            | F   | S   | Y   | Q   | N   | T   |    |      |     |     |     |     |     |     |     |     |   |       |   |   |   |   |   |   |   |   |     |   |   |                                                                                                                                                                                                                                                                                                                                                                                                                                                                                                                                                                                                                                                                                |         |   |   |   |  |   |    |     |     |     |     |   |   |   |   |    |   |   |   |   |    |   |   |   |   |    |   |   |   |   |   |   |   |   |   |   |   |   |   |   |   |   |   |   |   |   |   |   |   |   |   |   |   |   |   |   |   |   |  |   |   |   |   |   |   |   |   |   |   |   |   |   |   |   |   |   |  |   |   |   |   |   |   |   |   |  |   |   |   |   |   |   |   |   |  |   |   |   |   |   |   |   |   |                                                                                                                                                                                                                                                                                                                                                                                                                                                                                                                                                                                                                                                                                                                                                                                                                                                                                                                                                                                                                                                                                                                                                                                                                                                                                                                                                                                                                                                                                                                                                                                                                                                                                                                                                                                                                                                                                                                                                                                                                                                                                                                                                                                                                                                                                                                                                                                                                                                                                                                                                                                                                                                                                                                                                                                                                                                                                                                                                                                                                                                                                                                                                                                                                                                                                                                                                                                                                                                                                                                                                                                                                                                                |         |  |  |  |  |  |  |  |      |  |   |     |     |     |     |     |     |   |       |   |   |   |   |   |   |   |  |    |   |   |   |   |   |   |   |  |   |   |   |   |   |   |   |   |  |   |   |   |   |   |   |   |   |  |   |   |   |   |   |   |   |   |  |   |   |   |   |   |   |   |   |  |   |   |   |   |   |   |   |   |  |   |   |   |   |   |   |   |   |  |   |   |   |   |   |   |   |   |  |   |   |   |   |   |   |   |   |  |   |   |   |   |   |   |   |   |  |   |   |   |   |   |   |   |   |  |   |   |   |   |   |   |   |   |   |       |   |   |   |   |   |   |   |  |     |   |   |   |   |   |   |   |  |    |   |   |   |   |   |   |   |  |    |   |   |   |   |   |   |   |  |    |   |   |   |   |   |   |   |  |    |   |   |   |   |   |   |   |  |    |   |   |   |   |   |   |   |  |   |   |   |   |   |   |   |   |  |   |   |   |   |   |   |   |   |  |   |   |   |   |   |   |   |   |  |   |   |   |   |   |   |   |   |  |   |   |   |   |   |   |   |   |  |   |   |   |   |   |   |   |   |  |   |   |   |   |   |   |   |   |  |   |   |   |   |   |   |   |   |  |   |   |   |   |   |   |   |   |  |   |   |   |   |   |   |   |   |  |   |   |   |   |   |   |   |   |  |   |   |   |   |   |   |   |   |   |     |   |   |   |   |   |   |   |  |   |   |   |   |   |   |   |   |                                                                                                                                                                                                                                                                                                                                                                                                                                                                                                                                                                                                                                                                                                                                                                                                                                                                                                                                                                                                                                                                                                                                                                                                                                                                                                                                                                                                                                                                                                                                                                                                                                                                                                                                                                                                                                                                                                                                                                                                                                                                                                                                                                                                                                                                                                                                                                                                                                                                                                                                                                                                                                                                                                                                                                                                                                                                                                                                                                                                                                                                                                                                                                                                                                                                                                                                                                                                                                                                                                                                                                                                                                                                                                                                                                  |         |  |  |  |  |  |  |  |      |  |   |     |     |     |     |     |     |       |       |   |   |   |   |   |   |   |  |     |   |   |   |   |   |   |   |  |     |   |   |   |   |   |   |   |  |     |   |   |   |   |   |   |   |  |    |   |   |   |   |   |   |   |  |    |   |   |   |   |   |   |   |  |    |   |   |   |   |   |   |   |  |    |   |   |   |   |   |   |   |  |    |   |   |   |   |   |   |   |  |    |   |   |   |   |   |   |   |  |   |   |   |   |   |   |   |   |  |   |   |   |   |   |   |   |   |  |   |   |   |   |   |   |   |   |  |   |   |   |   |   |   |   |   |  |   |   |   |   |   |   |   |   |  |   |   |   |   |   |   |   |   |  |   |   |   |   |   |   |   |   |  |   |   |   |   |   |   |   |   |  |   |   |   |   |   |   |   |   |  |   |   |   |   |   |   |   |   |  |   |   |   |   |   |   |   |   |  |   |   |   |   |   |   |   |   |  |   |   |   |   |   |   |   |   |  |   |   |   |   |   |   |   |   |  |   |   |   |   |   |   |   |   |  |   |   |   |   |   |   |   |   |  |   |   |   |   |   |   |   |   |  |   |   |   |   |   |   |   |   |  |   |   |   |   |   |   |   |   |  |   |   |   |   |   |   |   |   |  |   |   |   |   |   |   |   |   |  |   |   |   |   |   |   |   |   |  |   |   |   |   |   |   |   |   |  |   |   |   |   |   |   |   |   |  |   |   |   |   |   |   |   |   |
|         | 17                                                                                                                                                                                                                                                                                                                                                                                                                                                                                                                                                                                                                                                                                                                                                                                                                                                                                                                                                                                                                                                                                                                                                                                                                                                                                                                                                                                                                                                                                                       | A            | F   | A   | Y   | Q   | N   | S   |    |      |     |     |     |     |     |     |     |     |   |       |   |   |   |   |   |   |   |   |     |   |   |                                                                                                                                                                                                                                                                                                                                                                                                                                                                                                                                                                                                                                                                                |         |   |   |   |  |   |    |     |     |     |     |   |   |   |   |    |   |   |   |   |    |   |   |   |   |    |   |   |   |   |   |   |   |   |   |   |   |   |   |   |   |   |   |   |   |   |   |   |   |   |   |   |   |   |   |   |   |   |  |   |   |   |   |   |   |   |   |   |   |   |   |   |   |   |   |   |  |   |   |   |   |   |   |   |   |  |   |   |   |   |   |   |   |   |  |   |   |   |   |   |   |   |   |                                                                                                                                                                                                                                                                                                                                                                                                                                                                                                                                                                                                                                                                                                                                                                                                                                                                                                                                                                                                                                                                                                                                                                                                                                                                                                                                                                                                                                                                                                                                                                                                                                                                                                                                                                                                                                                                                                                                                                                                                                                                                                                                                                                                                                                                                                                                                                                                                                                                                                                                                                                                                                                                                                                                                                                                                                                                                                                                                                                                                                                                                                                                                                                                                                                                                                                                                                                                                                                                                                                                                                                                                                                                |         |  |  |  |  |  |  |  |      |  |   |     |     |     |     |     |     |   |       |   |   |   |   |   |   |   |  |    |   |   |   |   |   |   |   |  |   |   |   |   |   |   |   |   |  |   |   |   |   |   |   |   |   |  |   |   |   |   |   |   |   |   |  |   |   |   |   |   |   |   |   |  |   |   |   |   |   |   |   |   |  |   |   |   |   |   |   |   |   |  |   |   |   |   |   |   |   |   |  |   |   |   |   |   |   |   |   |  |   |   |   |   |   |   |   |   |  |   |   |   |   |   |   |   |   |  |   |   |   |   |   |   |   |   |   |       |   |   |   |   |   |   |   |  |     |   |   |   |   |   |   |   |  |    |   |   |   |   |   |   |   |  |    |   |   |   |   |   |   |   |  |    |   |   |   |   |   |   |   |  |    |   |   |   |   |   |   |   |  |    |   |   |   |   |   |   |   |  |   |   |   |   |   |   |   |   |  |   |   |   |   |   |   |   |   |  |   |   |   |   |   |   |   |   |  |   |   |   |   |   |   |   |   |  |   |   |   |   |   |   |   |   |  |   |   |   |   |   |   |   |   |  |   |   |   |   |   |   |   |   |  |   |   |   |   |   |   |   |   |  |   |   |   |   |   |   |   |   |  |   |   |   |   |   |   |   |   |  |   |   |   |   |   |   |   |   |  |   |   |   |   |   |   |   |   |   |     |   |   |   |   |   |   |   |  |   |   |   |   |   |   |   |   |                                                                                                                                                                                                                                                                                                                                                                                                                                                                                                                                                                                                                                                                                                                                                                                                                                                                                                                                                                                                                                                                                                                                                                                                                                                                                                                                                                                                                                                                                                                                                                                                                                                                                                                                                                                                                                                                                                                                                                                                                                                                                                                                                                                                                                                                                                                                                                                                                                                                                                                                                                                                                                                                                                                                                                                                                                                                                                                                                                                                                                                                                                                                                                                                                                                                                                                                                                                                                                                                                                                                                                                                                                                                                                                                                                  |         |  |  |  |  |  |  |  |      |  |   |     |     |     |     |     |     |       |       |   |   |   |   |   |   |   |  |     |   |   |   |   |   |   |   |  |     |   |   |   |   |   |   |   |  |     |   |   |   |   |   |   |   |  |    |   |   |   |   |   |   |   |  |    |   |   |   |   |   |   |   |  |    |   |   |   |   |   |   |   |  |    |   |   |   |   |   |   |   |  |    |   |   |   |   |   |   |   |  |    |   |   |   |   |   |   |   |  |   |   |   |   |   |   |   |   |  |   |   |   |   |   |   |   |   |  |   |   |   |   |   |   |   |   |  |   |   |   |   |   |   |   |   |  |   |   |   |   |   |   |   |   |  |   |   |   |   |   |   |   |   |  |   |   |   |   |   |   |   |   |  |   |   |   |   |   |   |   |   |  |   |   |   |   |   |   |   |   |  |   |   |   |   |   |   |   |   |  |   |   |   |   |   |   |   |   |  |   |   |   |   |   |   |   |   |  |   |   |   |   |   |   |   |   |  |   |   |   |   |   |   |   |   |  |   |   |   |   |   |   |   |   |  |   |   |   |   |   |   |   |   |  |   |   |   |   |   |   |   |   |  |   |   |   |   |   |   |   |   |  |   |   |   |   |   |   |   |   |  |   |   |   |   |   |   |   |   |  |   |   |   |   |   |   |   |   |  |   |   |   |   |   |   |   |   |  |   |   |   |   |   |   |   |   |  |   |   |   |   |   |   |   |   |  |   |   |   |   |   |   |   |   |
|         | 11                                                                                                                                                                                                                                                                                                                                                                                                                                                                                                                                                                                                                                                                                                                                                                                                                                                                                                                                                                                                                                                                                                                                                                                                                                                                                                                                                                                                                                                                                                       | G            | Y   | A   | Y   | Q   | N   | T   |    |      |     |     |     |     |     |     |     |     |   |       |   |   |   |   |   |   |   |   |     |   |   |                                                                                                                                                                                                                                                                                                                                                                                                                                                                                                                                                                                                                                                                                |         |   |   |   |  |   |    |     |     |     |     |   |   |   |   |    |   |   |   |   |    |   |   |   |   |    |   |   |   |   |   |   |   |   |   |   |   |   |   |   |   |   |   |   |   |   |   |   |   |   |   |   |   |   |   |   |   |   |  |   |   |   |   |   |   |   |   |   |   |   |   |   |   |   |   |   |  |   |   |   |   |   |   |   |   |  |   |   |   |   |   |   |   |   |  |   |   |   |   |   |   |   |   |                                                                                                                                                                                                                                                                                                                                                                                                                                                                                                                                                                                                                                                                                                                                                                                                                                                                                                                                                                                                                                                                                                                                                                                                                                                                                                                                                                                                                                                                                                                                                                                                                                                                                                                                                                                                                                                                                                                                                                                                                                                                                                                                                                                                                                                                                                                                                                                                                                                                                                                                                                                                                                                                                                                                                                                                                                                                                                                                                                                                                                                                                                                                                                                                                                                                                                                                                                                                                                                                                                                                                                                                                                                                |         |  |  |  |  |  |  |  |      |  |   |     |     |     |     |     |     |   |       |   |   |   |   |   |   |   |  |    |   |   |   |   |   |   |   |  |   |   |   |   |   |   |   |   |  |   |   |   |   |   |   |   |   |  |   |   |   |   |   |   |   |   |  |   |   |   |   |   |   |   |   |  |   |   |   |   |   |   |   |   |  |   |   |   |   |   |   |   |   |  |   |   |   |   |   |   |   |   |  |   |   |   |   |   |   |   |   |  |   |   |   |   |   |   |   |   |  |   |   |   |   |   |   |   |   |  |   |   |   |   |   |   |   |   |   |       |   |   |   |   |   |   |   |  |     |   |   |   |   |   |   |   |  |    |   |   |   |   |   |   |   |  |    |   |   |   |   |   |   |   |  |    |   |   |   |   |   |   |   |  |    |   |   |   |   |   |   |   |  |    |   |   |   |   |   |   |   |  |   |   |   |   |   |   |   |   |  |   |   |   |   |   |   |   |   |  |   |   |   |   |   |   |   |   |  |   |   |   |   |   |   |   |   |  |   |   |   |   |   |   |   |   |  |   |   |   |   |   |   |   |   |  |   |   |   |   |   |   |   |   |  |   |   |   |   |   |   |   |   |  |   |   |   |   |   |   |   |   |  |   |   |   |   |   |   |   |   |  |   |   |   |   |   |   |   |   |  |   |   |   |   |   |   |   |   |   |     |   |   |   |   |   |   |   |  |   |   |   |   |   |   |   |   |                                                                                                                                                                                                                                                                                                                                                                                                                                                                                                                                                                                                                                                                                                                                                                                                                                                                                                                                                                                                                                                                                                                                                                                                                                                                                                                                                                                                                                                                                                                                                                                                                                                                                                                                                                                                                                                                                                                                                                                                                                                                                                                                                                                                                                                                                                                                                                                                                                                                                                                                                                                                                                                                                                                                                                                                                                                                                                                                                                                                                                                                                                                                                                                                                                                                                                                                                                                                                                                                                                                                                                                                                                                                                                                                                                  |         |  |  |  |  |  |  |  |      |  |   |     |     |     |     |     |     |       |       |   |   |   |   |   |   |   |  |     |   |   |   |   |   |   |   |  |     |   |   |   |   |   |   |   |  |     |   |   |   |   |   |   |   |  |    |   |   |   |   |   |   |   |  |    |   |   |   |   |   |   |   |  |    |   |   |   |   |   |   |   |  |    |   |   |   |   |   |   |   |  |    |   |   |   |   |   |   |   |  |    |   |   |   |   |   |   |   |  |   |   |   |   |   |   |   |   |  |   |   |   |   |   |   |   |   |  |   |   |   |   |   |   |   |   |  |   |   |   |   |   |   |   |   |  |   |   |   |   |   |   |   |   |  |   |   |   |   |   |   |   |   |  |   |   |   |   |   |   |   |   |  |   |   |   |   |   |   |   |   |  |   |   |   |   |   |   |   |   |  |   |   |   |   |   |   |   |   |  |   |   |   |   |   |   |   |   |  |   |   |   |   |   |   |   |   |  |   |   |   |   |   |   |   |   |  |   |   |   |   |   |   |   |   |  |   |   |   |   |   |   |   |   |  |   |   |   |   |   |   |   |   |  |   |   |   |   |   |   |   |   |  |   |   |   |   |   |   |   |   |  |   |   |   |   |   |   |   |   |  |   |   |   |   |   |   |   |   |  |   |   |   |   |   |   |   |   |  |   |   |   |   |   |   |   |   |  |   |   |   |   |   |   |   |   |  |   |   |   |   |   |   |   |   |  |   |   |   |   |   |   |   |   |
|         | 7                                                                                                                                                                                                                                                                                                                                                                                                                                                                                                                                                                                                                                                                                                                                                                                                                                                                                                                                                                                                                                                                                                                                                                                                                                                                                                                                                                                                                                                                                                        | A            | F   | A   | I   | Q   | N   | A   |    |      |     |     |     |     |     |     |     |     |   |       |   |   |   |   |   |   |   |   |     |   |   |                                                                                                                                                                                                                                                                                                                                                                                                                                                                                                                                                                                                                                                                                |         |   |   |   |  |   |    |     |     |     |     |   |   |   |   |    |   |   |   |   |    |   |   |   |   |    |   |   |   |   |   |   |   |   |   |   |   |   |   |   |   |   |   |   |   |   |   |   |   |   |   |   |   |   |   |   |   |   |  |   |   |   |   |   |   |   |   |   |   |   |   |   |   |   |   |   |  |   |   |   |   |   |   |   |   |  |   |   |   |   |   |   |   |   |  |   |   |   |   |   |   |   |   |                                                                                                                                                                                                                                                                                                                                                                                                                                                                                                                                                                                                                                                                                                                                                                                                                                                                                                                                                                                                                                                                                                                                                                                                                                                                                                                                                                                                                                                                                                                                                                                                                                                                                                                                                                                                                                                                                                                                                                                                                                                                                                                                                                                                                                                                                                                                                                                                                                                                                                                                                                                                                                                                                                                                                                                                                                                                                                                                                                                                                                                                                                                                                                                                                                                                                                                                                                                                                                                                                                                                                                                                                                                                |         |  |  |  |  |  |  |  |      |  |   |     |     |     |     |     |     |   |       |   |   |   |   |   |   |   |  |    |   |   |   |   |   |   |   |  |   |   |   |   |   |   |   |   |  |   |   |   |   |   |   |   |   |  |   |   |   |   |   |   |   |   |  |   |   |   |   |   |   |   |   |  |   |   |   |   |   |   |   |   |  |   |   |   |   |   |   |   |   |  |   |   |   |   |   |   |   |   |  |   |   |   |   |   |   |   |   |  |   |   |   |   |   |   |   |   |  |   |   |   |   |   |   |   |   |  |   |   |   |   |   |   |   |   |   |       |   |   |   |   |   |   |   |  |     |   |   |   |   |   |   |   |  |    |   |   |   |   |   |   |   |  |    |   |   |   |   |   |   |   |  |    |   |   |   |   |   |   |   |  |    |   |   |   |   |   |   |   |  |    |   |   |   |   |   |   |   |  |   |   |   |   |   |   |   |   |  |   |   |   |   |   |   |   |   |  |   |   |   |   |   |   |   |   |  |   |   |   |   |   |   |   |   |  |   |   |   |   |   |   |   |   |  |   |   |   |   |   |   |   |   |  |   |   |   |   |   |   |   |   |  |   |   |   |   |   |   |   |   |  |   |   |   |   |   |   |   |   |  |   |   |   |   |   |   |   |   |  |   |   |   |   |   |   |   |   |  |   |   |   |   |   |   |   |   |   |     |   |   |   |   |   |   |   |  |   |   |   |   |   |   |   |   |                                                                                                                                                                                                                                                                                                                                                                                                                                                                                                                                                                                                                                                                                                                                                                                                                                                                                                                                                                                                                                                                                                                                                                                                                                                                                                                                                                                                                                                                                                                                                                                                                                                                                                                                                                                                                                                                                                                                                                                                                                                                                                                                                                                                                                                                                                                                                                                                                                                                                                                                                                                                                                                                                                                                                                                                                                                                                                                                                                                                                                                                                                                                                                                                                                                                                                                                                                                                                                                                                                                                                                                                                                                                                                                                                                  |         |  |  |  |  |  |  |  |      |  |   |     |     |     |     |     |     |       |       |   |   |   |   |   |   |   |  |     |   |   |   |   |   |   |   |  |     |   |   |   |   |   |   |   |  |     |   |   |   |   |   |   |   |  |    |   |   |   |   |   |   |   |  |    |   |   |   |   |   |   |   |  |    |   |   |   |   |   |   |   |  |    |   |   |   |   |   |   |   |  |    |   |   |   |   |   |   |   |  |    |   |   |   |   |   |   |   |  |   |   |   |   |   |   |   |   |  |   |   |   |   |   |   |   |   |  |   |   |   |   |   |   |   |   |  |   |   |   |   |   |   |   |   |  |   |   |   |   |   |   |   |   |  |   |   |   |   |   |   |   |   |  |   |   |   |   |   |   |   |   |  |   |   |   |   |   |   |   |   |  |   |   |   |   |   |   |   |   |  |   |   |   |   |   |   |   |   |  |   |   |   |   |   |   |   |   |  |   |   |   |   |   |   |   |   |  |   |   |   |   |   |   |   |   |  |   |   |   |   |   |   |   |   |  |   |   |   |   |   |   |   |   |  |   |   |   |   |   |   |   |   |  |   |   |   |   |   |   |   |   |  |   |   |   |   |   |   |   |   |  |   |   |   |   |   |   |   |   |  |   |   |   |   |   |   |   |   |  |   |   |   |   |   |   |   |   |  |   |   |   |   |   |   |   |   |  |   |   |   |   |   |   |   |   |  |   |   |   |   |   |   |   |   |  |   |   |   |   |   |   |   |   |
|         | 6                                                                                                                                                                                                                                                                                                                                                                                                                                                                                                                                                                                                                                                                                                                                                                                                                                                                                                                                                                                                                                                                                                                                                                                                                                                                                                                                                                                                                                                                                                        | G            | Y   | A   | I   | Q   | N   | A   |    |      |     |     |     |     |     |     |     |     |   |       |   |   |   |   |   |   |   |   |     |   |   |                                                                                                                                                                                                                                                                                                                                                                                                                                                                                                                                                                                                                                                                                |         |   |   |   |  |   |    |     |     |     |     |   |   |   |   |    |   |   |   |   |    |   |   |   |   |    |   |   |   |   |   |   |   |   |   |   |   |   |   |   |   |   |   |   |   |   |   |   |   |   |   |   |   |   |   |   |   |   |  |   |   |   |   |   |   |   |   |   |   |   |   |   |   |   |   |   |  |   |   |   |   |   |   |   |   |  |   |   |   |   |   |   |   |   |  |   |   |   |   |   |   |   |   |                                                                                                                                                                                                                                                                                                                                                                                                                                                                                                                                                                                                                                                                                                                                                                                                                                                                                                                                                                                                                                                                                                                                                                                                                                                                                                                                                                                                                                                                                                                                                                                                                                                                                                                                                                                                                                                                                                                                                                                                                                                                                                                                                                                                                                                                                                                                                                                                                                                                                                                                                                                                                                                                                                                                                                                                                                                                                                                                                                                                                                                                                                                                                                                                                                                                                                                                                                                                                                                                                                                                                                                                                                                                |         |  |  |  |  |  |  |  |      |  |   |     |     |     |     |     |     |   |       |   |   |   |   |   |   |   |  |    |   |   |   |   |   |   |   |  |   |   |   |   |   |   |   |   |  |   |   |   |   |   |   |   |   |  |   |   |   |   |   |   |   |   |  |   |   |   |   |   |   |   |   |  |   |   |   |   |   |   |   |   |  |   |   |   |   |   |   |   |   |  |   |   |   |   |   |   |   |   |  |   |   |   |   |   |   |   |   |  |   |   |   |   |   |   |   |   |  |   |   |   |   |   |   |   |   |  |   |   |   |   |   |   |   |   |   |       |   |   |   |   |   |   |   |  |     |   |   |   |   |   |   |   |  |    |   |   |   |   |   |   |   |  |    |   |   |   |   |   |   |   |  |    |   |   |   |   |   |   |   |  |    |   |   |   |   |   |   |   |  |    |   |   |   |   |   |   |   |  |   |   |   |   |   |   |   |   |  |   |   |   |   |   |   |   |   |  |   |   |   |   |   |   |   |   |  |   |   |   |   |   |   |   |   |  |   |   |   |   |   |   |   |   |  |   |   |   |   |   |   |   |   |  |   |   |   |   |   |   |   |   |  |   |   |   |   |   |   |   |   |  |   |   |   |   |   |   |   |   |  |   |   |   |   |   |   |   |   |  |   |   |   |   |   |   |   |   |  |   |   |   |   |   |   |   |   |   |     |   |   |   |   |   |   |   |  |   |   |   |   |   |   |   |   |                                                                                                                                                                                                                                                                                                                                                                                                                                                                                                                                                                                                                                                                                                                                                                                                                                                                                                                                                                                                                                                                                                                                                                                                                                                                                                                                                                                                                                                                                                                                                                                                                                                                                                                                                                                                                                                                                                                                                                                                                                                                                                                                                                                                                                                                                                                                                                                                                                                                                                                                                                                                                                                                                                                                                                                                                                                                                                                                                                                                                                                                                                                                                                                                                                                                                                                                                                                                                                                                                                                                                                                                                                                                                                                                                                  |         |  |  |  |  |  |  |  |      |  |   |     |     |     |     |     |     |       |       |   |   |   |   |   |   |   |  |     |   |   |   |   |   |   |   |  |     |   |   |   |   |   |   |   |  |     |   |   |   |   |   |   |   |  |    |   |   |   |   |   |   |   |  |    |   |   |   |   |   |   |   |  |    |   |   |   |   |   |   |   |  |    |   |   |   |   |   |   |   |  |    |   |   |   |   |   |   |   |  |    |   |   |   |   |   |   |   |  |   |   |   |   |   |   |   |   |  |   |   |   |   |   |   |   |   |  |   |   |   |   |   |   |   |   |  |   |   |   |   |   |   |   |   |  |   |   |   |   |   |   |   |   |  |   |   |   |   |   |   |   |   |  |   |   |   |   |   |   |   |   |  |   |   |   |   |   |   |   |   |  |   |   |   |   |   |   |   |   |  |   |   |   |   |   |   |   |   |  |   |   |   |   |   |   |   |   |  |   |   |   |   |   |   |   |   |  |   |   |   |   |   |   |   |   |  |   |   |   |   |   |   |   |   |  |   |   |   |   |   |   |   |   |  |   |   |   |   |   |   |   |   |  |   |   |   |   |   |   |   |   |  |   |   |   |   |   |   |   |   |  |   |   |   |   |   |   |   |   |  |   |   |   |   |   |   |   |   |  |   |   |   |   |   |   |   |   |  |   |   |   |   |   |   |   |   |  |   |   |   |   |   |   |   |   |  |   |   |   |   |   |   |   |   |  |   |   |   |   |   |   |   |   |
|         | 6                                                                                                                                                                                                                                                                                                                                                                                                                                                                                                                                                                                                                                                                                                                                                                                                                                                                                                                                                                                                                                                                                                                                                                                                                                                                                                                                                                                                                                                                                                        | G            | F   | A   | I   | Q   | N   | T   |    |      |     |     |     |     |     |     |     |     |   |       |   |   |   |   |   |   |   |   |     |   |   |                                                                                                                                                                                                                                                                                                                                                                                                                                                                                                                                                                                                                                                                                |         |   |   |   |  |   |    |     |     |     |     |   |   |   |   |    |   |   |   |   |    |   |   |   |   |    |   |   |   |   |   |   |   |   |   |   |   |   |   |   |   |   |   |   |   |   |   |   |   |   |   |   |   |   |   |   |   |   |  |   |   |   |   |   |   |   |   |   |   |   |   |   |   |   |   |   |  |   |   |   |   |   |   |   |   |  |   |   |   |   |   |   |   |   |  |   |   |   |   |   |   |   |   |                                                                                                                                                                                                                                                                                                                                                                                                                                                                                                                                                                                                                                                                                                                                                                                                                                                                                                                                                                                                                                                                                                                                                                                                                                                                                                                                                                                                                                                                                                                                                                                                                                                                                                                                                                                                                                                                                                                                                                                                                                                                                                                                                                                                                                                                                                                                                                                                                                                                                                                                                                                                                                                                                                                                                                                                                                                                                                                                                                                                                                                                                                                                                                                                                                                                                                                                                                                                                                                                                                                                                                                                                                                                |         |  |  |  |  |  |  |  |      |  |   |     |     |     |     |     |     |   |       |   |   |   |   |   |   |   |  |    |   |   |   |   |   |   |   |  |   |   |   |   |   |   |   |   |  |   |   |   |   |   |   |   |   |  |   |   |   |   |   |   |   |   |  |   |   |   |   |   |   |   |   |  |   |   |   |   |   |   |   |   |  |   |   |   |   |   |   |   |   |  |   |   |   |   |   |   |   |   |  |   |   |   |   |   |   |   |   |  |   |   |   |   |   |   |   |   |  |   |   |   |   |   |   |   |   |  |   |   |   |   |   |   |   |   |   |       |   |   |   |   |   |   |   |  |     |   |   |   |   |   |   |   |  |    |   |   |   |   |   |   |   |  |    |   |   |   |   |   |   |   |  |    |   |   |   |   |   |   |   |  |    |   |   |   |   |   |   |   |  |    |   |   |   |   |   |   |   |  |   |   |   |   |   |   |   |   |  |   |   |   |   |   |   |   |   |  |   |   |   |   |   |   |   |   |  |   |   |   |   |   |   |   |   |  |   |   |   |   |   |   |   |   |  |   |   |   |   |   |   |   |   |  |   |   |   |   |   |   |   |   |  |   |   |   |   |   |   |   |   |  |   |   |   |   |   |   |   |   |  |   |   |   |   |   |   |   |   |  |   |   |   |   |   |   |   |   |  |   |   |   |   |   |   |   |   |   |     |   |   |   |   |   |   |   |  |   |   |   |   |   |   |   |   |                                                                                                                                                                                                                                                                                                                                                                                                                                                                                                                                                                                                                                                                                                                                                                                                                                                                                                                                                                                                                                                                                                                                                                                                                                                                                                                                                                                                                                                                                                                                                                                                                                                                                                                                                                                                                                                                                                                                                                                                                                                                                                                                                                                                                                                                                                                                                                                                                                                                                                                                                                                                                                                                                                                                                                                                                                                                                                                                                                                                                                                                                                                                                                                                                                                                                                                                                                                                                                                                                                                                                                                                                                                                                                                                                                  |         |  |  |  |  |  |  |  |      |  |   |     |     |     |     |     |     |       |       |   |   |   |   |   |   |   |  |     |   |   |   |   |   |   |   |  |     |   |   |   |   |   |   |   |  |     |   |   |   |   |   |   |   |  |    |   |   |   |   |   |   |   |  |    |   |   |   |   |   |   |   |  |    |   |   |   |   |   |   |   |  |    |   |   |   |   |   |   |   |  |    |   |   |   |   |   |   |   |  |    |   |   |   |   |   |   |   |  |   |   |   |   |   |   |   |   |  |   |   |   |   |   |   |   |   |  |   |   |   |   |   |   |   |   |  |   |   |   |   |   |   |   |   |  |   |   |   |   |   |   |   |   |  |   |   |   |   |   |   |   |   |  |   |   |   |   |   |   |   |   |  |   |   |   |   |   |   |   |   |  |   |   |   |   |   |   |   |   |  |   |   |   |   |   |   |   |   |  |   |   |   |   |   |   |   |   |  |   |   |   |   |   |   |   |   |  |   |   |   |   |   |   |   |   |  |   |   |   |   |   |   |   |   |  |   |   |   |   |   |   |   |   |  |   |   |   |   |   |   |   |   |  |   |   |   |   |   |   |   |   |  |   |   |   |   |   |   |   |   |  |   |   |   |   |   |   |   |   |  |   |   |   |   |   |   |   |   |  |   |   |   |   |   |   |   |   |  |   |   |   |   |   |   |   |   |  |   |   |   |   |   |   |   |   |  |   |   |   |   |   |   |   |   |  |   |   |   |   |   |   |   |   |
|         | 6                                                                                                                                                                                                                                                                                                                                                                                                                                                                                                                                                                                                                                                                                                                                                                                                                                                                                                                                                                                                                                                                                                                                                                                                                                                                                                                                                                                                                                                                                                        | A            | F   | A   | I   | R   | N   | T   |    |      |     |     |     |     |     |     |     |     |   |       |   |   |   |   |   |   |   |   |     |   |   |                                                                                                                                                                                                                                                                                                                                                                                                                                                                                                                                                                                                                                                                                |         |   |   |   |  |   |    |     |     |     |     |   |   |   |   |    |   |   |   |   |    |   |   |   |   |    |   |   |   |   |   |   |   |   |   |   |   |   |   |   |   |   |   |   |   |   |   |   |   |   |   |   |   |   |   |   |   |   |  |   |   |   |   |   |   |   |   |   |   |   |   |   |   |   |   |   |  |   |   |   |   |   |   |   |   |  |   |   |   |   |   |   |   |   |  |   |   |   |   |   |   |   |   |                                                                                                                                                                                                                                                                                                                                                                                                                                                                                                                                                                                                                                                                                                                                                                                                                                                                                                                                                                                                                                                                                                                                                                                                                                                                                                                                                                                                                                                                                                                                                                                                                                                                                                                                                                                                                                                                                                                                                                                                                                                                                                                                                                                                                                                                                                                                                                                                                                                                                                                                                                                                                                                                                                                                                                                                                                                                                                                                                                                                                                                                                                                                                                                                                                                                                                                                                                                                                                                                                                                                                                                                                                                                |         |  |  |  |  |  |  |  |      |  |   |     |     |     |     |     |     |   |       |   |   |   |   |   |   |   |  |    |   |   |   |   |   |   |   |  |   |   |   |   |   |   |   |   |  |   |   |   |   |   |   |   |   |  |   |   |   |   |   |   |   |   |  |   |   |   |   |   |   |   |   |  |   |   |   |   |   |   |   |   |  |   |   |   |   |   |   |   |   |  |   |   |   |   |   |   |   |   |  |   |   |   |   |   |   |   |   |  |   |   |   |   |   |   |   |   |  |   |   |   |   |   |   |   |   |  |   |   |   |   |   |   |   |   |   |       |   |   |   |   |   |   |   |  |     |   |   |   |   |   |   |   |  |    |   |   |   |   |   |   |   |  |    |   |   |   |   |   |   |   |  |    |   |   |   |   |   |   |   |  |    |   |   |   |   |   |   |   |  |    |   |   |   |   |   |   |   |  |   |   |   |   |   |   |   |   |  |   |   |   |   |   |   |   |   |  |   |   |   |   |   |   |   |   |  |   |   |   |   |   |   |   |   |  |   |   |   |   |   |   |   |   |  |   |   |   |   |   |   |   |   |  |   |   |   |   |   |   |   |   |  |   |   |   |   |   |   |   |   |  |   |   |   |   |   |   |   |   |  |   |   |   |   |   |   |   |   |  |   |   |   |   |   |   |   |   |  |   |   |   |   |   |   |   |   |   |     |   |   |   |   |   |   |   |  |   |   |   |   |   |   |   |   |                                                                                                                                                                                                                                                                                                                                                                                                                                                                                                                                                                                                                                                                                                                                                                                                                                                                                                                                                                                                                                                                                                                                                                                                                                                                                                                                                                                                                                                                                                                                                                                                                                                                                                                                                                                                                                                                                                                                                                                                                                                                                                                                                                                                                                                                                                                                                                                                                                                                                                                                                                                                                                                                                                                                                                                                                                                                                                                                                                                                                                                                                                                                                                                                                                                                                                                                                                                                                                                                                                                                                                                                                                                                                                                                                                  |         |  |  |  |  |  |  |  |      |  |   |     |     |     |     |     |     |       |       |   |   |   |   |   |   |   |  |     |   |   |   |   |   |   |   |  |     |   |   |   |   |   |   |   |  |     |   |   |   |   |   |   |   |  |    |   |   |   |   |   |   |   |  |    |   |   |   |   |   |   |   |  |    |   |   |   |   |   |   |   |  |    |   |   |   |   |   |   |   |  |    |   |   |   |   |   |   |   |  |    |   |   |   |   |   |   |   |  |   |   |   |   |   |   |   |   |  |   |   |   |   |   |   |   |   |  |   |   |   |   |   |   |   |   |  |   |   |   |   |   |   |   |   |  |   |   |   |   |   |   |   |   |  |   |   |   |   |   |   |   |   |  |   |   |   |   |   |   |   |   |  |   |   |   |   |   |   |   |   |  |   |   |   |   |   |   |   |   |  |   |   |   |   |   |   |   |   |  |   |   |   |   |   |   |   |   |  |   |   |   |   |   |   |   |   |  |   |   |   |   |   |   |   |   |  |   |   |   |   |   |   |   |   |  |   |   |   |   |   |   |   |   |  |   |   |   |   |   |   |   |   |  |   |   |   |   |   |   |   |   |  |   |   |   |   |   |   |   |   |  |   |   |   |   |   |   |   |   |  |   |   |   |   |   |   |   |   |  |   |   |   |   |   |   |   |   |  |   |   |   |   |   |   |   |   |  |   |   |   |   |   |   |   |   |  |   |   |   |   |   |   |   |   |  |   |   |   |   |   |   |   |   |
|         | 6                                                                                                                                                                                                                                                                                                                                                                                                                                                                                                                                                                                                                                                                                                                                                                                                                                                                                                                                                                                                                                                                                                                                                                                                                                                                                                                                                                                                                                                                                                        | A            | F   | N   | Y   | Q   | N   | T   |    |      |     |     |     |     |     |     |     |     |   |       |   |   |   |   |   |   |   |   |     |   |   |                                                                                                                                                                                                                                                                                                                                                                                                                                                                                                                                                                                                                                                                                |         |   |   |   |  |   |    |     |     |     |     |   |   |   |   |    |   |   |   |   |    |   |   |   |   |    |   |   |   |   |   |   |   |   |   |   |   |   |   |   |   |   |   |   |   |   |   |   |   |   |   |   |   |   |   |   |   |   |  |   |   |   |   |   |   |   |   |   |   |   |   |   |   |   |   |   |  |   |   |   |   |   |   |   |   |  |   |   |   |   |   |   |   |   |  |   |   |   |   |   |   |   |   |                                                                                                                                                                                                                                                                                                                                                                                                                                                                                                                                                                                                                                                                                                                                                                                                                                                                                                                                                                                                                                                                                                                                                                                                                                                                                                                                                                                                                                                                                                                                                                                                                                                                                                                                                                                                                                                                                                                                                                                                                                                                                                                                                                                                                                                                                                                                                                                                                                                                                                                                                                                                                                                                                                                                                                                                                                                                                                                                                                                                                                                                                                                                                                                                                                                                                                                                                                                                                                                                                                                                                                                                                                                                |         |  |  |  |  |  |  |  |      |  |   |     |     |     |     |     |     |   |       |   |   |   |   |   |   |   |  |    |   |   |   |   |   |   |   |  |   |   |   |   |   |   |   |   |  |   |   |   |   |   |   |   |   |  |   |   |   |   |   |   |   |   |  |   |   |   |   |   |   |   |   |  |   |   |   |   |   |   |   |   |  |   |   |   |   |   |   |   |   |  |   |   |   |   |   |   |   |   |  |   |   |   |   |   |   |   |   |  |   |   |   |   |   |   |   |   |  |   |   |   |   |   |   |   |   |  |   |   |   |   |   |   |   |   |   |       |   |   |   |   |   |   |   |  |     |   |   |   |   |   |   |   |  |    |   |   |   |   |   |   |   |  |    |   |   |   |   |   |   |   |  |    |   |   |   |   |   |   |   |  |    |   |   |   |   |   |   |   |  |    |   |   |   |   |   |   |   |  |   |   |   |   |   |   |   |   |  |   |   |   |   |   |   |   |   |  |   |   |   |   |   |   |   |   |  |   |   |   |   |   |   |   |   |  |   |   |   |   |   |   |   |   |  |   |   |   |   |   |   |   |   |  |   |   |   |   |   |   |   |   |  |   |   |   |   |   |   |   |   |  |   |   |   |   |   |   |   |   |  |   |   |   |   |   |   |   |   |  |   |   |   |   |   |   |   |   |  |   |   |   |   |   |   |   |   |   |     |   |   |   |   |   |   |   |  |   |   |   |   |   |   |   |   |                                                                                                                                                                                                                                                                                                                                                                                                                                                                                                                                                                                                                                                                                                                                                                                                                                                                                                                                                                                                                                                                                                                                                                                                                                                                                                                                                                                                                                                                                                                                                                                                                                                                                                                                                                                                                                                                                                                                                                                                                                                                                                                                                                                                                                                                                                                                                                                                                                                                                                                                                                                                                                                                                                                                                                                                                                                                                                                                                                                                                                                                                                                                                                                                                                                                                                                                                                                                                                                                                                                                                                                                                                                                                                                                                                  |         |  |  |  |  |  |  |  |      |  |   |     |     |     |     |     |     |       |       |   |   |   |   |   |   |   |  |     |   |   |   |   |   |   |   |  |     |   |   |   |   |   |   |   |  |     |   |   |   |   |   |   |   |  |    |   |   |   |   |   |   |   |  |    |   |   |   |   |   |   |   |  |    |   |   |   |   |   |   |   |  |    |   |   |   |   |   |   |   |  |    |   |   |   |   |   |   |   |  |    |   |   |   |   |   |   |   |  |   |   |   |   |   |   |   |   |  |   |   |   |   |   |   |   |   |  |   |   |   |   |   |   |   |   |  |   |   |   |   |   |   |   |   |  |   |   |   |   |   |   |   |   |  |   |   |   |   |   |   |   |   |  |   |   |   |   |   |   |   |   |  |   |   |   |   |   |   |   |   |  |   |   |   |   |   |   |   |   |  |   |   |   |   |   |   |   |   |  |   |   |   |   |   |   |   |   |  |   |   |   |   |   |   |   |   |  |   |   |   |   |   |   |   |   |  |   |   |   |   |   |   |   |   |  |   |   |   |   |   |   |   |   |  |   |   |   |   |   |   |   |   |  |   |   |   |   |   |   |   |   |  |   |   |   |   |   |   |   |   |  |   |   |   |   |   |   |   |   |  |   |   |   |   |   |   |   |   |  |   |   |   |   |   |   |   |   |  |   |   |   |   |   |   |   |   |  |   |   |   |   |   |   |   |   |  |   |   |   |   |   |   |   |   |  |   |   |   |   |   |   |   |   |
|         | 4                                                                                                                                                                                                                                                                                                                                                                                                                                                                                                                                                                                                                                                                                                                                                                                                                                                                                                                                                                                                                                                                                                                                                                                                                                                                                                                                                                                                                                                                                                        | G            | F   | A   | Y   | Q   | N   | T   |    |      |     |     |     |     |     |     |     |     |   |       |   |   |   |   |   |   |   |   |     |   |   |                                                                                                                                                                                                                                                                                                                                                                                                                                                                                                                                                                                                                                                                                |         |   |   |   |  |   |    |     |     |     |     |   |   |   |   |    |   |   |   |   |    |   |   |   |   |    |   |   |   |   |   |   |   |   |   |   |   |   |   |   |   |   |   |   |   |   |   |   |   |   |   |   |   |   |   |   |   |   |  |   |   |   |   |   |   |   |   |   |   |   |   |   |   |   |   |   |  |   |   |   |   |   |   |   |   |  |   |   |   |   |   |   |   |   |  |   |   |   |   |   |   |   |   |                                                                                                                                                                                                                                                                                                                                                                                                                                                                                                                                                                                                                                                                                                                                                                                                                                                                                                                                                                                                                                                                                                                                                                                                                                                                                                                                                                                                                                                                                                                                                                                                                                                                                                                                                                                                                                                                                                                                                                                                                                                                                                                                                                                                                                                                                                                                                                                                                                                                                                                                                                                                                                                                                                                                                                                                                                                                                                                                                                                                                                                                                                                                                                                                                                                                                                                                                                                                                                                                                                                                                                                                                                                                |         |  |  |  |  |  |  |  |      |  |   |     |     |     |     |     |     |   |       |   |   |   |   |   |   |   |  |    |   |   |   |   |   |   |   |  |   |   |   |   |   |   |   |   |  |   |   |   |   |   |   |   |   |  |   |   |   |   |   |   |   |   |  |   |   |   |   |   |   |   |   |  |   |   |   |   |   |   |   |   |  |   |   |   |   |   |   |   |   |  |   |   |   |   |   |   |   |   |  |   |   |   |   |   |   |   |   |  |   |   |   |   |   |   |   |   |  |   |   |   |   |   |   |   |   |  |   |   |   |   |   |   |   |   |   |       |   |   |   |   |   |   |   |  |     |   |   |   |   |   |   |   |  |    |   |   |   |   |   |   |   |  |    |   |   |   |   |   |   |   |  |    |   |   |   |   |   |   |   |  |    |   |   |   |   |   |   |   |  |    |   |   |   |   |   |   |   |  |   |   |   |   |   |   |   |   |  |   |   |   |   |   |   |   |   |  |   |   |   |   |   |   |   |   |  |   |   |   |   |   |   |   |   |  |   |   |   |   |   |   |   |   |  |   |   |   |   |   |   |   |   |  |   |   |   |   |   |   |   |   |  |   |   |   |   |   |   |   |   |  |   |   |   |   |   |   |   |   |  |   |   |   |   |   |   |   |   |  |   |   |   |   |   |   |   |   |  |   |   |   |   |   |   |   |   |   |     |   |   |   |   |   |   |   |  |   |   |   |   |   |   |   |   |                                                                                                                                                                                                                                                                                                                                                                                                                                                                                                                                                                                                                                                                                                                                                                                                                                                                                                                                                                                                                                                                                                                                                                                                                                                                                                                                                                                                                                                                                                                                                                                                                                                                                                                                                                                                                                                                                                                                                                                                                                                                                                                                                                                                                                                                                                                                                                                                                                                                                                                                                                                                                                                                                                                                                                                                                                                                                                                                                                                                                                                                                                                                                                                                                                                                                                                                                                                                                                                                                                                                                                                                                                                                                                                                                                  |         |  |  |  |  |  |  |  |      |  |   |     |     |     |     |     |     |       |       |   |   |   |   |   |   |   |  |     |   |   |   |   |   |   |   |  |     |   |   |   |   |   |   |   |  |     |   |   |   |   |   |   |   |  |    |   |   |   |   |   |   |   |  |    |   |   |   |   |   |   |   |  |    |   |   |   |   |   |   |   |  |    |   |   |   |   |   |   |   |  |    |   |   |   |   |   |   |   |  |    |   |   |   |   |   |   |   |  |   |   |   |   |   |   |   |   |  |   |   |   |   |   |   |   |   |  |   |   |   |   |   |   |   |   |  |   |   |   |   |   |   |   |   |  |   |   |   |   |   |   |   |   |  |   |   |   |   |   |   |   |   |  |   |   |   |   |   |   |   |   |  |   |   |   |   |   |   |   |   |  |   |   |   |   |   |   |   |   |  |   |   |   |   |   |   |   |   |  |   |   |   |   |   |   |   |   |  |   |   |   |   |   |   |   |   |  |   |   |   |   |   |   |   |   |  |   |   |   |   |   |   |   |   |  |   |   |   |   |   |   |   |   |  |   |   |   |   |   |   |   |   |  |   |   |   |   |   |   |   |   |  |   |   |   |   |   |   |   |   |  |   |   |   |   |   |   |   |   |  |   |   |   |   |   |   |   |   |  |   |   |   |   |   |   |   |   |  |   |   |   |   |   |   |   |   |  |   |   |   |   |   |   |   |   |  |   |   |   |   |   |   |   |   |  |   |   |   |   |   |   |   |   |
|         | 4                                                                                                                                                                                                                                                                                                                                                                                                                                                                                                                                                                                                                                                                                                                                                                                                                                                                                                                                                                                                                                                                                                                                                                                                                                                                                                                                                                                                                                                                                                        | A            | F   | N   | Y   | Q   | N   | A   |    |      |     |     |     |     |     |     |     |     |   |       |   |   |   |   |   |   |   |   |     |   |   |                                                                                                                                                                                                                                                                                                                                                                                                                                                                                                                                                                                                                                                                                |         |   |   |   |  |   |    |     |     |     |     |   |   |   |   |    |   |   |   |   |    |   |   |   |   |    |   |   |   |   |   |   |   |   |   |   |   |   |   |   |   |   |   |   |   |   |   |   |   |   |   |   |   |   |   |   |   |   |  |   |   |   |   |   |   |   |   |   |   |   |   |   |   |   |   |   |  |   |   |   |   |   |   |   |   |  |   |   |   |   |   |   |   |   |  |   |   |   |   |   |   |   |   |                                                                                                                                                                                                                                                                                                                                                                                                                                                                                                                                                                                                                                                                                                                                                                                                                                                                                                                                                                                                                                                                                                                                                                                                                                                                                                                                                                                                                                                                                                                                                                                                                                                                                                                                                                                                                                                                                                                                                                                                                                                                                                                                                                                                                                                                                                                                                                                                                                                                                                                                                                                                                                                                                                                                                                                                                                                                                                                                                                                                                                                                                                                                                                                                                                                                                                                                                                                                                                                                                                                                                                                                                                                                |         |  |  |  |  |  |  |  |      |  |   |     |     |     |     |     |     |   |       |   |   |   |   |   |   |   |  |    |   |   |   |   |   |   |   |  |   |   |   |   |   |   |   |   |  |   |   |   |   |   |   |   |   |  |   |   |   |   |   |   |   |   |  |   |   |   |   |   |   |   |   |  |   |   |   |   |   |   |   |   |  |   |   |   |   |   |   |   |   |  |   |   |   |   |   |   |   |   |  |   |   |   |   |   |   |   |   |  |   |   |   |   |   |   |   |   |  |   |   |   |   |   |   |   |   |  |   |   |   |   |   |   |   |   |   |       |   |   |   |   |   |   |   |  |     |   |   |   |   |   |   |   |  |    |   |   |   |   |   |   |   |  |    |   |   |   |   |   |   |   |  |    |   |   |   |   |   |   |   |  |    |   |   |   |   |   |   |   |  |    |   |   |   |   |   |   |   |  |   |   |   |   |   |   |   |   |  |   |   |   |   |   |   |   |   |  |   |   |   |   |   |   |   |   |  |   |   |   |   |   |   |   |   |  |   |   |   |   |   |   |   |   |  |   |   |   |   |   |   |   |   |  |   |   |   |   |   |   |   |   |  |   |   |   |   |   |   |   |   |  |   |   |   |   |   |   |   |   |  |   |   |   |   |   |   |   |   |  |   |   |   |   |   |   |   |   |  |   |   |   |   |   |   |   |   |   |     |   |   |   |   |   |   |   |  |   |   |   |   |   |   |   |   |                                                                                                                                                                                                                                                                                                                                                                                                                                                                                                                                                                                                                                                                                                                                                                                                                                                                                                                                                                                                                                                                                                                                                                                                                                                                                                                                                                                                                                                                                                                                                                                                                                                                                                                                                                                                                                                                                                                                                                                                                                                                                                                                                                                                                                                                                                                                                                                                                                                                                                                                                                                                                                                                                                                                                                                                                                                                                                                                                                                                                                                                                                                                                                                                                                                                                                                                                                                                                                                                                                                                                                                                                                                                                                                                                                  |         |  |  |  |  |  |  |  |      |  |   |     |     |     |     |     |     |       |       |   |   |   |   |   |   |   |  |     |   |   |   |   |   |   |   |  |     |   |   |   |   |   |   |   |  |     |   |   |   |   |   |   |   |  |    |   |   |   |   |   |   |   |  |    |   |   |   |   |   |   |   |  |    |   |   |   |   |   |   |   |  |    |   |   |   |   |   |   |   |  |    |   |   |   |   |   |   |   |  |    |   |   |   |   |   |   |   |  |   |   |   |   |   |   |   |   |  |   |   |   |   |   |   |   |   |  |   |   |   |   |   |   |   |   |  |   |   |   |   |   |   |   |   |  |   |   |   |   |   |   |   |   |  |   |   |   |   |   |   |   |   |  |   |   |   |   |   |   |   |   |  |   |   |   |   |   |   |   |   |  |   |   |   |   |   |   |   |   |  |   |   |   |   |   |   |   |   |  |   |   |   |   |   |   |   |   |  |   |   |   |   |   |   |   |   |  |   |   |   |   |   |   |   |   |  |   |   |   |   |   |   |   |   |  |   |   |   |   |   |   |   |   |  |   |   |   |   |   |   |   |   |  |   |   |   |   |   |   |   |   |  |   |   |   |   |   |   |   |   |  |   |   |   |   |   |   |   |   |  |   |   |   |   |   |   |   |   |  |   |   |   |   |   |   |   |   |  |   |   |   |   |   |   |   |   |  |   |   |   |   |   |   |   |   |  |   |   |   |   |   |   |   |   |  |   |   |   |   |   |   |   |   |
|         | 3                                                                                                                                                                                                                                                                                                                                                                                                                                                                                                                                                                                                                                                                                                                                                                                                                                                                                                                                                                                                                                                                                                                                                                                                                                                                                                                                                                                                                                                                                                        | A            | Y   | A   | Y   | Q   | N   | T   |    |      |     |     |     |     |     |     |     |     |   |       |   |   |   |   |   |   |   |   |     |   |   |                                                                                                                                                                                                                                                                                                                                                                                                                                                                                                                                                                                                                                                                                |         |   |   |   |  |   |    |     |     |     |     |   |   |   |   |    |   |   |   |   |    |   |   |   |   |    |   |   |   |   |   |   |   |   |   |   |   |   |   |   |   |   |   |   |   |   |   |   |   |   |   |   |   |   |   |   |   |   |  |   |   |   |   |   |   |   |   |   |   |   |   |   |   |   |   |   |  |   |   |   |   |   |   |   |   |  |   |   |   |   |   |   |   |   |  |   |   |   |   |   |   |   |   |                                                                                                                                                                                                                                                                                                                                                                                                                                                                                                                                                                                                                                                                                                                                                                                                                                                                                                                                                                                                                                                                                                                                                                                                                                                                                                                                                                                                                                                                                                                                                                                                                                                                                                                                                                                                                                                                                                                                                                                                                                                                                                                                                                                                                                                                                                                                                                                                                                                                                                                                                                                                                                                                                                                                                                                                                                                                                                                                                                                                                                                                                                                                                                                                                                                                                                                                                                                                                                                                                                                                                                                                                                                                |         |  |  |  |  |  |  |  |      |  |   |     |     |     |     |     |     |   |       |   |   |   |   |   |   |   |  |    |   |   |   |   |   |   |   |  |   |   |   |   |   |   |   |   |  |   |   |   |   |   |   |   |   |  |   |   |   |   |   |   |   |   |  |   |   |   |   |   |   |   |   |  |   |   |   |   |   |   |   |   |  |   |   |   |   |   |   |   |   |  |   |   |   |   |   |   |   |   |  |   |   |   |   |   |   |   |   |  |   |   |   |   |   |   |   |   |  |   |   |   |   |   |   |   |   |  |   |   |   |   |   |   |   |   |   |       |   |   |   |   |   |   |   |  |     |   |   |   |   |   |   |   |  |    |   |   |   |   |   |   |   |  |    |   |   |   |   |   |   |   |  |    |   |   |   |   |   |   |   |  |    |   |   |   |   |   |   |   |  |    |   |   |   |   |   |   |   |  |   |   |   |   |   |   |   |   |  |   |   |   |   |   |   |   |   |  |   |   |   |   |   |   |   |   |  |   |   |   |   |   |   |   |   |  |   |   |   |   |   |   |   |   |  |   |   |   |   |   |   |   |   |  |   |   |   |   |   |   |   |   |  |   |   |   |   |   |   |   |   |  |   |   |   |   |   |   |   |   |  |   |   |   |   |   |   |   |   |  |   |   |   |   |   |   |   |   |  |   |   |   |   |   |   |   |   |   |     |   |   |   |   |   |   |   |  |   |   |   |   |   |   |   |   |                                                                                                                                                                                                                                                                                                                                                                                                                                                                                                                                                                                                                                                                                                                                                                                                                                                                                                                                                                                                                                                                                                                                                                                                                                                                                                                                                                                                                                                                                                                                                                                                                                                                                                                                                                                                                                                                                                                                                                                                                                                                                                                                                                                                                                                                                                                                                                                                                                                                                                                                                                                                                                                                                                                                                                                                                                                                                                                                                                                                                                                                                                                                                                                                                                                                                                                                                                                                                                                                                                                                                                                                                                                                                                                                                                  |         |  |  |  |  |  |  |  |      |  |   |     |     |     |     |     |     |       |       |   |   |   |   |   |   |   |  |     |   |   |   |   |   |   |   |  |     |   |   |   |   |   |   |   |  |     |   |   |   |   |   |   |   |  |    |   |   |   |   |   |   |   |  |    |   |   |   |   |   |   |   |  |    |   |   |   |   |   |   |   |  |    |   |   |   |   |   |   |   |  |    |   |   |   |   |   |   |   |  |    |   |   |   |   |   |   |   |  |   |   |   |   |   |   |   |   |  |   |   |   |   |   |   |   |   |  |   |   |   |   |   |   |   |   |  |   |   |   |   |   |   |   |   |  |   |   |   |   |   |   |   |   |  |   |   |   |   |   |   |   |   |  |   |   |   |   |   |   |   |   |  |   |   |   |   |   |   |   |   |  |   |   |   |   |   |   |   |   |  |   |   |   |   |   |   |   |   |  |   |   |   |   |   |   |   |   |  |   |   |   |   |   |   |   |   |  |   |   |   |   |   |   |   |   |  |   |   |   |   |   |   |   |   |  |   |   |   |   |   |   |   |   |  |   |   |   |   |   |   |   |   |  |   |   |   |   |   |   |   |   |  |   |   |   |   |   |   |   |   |  |   |   |   |   |   |   |   |   |  |   |   |   |   |   |   |   |   |  |   |   |   |   |   |   |   |   |  |   |   |   |   |   |   |   |   |  |   |   |   |   |   |   |   |   |  |   |   |   |   |   |   |   |   |  |   |   |   |   |   |   |   |   |
|         | 2                                                                                                                                                                                                                                                                                                                                                                                                                                                                                                                                                                                                                                                                                                                                                                                                                                                                                                                                                                                                                                                                                                                                                                                                                                                                                                                                                                                                                                                                                                        | A            | F   | S   | Y   | Q   | N   | R   |    |      |     |     |     |     |     |     |     |     |   |       |   |   |   |   |   |   |   |   |     |   |   |                                                                                                                                                                                                                                                                                                                                                                                                                                                                                                                                                                                                                                                                                |         |   |   |   |  |   |    |     |     |     |     |   |   |   |   |    |   |   |   |   |    |   |   |   |   |    |   |   |   |   |   |   |   |   |   |   |   |   |   |   |   |   |   |   |   |   |   |   |   |   |   |   |   |   |   |   |   |   |  |   |   |   |   |   |   |   |   |   |   |   |   |   |   |   |   |   |  |   |   |   |   |   |   |   |   |  |   |   |   |   |   |   |   |   |  |   |   |   |   |   |   |   |   |                                                                                                                                                                                                                                                                                                                                                                                                                                                                                                                                                                                                                                                                                                                                                                                                                                                                                                                                                                                                                                                                                                                                                                                                                                                                                                                                                                                                                                                                                                                                                                                                                                                                                                                                                                                                                                                                                                                                                                                                                                                                                                                                                                                                                                                                                                                                                                                                                                                                                                                                                                                                                                                                                                                                                                                                                                                                                                                                                                                                                                                                                                                                                                                                                                                                                                                                                                                                                                                                                                                                                                                                                                                                |         |  |  |  |  |  |  |  |      |  |   |     |     |     |     |     |     |   |       |   |   |   |   |   |   |   |  |    |   |   |   |   |   |   |   |  |   |   |   |   |   |   |   |   |  |   |   |   |   |   |   |   |   |  |   |   |   |   |   |   |   |   |  |   |   |   |   |   |   |   |   |  |   |   |   |   |   |   |   |   |  |   |   |   |   |   |   |   |   |  |   |   |   |   |   |   |   |   |  |   |   |   |   |   |   |   |   |  |   |   |   |   |   |   |   |   |  |   |   |   |   |   |   |   |   |  |   |   |   |   |   |   |   |   |   |       |   |   |   |   |   |   |   |  |     |   |   |   |   |   |   |   |  |    |   |   |   |   |   |   |   |  |    |   |   |   |   |   |   |   |  |    |   |   |   |   |   |   |   |  |    |   |   |   |   |   |   |   |  |    |   |   |   |   |   |   |   |  |   |   |   |   |   |   |   |   |  |   |   |   |   |   |   |   |   |  |   |   |   |   |   |   |   |   |  |   |   |   |   |   |   |   |   |  |   |   |   |   |   |   |   |   |  |   |   |   |   |   |   |   |   |  |   |   |   |   |   |   |   |   |  |   |   |   |   |   |   |   |   |  |   |   |   |   |   |   |   |   |  |   |   |   |   |   |   |   |   |  |   |   |   |   |   |   |   |   |  |   |   |   |   |   |   |   |   |   |     |   |   |   |   |   |   |   |  |   |   |   |   |   |   |   |   |                                                                                                                                                                                                                                                                                                                                                                                                                                                                                                                                                                                                                                                                                                                                                                                                                                                                                                                                                                                                                                                                                                                                                                                                                                                                                                                                                                                                                                                                                                                                                                                                                                                                                                                                                                                                                                                                                                                                                                                                                                                                                                                                                                                                                                                                                                                                                                                                                                                                                                                                                                                                                                                                                                                                                                                                                                                                                                                                                                                                                                                                                                                                                                                                                                                                                                                                                                                                                                                                                                                                                                                                                                                                                                                                                                  |         |  |  |  |  |  |  |  |      |  |   |     |     |     |     |     |     |       |       |   |   |   |   |   |   |   |  |     |   |   |   |   |   |   |   |  |     |   |   |   |   |   |   |   |  |     |   |   |   |   |   |   |   |  |    |   |   |   |   |   |   |   |  |    |   |   |   |   |   |   |   |  |    |   |   |   |   |   |   |   |  |    |   |   |   |   |   |   |   |  |    |   |   |   |   |   |   |   |  |    |   |   |   |   |   |   |   |  |   |   |   |   |   |   |   |   |  |   |   |   |   |   |   |   |   |  |   |   |   |   |   |   |   |   |  |   |   |   |   |   |   |   |   |  |   |   |   |   |   |   |   |   |  |   |   |   |   |   |   |   |   |  |   |   |   |   |   |   |   |   |  |   |   |   |   |   |   |   |   |  |   |   |   |   |   |   |   |   |  |   |   |   |   |   |   |   |   |  |   |   |   |   |   |   |   |   |  |   |   |   |   |   |   |   |   |  |   |   |   |   |   |   |   |   |  |   |   |   |   |   |   |   |   |  |   |   |   |   |   |   |   |   |  |   |   |   |   |   |   |   |   |  |   |   |   |   |   |   |   |   |  |   |   |   |   |   |   |   |   |  |   |   |   |   |   |   |   |   |  |   |   |   |   |   |   |   |   |  |   |   |   |   |   |   |   |   |  |   |   |   |   |   |   |   |   |  |   |   |   |   |   |   |   |   |  |   |   |   |   |   |   |   |   |  |   |   |   |   |   |   |   |   |
|         | 2                                                                                                                                                                                                                                                                                                                                                                                                                                                                                                                                                                                                                                                                                                                                                                                                                                                                                                                                                                                                                                                                                                                                                                                                                                                                                                                                                                                                                                                                                                        | G            | F   | S   | Y   | Q   | N   | T   |    |      |     |     |     |     |     |     |     |     |   |       |   |   |   |   |   |   |   |   |     |   |   |                                                                                                                                                                                                                                                                                                                                                                                                                                                                                                                                                                                                                                                                                |         |   |   |   |  |   |    |     |     |     |     |   |   |   |   |    |   |   |   |   |    |   |   |   |   |    |   |   |   |   |   |   |   |   |   |   |   |   |   |   |   |   |   |   |   |   |   |   |   |   |   |   |   |   |   |   |   |   |  |   |   |   |   |   |   |   |   |   |   |   |   |   |   |   |   |   |  |   |   |   |   |   |   |   |   |  |   |   |   |   |   |   |   |   |  |   |   |   |   |   |   |   |   |                                                                                                                                                                                                                                                                                                                                                                                                                                                                                                                                                                                                                                                                                                                                                                                                                                                                                                                                                                                                                                                                                                                                                                                                                                                                                                                                                                                                                                                                                                                                                                                                                                                                                                                                                                                                                                                                                                                                                                                                                                                                                                                                                                                                                                                                                                                                                                                                                                                                                                                                                                                                                                                                                                                                                                                                                                                                                                                                                                                                                                                                                                                                                                                                                                                                                                                                                                                                                                                                                                                                                                                                                                                                |         |  |  |  |  |  |  |  |      |  |   |     |     |     |     |     |     |   |       |   |   |   |   |   |   |   |  |    |   |   |   |   |   |   |   |  |   |   |   |   |   |   |   |   |  |   |   |   |   |   |   |   |   |  |   |   |   |   |   |   |   |   |  |   |   |   |   |   |   |   |   |  |   |   |   |   |   |   |   |   |  |   |   |   |   |   |   |   |   |  |   |   |   |   |   |   |   |   |  |   |   |   |   |   |   |   |   |  |   |   |   |   |   |   |   |   |  |   |   |   |   |   |   |   |   |  |   |   |   |   |   |   |   |   |   |       |   |   |   |   |   |   |   |  |     |   |   |   |   |   |   |   |  |    |   |   |   |   |   |   |   |  |    |   |   |   |   |   |   |   |  |    |   |   |   |   |   |   |   |  |    |   |   |   |   |   |   |   |  |    |   |   |   |   |   |   |   |  |   |   |   |   |   |   |   |   |  |   |   |   |   |   |   |   |   |  |   |   |   |   |   |   |   |   |  |   |   |   |   |   |   |   |   |  |   |   |   |   |   |   |   |   |  |   |   |   |   |   |   |   |   |  |   |   |   |   |   |   |   |   |  |   |   |   |   |   |   |   |   |  |   |   |   |   |   |   |   |   |  |   |   |   |   |   |   |   |   |  |   |   |   |   |   |   |   |   |  |   |   |   |   |   |   |   |   |   |     |   |   |   |   |   |   |   |  |   |   |   |   |   |   |   |   |                                                                                                                                                                                                                                                                                                                                                                                                                                                                                                                                                                                                                                                                                                                                                                                                                                                                                                                                                                                                                                                                                                                                                                                                                                                                                                                                                                                                                                                                                                                                                                                                                                                                                                                                                                                                                                                                                                                                                                                                                                                                                                                                                                                                                                                                                                                                                                                                                                                                                                                                                                                                                                                                                                                                                                                                                                                                                                                                                                                                                                                                                                                                                                                                                                                                                                                                                                                                                                                                                                                                                                                                                                                                                                                                                                  |         |  |  |  |  |  |  |  |      |  |   |     |     |     |     |     |     |       |       |   |   |   |   |   |   |   |  |     |   |   |   |   |   |   |   |  |     |   |   |   |   |   |   |   |  |     |   |   |   |   |   |   |   |  |    |   |   |   |   |   |   |   |  |    |   |   |   |   |   |   |   |  |    |   |   |   |   |   |   |   |  |    |   |   |   |   |   |   |   |  |    |   |   |   |   |   |   |   |  |    |   |   |   |   |   |   |   |  |   |   |   |   |   |   |   |   |  |   |   |   |   |   |   |   |   |  |   |   |   |   |   |   |   |   |  |   |   |   |   |   |   |   |   |  |   |   |   |   |   |   |   |   |  |   |   |   |   |   |   |   |   |  |   |   |   |   |   |   |   |   |  |   |   |   |   |   |   |   |   |  |   |   |   |   |   |   |   |   |  |   |   |   |   |   |   |   |   |  |   |   |   |   |   |   |   |   |  |   |   |   |   |   |   |   |   |  |   |   |   |   |   |   |   |   |  |   |   |   |   |   |   |   |   |  |   |   |   |   |   |   |   |   |  |   |   |   |   |   |   |   |   |  |   |   |   |   |   |   |   |   |  |   |   |   |   |   |   |   |   |  |   |   |   |   |   |   |   |   |  |   |   |   |   |   |   |   |   |  |   |   |   |   |   |   |   |   |  |   |   |   |   |   |   |   |   |  |   |   |   |   |   |   |   |   |  |   |   |   |   |   |   |   |   |  |   |   |   |   |   |   |   |   |
|         | 1                                                                                                                                                                                                                                                                                                                                                                                                                                                                                                                                                                                                                                                                                                                                                                                                                                                                                                                                                                                                                                                                                                                                                                                                                                                                                                                                                                                                                                                                                                        | G            | Y   | S   | Y   | Q   | N   | T   |    |      |     |     |     |     |     |     |     |     |   |       |   |   |   |   |   |   |   |   |     |   |   |                                                                                                                                                                                                                                                                                                                                                                                                                                                                                                                                                                                                                                                                                |         |   |   |   |  |   |    |     |     |     |     |   |   |   |   |    |   |   |   |   |    |   |   |   |   |    |   |   |   |   |   |   |   |   |   |   |   |   |   |   |   |   |   |   |   |   |   |   |   |   |   |   |   |   |   |   |   |   |  |   |   |   |   |   |   |   |   |   |   |   |   |   |   |   |   |   |  |   |   |   |   |   |   |   |   |  |   |   |   |   |   |   |   |   |  |   |   |   |   |   |   |   |   |                                                                                                                                                                                                                                                                                                                                                                                                                                                                                                                                                                                                                                                                                                                                                                                                                                                                                                                                                                                                                                                                                                                                                                                                                                                                                                                                                                                                                                                                                                                                                                                                                                                                                                                                                                                                                                                                                                                                                                                                                                                                                                                                                                                                                                                                                                                                                                                                                                                                                                                                                                                                                                                                                                                                                                                                                                                                                                                                                                                                                                                                                                                                                                                                                                                                                                                                                                                                                                                                                                                                                                                                                                                                |         |  |  |  |  |  |  |  |      |  |   |     |     |     |     |     |     |   |       |   |   |   |   |   |   |   |  |    |   |   |   |   |   |   |   |  |   |   |   |   |   |   |   |   |  |   |   |   |   |   |   |   |   |  |   |   |   |   |   |   |   |   |  |   |   |   |   |   |   |   |   |  |   |   |   |   |   |   |   |   |  |   |   |   |   |   |   |   |   |  |   |   |   |   |   |   |   |   |  |   |   |   |   |   |   |   |   |  |   |   |   |   |   |   |   |   |  |   |   |   |   |   |   |   |   |  |   |   |   |   |   |   |   |   |   |       |   |   |   |   |   |   |   |  |     |   |   |   |   |   |   |   |  |    |   |   |   |   |   |   |   |  |    |   |   |   |   |   |   |   |  |    |   |   |   |   |   |   |   |  |    |   |   |   |   |   |   |   |  |    |   |   |   |   |   |   |   |  |   |   |   |   |   |   |   |   |  |   |   |   |   |   |   |   |   |  |   |   |   |   |   |   |   |   |  |   |   |   |   |   |   |   |   |  |   |   |   |   |   |   |   |   |  |   |   |   |   |   |   |   |   |  |   |   |   |   |   |   |   |   |  |   |   |   |   |   |   |   |   |  |   |   |   |   |   |   |   |   |  |   |   |   |   |   |   |   |   |  |   |   |   |   |   |   |   |   |  |   |   |   |   |   |   |   |   |   |     |   |   |   |   |   |   |   |  |   |   |   |   |   |   |   |   |                                                                                                                                                                                                                                                                                                                                                                                                                                                                                                                                                                                                                                                                                                                                                                                                                                                                                                                                                                                                                                                                                                                                                                                                                                                                                                                                                                                                                                                                                                                                                                                                                                                                                                                                                                                                                                                                                                                                                                                                                                                                                                                                                                                                                                                                                                                                                                                                                                                                                                                                                                                                                                                                                                                                                                                                                                                                                                                                                                                                                                                                                                                                                                                                                                                                                                                                                                                                                                                                                                                                                                                                                                                                                                                                                                  |         |  |  |  |  |  |  |  |      |  |   |     |     |     |     |     |     |       |       |   |   |   |   |   |   |   |  |     |   |   |   |   |   |   |   |  |     |   |   |   |   |   |   |   |  |     |   |   |   |   |   |   |   |  |    |   |   |   |   |   |   |   |  |    |   |   |   |   |   |   |   |  |    |   |   |   |   |   |   |   |  |    |   |   |   |   |   |   |   |  |    |   |   |   |   |   |   |   |  |    |   |   |   |   |   |   |   |  |   |   |   |   |   |   |   |   |  |   |   |   |   |   |   |   |   |  |   |   |   |   |   |   |   |   |  |   |   |   |   |   |   |   |   |  |   |   |   |   |   |   |   |   |  |   |   |   |   |   |   |   |   |  |   |   |   |   |   |   |   |   |  |   |   |   |   |   |   |   |   |  |   |   |   |   |   |   |   |   |  |   |   |   |   |   |   |   |   |  |   |   |   |   |   |   |   |   |  |   |   |   |   |   |   |   |   |  |   |   |   |   |   |   |   |   |  |   |   |   |   |   |   |   |   |  |   |   |   |   |   |   |   |   |  |   |   |   |   |   |   |   |   |  |   |   |   |   |   |   |   |   |  |   |   |   |   |   |   |   |   |  |   |   |   |   |   |   |   |   |  |   |   |   |   |   |   |   |   |  |   |   |   |   |   |   |   |   |  |   |   |   |   |   |   |   |   |  |   |   |   |   |   |   |   |   |  |   |   |   |   |   |   |   |   |  |   |   |   |   |   |   |   |   |
|         | 1                                                                                                                                                                                                                                                                                                                                                                                                                                                                                                                                                                                                                                                                                                                                                                                                                                                                                                                                                                                                                                                                                                                                                                                                                                                                                                                                                                                                                                                                                                        | P            | Y   | A   | I   | Q   | N   | A   |    |      |     |     |     |     |     |     |     |     |   |       |   |   |   |   |   |   |   |   |     |   |   |                                                                                                                                                                                                                                                                                                                                                                                                                                                                                                                                                                                                                                                                                |         |   |   |   |  |   |    |     |     |     |     |   |   |   |   |    |   |   |   |   |    |   |   |   |   |    |   |   |   |   |   |   |   |   |   |   |   |   |   |   |   |   |   |   |   |   |   |   |   |   |   |   |   |   |   |   |   |   |  |   |   |   |   |   |   |   |   |   |   |   |   |   |   |   |   |   |  |   |   |   |   |   |   |   |   |  |   |   |   |   |   |   |   |   |  |   |   |   |   |   |   |   |   |                                                                                                                                                                                                                                                                                                                                                                                                                                                                                                                                                                                                                                                                                                                                                                                                                                                                                                                                                                                                                                                                                                                                                                                                                                                                                                                                                                                                                                                                                                                                                                                                                                                                                                                                                                                                                                                                                                                                                                                                                                                                                                                                                                                                                                                                                                                                                                                                                                                                                                                                                                                                                                                                                                                                                                                                                                                                                                                                                                                                                                                                                                                                                                                                                                                                                                                                                                                                                                                                                                                                                                                                                                                                |         |  |  |  |  |  |  |  |      |  |   |     |     |     |     |     |     |   |       |   |   |   |   |   |   |   |  |    |   |   |   |   |   |   |   |  |   |   |   |   |   |   |   |   |  |   |   |   |   |   |   |   |   |  |   |   |   |   |   |   |   |   |  |   |   |   |   |   |   |   |   |  |   |   |   |   |   |   |   |   |  |   |   |   |   |   |   |   |   |  |   |   |   |   |   |   |   |   |  |   |   |   |   |   |   |   |   |  |   |   |   |   |   |   |   |   |  |   |   |   |   |   |   |   |   |  |   |   |   |   |   |   |   |   |   |       |   |   |   |   |   |   |   |  |     |   |   |   |   |   |   |   |  |    |   |   |   |   |   |   |   |  |    |   |   |   |   |   |   |   |  |    |   |   |   |   |   |   |   |  |    |   |   |   |   |   |   |   |  |    |   |   |   |   |   |   |   |  |   |   |   |   |   |   |   |   |  |   |   |   |   |   |   |   |   |  |   |   |   |   |   |   |   |   |  |   |   |   |   |   |   |   |   |  |   |   |   |   |   |   |   |   |  |   |   |   |   |   |   |   |   |  |   |   |   |   |   |   |   |   |  |   |   |   |   |   |   |   |   |  |   |   |   |   |   |   |   |   |  |   |   |   |   |   |   |   |   |  |   |   |   |   |   |   |   |   |  |   |   |   |   |   |   |   |   |   |     |   |   |   |   |   |   |   |  |   |   |   |   |   |   |   |   |                                                                                                                                                                                                                                                                                                                                                                                                                                                                                                                                                                                                                                                                                                                                                                                                                                                                                                                                                                                                                                                                                                                                                                                                                                                                                                                                                                                                                                                                                                                                                                                                                                                                                                                                                                                                                                                                                                                                                                                                                                                                                                                                                                                                                                                                                                                                                                                                                                                                                                                                                                                                                                                                                                                                                                                                                                                                                                                                                                                                                                                                                                                                                                                                                                                                                                                                                                                                                                                                                                                                                                                                                                                                                                                                                                  |         |  |  |  |  |  |  |  |      |  |   |     |     |     |     |     |     |       |       |   |   |   |   |   |   |   |  |     |   |   |   |   |   |   |   |  |     |   |   |   |   |   |   |   |  |     |   |   |   |   |   |   |   |  |    |   |   |   |   |   |   |   |  |    |   |   |   |   |   |   |   |  |    |   |   |   |   |   |   |   |  |    |   |   |   |   |   |   |   |  |    |   |   |   |   |   |   |   |  |    |   |   |   |   |   |   |   |  |   |   |   |   |   |   |   |   |  |   |   |   |   |   |   |   |   |  |   |   |   |   |   |   |   |   |  |   |   |   |   |   |   |   |   |  |   |   |   |   |   |   |   |   |  |   |   |   |   |   |   |   |   |  |   |   |   |   |   |   |   |   |  |   |   |   |   |   |   |   |   |  |   |   |   |   |   |   |   |   |  |   |   |   |   |   |   |   |   |  |   |   |   |   |   |   |   |   |  |   |   |   |   |   |   |   |   |  |   |   |   |   |   |   |   |   |  |   |   |   |   |   |   |   |   |  |   |   |   |   |   |   |   |   |  |   |   |   |   |   |   |   |   |  |   |   |   |   |   |   |   |   |  |   |   |   |   |   |   |   |   |  |   |   |   |   |   |   |   |   |  |   |   |   |   |   |   |   |   |  |   |   |   |   |   |   |   |   |  |   |   |   |   |   |   |   |   |  |   |   |   |   |   |   |   |   |  |   |   |   |   |   |   |   |   |  |   |   |   |   |   |   |   |   |
|         | 1                                                                                                                                                                                                                                                                                                                                                                                                                                                                                                                                                                                                                                                                                                                                                                                                                                                                                                                                                                                                                                                                                                                                                                                                                                                                                                                                                                                                                                                                                                        | A            | Y   | A   | T   | Q   | N   | A   |    |      |     |     |     |     |     |     |     |     |   |       |   |   |   |   |   |   |   |   |     |   |   |                                                                                                                                                                                                                                                                                                                                                                                                                                                                                                                                                                                                                                                                                |         |   |   |   |  |   |    |     |     |     |     |   |   |   |   |    |   |   |   |   |    |   |   |   |   |    |   |   |   |   |   |   |   |   |   |   |   |   |   |   |   |   |   |   |   |   |   |   |   |   |   |   |   |   |   |   |   |   |  |   |   |   |   |   |   |   |   |   |   |   |   |   |   |   |   |   |  |   |   |   |   |   |   |   |   |  |   |   |   |   |   |   |   |   |  |   |   |   |   |   |   |   |   |                                                                                                                                                                                                                                                                                                                                                                                                                                                                                                                                                                                                                                                                                                                                                                                                                                                                                                                                                                                                                                                                                                                                                                                                                                                                                                                                                                                                                                                                                                                                                                                                                                                                                                                                                                                                                                                                                                                                                                                                                                                                                                                                                                                                                                                                                                                                                                                                                                                                                                                                                                                                                                                                                                                                                                                                                                                                                                                                                                                                                                                                                                                                                                                                                                                                                                                                                                                                                                                                                                                                                                                                                                                                |         |  |  |  |  |  |  |  |      |  |   |     |     |     |     |     |     |   |       |   |   |   |   |   |   |   |  |    |   |   |   |   |   |   |   |  |   |   |   |   |   |   |   |   |  |   |   |   |   |   |   |   |   |  |   |   |   |   |   |   |   |   |  |   |   |   |   |   |   |   |   |  |   |   |   |   |   |   |   |   |  |   |   |   |   |   |   |   |   |  |   |   |   |   |   |   |   |   |  |   |   |   |   |   |   |   |   |  |   |   |   |   |   |   |   |   |  |   |   |   |   |   |   |   |   |  |   |   |   |   |   |   |   |   |   |       |   |   |   |   |   |   |   |  |     |   |   |   |   |   |   |   |  |    |   |   |   |   |   |   |   |  |    |   |   |   |   |   |   |   |  |    |   |   |   |   |   |   |   |  |    |   |   |   |   |   |   |   |  |    |   |   |   |   |   |   |   |  |   |   |   |   |   |   |   |   |  |   |   |   |   |   |   |   |   |  |   |   |   |   |   |   |   |   |  |   |   |   |   |   |   |   |   |  |   |   |   |   |   |   |   |   |  |   |   |   |   |   |   |   |   |  |   |   |   |   |   |   |   |   |  |   |   |   |   |   |   |   |   |  |   |   |   |   |   |   |   |   |  |   |   |   |   |   |   |   |   |  |   |   |   |   |   |   |   |   |  |   |   |   |   |   |   |   |   |   |     |   |   |   |   |   |   |   |  |   |   |   |   |   |   |   |   |                                                                                                                                                                                                                                                                                                                                                                                                                                                                                                                                                                                                                                                                                                                                                                                                                                                                                                                                                                                                                                                                                                                                                                                                                                                                                                                                                                                                                                                                                                                                                                                                                                                                                                                                                                                                                                                                                                                                                                                                                                                                                                                                                                                                                                                                                                                                                                                                                                                                                                                                                                                                                                                                                                                                                                                                                                                                                                                                                                                                                                                                                                                                                                                                                                                                                                                                                                                                                                                                                                                                                                                                                                                                                                                                                                  |         |  |  |  |  |  |  |  |      |  |   |     |     |     |     |     |     |       |       |   |   |   |   |   |   |   |  |     |   |   |   |   |   |   |   |  |     |   |   |   |   |   |   |   |  |     |   |   |   |   |   |   |   |  |    |   |   |   |   |   |   |   |  |    |   |   |   |   |   |   |   |  |    |   |   |   |   |   |   |   |  |    |   |   |   |   |   |   |   |  |    |   |   |   |   |   |   |   |  |    |   |   |   |   |   |   |   |  |   |   |   |   |   |   |   |   |  |   |   |   |   |   |   |   |   |  |   |   |   |   |   |   |   |   |  |   |   |   |   |   |   |   |   |  |   |   |   |   |   |   |   |   |  |   |   |   |   |   |   |   |   |  |   |   |   |   |   |   |   |   |  |   |   |   |   |   |   |   |   |  |   |   |   |   |   |   |   |   |  |   |   |   |   |   |   |   |   |  |   |   |   |   |   |   |   |   |  |   |   |   |   |   |   |   |   |  |   |   |   |   |   |   |   |   |  |   |   |   |   |   |   |   |   |  |   |   |   |   |   |   |   |   |  |   |   |   |   |   |   |   |   |  |   |   |   |   |   |   |   |   |  |   |   |   |   |   |   |   |   |  |   |   |   |   |   |   |   |   |  |   |   |   |   |   |   |   |   |  |   |   |   |   |   |   |   |   |  |   |   |   |   |   |   |   |   |  |   |   |   |   |   |   |   |   |  |   |   |   |   |   |   |   |   |  |   |   |   |   |   |   |   |   |
|         | 1                                                                                                                                                                                                                                                                                                                                                                                                                                                                                                                                                                                                                                                                                                                                                                                                                                                                                                                                                                                                                                                                                                                                                                                                                                                                                                                                                                                                                                                                                                        | A            | Y   | A   | I   | K   | N   | A   |    |      |     |     |     |     |     |     |     |     |   |       |   |   |   |   |   |   |   |   |     |   |   |                                                                                                                                                                                                                                                                                                                                                                                                                                                                                                                                                                                                                                                                                |         |   |   |   |  |   |    |     |     |     |     |   |   |   |   |    |   |   |   |   |    |   |   |   |   |    |   |   |   |   |   |   |   |   |   |   |   |   |   |   |   |   |   |   |   |   |   |   |   |   |   |   |   |   |   |   |   |   |  |   |   |   |   |   |   |   |   |   |   |   |   |   |   |   |   |   |  |   |   |   |   |   |   |   |   |  |   |   |   |   |   |   |   |   |  |   |   |   |   |   |   |   |   |                                                                                                                                                                                                                                                                                                                                                                                                                                                                                                                                                                                                                                                                                                                                                                                                                                                                                                                                                                                                                                                                                                                                                                                                                                                                                                                                                                                                                                                                                                                                                                                                                                                                                                                                                                                                                                                                                                                                                                                                                                                                                                                                                                                                                                                                                                                                                                                                                                                                                                                                                                                                                                                                                                                                                                                                                                                                                                                                                                                                                                                                                                                                                                                                                                                                                                                                                                                                                                                                                                                                                                                                                                                                |         |  |  |  |  |  |  |  |      |  |   |     |     |     |     |     |     |   |       |   |   |   |   |   |   |   |  |    |   |   |   |   |   |   |   |  |   |   |   |   |   |   |   |   |  |   |   |   |   |   |   |   |   |  |   |   |   |   |   |   |   |   |  |   |   |   |   |   |   |   |   |  |   |   |   |   |   |   |   |   |  |   |   |   |   |   |   |   |   |  |   |   |   |   |   |   |   |   |  |   |   |   |   |   |   |   |   |  |   |   |   |   |   |   |   |   |  |   |   |   |   |   |   |   |   |  |   |   |   |   |   |   |   |   |   |       |   |   |   |   |   |   |   |  |     |   |   |   |   |   |   |   |  |    |   |   |   |   |   |   |   |  |    |   |   |   |   |   |   |   |  |    |   |   |   |   |   |   |   |  |    |   |   |   |   |   |   |   |  |    |   |   |   |   |   |   |   |  |   |   |   |   |   |   |   |   |  |   |   |   |   |   |   |   |   |  |   |   |   |   |   |   |   |   |  |   |   |   |   |   |   |   |   |  |   |   |   |   |   |   |   |   |  |   |   |   |   |   |   |   |   |  |   |   |   |   |   |   |   |   |  |   |   |   |   |   |   |   |   |  |   |   |   |   |   |   |   |   |  |   |   |   |   |   |   |   |   |  |   |   |   |   |   |   |   |   |  |   |   |   |   |   |   |   |   |   |     |   |   |   |   |   |   |   |  |   |   |   |   |   |   |   |   |                                                                                                                                                                                                                                                                                                                                                                                                                                                                                                                                                                                                                                                                                                                                                                                                                                                                                                                                                                                                                                                                                                                                                                                                                                                                                                                                                                                                                                                                                                                                                                                                                                                                                                                                                                                                                                                                                                                                                                                                                                                                                                                                                                                                                                                                                                                                                                                                                                                                                                                                                                                                                                                                                                                                                                                                                                                                                                                                                                                                                                                                                                                                                                                                                                                                                                                                                                                                                                                                                                                                                                                                                                                                                                                                                                  |         |  |  |  |  |  |  |  |      |  |   |     |     |     |     |     |     |       |       |   |   |   |   |   |   |   |  |     |   |   |   |   |   |   |   |  |     |   |   |   |   |   |   |   |  |     |   |   |   |   |   |   |   |  |    |   |   |   |   |   |   |   |  |    |   |   |   |   |   |   |   |  |    |   |   |   |   |   |   |   |  |    |   |   |   |   |   |   |   |  |    |   |   |   |   |   |   |   |  |    |   |   |   |   |   |   |   |  |   |   |   |   |   |   |   |   |  |   |   |   |   |   |   |   |   |  |   |   |   |   |   |   |   |   |  |   |   |   |   |   |   |   |   |  |   |   |   |   |   |   |   |   |  |   |   |   |   |   |   |   |   |  |   |   |   |   |   |   |   |   |  |   |   |   |   |   |   |   |   |  |   |   |   |   |   |   |   |   |  |   |   |   |   |   |   |   |   |  |   |   |   |   |   |   |   |   |  |   |   |   |   |   |   |   |   |  |   |   |   |   |   |   |   |   |  |   |   |   |   |   |   |   |   |  |   |   |   |   |   |   |   |   |  |   |   |   |   |   |   |   |   |  |   |   |   |   |   |   |   |   |  |   |   |   |   |   |   |   |   |  |   |   |   |   |   |   |   |   |  |   |   |   |   |   |   |   |   |  |   |   |   |   |   |   |   |   |  |   |   |   |   |   |   |   |   |  |   |   |   |   |   |   |   |   |  |   |   |   |   |   |   |   |   |  |   |   |   |   |   |   |   |   |
|         | 1                                                                                                                                                                                                                                                                                                                                                                                                                                                                                                                                                                                                                                                                                                                                                                                                                                                                                                                                                                                                                                                                                                                                                                                                                                                                                                                                                                                                                                                                                                        | V            | F   | A   | I   | Q   | N   | T   |    |      |     |     |     |     |     |     |     |     |   |       |   |   |   |   |   |   |   |   |     |   |   |                                                                                                                                                                                                                                                                                                                                                                                                                                                                                                                                                                                                                                                                                |         |   |   |   |  |   |    |     |     |     |     |   |   |   |   |    |   |   |   |   |    |   |   |   |   |    |   |   |   |   |   |   |   |   |   |   |   |   |   |   |   |   |   |   |   |   |   |   |   |   |   |   |   |   |   |   |   |   |  |   |   |   |   |   |   |   |   |   |   |   |   |   |   |   |   |   |  |   |   |   |   |   |   |   |   |  |   |   |   |   |   |   |   |   |  |   |   |   |   |   |   |   |   |                                                                                                                                                                                                                                                                                                                                                                                                                                                                                                                                                                                                                                                                                                                                                                                                                                                                                                                                                                                                                                                                                                                                                                                                                                                                                                                                                                                                                                                                                                                                                                                                                                                                                                                                                                                                                                                                                                                                                                                                                                                                                                                                                                                                                                                                                                                                                                                                                                                                                                                                                                                                                                                                                                                                                                                                                                                                                                                                                                                                                                                                                                                                                                                                                                                                                                                                                                                                                                                                                                                                                                                                                                                                |         |  |  |  |  |  |  |  |      |  |   |     |     |     |     |     |     |   |       |   |   |   |   |   |   |   |  |    |   |   |   |   |   |   |   |  |   |   |   |   |   |   |   |   |  |   |   |   |   |   |   |   |   |  |   |   |   |   |   |   |   |   |  |   |   |   |   |   |   |   |   |  |   |   |   |   |   |   |   |   |  |   |   |   |   |   |   |   |   |  |   |   |   |   |   |   |   |   |  |   |   |   |   |   |   |   |   |  |   |   |   |   |   |   |   |   |  |   |   |   |   |   |   |   |   |  |   |   |   |   |   |   |   |   |   |       |   |   |   |   |   |   |   |  |     |   |   |   |   |   |   |   |  |    |   |   |   |   |   |   |   |  |    |   |   |   |   |   |   |   |  |    |   |   |   |   |   |   |   |  |    |   |   |   |   |   |   |   |  |    |   |   |   |   |   |   |   |  |   |   |   |   |   |   |   |   |  |   |   |   |   |   |   |   |   |  |   |   |   |   |   |   |   |   |  |   |   |   |   |   |   |   |   |  |   |   |   |   |   |   |   |   |  |   |   |   |   |   |   |   |   |  |   |   |   |   |   |   |   |   |  |   |   |   |   |   |   |   |   |  |   |   |   |   |   |   |   |   |  |   |   |   |   |   |   |   |   |  |   |   |   |   |   |   |   |   |  |   |   |   |   |   |   |   |   |   |     |   |   |   |   |   |   |   |  |   |   |   |   |   |   |   |   |                                                                                                                                                                                                                                                                                                                                                                                                                                                                                                                                                                                                                                                                                                                                                                                                                                                                                                                                                                                                                                                                                                                                                                                                                                                                                                                                                                                                                                                                                                                                                                                                                                                                                                                                                                                                                                                                                                                                                                                                                                                                                                                                                                                                                                                                                                                                                                                                                                                                                                                                                                                                                                                                                                                                                                                                                                                                                                                                                                                                                                                                                                                                                                                                                                                                                                                                                                                                                                                                                                                                                                                                                                                                                                                                                                  |         |  |  |  |  |  |  |  |      |  |   |     |     |     |     |     |     |       |       |   |   |   |   |   |   |   |  |     |   |   |   |   |   |   |   |  |     |   |   |   |   |   |   |   |  |     |   |   |   |   |   |   |   |  |    |   |   |   |   |   |   |   |  |    |   |   |   |   |   |   |   |  |    |   |   |   |   |   |   |   |  |    |   |   |   |   |   |   |   |  |    |   |   |   |   |   |   |   |  |    |   |   |   |   |   |   |   |  |   |   |   |   |   |   |   |   |  |   |   |   |   |   |   |   |   |  |   |   |   |   |   |   |   |   |  |   |   |   |   |   |   |   |   |  |   |   |   |   |   |   |   |   |  |   |   |   |   |   |   |   |   |  |   |   |   |   |   |   |   |   |  |   |   |   |   |   |   |   |   |  |   |   |   |   |   |   |   |   |  |   |   |   |   |   |   |   |   |  |   |   |   |   |   |   |   |   |  |   |   |   |   |   |   |   |   |  |   |   |   |   |   |   |   |   |  |   |   |   |   |   |   |   |   |  |   |   |   |   |   |   |   |   |  |   |   |   |   |   |   |   |   |  |   |   |   |   |   |   |   |   |  |   |   |   |   |   |   |   |   |  |   |   |   |   |   |   |   |   |  |   |   |   |   |   |   |   |   |  |   |   |   |   |   |   |   |   |  |   |   |   |   |   |   |   |   |  |   |   |   |   |   |   |   |   |  |   |   |   |   |   |   |   |   |  |   |   |   |   |   |   |   |   |
|         | 1                                                                                                                                                                                                                                                                                                                                                                                                                                                                                                                                                                                                                                                                                                                                                                                                                                                                                                                                                                                                                                                                                                                                                                                                                                                                                                                                                                                                                                                                                                        | A            | F   | A   | L   | Q   | N   | A   |    |      |     |     |     |     |     |     |     |     |   |       |   |   |   |   |   |   |   |   |     |   |   |                                                                                                                                                                                                                                                                                                                                                                                                                                                                                                                                                                                                                                                                                |         |   |   |   |  |   |    |     |     |     |     |   |   |   |   |    |   |   |   |   |    |   |   |   |   |    |   |   |   |   |   |   |   |   |   |   |   |   |   |   |   |   |   |   |   |   |   |   |   |   |   |   |   |   |   |   |   |   |  |   |   |   |   |   |   |   |   |   |   |   |   |   |   |   |   |   |  |   |   |   |   |   |   |   |   |  |   |   |   |   |   |   |   |   |  |   |   |   |   |   |   |   |   |                                                                                                                                                                                                                                                                                                                                                                                                                                                                                                                                                                                                                                                                                                                                                                                                                                                                                                                                                                                                                                                                                                                                                                                                                                                                                                                                                                                                                                                                                                                                                                                                                                                                                                                                                                                                                                                                                                                                                                                                                                                                                                                                                                                                                                                                                                                                                                                                                                                                                                                                                                                                                                                                                                                                                                                                                                                                                                                                                                                                                                                                                                                                                                                                                                                                                                                                                                                                                                                                                                                                                                                                                                                                |         |  |  |  |  |  |  |  |      |  |   |     |     |     |     |     |     |   |       |   |   |   |   |   |   |   |  |    |   |   |   |   |   |   |   |  |   |   |   |   |   |   |   |   |  |   |   |   |   |   |   |   |   |  |   |   |   |   |   |   |   |   |  |   |   |   |   |   |   |   |   |  |   |   |   |   |   |   |   |   |  |   |   |   |   |   |   |   |   |  |   |   |   |   |   |   |   |   |  |   |   |   |   |   |   |   |   |  |   |   |   |   |   |   |   |   |  |   |   |   |   |   |   |   |   |  |   |   |   |   |   |   |   |   |   |       |   |   |   |   |   |   |   |  |     |   |   |   |   |   |   |   |  |    |   |   |   |   |   |   |   |  |    |   |   |   |   |   |   |   |  |    |   |   |   |   |   |   |   |  |    |   |   |   |   |   |   |   |  |    |   |   |   |   |   |   |   |  |   |   |   |   |   |   |   |   |  |   |   |   |   |   |   |   |   |  |   |   |   |   |   |   |   |   |  |   |   |   |   |   |   |   |   |  |   |   |   |   |   |   |   |   |  |   |   |   |   |   |   |   |   |  |   |   |   |   |   |   |   |   |  |   |   |   |   |   |   |   |   |  |   |   |   |   |   |   |   |   |  |   |   |   |   |   |   |   |   |  |   |   |   |   |   |   |   |   |  |   |   |   |   |   |   |   |   |   |     |   |   |   |   |   |   |   |  |   |   |   |   |   |   |   |   |                                                                                                                                                                                                                                                                                                                                                                                                                                                                                                                                                                                                                                                                                                                                                                                                                                                                                                                                                                                                                                                                                                                                                                                                                                                                                                                                                                                                                                                                                                                                                                                                                                                                                                                                                                                                                                                                                                                                                                                                                                                                                                                                                                                                                                                                                                                                                                                                                                                                                                                                                                                                                                                                                                                                                                                                                                                                                                                                                                                                                                                                                                                                                                                                                                                                                                                                                                                                                                                                                                                                                                                                                                                                                                                                                                  |         |  |  |  |  |  |  |  |      |  |   |     |     |     |     |     |     |       |       |   |   |   |   |   |   |   |  |     |   |   |   |   |   |   |   |  |     |   |   |   |   |   |   |   |  |     |   |   |   |   |   |   |   |  |    |   |   |   |   |   |   |   |  |    |   |   |   |   |   |   |   |  |    |   |   |   |   |   |   |   |  |    |   |   |   |   |   |   |   |  |    |   |   |   |   |   |   |   |  |    |   |   |   |   |   |   |   |  |   |   |   |   |   |   |   |   |  |   |   |   |   |   |   |   |   |  |   |   |   |   |   |   |   |   |  |   |   |   |   |   |   |   |   |  |   |   |   |   |   |   |   |   |  |   |   |   |   |   |   |   |   |  |   |   |   |   |   |   |   |   |  |   |   |   |   |   |   |   |   |  |   |   |   |   |   |   |   |   |  |   |   |   |   |   |   |   |   |  |   |   |   |   |   |   |   |   |  |   |   |   |   |   |   |   |   |  |   |   |   |   |   |   |   |   |  |   |   |   |   |   |   |   |   |  |   |   |   |   |   |   |   |   |  |   |   |   |   |   |   |   |   |  |   |   |   |   |   |   |   |   |  |   |   |   |   |   |   |   |   |  |   |   |   |   |   |   |   |   |  |   |   |   |   |   |   |   |   |  |   |   |   |   |   |   |   |   |  |   |   |   |   |   |   |   |   |  |   |   |   |   |   |   |   |   |  |   |   |   |   |   |   |   |   |  |   |   |   |   |   |   |   |   |
|         | 1                                                                                                                                                                                                                                                                                                                                                                                                                                                                                                                                                                                                                                                                                                                                                                                                                                                                                                                                                                                                                                                                                                                                                                                                                                                                                                                                                                                                                                                                                                        | A            | F   | S   | I   | Q   | N   | A   |    |      |     |     |     |     |     |     |     |     |   |       |   |   |   |   |   |   |   |   |     |   |   |                                                                                                                                                                                                                                                                                                                                                                                                                                                                                                                                                                                                                                                                                |         |   |   |   |  |   |    |     |     |     |     |   |   |   |   |    |   |   |   |   |    |   |   |   |   |    |   |   |   |   |   |   |   |   |   |   |   |   |   |   |   |   |   |   |   |   |   |   |   |   |   |   |   |   |   |   |   |   |  |   |   |   |   |   |   |   |   |   |   |   |   |   |   |   |   |   |  |   |   |   |   |   |   |   |   |  |   |   |   |   |   |   |   |   |  |   |   |   |   |   |   |   |   |                                                                                                                                                                                                                                                                                                                                                                                                                                                                                                                                                                                                                                                                                                                                                                                                                                                                                                                                                                                                                                                                                                                                                                                                                                                                                                                                                                                                                                                                                                                                                                                                                                                                                                                                                                                                                                                                                                                                                                                                                                                                                                                                                                                                                                                                                                                                                                                                                                                                                                                                                                                                                                                                                                                                                                                                                                                                                                                                                                                                                                                                                                                                                                                                                                                                                                                                                                                                                                                                                                                                                                                                                                                                |         |  |  |  |  |  |  |  |      |  |   |     |     |     |     |     |     |   |       |   |   |   |   |   |   |   |  |    |   |   |   |   |   |   |   |  |   |   |   |   |   |   |   |   |  |   |   |   |   |   |   |   |   |  |   |   |   |   |   |   |   |   |  |   |   |   |   |   |   |   |   |  |   |   |   |   |   |   |   |   |  |   |   |   |   |   |   |   |   |  |   |   |   |   |   |   |   |   |  |   |   |   |   |   |   |   |   |  |   |   |   |   |   |   |   |   |  |   |   |   |   |   |   |   |   |  |   |   |   |   |   |   |   |   |   |       |   |   |   |   |   |   |   |  |     |   |   |   |   |   |   |   |  |    |   |   |   |   |   |   |   |  |    |   |   |   |   |   |   |   |  |    |   |   |   |   |   |   |   |  |    |   |   |   |   |   |   |   |  |    |   |   |   |   |   |   |   |  |   |   |   |   |   |   |   |   |  |   |   |   |   |   |   |   |   |  |   |   |   |   |   |   |   |   |  |   |   |   |   |   |   |   |   |  |   |   |   |   |   |   |   |   |  |   |   |   |   |   |   |   |   |  |   |   |   |   |   |   |   |   |  |   |   |   |   |   |   |   |   |  |   |   |   |   |   |   |   |   |  |   |   |   |   |   |   |   |   |  |   |   |   |   |   |   |   |   |  |   |   |   |   |   |   |   |   |   |     |   |   |   |   |   |   |   |  |   |   |   |   |   |   |   |   |                                                                                                                                                                                                                                                                                                                                                                                                                                                                                                                                                                                                                                                                                                                                                                                                                                                                                                                                                                                                                                                                                                                                                                                                                                                                                                                                                                                                                                                                                                                                                                                                                                                                                                                                                                                                                                                                                                                                                                                                                                                                                                                                                                                                                                                                                                                                                                                                                                                                                                                                                                                                                                                                                                                                                                                                                                                                                                                                                                                                                                                                                                                                                                                                                                                                                                                                                                                                                                                                                                                                                                                                                                                                                                                                                                  |         |  |  |  |  |  |  |  |      |  |   |     |     |     |     |     |     |       |       |   |   |   |   |   |   |   |  |     |   |   |   |   |   |   |   |  |     |   |   |   |   |   |   |   |  |     |   |   |   |   |   |   |   |  |    |   |   |   |   |   |   |   |  |    |   |   |   |   |   |   |   |  |    |   |   |   |   |   |   |   |  |    |   |   |   |   |   |   |   |  |    |   |   |   |   |   |   |   |  |    |   |   |   |   |   |   |   |  |   |   |   |   |   |   |   |   |  |   |   |   |   |   |   |   |   |  |   |   |   |   |   |   |   |   |  |   |   |   |   |   |   |   |   |  |   |   |   |   |   |   |   |   |  |   |   |   |   |   |   |   |   |  |   |   |   |   |   |   |   |   |  |   |   |   |   |   |   |   |   |  |   |   |   |   |   |   |   |   |  |   |   |   |   |   |   |   |   |  |   |   |   |   |   |   |   |   |  |   |   |   |   |   |   |   |   |  |   |   |   |   |   |   |   |   |  |   |   |   |   |   |   |   |   |  |   |   |   |   |   |   |   |   |  |   |   |   |   |   |   |   |   |  |   |   |   |   |   |   |   |   |  |   |   |   |   |   |   |   |   |  |   |   |   |   |   |   |   |   |  |   |   |   |   |   |   |   |   |  |   |   |   |   |   |   |   |   |  |   |   |   |   |   |   |   |   |  |   |   |   |   |   |   |   |   |  |   |   |   |   |   |   |   |   |  |   |   |   |   |   |   |   |   |
|         | 1                                                                                                                                                                                                                                                                                                                                                                                                                                                                                                                                                                                                                                                                                                                                                                                                                                                                                                                                                                                                                                                                                                                                                                                                                                                                                                                                                                                                                                                                                                        | A            | F   | S   | I   | Q   | N   | T   |    |      |     |     |     |     |     |     |     |     |   |       |   |   |   |   |   |   |   |   |     |   |   |                                                                                                                                                                                                                                                                                                                                                                                                                                                                                                                                                                                                                                                                                |         |   |   |   |  |   |    |     |     |     |     |   |   |   |   |    |   |   |   |   |    |   |   |   |   |    |   |   |   |   |   |   |   |   |   |   |   |   |   |   |   |   |   |   |   |   |   |   |   |   |   |   |   |   |   |   |   |   |  |   |   |   |   |   |   |   |   |   |   |   |   |   |   |   |   |   |  |   |   |   |   |   |   |   |   |  |   |   |   |   |   |   |   |   |  |   |   |   |   |   |   |   |   |                                                                                                                                                                                                                                                                                                                                                                                                                                                                                                                                                                                                                                                                                                                                                                                                                                                                                                                                                                                                                                                                                                                                                                                                                                                                                                                                                                                                                                                                                                                                                                                                                                                                                                                                                                                                                                                                                                                                                                                                                                                                                                                                                                                                                                                                                                                                                                                                                                                                                                                                                                                                                                                                                                                                                                                                                                                                                                                                                                                                                                                                                                                                                                                                                                                                                                                                                                                                                                                                                                                                                                                                                                                                |         |  |  |  |  |  |  |  |      |  |   |     |     |     |     |     |     |   |       |   |   |   |   |   |   |   |  |    |   |   |   |   |   |   |   |  |   |   |   |   |   |   |   |   |  |   |   |   |   |   |   |   |   |  |   |   |   |   |   |   |   |   |  |   |   |   |   |   |   |   |   |  |   |   |   |   |   |   |   |   |  |   |   |   |   |   |   |   |   |  |   |   |   |   |   |   |   |   |  |   |   |   |   |   |   |   |   |  |   |   |   |   |   |   |   |   |  |   |   |   |   |   |   |   |   |  |   |   |   |   |   |   |   |   |   |       |   |   |   |   |   |   |   |  |     |   |   |   |   |   |   |   |  |    |   |   |   |   |   |   |   |  |    |   |   |   |   |   |   |   |  |    |   |   |   |   |   |   |   |  |    |   |   |   |   |   |   |   |  |    |   |   |   |   |   |   |   |  |   |   |   |   |   |   |   |   |  |   |   |   |   |   |   |   |   |  |   |   |   |   |   |   |   |   |  |   |   |   |   |   |   |   |   |  |   |   |   |   |   |   |   |   |  |   |   |   |   |   |   |   |   |  |   |   |   |   |   |   |   |   |  |   |   |   |   |   |   |   |   |  |   |   |   |   |   |   |   |   |  |   |   |   |   |   |   |   |   |  |   |   |   |   |   |   |   |   |  |   |   |   |   |   |   |   |   |   |     |   |   |   |   |   |   |   |  |   |   |   |   |   |   |   |   |                                                                                                                                                                                                                                                                                                                                                                                                                                                                                                                                                                                                                                                                                                                                                                                                                                                                                                                                                                                                                                                                                                                                                                                                                                                                                                                                                                                                                                                                                                                                                                                                                                                                                                                                                                                                                                                                                                                                                                                                                                                                                                                                                                                                                                                                                                                                                                                                                                                                                                                                                                                                                                                                                                                                                                                                                                                                                                                                                                                                                                                                                                                                                                                                                                                                                                                                                                                                                                                                                                                                                                                                                                                                                                                                                                  |         |  |  |  |  |  |  |  |      |  |   |     |     |     |     |     |     |       |       |   |   |   |   |   |   |   |  |     |   |   |   |   |   |   |   |  |     |   |   |   |   |   |   |   |  |     |   |   |   |   |   |   |   |  |    |   |   |   |   |   |   |   |  |    |   |   |   |   |   |   |   |  |    |   |   |   |   |   |   |   |  |    |   |   |   |   |   |   |   |  |    |   |   |   |   |   |   |   |  |    |   |   |   |   |   |   |   |  |   |   |   |   |   |   |   |   |  |   |   |   |   |   |   |   |   |  |   |   |   |   |   |   |   |   |  |   |   |   |   |   |   |   |   |  |   |   |   |   |   |   |   |   |  |   |   |   |   |   |   |   |   |  |   |   |   |   |   |   |   |   |  |   |   |   |   |   |   |   |   |  |   |   |   |   |   |   |   |   |  |   |   |   |   |   |   |   |   |  |   |   |   |   |   |   |   |   |  |   |   |   |   |   |   |   |   |  |   |   |   |   |   |   |   |   |  |   |   |   |   |   |   |   |   |  |   |   |   |   |   |   |   |   |  |   |   |   |   |   |   |   |   |  |   |   |   |   |   |   |   |   |  |   |   |   |   |   |   |   |   |  |   |   |   |   |   |   |   |   |  |   |   |   |   |   |   |   |   |  |   |   |   |   |   |   |   |   |  |   |   |   |   |   |   |   |   |  |   |   |   |   |   |   |   |   |  |   |   |   |   |   |   |   |   |  |   |   |   |   |   |   |   |   |
|         | 1                                                                                                                                                                                                                                                                                                                                                                                                                                                                                                                                                                                                                                                                                                                                                                                                                                                                                                                                                                                                                                                                                                                                                                                                                                                                                                                                                                                                                                                                                                        | A            | F   | A   | N   | Q   | N   | T   |    |      |     |     |     |     |     |     |     |     |   |       |   |   |   |   |   |   |   |   |     |   |   |                                                                                                                                                                                                                                                                                                                                                                                                                                                                                                                                                                                                                                                                                |         |   |   |   |  |   |    |     |     |     |     |   |   |   |   |    |   |   |   |   |    |   |   |   |   |    |   |   |   |   |   |   |   |   |   |   |   |   |   |   |   |   |   |   |   |   |   |   |   |   |   |   |   |   |   |   |   |   |  |   |   |   |   |   |   |   |   |   |   |   |   |   |   |   |   |   |  |   |   |   |   |   |   |   |   |  |   |   |   |   |   |   |   |   |  |   |   |   |   |   |   |   |   |                                                                                                                                                                                                                                                                                                                                                                                                                                                                                                                                                                                                                                                                                                                                                                                                                                                                                                                                                                                                                                                                                                                                                                                                                                                                                                                                                                                                                                                                                                                                                                                                                                                                                                                                                                                                                                                                                                                                                                                                                                                                                                                                                                                                                                                                                                                                                                                                                                                                                                                                                                                                                                                                                                                                                                                                                                                                                                                                                                                                                                                                                                                                                                                                                                                                                                                                                                                                                                                                                                                                                                                                                                                                |         |  |  |  |  |  |  |  |      |  |   |     |     |     |     |     |     |   |       |   |   |   |   |   |   |   |  |    |   |   |   |   |   |   |   |  |   |   |   |   |   |   |   |   |  |   |   |   |   |   |   |   |   |  |   |   |   |   |   |   |   |   |  |   |   |   |   |   |   |   |   |  |   |   |   |   |   |   |   |   |  |   |   |   |   |   |   |   |   |  |   |   |   |   |   |   |   |   |  |   |   |   |   |   |   |   |   |  |   |   |   |   |   |   |   |   |  |   |   |   |   |   |   |   |   |  |   |   |   |   |   |   |   |   |   |       |   |   |   |   |   |   |   |  |     |   |   |   |   |   |   |   |  |    |   |   |   |   |   |   |   |  |    |   |   |   |   |   |   |   |  |    |   |   |   |   |   |   |   |  |    |   |   |   |   |   |   |   |  |    |   |   |   |   |   |   |   |  |   |   |   |   |   |   |   |   |  |   |   |   |   |   |   |   |   |  |   |   |   |   |   |   |   |   |  |   |   |   |   |   |   |   |   |  |   |   |   |   |   |   |   |   |  |   |   |   |   |   |   |   |   |  |   |   |   |   |   |   |   |   |  |   |   |   |   |   |   |   |   |  |   |   |   |   |   |   |   |   |  |   |   |   |   |   |   |   |   |  |   |   |   |   |   |   |   |   |  |   |   |   |   |   |   |   |   |   |     |   |   |   |   |   |   |   |  |   |   |   |   |   |   |   |   |                                                                                                                                                                                                                                                                                                                                                                                                                                                                                                                                                                                                                                                                                                                                                                                                                                                                                                                                                                                                                                                                                                                                                                                                                                                                                                                                                                                                                                                                                                                                                                                                                                                                                                                                                                                                                                                                                                                                                                                                                                                                                                                                                                                                                                                                                                                                                                                                                                                                                                                                                                                                                                                                                                                                                                                                                                                                                                                                                                                                                                                                                                                                                                                                                                                                                                                                                                                                                                                                                                                                                                                                                                                                                                                                                                  |         |  |  |  |  |  |  |  |      |  |   |     |     |     |     |     |     |       |       |   |   |   |   |   |   |   |  |     |   |   |   |   |   |   |   |  |     |   |   |   |   |   |   |   |  |     |   |   |   |   |   |   |   |  |    |   |   |   |   |   |   |   |  |    |   |   |   |   |   |   |   |  |    |   |   |   |   |   |   |   |  |    |   |   |   |   |   |   |   |  |    |   |   |   |   |   |   |   |  |    |   |   |   |   |   |   |   |  |   |   |   |   |   |   |   |   |  |   |   |   |   |   |   |   |   |  |   |   |   |   |   |   |   |   |  |   |   |   |   |   |   |   |   |  |   |   |   |   |   |   |   |   |  |   |   |   |   |   |   |   |   |  |   |   |   |   |   |   |   |   |  |   |   |   |   |   |   |   |   |  |   |   |   |   |   |   |   |   |  |   |   |   |   |   |   |   |   |  |   |   |   |   |   |   |   |   |  |   |   |   |   |   |   |   |   |  |   |   |   |   |   |   |   |   |  |   |   |   |   |   |   |   |   |  |   |   |   |   |   |   |   |   |  |   |   |   |   |   |   |   |   |  |   |   |   |   |   |   |   |   |  |   |   |   |   |   |   |   |   |  |   |   |   |   |   |   |   |   |  |   |   |   |   |   |   |   |   |  |   |   |   |   |   |   |   |   |  |   |   |   |   |   |   |   |   |  |   |   |   |   |   |   |   |   |  |   |   |   |   |   |   |   |   |  |   |   |   |   |   |   |   |   |
|         | 1                                                                                                                                                                                                                                                                                                                                                                                                                                                                                                                                                                                                                                                                                                                                                                                                                                                                                                                                                                                                                                                                                                                                                                                                                                                                                                                                                                                                                                                                                                        | A            | F   | S   | C   | Q   | N   | T   |    |      |     |     |     |     |     |     |     |     |   |       |   |   |   |   |   |   |   |   |     |   |   |                                                                                                                                                                                                                                                                                                                                                                                                                                                                                                                                                                                                                                                                                |         |   |   |   |  |   |    |     |     |     |     |   |   |   |   |    |   |   |   |   |    |   |   |   |   |    |   |   |   |   |   |   |   |   |   |   |   |   |   |   |   |   |   |   |   |   |   |   |   |   |   |   |   |   |   |   |   |   |  |   |   |   |   |   |   |   |   |   |   |   |   |   |   |   |   |   |  |   |   |   |   |   |   |   |   |  |   |   |   |   |   |   |   |   |  |   |   |   |   |   |   |   |   |                                                                                                                                                                                                                                                                                                                                                                                                                                                                                                                                                                                                                                                                                                                                                                                                                                                                                                                                                                                                                                                                                                                                                                                                                                                                                                                                                                                                                                                                                                                                                                                                                                                                                                                                                                                                                                                                                                                                                                                                                                                                                                                                                                                                                                                                                                                                                                                                                                                                                                                                                                                                                                                                                                                                                                                                                                                                                                                                                                                                                                                                                                                                                                                                                                                                                                                                                                                                                                                                                                                                                                                                                                                                |         |  |  |  |  |  |  |  |      |  |   |     |     |     |     |     |     |   |       |   |   |   |   |   |   |   |  |    |   |   |   |   |   |   |   |  |   |   |   |   |   |   |   |   |  |   |   |   |   |   |   |   |   |  |   |   |   |   |   |   |   |   |  |   |   |   |   |   |   |   |   |  |   |   |   |   |   |   |   |   |  |   |   |   |   |   |   |   |   |  |   |   |   |   |   |   |   |   |  |   |   |   |   |   |   |   |   |  |   |   |   |   |   |   |   |   |  |   |   |   |   |   |   |   |   |  |   |   |   |   |   |   |   |   |   |       |   |   |   |   |   |   |   |  |     |   |   |   |   |   |   |   |  |    |   |   |   |   |   |   |   |  |    |   |   |   |   |   |   |   |  |    |   |   |   |   |   |   |   |  |    |   |   |   |   |   |   |   |  |    |   |   |   |   |   |   |   |  |   |   |   |   |   |   |   |   |  |   |   |   |   |   |   |   |   |  |   |   |   |   |   |   |   |   |  |   |   |   |   |   |   |   |   |  |   |   |   |   |   |   |   |   |  |   |   |   |   |   |   |   |   |  |   |   |   |   |   |   |   |   |  |   |   |   |   |   |   |   |   |  |   |   |   |   |   |   |   |   |  |   |   |   |   |   |   |   |   |  |   |   |   |   |   |   |   |   |  |   |   |   |   |   |   |   |   |   |     |   |   |   |   |   |   |   |  |   |   |   |   |   |   |   |   |                                                                                                                                                                                                                                                                                                                                                                                                                                                                                                                                                                                                                                                                                                                                                                                                                                                                                                                                                                                                                                                                                                                                                                                                                                                                                                                                                                                                                                                                                                                                                                                                                                                                                                                                                                                                                                                                                                                                                                                                                                                                                                                                                                                                                                                                                                                                                                                                                                                                                                                                                                                                                                                                                                                                                                                                                                                                                                                                                                                                                                                                                                                                                                                                                                                                                                                                                                                                                                                                                                                                                                                                                                                                                                                                                                  |         |  |  |  |  |  |  |  |      |  |   |     |     |     |     |     |     |       |       |   |   |   |   |   |   |   |  |     |   |   |   |   |   |   |   |  |     |   |   |   |   |   |   |   |  |     |   |   |   |   |   |   |   |  |    |   |   |   |   |   |   |   |  |    |   |   |   |   |   |   |   |  |    |   |   |   |   |   |   |   |  |    |   |   |   |   |   |   |   |  |    |   |   |   |   |   |   |   |  |    |   |   |   |   |   |   |   |  |   |   |   |   |   |   |   |   |  |   |   |   |   |   |   |   |   |  |   |   |   |   |   |   |   |   |  |   |   |   |   |   |   |   |   |  |   |   |   |   |   |   |   |   |  |   |   |   |   |   |   |   |   |  |   |   |   |   |   |   |   |   |  |   |   |   |   |   |   |   |   |  |   |   |   |   |   |   |   |   |  |   |   |   |   |   |   |   |   |  |   |   |   |   |   |   |   |   |  |   |   |   |   |   |   |   |   |  |   |   |   |   |   |   |   |   |  |   |   |   |   |   |   |   |   |  |   |   |   |   |   |   |   |   |  |   |   |   |   |   |   |   |   |  |   |   |   |   |   |   |   |   |  |   |   |   |   |   |   |   |   |  |   |   |   |   |   |   |   |   |  |   |   |   |   |   |   |   |   |  |   |   |   |   |   |   |   |   |  |   |   |   |   |   |   |   |   |  |   |   |   |   |   |   |   |   |  |   |   |   |   |   |   |   |   |  |   |   |   |   |   |   |   |   |
|         | 1                                                                                                                                                                                                                                                                                                                                                                                                                                                                                                                                                                                                                                                                                                                                                                                                                                                                                                                                                                                                                                                                                                                                                                                                                                                                                                                                                                                                                                                                                                        | A            | F   | N   | I   | Q   | N   | T   |    |      |     |     |     |     |     |     |     |     |   |       |   |   |   |   |   |   |   |   |     |   |   |                                                                                                                                                                                                                                                                                                                                                                                                                                                                                                                                                                                                                                                                                |         |   |   |   |  |   |    |     |     |     |     |   |   |   |   |    |   |   |   |   |    |   |   |   |   |    |   |   |   |   |   |   |   |   |   |   |   |   |   |   |   |   |   |   |   |   |   |   |   |   |   |   |   |   |   |   |   |   |  |   |   |   |   |   |   |   |   |   |   |   |   |   |   |   |   |   |  |   |   |   |   |   |   |   |   |  |   |   |   |   |   |   |   |   |  |   |   |   |   |   |   |   |   |                                                                                                                                                                                                                                                                                                                                                                                                                                                                                                                                                                                                                                                                                                                                                                                                                                                                                                                                                                                                                                                                                                                                                                                                                                                                                                                                                                                                                                                                                                                                                                                                                                                                                                                                                                                                                                                                                                                                                                                                                                                                                                                                                                                                                                                                                                                                                                                                                                                                                                                                                                                                                                                                                                                                                                                                                                                                                                                                                                                                                                                                                                                                                                                                                                                                                                                                                                                                                                                                                                                                                                                                                                                                |         |  |  |  |  |  |  |  |      |  |   |     |     |     |     |     |     |   |       |   |   |   |   |   |   |   |  |    |   |   |   |   |   |   |   |  |   |   |   |   |   |   |   |   |  |   |   |   |   |   |   |   |   |  |   |   |   |   |   |   |   |   |  |   |   |   |   |   |   |   |   |  |   |   |   |   |   |   |   |   |  |   |   |   |   |   |   |   |   |  |   |   |   |   |   |   |   |   |  |   |   |   |   |   |   |   |   |  |   |   |   |   |   |   |   |   |  |   |   |   |   |   |   |   |   |  |   |   |   |   |   |   |   |   |   |       |   |   |   |   |   |   |   |  |     |   |   |   |   |   |   |   |  |    |   |   |   |   |   |   |   |  |    |   |   |   |   |   |   |   |  |    |   |   |   |   |   |   |   |  |    |   |   |   |   |   |   |   |  |    |   |   |   |   |   |   |   |  |   |   |   |   |   |   |   |   |  |   |   |   |   |   |   |   |   |  |   |   |   |   |   |   |   |   |  |   |   |   |   |   |   |   |   |  |   |   |   |   |   |   |   |   |  |   |   |   |   |   |   |   |   |  |   |   |   |   |   |   |   |   |  |   |   |   |   |   |   |   |   |  |   |   |   |   |   |   |   |   |  |   |   |   |   |   |   |   |   |  |   |   |   |   |   |   |   |   |  |   |   |   |   |   |   |   |   |   |     |   |   |   |   |   |   |   |  |   |   |   |   |   |   |   |   |                                                                                                                                                                                                                                                                                                                                                                                                                                                                                                                                                                                                                                                                                                                                                                                                                                                                                                                                                                                                                                                                                                                                                                                                                                                                                                                                                                                                                                                                                                                                                                                                                                                                                                                                                                                                                                                                                                                                                                                                                                                                                                                                                                                                                                                                                                                                                                                                                                                                                                                                                                                                                                                                                                                                                                                                                                                                                                                                                                                                                                                                                                                                                                                                                                                                                                                                                                                                                                                                                                                                                                                                                                                                                                                                                                  |         |  |  |  |  |  |  |  |      |  |   |     |     |     |     |     |     |       |       |   |   |   |   |   |   |   |  |     |   |   |   |   |   |   |   |  |     |   |   |   |   |   |   |   |  |     |   |   |   |   |   |   |   |  |    |   |   |   |   |   |   |   |  |    |   |   |   |   |   |   |   |  |    |   |   |   |   |   |   |   |  |    |   |   |   |   |   |   |   |  |    |   |   |   |   |   |   |   |  |    |   |   |   |   |   |   |   |  |   |   |   |   |   |   |   |   |  |   |   |   |   |   |   |   |   |  |   |   |   |   |   |   |   |   |  |   |   |   |   |   |   |   |   |  |   |   |   |   |   |   |   |   |  |   |   |   |   |   |   |   |   |  |   |   |   |   |   |   |   |   |  |   |   |   |   |   |   |   |   |  |   |   |   |   |   |   |   |   |  |   |   |   |   |   |   |   |   |  |   |   |   |   |   |   |   |   |  |   |   |   |   |   |   |   |   |  |   |   |   |   |   |   |   |   |  |   |   |   |   |   |   |   |   |  |   |   |   |   |   |   |   |   |  |   |   |   |   |   |   |   |   |  |   |   |   |   |   |   |   |   |  |   |   |   |   |   |   |   |   |  |   |   |   |   |   |   |   |   |  |   |   |   |   |   |   |   |   |  |   |   |   |   |   |   |   |   |  |   |   |   |   |   |   |   |   |  |   |   |   |   |   |   |   |   |  |   |   |   |   |   |   |   |   |  |   |   |   |   |   |   |   |   |
|         | 1                                                                                                                                                                                                                                                                                                                                                                                                                                                                                                                                                                                                                                                                                                                                                                                                                                                                                                                                                                                                                                                                                                                                                                                                                                                                                                                                                                                                                                                                                                        | A            | F   | S   | H   | Q   | N   | T   |    |      |     |     |     |     |     |     |     |     |   |       |   |   |   |   |   |   |   |   |     |   |   |                                                                                                                                                                                                                                                                                                                                                                                                                                                                                                                                                                                                                                                                                |         |   |   |   |  |   |    |     |     |     |     |   |   |   |   |    |   |   |   |   |    |   |   |   |   |    |   |   |   |   |   |   |   |   |   |   |   |   |   |   |   |   |   |   |   |   |   |   |   |   |   |   |   |   |   |   |   |   |  |   |   |   |   |   |   |   |   |   |   |   |   |   |   |   |   |   |  |   |   |   |   |   |   |   |   |  |   |   |   |   |   |   |   |   |  |   |   |   |   |   |   |   |   |                                                                                                                                                                                                                                                                                                                                                                                                                                                                                                                                                                                                                                                                                                                                                                                                                                                                                                                                                                                                                                                                                                                                                                                                                                                                                                                                                                                                                                                                                                                                                                                                                                                                                                                                                                                                                                                                                                                                                                                                                                                                                                                                                                                                                                                                                                                                                                                                                                                                                                                                                                                                                                                                                                                                                                                                                                                                                                                                                                                                                                                                                                                                                                                                                                                                                                                                                                                                                                                                                                                                                                                                                                                                |         |  |  |  |  |  |  |  |      |  |   |     |     |     |     |     |     |   |       |   |   |   |   |   |   |   |  |    |   |   |   |   |   |   |   |  |   |   |   |   |   |   |   |   |  |   |   |   |   |   |   |   |   |  |   |   |   |   |   |   |   |   |  |   |   |   |   |   |   |   |   |  |   |   |   |   |   |   |   |   |  |   |   |   |   |   |   |   |   |  |   |   |   |   |   |   |   |   |  |   |   |   |   |   |   |   |   |  |   |   |   |   |   |   |   |   |  |   |   |   |   |   |   |   |   |  |   |   |   |   |   |   |   |   |   |       |   |   |   |   |   |   |   |  |     |   |   |   |   |   |   |   |  |    |   |   |   |   |   |   |   |  |    |   |   |   |   |   |   |   |  |    |   |   |   |   |   |   |   |  |    |   |   |   |   |   |   |   |  |    |   |   |   |   |   |   |   |  |   |   |   |   |   |   |   |   |  |   |   |   |   |   |   |   |   |  |   |   |   |   |   |   |   |   |  |   |   |   |   |   |   |   |   |  |   |   |   |   |   |   |   |   |  |   |   |   |   |   |   |   |   |  |   |   |   |   |   |   |   |   |  |   |   |   |   |   |   |   |   |  |   |   |   |   |   |   |   |   |  |   |   |   |   |   |   |   |   |  |   |   |   |   |   |   |   |   |  |   |   |   |   |   |   |   |   |   |     |   |   |   |   |   |   |   |  |   |   |   |   |   |   |   |   |                                                                                                                                                                                                                                                                                                                                                                                                                                                                                                                                                                                                                                                                                                                                                                                                                                                                                                                                                                                                                                                                                                                                                                                                                                                                                                                                                                                                                                                                                                                                                                                                                                                                                                                                                                                                                                                                                                                                                                                                                                                                                                                                                                                                                                                                                                                                                                                                                                                                                                                                                                                                                                                                                                                                                                                                                                                                                                                                                                                                                                                                                                                                                                                                                                                                                                                                                                                                                                                                                                                                                                                                                                                                                                                                                                  |         |  |  |  |  |  |  |  |      |  |   |     |     |     |     |     |     |       |       |   |   |   |   |   |   |   |  |     |   |   |   |   |   |   |   |  |     |   |   |   |   |   |   |   |  |     |   |   |   |   |   |   |   |  |    |   |   |   |   |   |   |   |  |    |   |   |   |   |   |   |   |  |    |   |   |   |   |   |   |   |  |    |   |   |   |   |   |   |   |  |    |   |   |   |   |   |   |   |  |    |   |   |   |   |   |   |   |  |   |   |   |   |   |   |   |   |  |   |   |   |   |   |   |   |   |  |   |   |   |   |   |   |   |   |  |   |   |   |   |   |   |   |   |  |   |   |   |   |   |   |   |   |  |   |   |   |   |   |   |   |   |  |   |   |   |   |   |   |   |   |  |   |   |   |   |   |   |   |   |  |   |   |   |   |   |   |   |   |  |   |   |   |   |   |   |   |   |  |   |   |   |   |   |   |   |   |  |   |   |   |   |   |   |   |   |  |   |   |   |   |   |   |   |   |  |   |   |   |   |   |   |   |   |  |   |   |   |   |   |   |   |   |  |   |   |   |   |   |   |   |   |  |   |   |   |   |   |   |   |   |  |   |   |   |   |   |   |   |   |  |   |   |   |   |   |   |   |   |  |   |   |   |   |   |   |   |   |  |   |   |   |   |   |   |   |   |  |   |   |   |   |   |   |   |   |  |   |   |   |   |   |   |   |   |  |   |   |   |   |   |   |   |   |  |   |   |   |   |   |   |   |   |
|         | 1                                                                                                                                                                                                                                                                                                                                                                                                                                                                                                                                                                                                                                                                                                                                                                                                                                                                                                                                                                                                                                                                                                                                                                                                                                                                                                                                                                                                                                                                                                        | A            | F   | S   | Y   | Q   | N   | S   |    |      |     |     |     |     |     |     |     |     |   |       |   |   |   |   |   |   |   |   |     |   |   |                                                                                                                                                                                                                                                                                                                                                                                                                                                                                                                                                                                                                                                                                |         |   |   |   |  |   |    |     |     |     |     |   |   |   |   |    |   |   |   |   |    |   |   |   |   |    |   |   |   |   |   |   |   |   |   |   |   |   |   |   |   |   |   |   |   |   |   |   |   |   |   |   |   |   |   |   |   |   |  |   |   |   |   |   |   |   |   |   |   |   |   |   |   |   |   |   |  |   |   |   |   |   |   |   |   |  |   |   |   |   |   |   |   |   |  |   |   |   |   |   |   |   |   |                                                                                                                                                                                                                                                                                                                                                                                                                                                                                                                                                                                                                                                                                                                                                                                                                                                                                                                                                                                                                                                                                                                                                                                                                                                                                                                                                                                                                                                                                                                                                                                                                                                                                                                                                                                                                                                                                                                                                                                                                                                                                                                                                                                                                                                                                                                                                                                                                                                                                                                                                                                                                                                                                                                                                                                                                                                                                                                                                                                                                                                                                                                                                                                                                                                                                                                                                                                                                                                                                                                                                                                                                                                                |         |  |  |  |  |  |  |  |      |  |   |     |     |     |     |     |     |   |       |   |   |   |   |   |   |   |  |    |   |   |   |   |   |   |   |  |   |   |   |   |   |   |   |   |  |   |   |   |   |   |   |   |   |  |   |   |   |   |   |   |   |   |  |   |   |   |   |   |   |   |   |  |   |   |   |   |   |   |   |   |  |   |   |   |   |   |   |   |   |  |   |   |   |   |   |   |   |   |  |   |   |   |   |   |   |   |   |  |   |   |   |   |   |   |   |   |  |   |   |   |   |   |   |   |   |  |   |   |   |   |   |   |   |   |   |       |   |   |   |   |   |   |   |  |     |   |   |   |   |   |   |   |  |    |   |   |   |   |   |   |   |  |    |   |   |   |   |   |   |   |  |    |   |   |   |   |   |   |   |  |    |   |   |   |   |   |   |   |  |    |   |   |   |   |   |   |   |  |   |   |   |   |   |   |   |   |  |   |   |   |   |   |   |   |   |  |   |   |   |   |   |   |   |   |  |   |   |   |   |   |   |   |   |  |   |   |   |   |   |   |   |   |  |   |   |   |   |   |   |   |   |  |   |   |   |   |   |   |   |   |  |   |   |   |   |   |   |   |   |  |   |   |   |   |   |   |   |   |  |   |   |   |   |   |   |   |   |  |   |   |   |   |   |   |   |   |  |   |   |   |   |   |   |   |   |   |     |   |   |   |   |   |   |   |  |   |   |   |   |   |   |   |   |                                                                                                                                                                                                                                                                                                                                                                                                                                                                                                                                                                                                                                                                                                                                                                                                                                                                                                                                                                                                                                                                                                                                                                                                                                                                                                                                                                                                                                                                                                                                                                                                                                                                                                                                                                                                                                                                                                                                                                                                                                                                                                                                                                                                                                                                                                                                                                                                                                                                                                                                                                                                                                                                                                                                                                                                                                                                                                                                                                                                                                                                                                                                                                                                                                                                                                                                                                                                                                                                                                                                                                                                                                                                                                                                                                  |         |  |  |  |  |  |  |  |      |  |   |     |     |     |     |     |     |       |       |   |   |   |   |   |   |   |  |     |   |   |   |   |   |   |   |  |     |   |   |   |   |   |   |   |  |     |   |   |   |   |   |   |   |  |    |   |   |   |   |   |   |   |  |    |   |   |   |   |   |   |   |  |    |   |   |   |   |   |   |   |  |    |   |   |   |   |   |   |   |  |    |   |   |   |   |   |   |   |  |    |   |   |   |   |   |   |   |  |   |   |   |   |   |   |   |   |  |   |   |   |   |   |   |   |   |  |   |   |   |   |   |   |   |   |  |   |   |   |   |   |   |   |   |  |   |   |   |   |   |   |   |   |  |   |   |   |   |   |   |   |   |  |   |   |   |   |   |   |   |   |  |   |   |   |   |   |   |   |   |  |   |   |   |   |   |   |   |   |  |   |   |   |   |   |   |   |   |  |   |   |   |   |   |   |   |   |  |   |   |   |   |   |   |   |   |  |   |   |   |   |   |   |   |   |  |   |   |   |   |   |   |   |   |  |   |   |   |   |   |   |   |   |  |   |   |   |   |   |   |   |   |  |   |   |   |   |   |   |   |   |  |   |   |   |   |   |   |   |   |  |   |   |   |   |   |   |   |   |  |   |   |   |   |   |   |   |   |  |   |   |   |   |   |   |   |   |  |   |   |   |   |   |   |   |   |  |   |   |   |   |   |   |   |   |  |   |   |   |   |   |   |   |   |  |   |   |   |   |   |   |   |   |
|         | 1                                                                                                                                                                                                                                                                                                                                                                                                                                                                                                                                                                                                                                                                                                                                                                                                                                                                                                                                                                                                                                                                                                                                                                                                                                                                                                                                                                                                                                                                                                        | P            | F   | S   | Y   | Q   | N   | T   |    |      |     |     |     |     |     |     |     |     |   |       |   |   |   |   |   |   |   |   |     |   |   |                                                                                                                                                                                                                                                                                                                                                                                                                                                                                                                                                                                                                                                                                |         |   |   |   |  |   |    |     |     |     |     |   |   |   |   |    |   |   |   |   |    |   |   |   |   |    |   |   |   |   |   |   |   |   |   |   |   |   |   |   |   |   |   |   |   |   |   |   |   |   |   |   |   |   |   |   |   |   |  |   |   |   |   |   |   |   |   |   |   |   |   |   |   |   |   |   |  |   |   |   |   |   |   |   |   |  |   |   |   |   |   |   |   |   |  |   |   |   |   |   |   |   |   |                                                                                                                                                                                                                                                                                                                                                                                                                                                                                                                                                                                                                                                                                                                                                                                                                                                                                                                                                                                                                                                                                                                                                                                                                                                                                                                                                                                                                                                                                                                                                                                                                                                                                                                                                                                                                                                                                                                                                                                                                                                                                                                                                                                                                                                                                                                                                                                                                                                                                                                                                                                                                                                                                                                                                                                                                                                                                                                                                                                                                                                                                                                                                                                                                                                                                                                                                                                                                                                                                                                                                                                                                                                                |         |  |  |  |  |  |  |  |      |  |   |     |     |     |     |     |     |   |       |   |   |   |   |   |   |   |  |    |   |   |   |   |   |   |   |  |   |   |   |   |   |   |   |   |  |   |   |   |   |   |   |   |   |  |   |   |   |   |   |   |   |   |  |   |   |   |   |   |   |   |   |  |   |   |   |   |   |   |   |   |  |   |   |   |   |   |   |   |   |  |   |   |   |   |   |   |   |   |  |   |   |   |   |   |   |   |   |  |   |   |   |   |   |   |   |   |  |   |   |   |   |   |   |   |   |  |   |   |   |   |   |   |   |   |   |       |   |   |   |   |   |   |   |  |     |   |   |   |   |   |   |   |  |    |   |   |   |   |   |   |   |  |    |   |   |   |   |   |   |   |  |    |   |   |   |   |   |   |   |  |    |   |   |   |   |   |   |   |  |    |   |   |   |   |   |   |   |  |   |   |   |   |   |   |   |   |  |   |   |   |   |   |   |   |   |  |   |   |   |   |   |   |   |   |  |   |   |   |   |   |   |   |   |  |   |   |   |   |   |   |   |   |  |   |   |   |   |   |   |   |   |  |   |   |   |   |   |   |   |   |  |   |   |   |   |   |   |   |   |  |   |   |   |   |   |   |   |   |  |   |   |   |   |   |   |   |   |  |   |   |   |   |   |   |   |   |  |   |   |   |   |   |   |   |   |   |     |   |   |   |   |   |   |   |  |   |   |   |   |   |   |   |   |                                                                                                                                                                                                                                                                                                                                                                                                                                                                                                                                                                                                                                                                                                                                                                                                                                                                                                                                                                                                                                                                                                                                                                                                                                                                                                                                                                                                                                                                                                                                                                                                                                                                                                                                                                                                                                                                                                                                                                                                                                                                                                                                                                                                                                                                                                                                                                                                                                                                                                                                                                                                                                                                                                                                                                                                                                                                                                                                                                                                                                                                                                                                                                                                                                                                                                                                                                                                                                                                                                                                                                                                                                                                                                                                                                  |         |  |  |  |  |  |  |  |      |  |   |     |     |     |     |     |     |       |       |   |   |   |   |   |   |   |  |     |   |   |   |   |   |   |   |  |     |   |   |   |   |   |   |   |  |     |   |   |   |   |   |   |   |  |    |   |   |   |   |   |   |   |  |    |   |   |   |   |   |   |   |  |    |   |   |   |   |   |   |   |  |    |   |   |   |   |   |   |   |  |    |   |   |   |   |   |   |   |  |    |   |   |   |   |   |   |   |  |   |   |   |   |   |   |   |   |  |   |   |   |   |   |   |   |   |  |   |   |   |   |   |   |   |   |  |   |   |   |   |   |   |   |   |  |   |   |   |   |   |   |   |   |  |   |   |   |   |   |   |   |   |  |   |   |   |   |   |   |   |   |  |   |   |   |   |   |   |   |   |  |   |   |   |   |   |   |   |   |  |   |   |   |   |   |   |   |   |  |   |   |   |   |   |   |   |   |  |   |   |   |   |   |   |   |   |  |   |   |   |   |   |   |   |   |  |   |   |   |   |   |   |   |   |  |   |   |   |   |   |   |   |   |  |   |   |   |   |   |   |   |   |  |   |   |   |   |   |   |   |   |  |   |   |   |   |   |   |   |   |  |   |   |   |   |   |   |   |   |  |   |   |   |   |   |   |   |   |  |   |   |   |   |   |   |   |   |  |   |   |   |   |   |   |   |   |  |   |   |   |   |   |   |   |   |  |   |   |   |   |   |   |   |   |  |   |   |   |   |   |   |   |   |
|         | 1                                                                                                                                                                                                                                                                                                                                                                                                                                                                                                                                                                                                                                                                                                                                                                                                                                                                                                                                                                                                                                                                                                                                                                                                                                                                                                                                                                                                                                                                                                        | A            | F   | A   | F   | Q   | N   | A   |    |      |     |     |     |     |     |     |     |     |   |       |   |   |   |   |   |   |   |   |     |   |   |                                                                                                                                                                                                                                                                                                                                                                                                                                                                                                                                                                                                                                                                                |         |   |   |   |  |   |    |     |     |     |     |   |   |   |   |    |   |   |   |   |    |   |   |   |   |    |   |   |   |   |   |   |   |   |   |   |   |   |   |   |   |   |   |   |   |   |   |   |   |   |   |   |   |   |   |   |   |   |  |   |   |   |   |   |   |   |   |   |   |   |   |   |   |   |   |   |  |   |   |   |   |   |   |   |   |  |   |   |   |   |   |   |   |   |  |   |   |   |   |   |   |   |   |                                                                                                                                                                                                                                                                                                                                                                                                                                                                                                                                                                                                                                                                                                                                                                                                                                                                                                                                                                                                                                                                                                                                                                                                                                                                                                                                                                                                                                                                                                                                                                                                                                                                                                                                                                                                                                                                                                                                                                                                                                                                                                                                                                                                                                                                                                                                                                                                                                                                                                                                                                                                                                                                                                                                                                                                                                                                                                                                                                                                                                                                                                                                                                                                                                                                                                                                                                                                                                                                                                                                                                                                                                                                |         |  |  |  |  |  |  |  |      |  |   |     |     |     |     |     |     |   |       |   |   |   |   |   |   |   |  |    |   |   |   |   |   |   |   |  |   |   |   |   |   |   |   |   |  |   |   |   |   |   |   |   |   |  |   |   |   |   |   |   |   |   |  |   |   |   |   |   |   |   |   |  |   |   |   |   |   |   |   |   |  |   |   |   |   |   |   |   |   |  |   |   |   |   |   |   |   |   |  |   |   |   |   |   |   |   |   |  |   |   |   |   |   |   |   |   |  |   |   |   |   |   |   |   |   |  |   |   |   |   |   |   |   |   |   |       |   |   |   |   |   |   |   |  |     |   |   |   |   |   |   |   |  |    |   |   |   |   |   |   |   |  |    |   |   |   |   |   |   |   |  |    |   |   |   |   |   |   |   |  |    |   |   |   |   |   |   |   |  |    |   |   |   |   |   |   |   |  |   |   |   |   |   |   |   |   |  |   |   |   |   |   |   |   |   |  |   |   |   |   |   |   |   |   |  |   |   |   |   |   |   |   |   |  |   |   |   |   |   |   |   |   |  |   |   |   |   |   |   |   |   |  |   |   |   |   |   |   |   |   |  |   |   |   |   |   |   |   |   |  |   |   |   |   |   |   |   |   |  |   |   |   |   |   |   |   |   |  |   |   |   |   |   |   |   |   |  |   |   |   |   |   |   |   |   |   |     |   |   |   |   |   |   |   |  |   |   |   |   |   |   |   |   |                                                                                                                                                                                                                                                                                                                                                                                                                                                                                                                                                                                                                                                                                                                                                                                                                                                                                                                                                                                                                                                                                                                                                                                                                                                                                                                                                                                                                                                                                                                                                                                                                                                                                                                                                                                                                                                                                                                                                                                                                                                                                                                                                                                                                                                                                                                                                                                                                                                                                                                                                                                                                                                                                                                                                                                                                                                                                                                                                                                                                                                                                                                                                                                                                                                                                                                                                                                                                                                                                                                                                                                                                                                                                                                                                                  |         |  |  |  |  |  |  |  |      |  |   |     |     |     |     |     |     |       |       |   |   |   |   |   |   |   |  |     |   |   |   |   |   |   |   |  |     |   |   |   |   |   |   |   |  |     |   |   |   |   |   |   |   |  |    |   |   |   |   |   |   |   |  |    |   |   |   |   |   |   |   |  |    |   |   |   |   |   |   |   |  |    |   |   |   |   |   |   |   |  |    |   |   |   |   |   |   |   |  |    |   |   |   |   |   |   |   |  |   |   |   |   |   |   |   |   |  |   |   |   |   |   |   |   |   |  |   |   |   |   |   |   |   |   |  |   |   |   |   |   |   |   |   |  |   |   |   |   |   |   |   |   |  |   |   |   |   |   |   |   |   |  |   |   |   |   |   |   |   |   |  |   |   |   |   |   |   |   |   |  |   |   |   |   |   |   |   |   |  |   |   |   |   |   |   |   |   |  |   |   |   |   |   |   |   |   |  |   |   |   |   |   |   |   |   |  |   |   |   |   |   |   |   |   |  |   |   |   |   |   |   |   |   |  |   |   |   |   |   |   |   |   |  |   |   |   |   |   |   |   |   |  |   |   |   |   |   |   |   |   |  |   |   |   |   |   |   |   |   |  |   |   |   |   |   |   |   |   |  |   |   |   |   |   |   |   |   |  |   |   |   |   |   |   |   |   |  |   |   |   |   |   |   |   |   |  |   |   |   |   |   |   |   |   |  |   |   |   |   |   |   |   |   |  |   |   |   |   |   |   |   |   |

**Supplementary Material Table S1.** Complete genomes, NS1 and VP2 CPV-2 strains showing the highest nucleotide identities to the identified strain.

| % Id.                  | CPV-2 type | Strain/Isolate                                | Acc.nr.  | Host | Country     | Year |
|------------------------|------------|-----------------------------------------------|----------|------|-------------|------|
| Nearly complete genome |            |                                               |          |      |             |      |
| 99.60                  | CPV-2c     | CPV609                                        | MN451682 | Dog  | Nigeria     | 2018 |
| 99.58                  | CPV-2c     | CPV-SH1516                                    | MG013488 | Dog  | Cina        | 2017 |
|                        | CPV-2c     | CPV605                                        | MN451678 | Dog  | Nigeria     | 2018 |
|                        | CPV-2c     | IZSSI_PA1464/19_idNC                          | MK895489 | Dog  | Nigeria     | 2018 |
|                        | CPV-2c     | IZSSI_PA1464/19_idPSV21                       | MK895490 | Dog  | Nigeria     | 2018 |
|                        | CPV-2c     | IZSSI_PA1464/19_idN1_TR_4A72                  | MT840292 | Dog  | Nigeria     | 2018 |
|                        | CPV-2c     | IZSSI_PA1464/19_idV4_TR_4A72                  | MT840293 | Dog  | Nigeria     | 2018 |
| 99.55                  | CPV-2c     | CU21                                          | MH711902 | Cat  | Thailand    | 2016 |
|                        | CPV-2c     | Canine/China/18/2017                          | MH476587 | Dog  | China       | 2017 |
|                        | CPV-2c     | CPV_IZSSI_2743_17                             | MF510157 | Dog  | Italy       | 2017 |
|                        | CPV-2c     | IZSSI_PA1464/19_idEV8                         | MK895487 | Dog  | Nigeria     | 2018 |
|                        | CPV-2c     | IZSSI_PA1464/19_idEV5_TR_4A72                 | MT840291 | Dog  | Nigeria     | 2018 |
|                        | CPV-2c     | IZSSI_PA1464/19_idYV7_TR_4A72                 | MT840294 | Dog  | Nigeria     | 2018 |
| NS1 gene               |            |                                               |          |      |             |      |
| 99.75                  | CPV-2a     | CPV/CN/LN1/2014                               | KR002800 | Dog  | China       | 2014 |
|                        | CPV-2c     | CPV-SH1516                                    | MG013488 | Dog  | China       | 2017 |
|                        | CPV-2c     | Canine/China/23/2017                          | MH476592 | Dog  | China       | 2017 |
|                        | CPV-2c     | Canine/China/14/2017                          | MH476583 | Dog  | China       | 2017 |
|                        | CPV-2c     | XA-CPV2c-0-17                                 | MZ836427 | Dog  | China       | 2019 |
|                        | CPV-2c     | XA-CPV2c-0-22                                 | MZ836422 | Dog  | China       | 2019 |
|                        | CPV-2c     | XA-CPV2c-0-16                                 | MZ836408 | Dog  | China       | 2019 |
|                        | CPV-2c     | TZ-CPV2c-138                                  | MZ836407 | Dog  | China       | 2019 |
|                        | n.a.       | TZ-CPV-158                                    | MZ836399 | Dog  | China       | 2019 |
|                        | CPV-2a     | TZ-newCPV2a-142                               | MZ836396 | Dog  | China       | 2019 |
|                        | CPV-2c     | XA-CPV2c-0-6                                  | MZ836391 | Dog  | China       | 2019 |
|                        | CPV-2c     | XA-CPV2c-0-13                                 | MZ836385 | Dog  | China       | 2019 |
|                        | CPV-2c     | JN-CPV2c-9                                    | MZ836381 | Dog  | China       | 2019 |
|                        | CPV-2c     | TZ-CPV2c-126                                  | MZ836380 | Dog  | China       | 2019 |
|                        | CPV-2c     | CPV-AHcf4                                     | MT648210 | Dog  | China       | 2019 |
|                        | CPV-2c     | China-XA-1                                    | MZ506743 | Dog  | China       | 2019 |
|                        | CPV-2c     | HN07                                          | MT106228 | Dog  | Vietnam     | 2017 |
|                        | CPV-2c     | CPV_IZSSI_2743_17                             | MF510157 | Dog  | Italy       | 2017 |
|                        | CPV-2c     | IZSSI_PA24478/18_id3184                       | MK806279 | Dog  | Italy       | 2018 |
|                        | CPV-2c     | IZSSI_PA24478/18_id3230                       | MK806280 | Dog  | Italy       | 2018 |
|                        | CPV-2c     | IZSSI_PA31342/18                              | MK806281 | Dog  | Italy       | 2018 |
|                        | CPV-2c     | CPV609                                        | MN451682 | Dog  | Nigeria     | 2018 |
|                        | CPV-2c     | CPV605                                        | MN451678 | Dog  | Nigeria     | 2018 |
|                        | CPV-2c     | IZSSI_PA1464/19_idNC                          | MK895489 | Dog  | Nigeria     | 2018 |
|                        | CPV-2c     | IZSSI_PA1464/19_idPSV21                       | MK895490 | Dog  | Nigeria     | 2018 |
| VP2 gene               |            |                                               |          |      |             |      |
|                        | CPV-2c     | CPV-VT12                                      | KP715688 | Dog  | Thailand    | 2010 |
|                        | CPV-2c     | CU24                                          | MH711894 | Dog  | Thailand    | 2016 |
|                        | CPV-2c     | CU21                                          | MH711902 | Cat  | Thailand    | 2016 |
|                        | CPV-2c     | TRC-B90/TH/202                                | MW589468 | Dog  | Thailand    | 2020 |
|                        | CPV-2c     | CPV/dog/HCM/2/2013                            | LC216904 | Dog  | Indonesia   | 2013 |
|                        | CPV-2b     | Coonamble/NewSouthWales/Canisfamiliarias/2016 | MN259001 | Dog  | Australia   | 2016 |
|                        | CPV-2b     | Coonamble/NewSouthWales/Canisfamiliarias/2015 | MN258995 | Dog  | Australia   | 2015 |
|                        | CPV-2c     | K01708-1                                      | MK144544 | Dog  | South Korea | 2017 |

|        |                               |          |     |         |      |
|--------|-------------------------------|----------|-----|---------|------|
| CPV-2c | HN07                          | MT106228 | Dog | Vietnam | 2017 |
| CPV-2c | CPV-SH1516                    | MG013488 | Dog | China   | 2017 |
| CPV-2c | Canine/China/14/2017          | MH476583 | Dog | China   | 2017 |
| CPV-2c | Canine/China/18/2017          | MH476587 | Dog | China   | 2017 |
| CPV-2c | CPV-AHhf27                    | MT648203 | Dog | China   | 2019 |
| CPV-2c | JSYZ-69                       | MW017581 | Dog | China   | 2019 |
| CPV-2c | China-XA-1                    | MZ506743 | Dog | China   | 2019 |
| CPV-2c | CPV-SH2001                    | MW650830 | Dog | China   | 2020 |
| CPV-2c | CPV-SH2003                    | MW811189 | Dog | China   | 2020 |
| CPV-2c | ZJHN-136                      | MW017617 | Dog | China   | 2020 |
| CPV-2c | CPV_IZSSI_2743_17             | MF510157 | Dog | Italy   | 2017 |
| CPV-2c | CPV609                        | MN451682 | Dog | Nigeria | 2018 |
| CPV-2c | CPV605                        | MN451678 | Dog | Nigeria | 2018 |
| CPV-2c | IZSSI_PA1464/19_idV4_TR_4A72  | MT840293 | Dog | Nigeria | 2018 |
| CPV-2c | IZSSI_PA1464/19_idYV7_TR_4A72 | MT840294 | Dog | Nigeria | 2018 |
| CPV-2c | 157/2019                      | MW659469 | Dog | Romania | 2019 |
| CPV-2c | 158/2019                      | MW659470 | Dog | Romania | 2019 |
| CPV-2c | 159/2019                      | MW659471 | Dog | Romania | 2019 |
| CPV-2c | 160/2019                      | MW659472 | Dog | Romania | 2019 |
| CPV-2c | 161/2019                      | MW659473 | Dog | Romania | 2019 |
| CPV-2c | 162/2019                      | MW659474 | Dog | Romania | 2019 |
| CPV-2c | 163/2019                      | MW659475 | Dog | Romania | 2019 |
| CPV-2c | 164/2019                      | MW659476 | Dog | Romania | 2019 |
| CPV-2c | 165/2019                      | MW659477 | Dog | Romania | 2019 |
| CPV-2c | 166/2019                      | MW659478 | Dog | Romania | 2019 |

---
